# Supplementary material for: Quantitative Analysis of Proteome in Non-functional Pituitary Adenomas: Clinical Relevance and Potential Benefits for the Patients
Source: PubMed Central journal article supplement (PMC6915109; doi:10.3389/fendo.2019.00854), 2019-12-05

## Supplemental Figure 1

### 52 statistically significant KEGG pathways enriched with 1088 overlapped molecules (DEGs; proteins)

1. Focal adhesion
2. Carbon metabolism
3. Platelet activation
4. Dopaminergic synapse
5. Human cytomegalovirus infection
6. Proteoglycans in cancer
7. Regulation of actin cytoskeleton
8. cGMP-PKG signaling pathway
9. Retrograde endocannabinoid signaling
10. Biosynthesis of amino acids
11. Thyroid hormone signaling pathway
12. Adrenergic signaling in cardiomyocytes
13. ECM-receptor interaction
14. Relaxin signaling pathway
15. Insulin signaling pathway
16. PPAR signaling pathway
17. Neurotrophin signaling pathway
18. Estrogen signaling pathway
19. Dilated cardiomyopathy (DCM)
20. Hypertrophic cardiomyopathy (HCM)
21. Circadian entrainment
22. Glucagon signaling pathway
23. Glycolysis / Gluconeogenesis
24. Phagosome
25. Salivary secretion
26. Aldosterone synthesis and secretion
27. Pancreatic secretion
28. Inflammatory mediator regulation of TRP channels
29. C-type lectin receptor signaling pathway
30. Cholinergic synapse
31. Gap junction
32. GnRH signaling pathway
33. HIF-1 signaling pathway
34. Fatty acid metabolism
35. Arrhythmogenic right ventricular cardiomyopathy (ARVC)
36. Small cell lung cancer
37. Adipocytokine signaling pathway
38. Amphetamine addiction
39. Gastric acid secretion
40. Glycine, serine and threonine metabolism
41. Arginine and proline metabolism
42. Ferroptosis
43. Cysteine and methionine metabolism
44. Pyruvate metabolism
45. Fatty acid degradation
46. Biosynthesis of unsaturated fatty acids
47. Citrate cycle (TCA cycle)
48. Pentose phosphate pathway
49. Glyoxylate and dicarboxylate metabolism
50. Mucin type O-glycan biosynthesis
51. Propanoate metabolism
52. Proximal tubule bicarbonate reclamation

**FOCAL ADHESION**

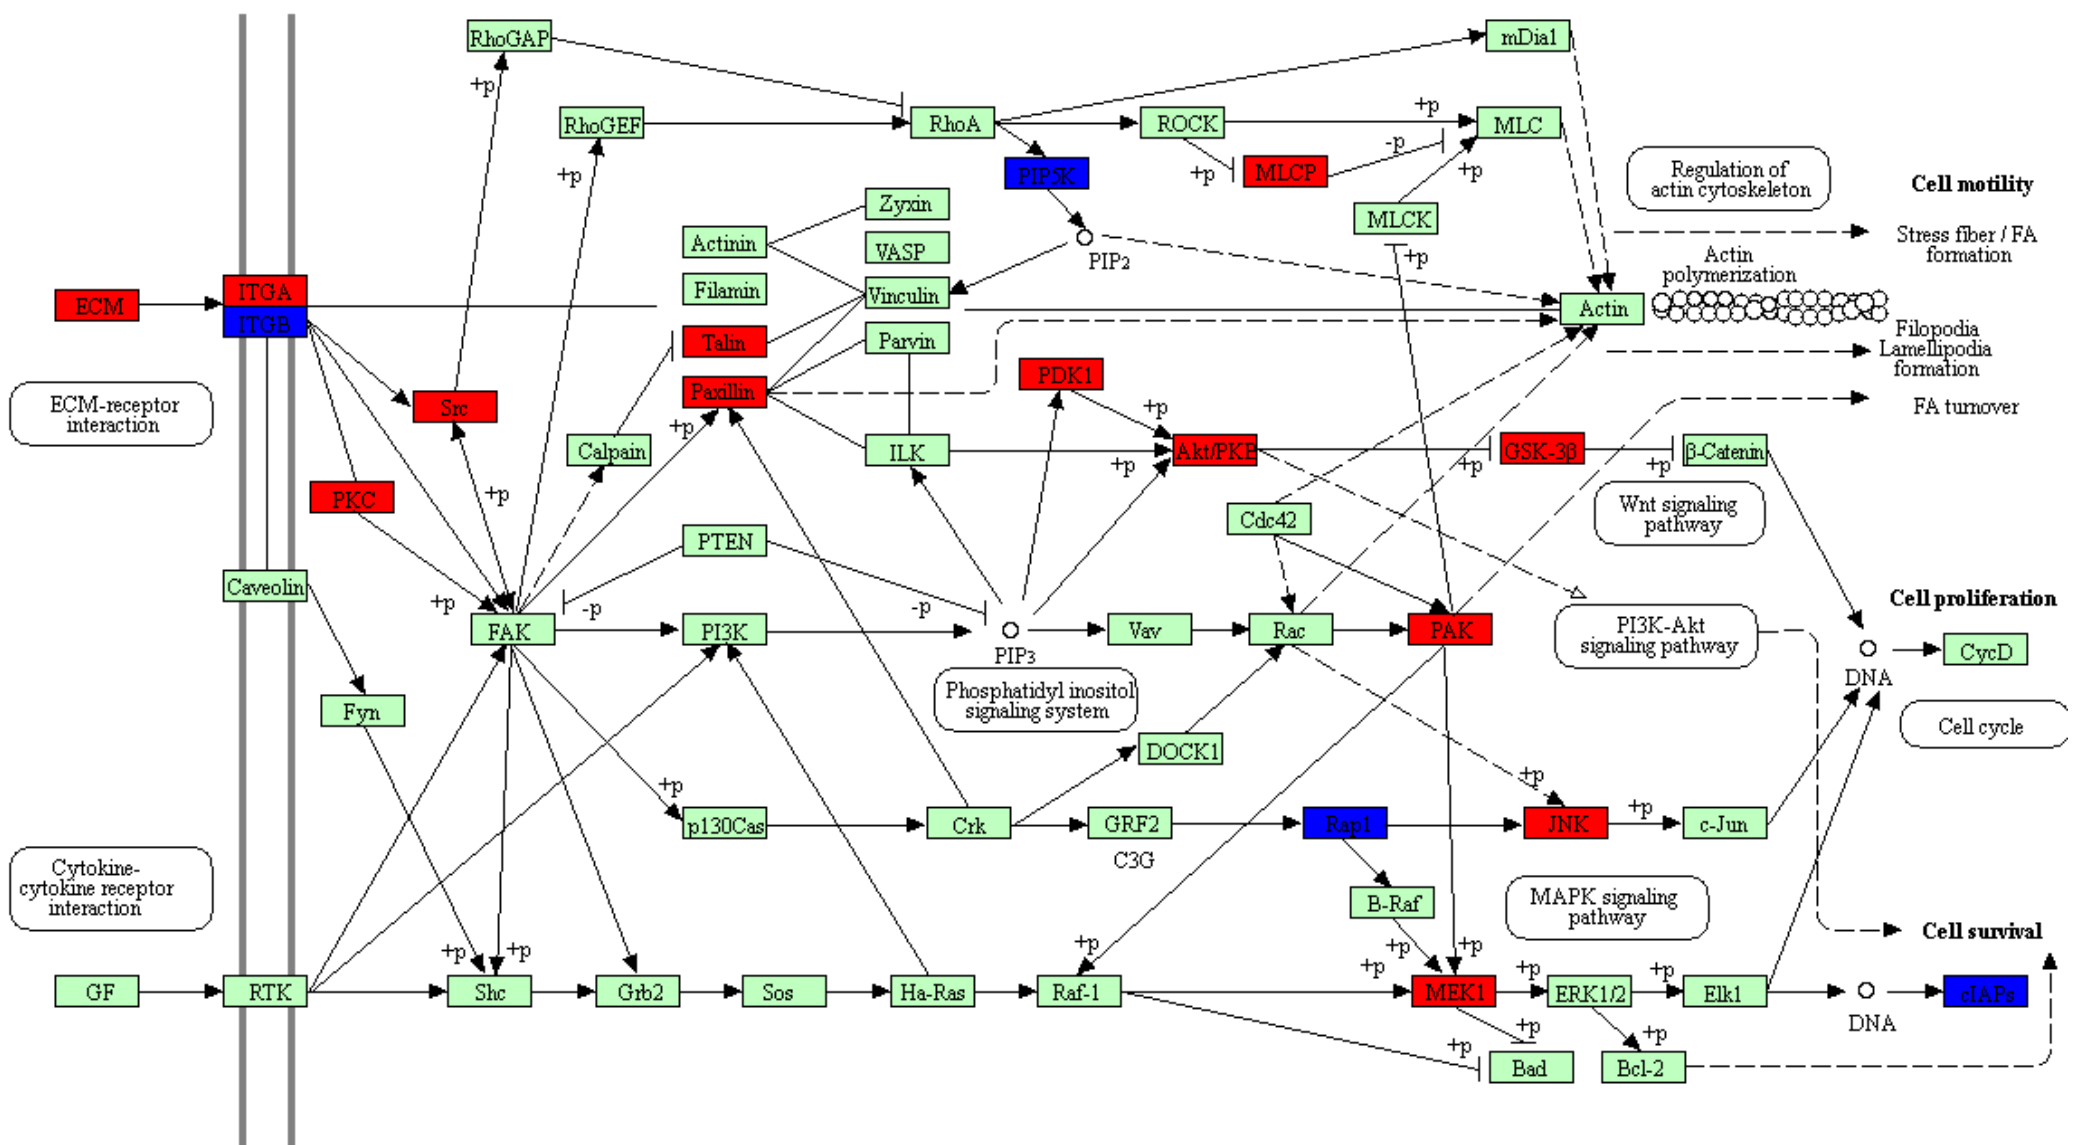



PLATELET ACTIVATION

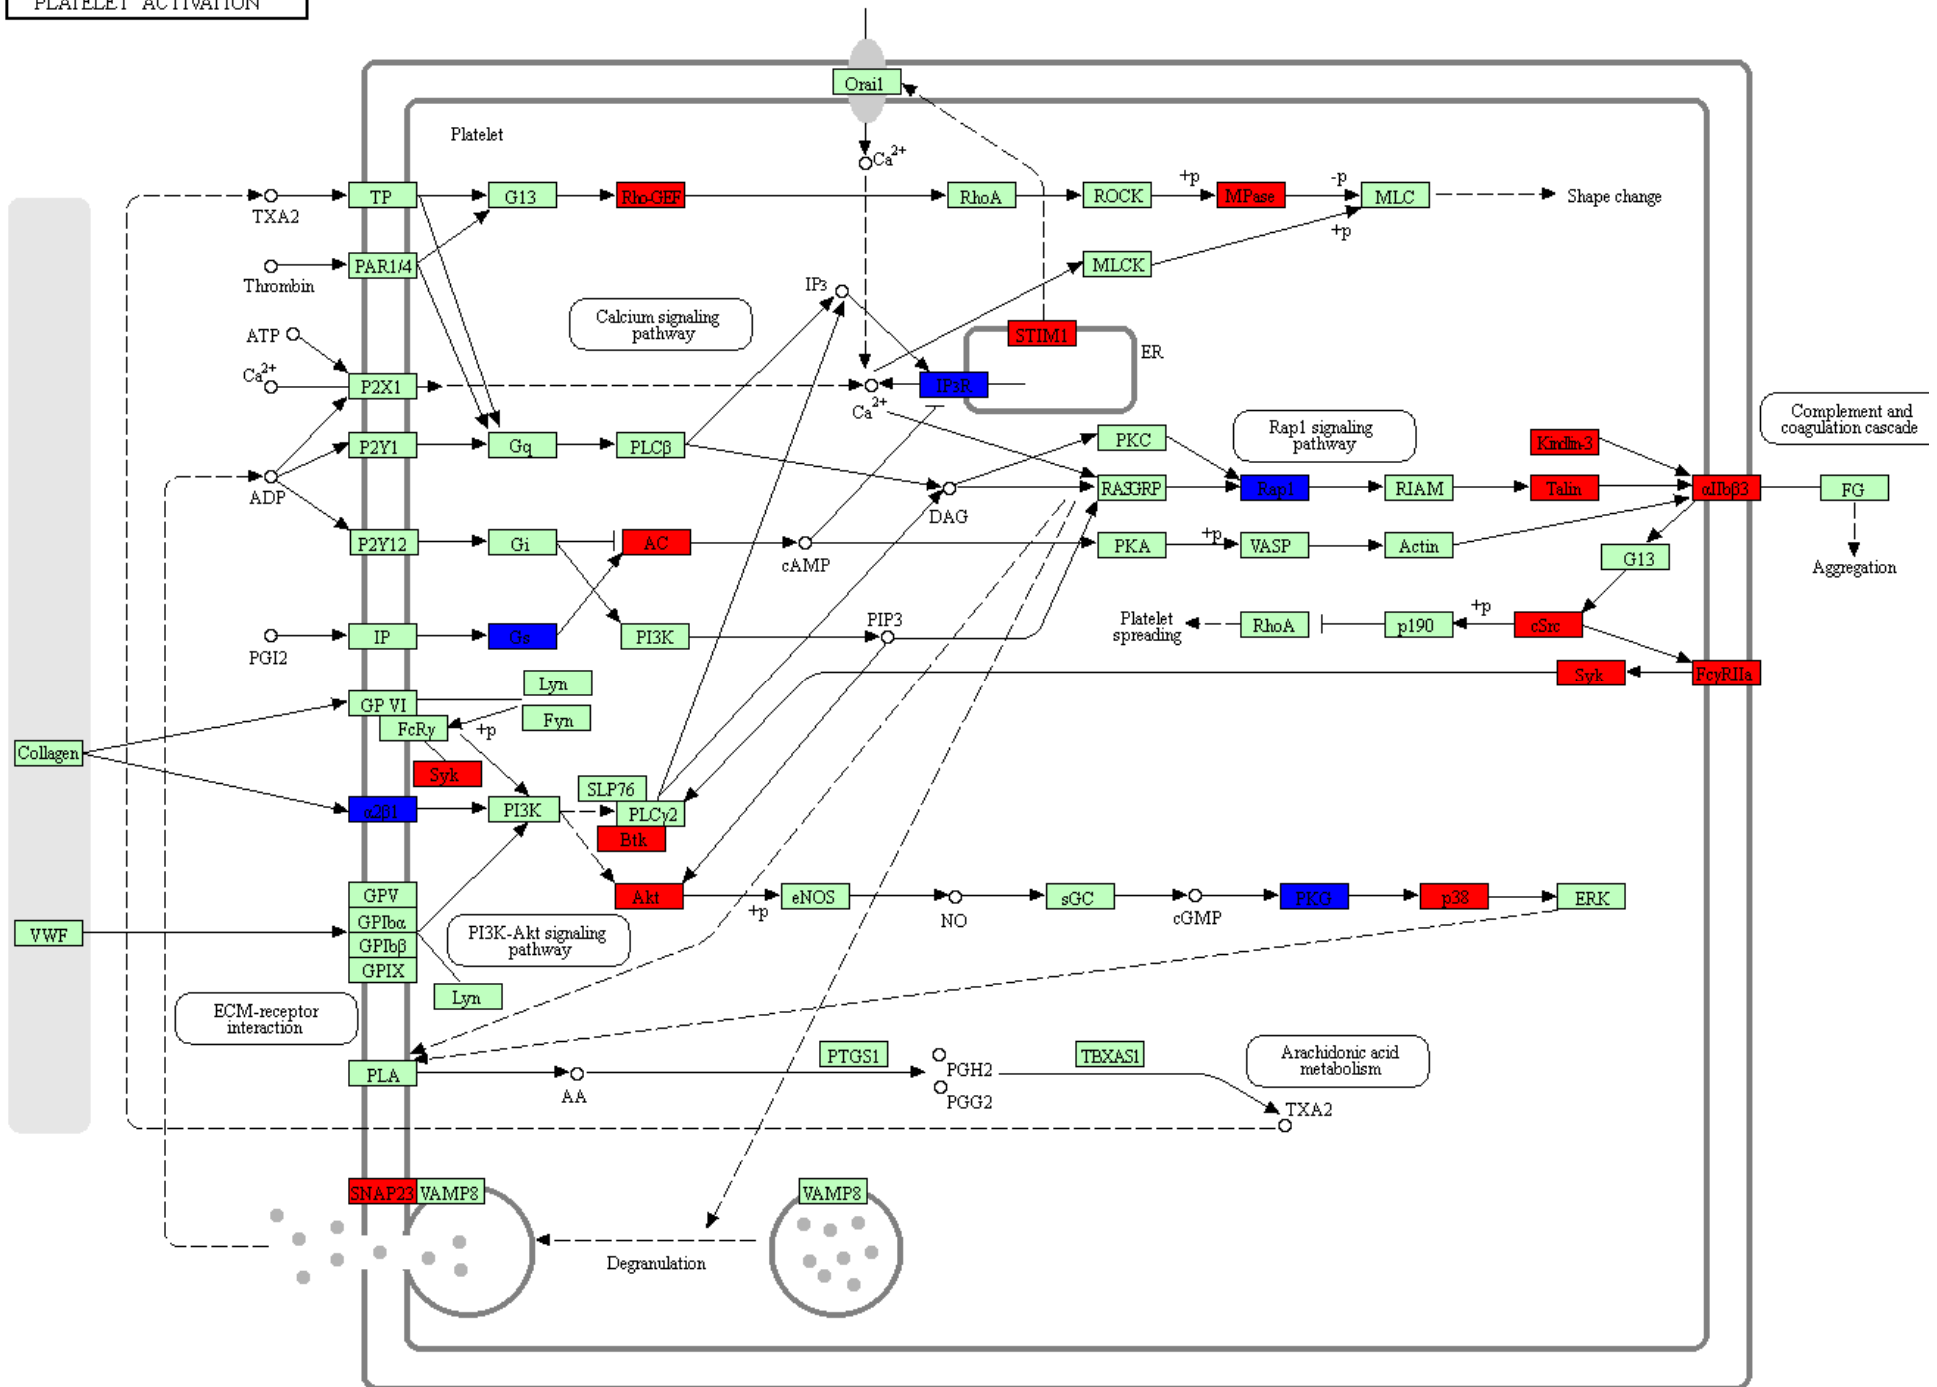

DOPAMINERGIC SYNAPSE

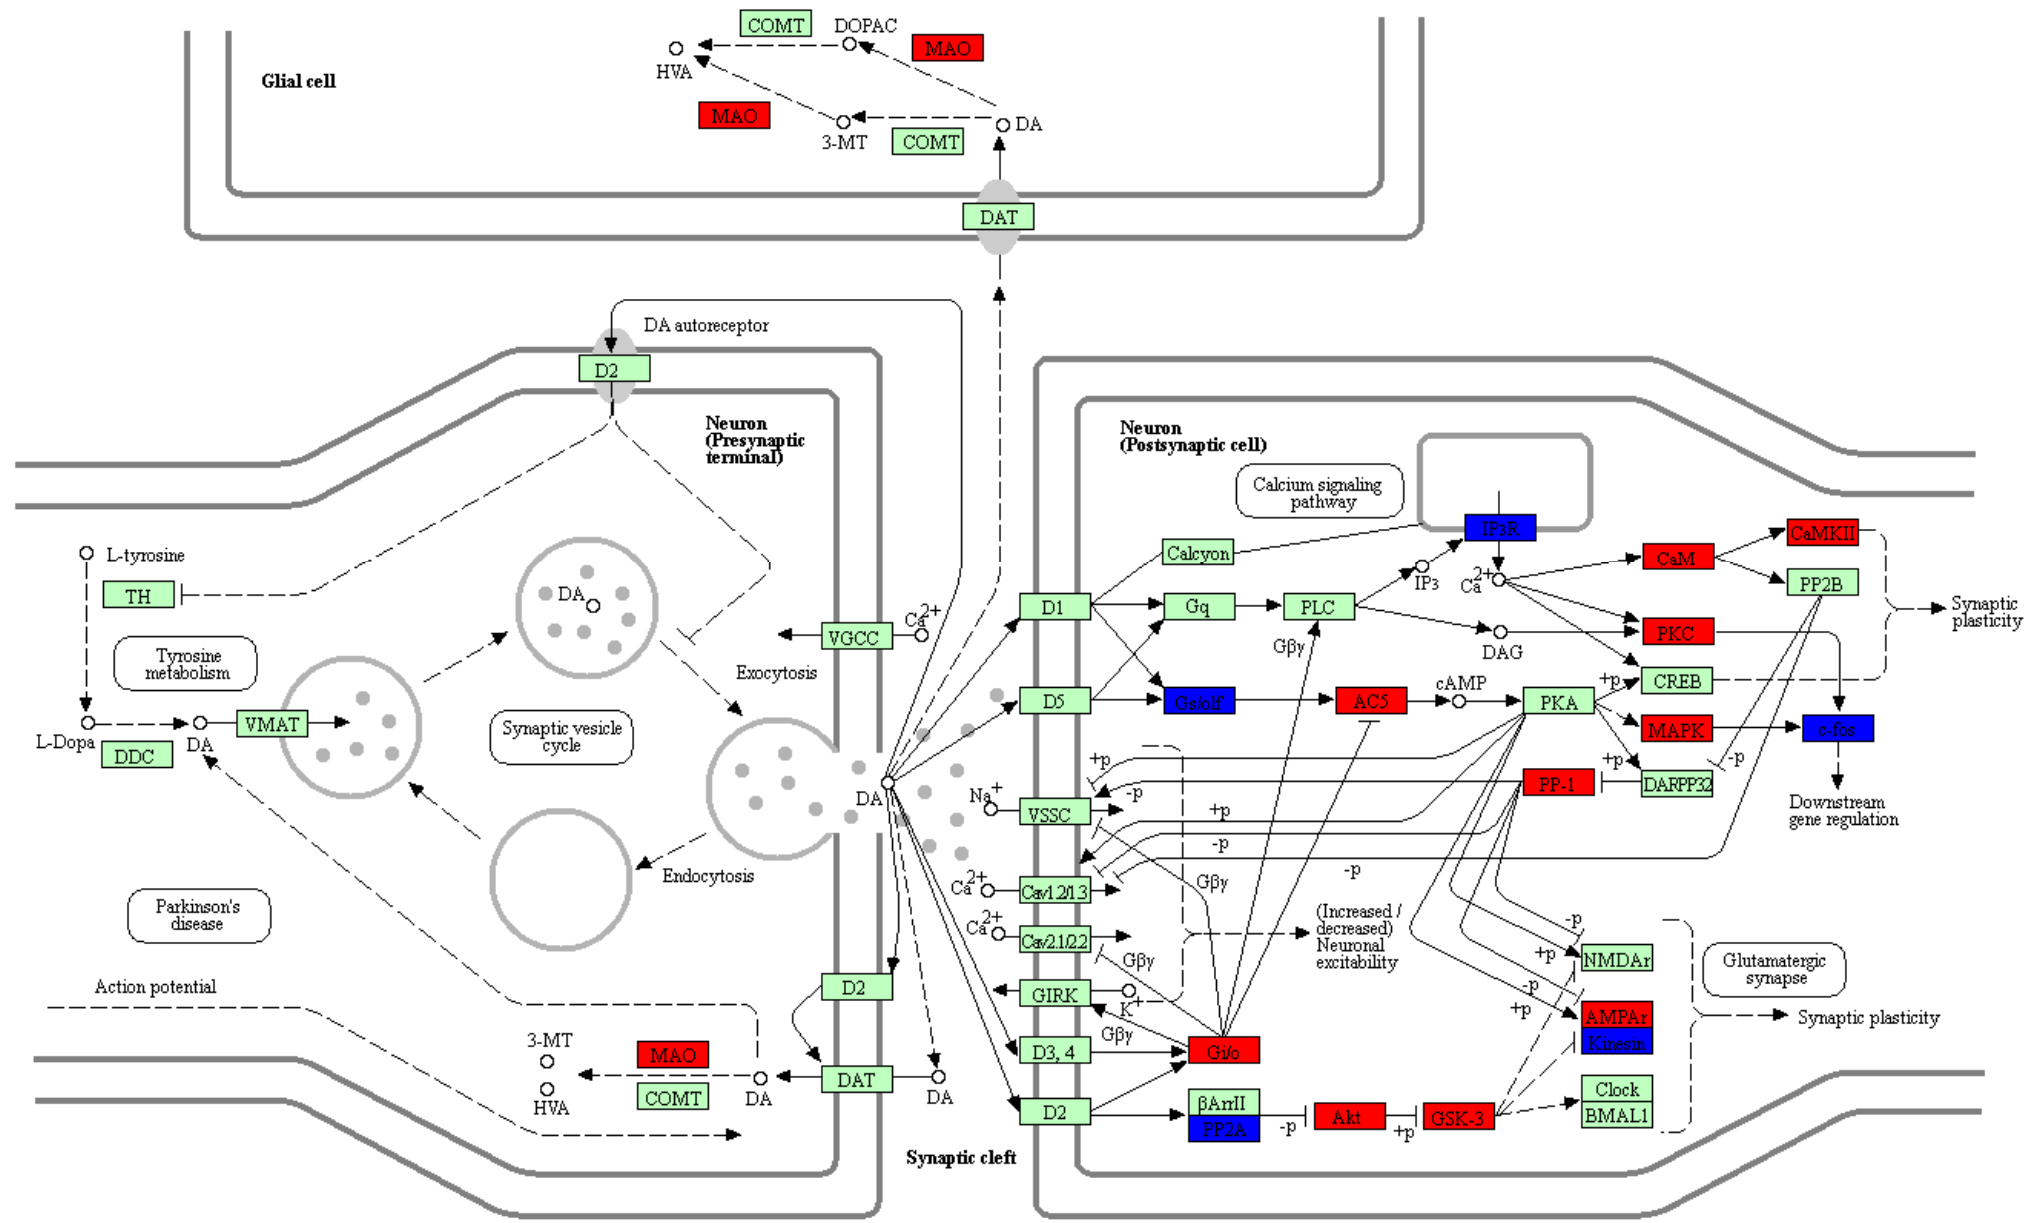

HUMAN CYTOMEGALOVIRUS INFECTION

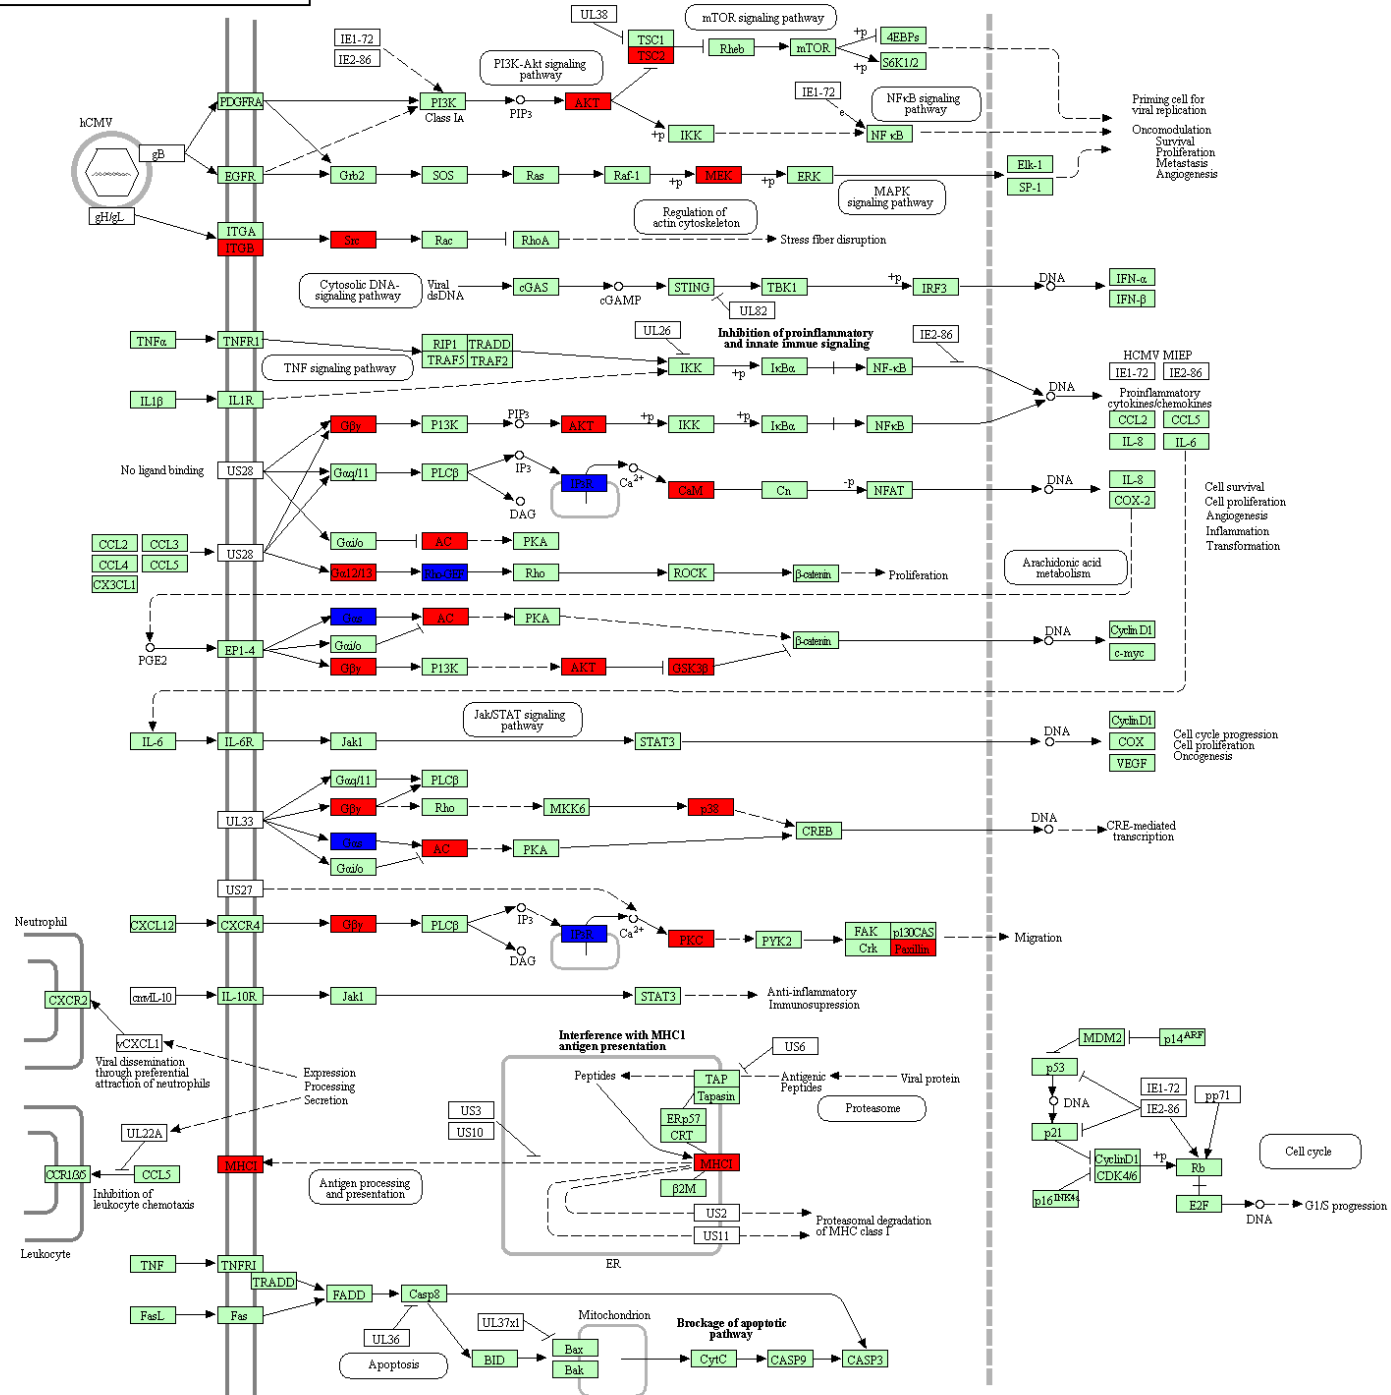

PROTEOGLYCAN IN CANCER

Hyaluronan (HA)

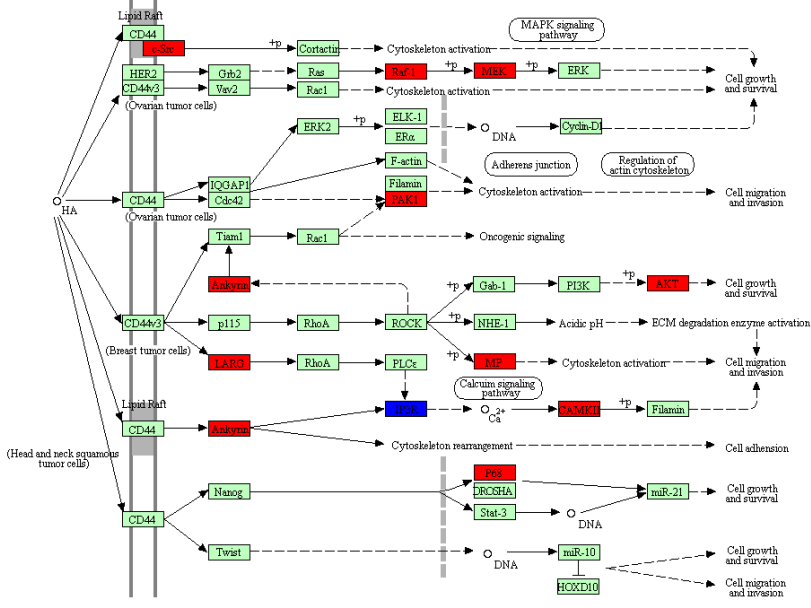

Chondroitin sulfate/ Dermatan sulfate proteoglycan (CSPG/DSPG)

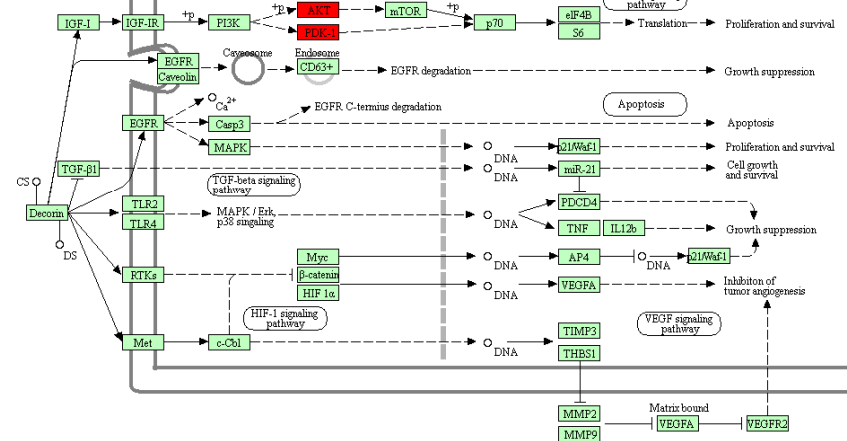

Keratan sulfate proteoglycan (KSPG)

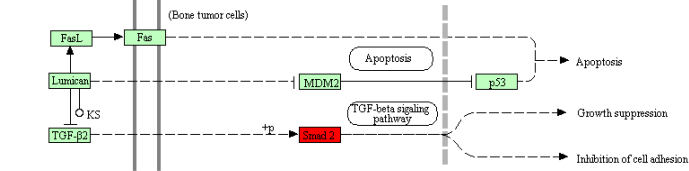

Heparan sulfate proteoglycans (HSPGs)

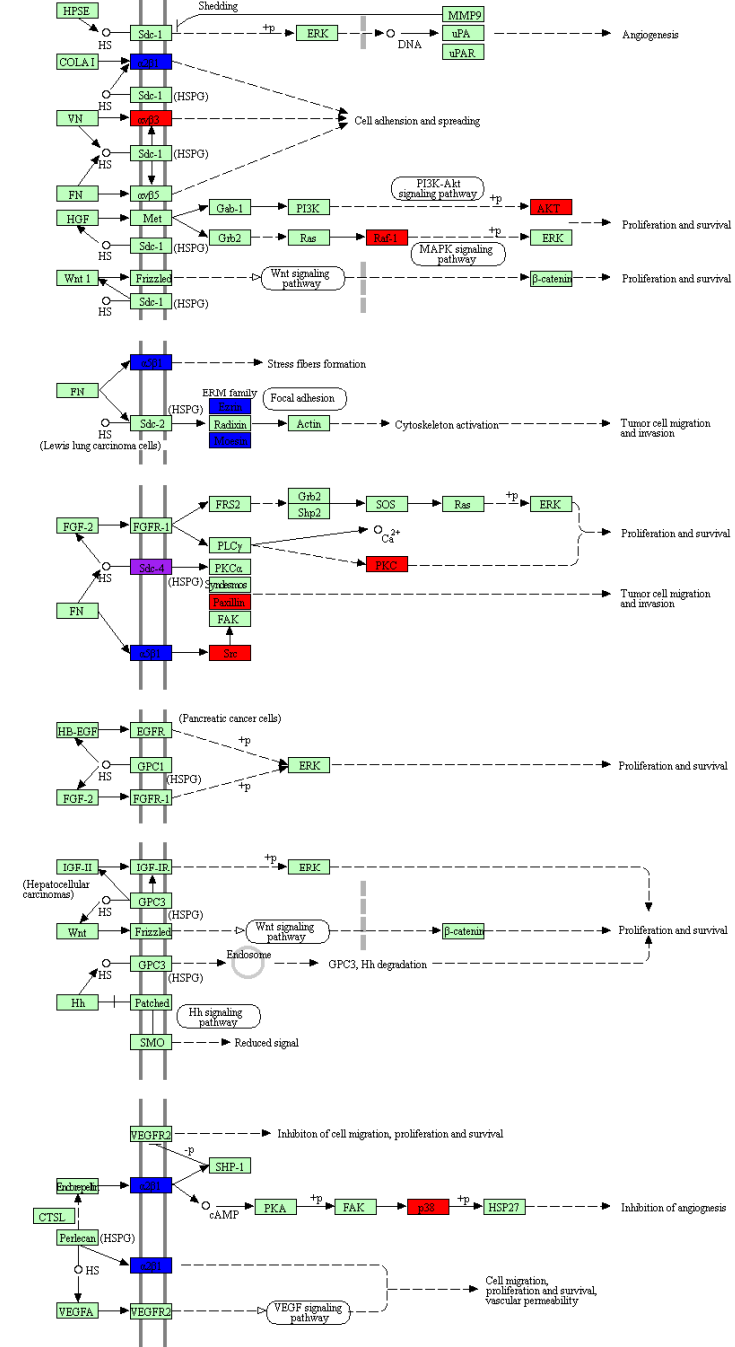

REGULATION OF ACTIN CYTOSKELETON

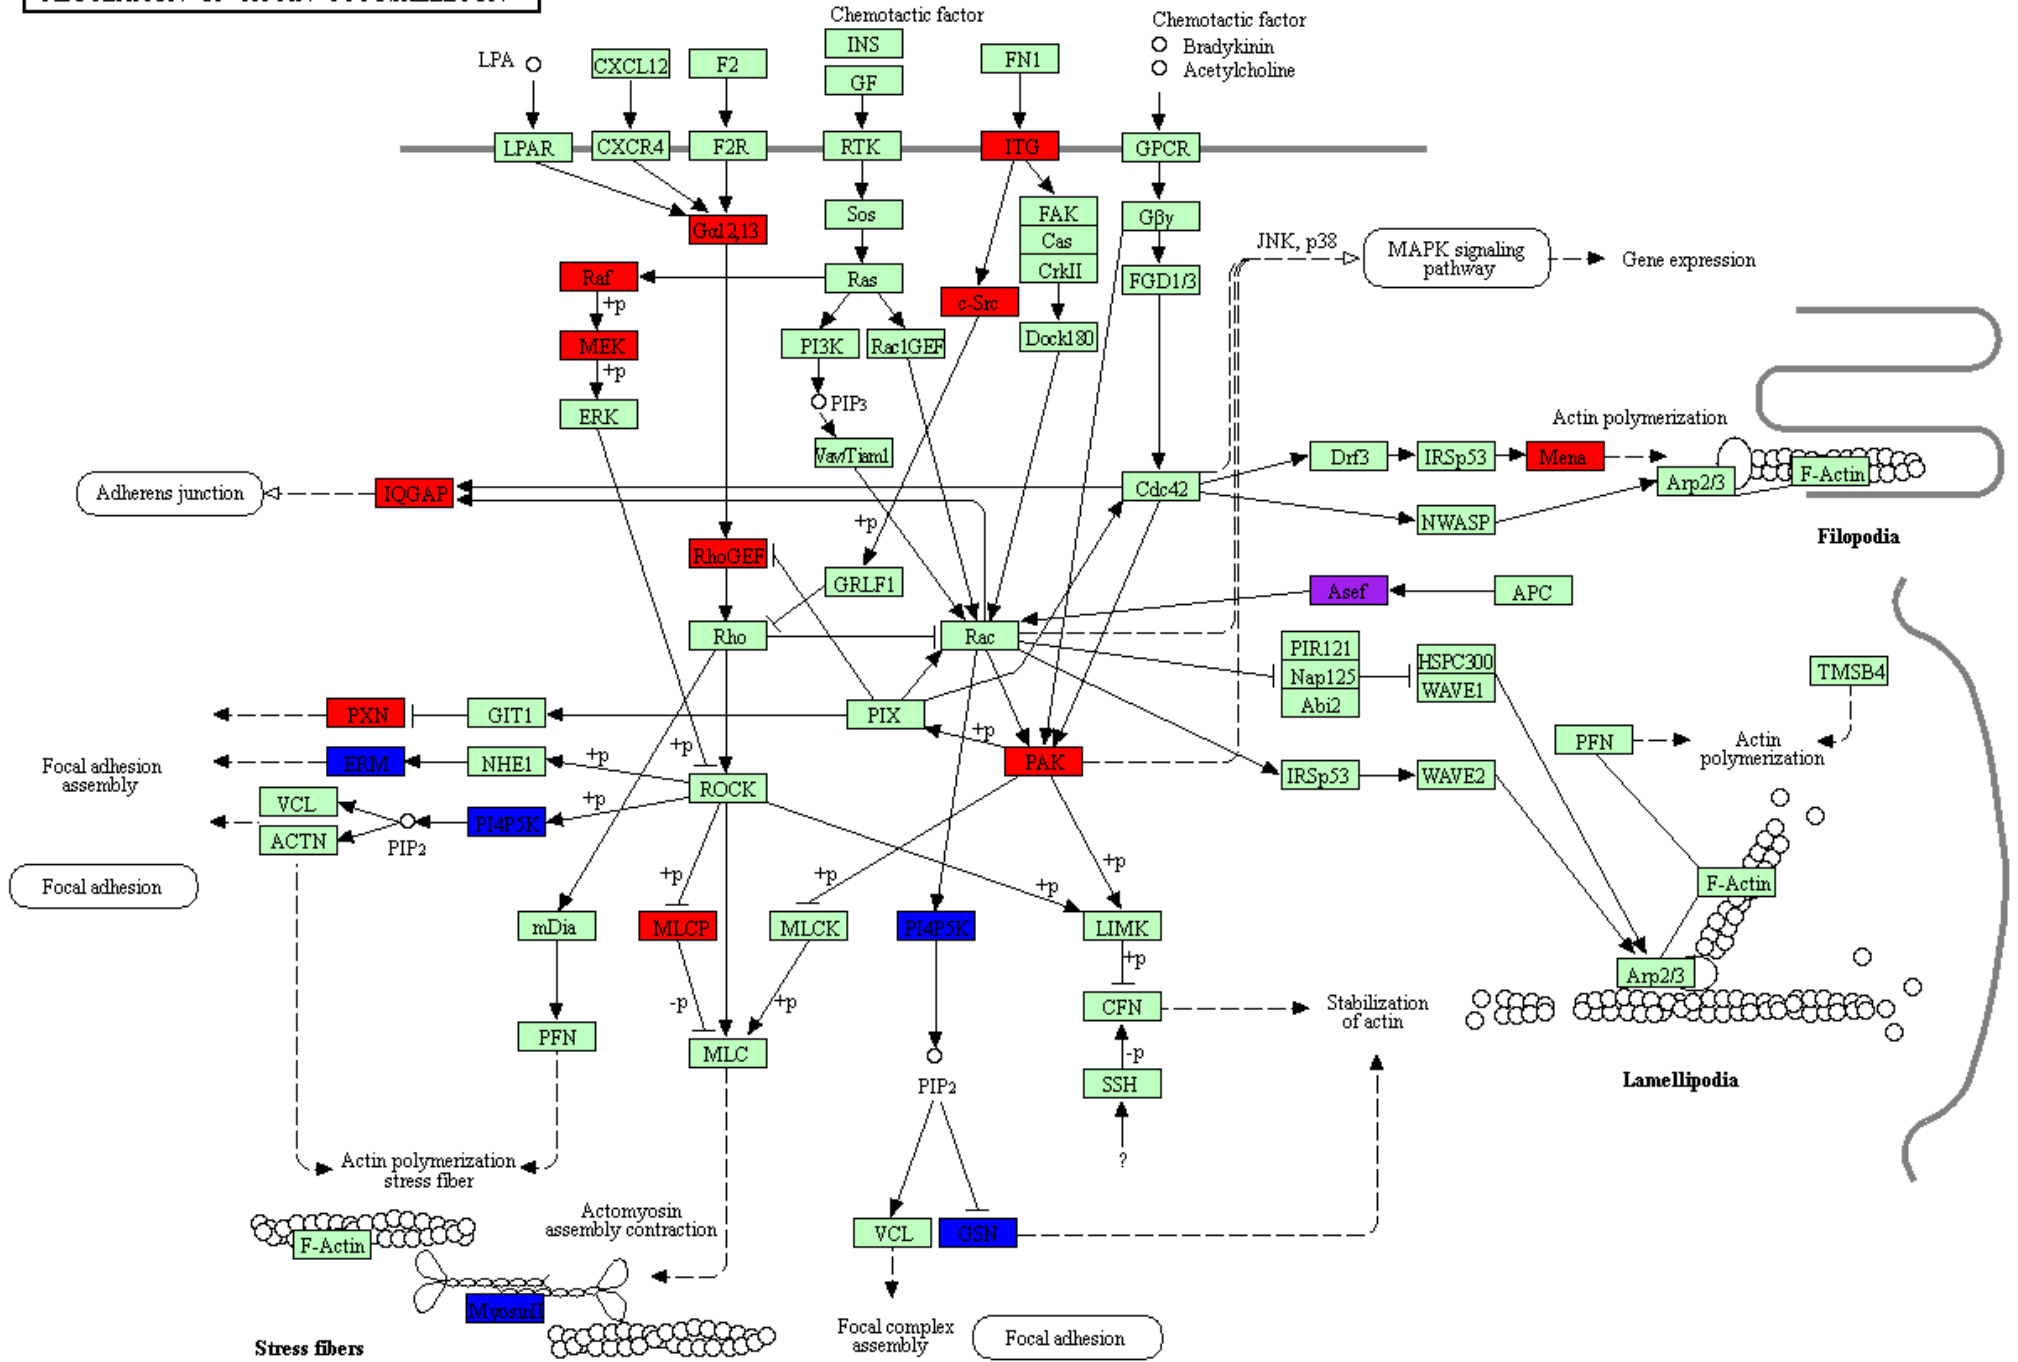



**cGMP-PKG SIGNALING PATHWAY**

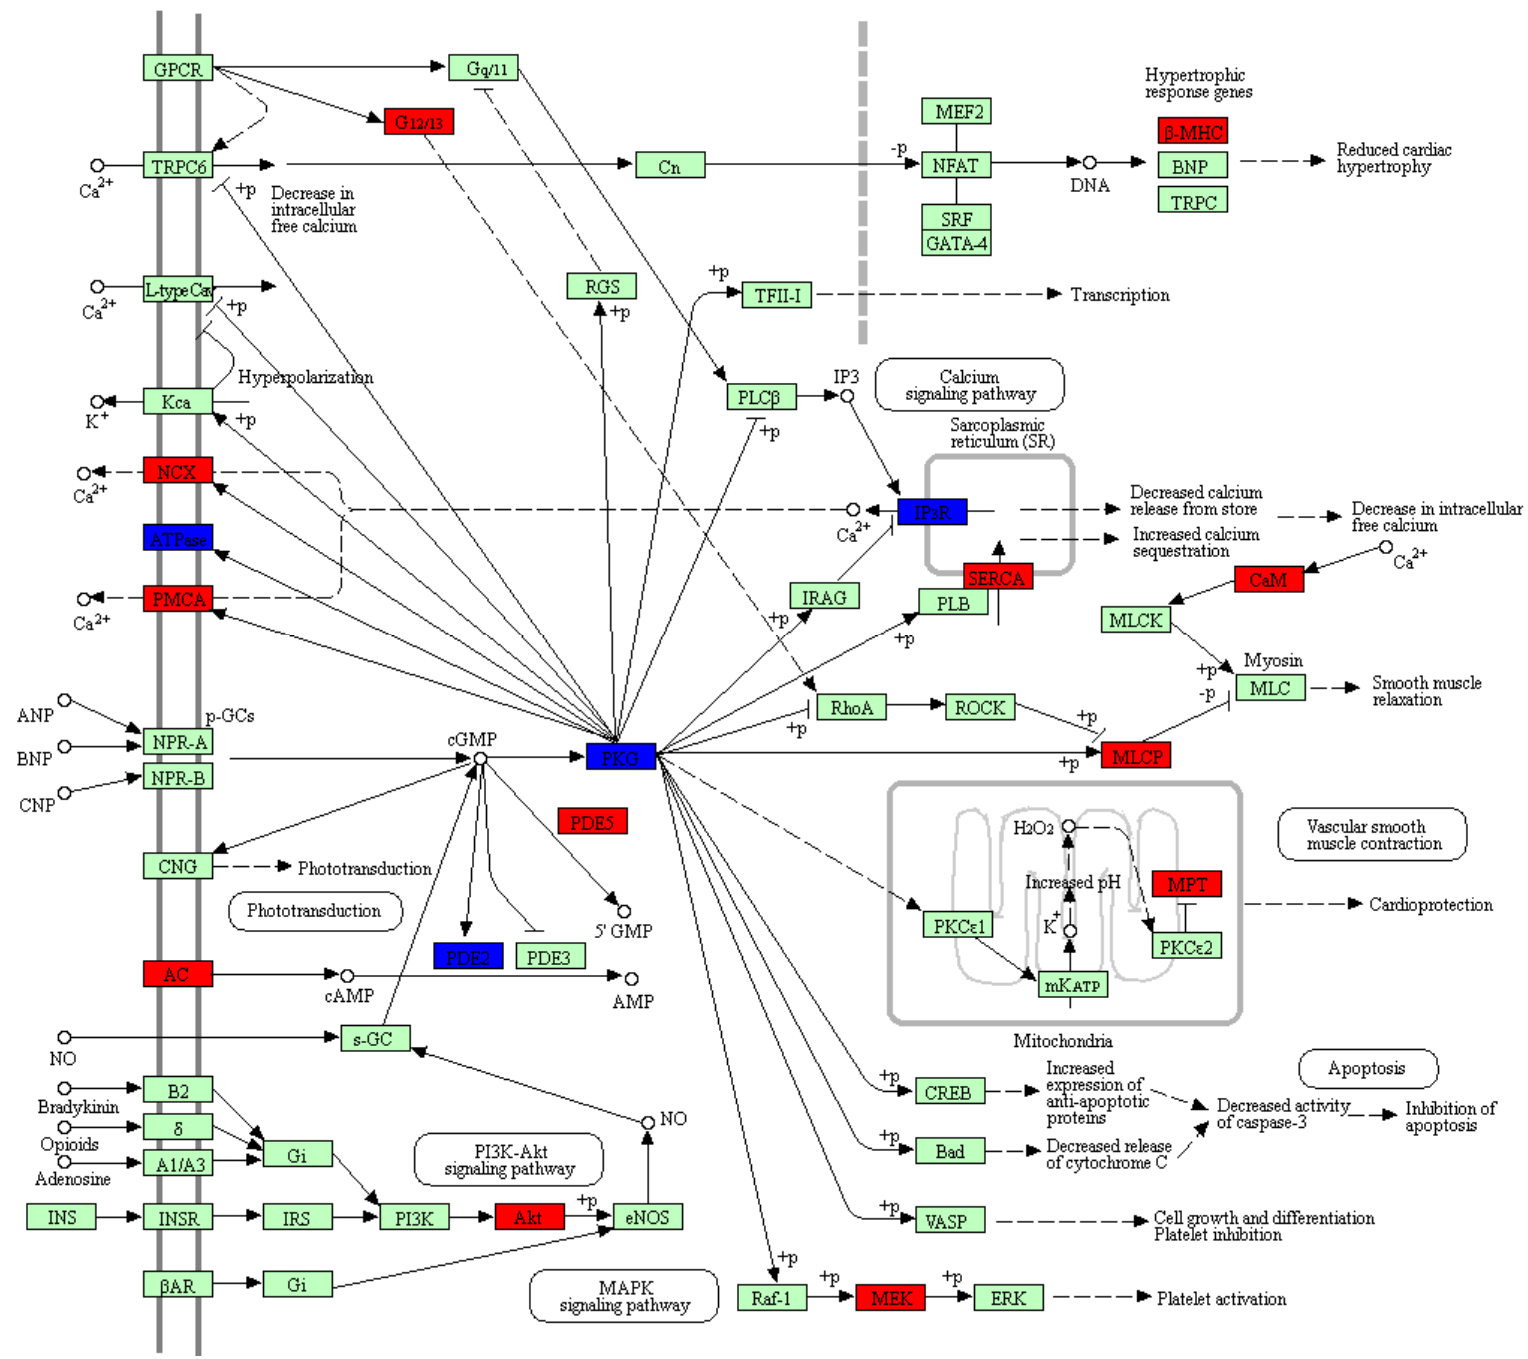

RETROGRADE ENDOCANNABINOID SIGNALING

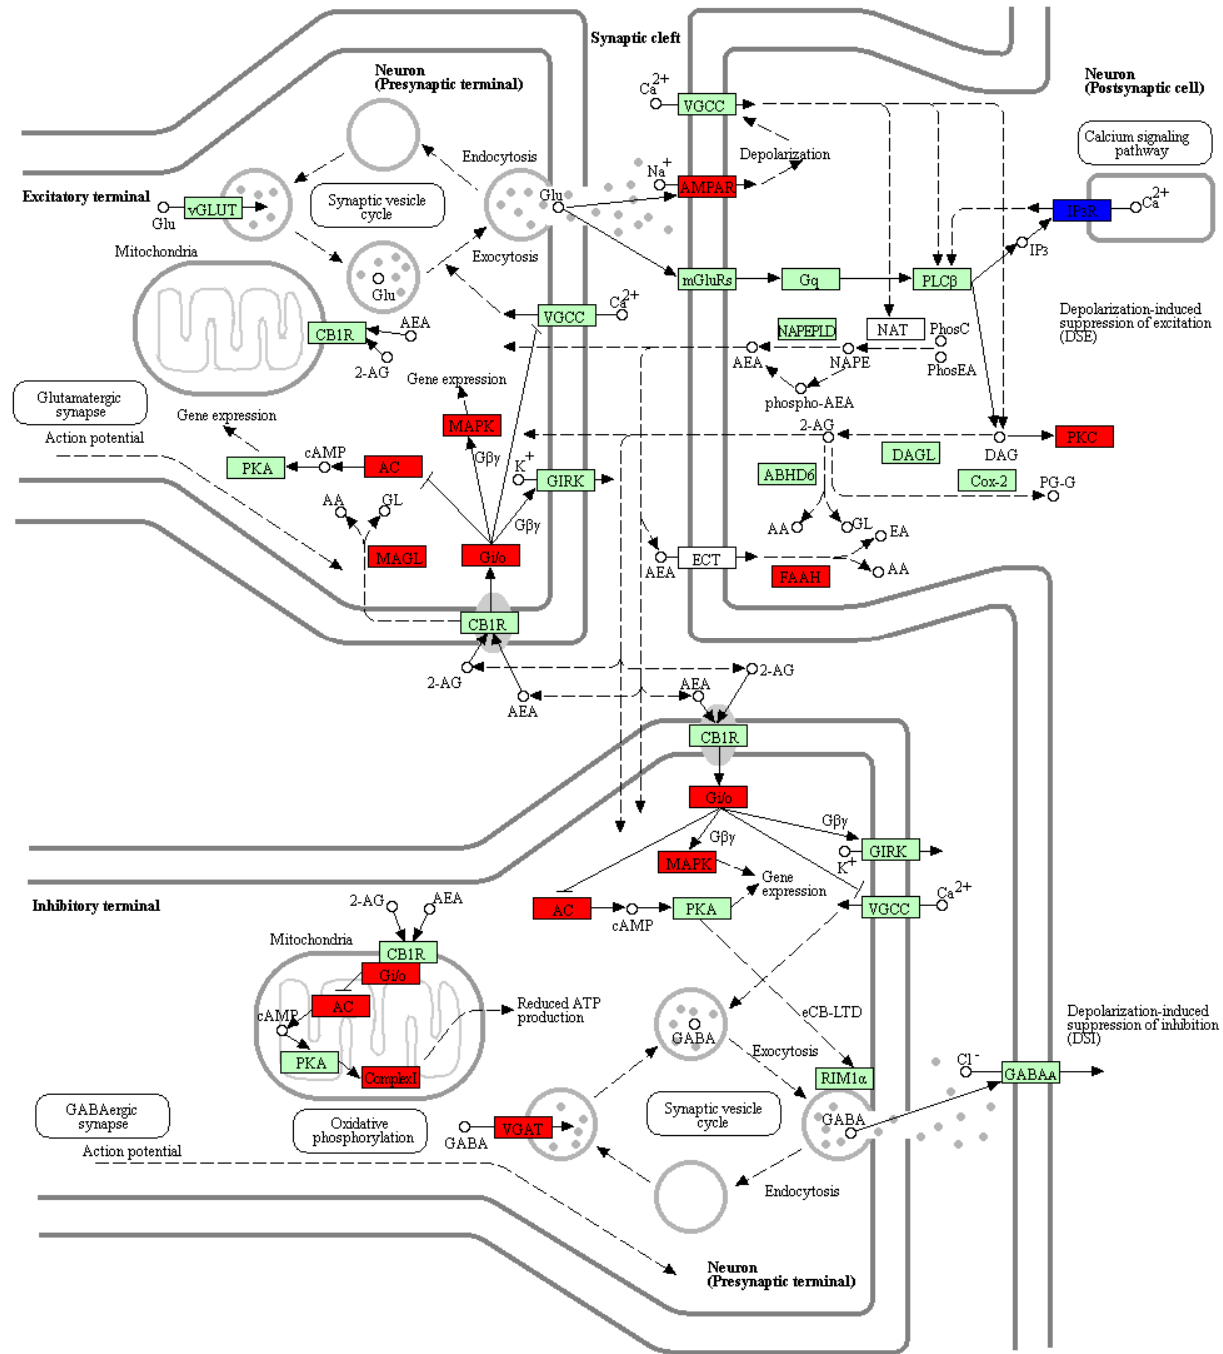



HORMONE SIGNALING PATHWAY

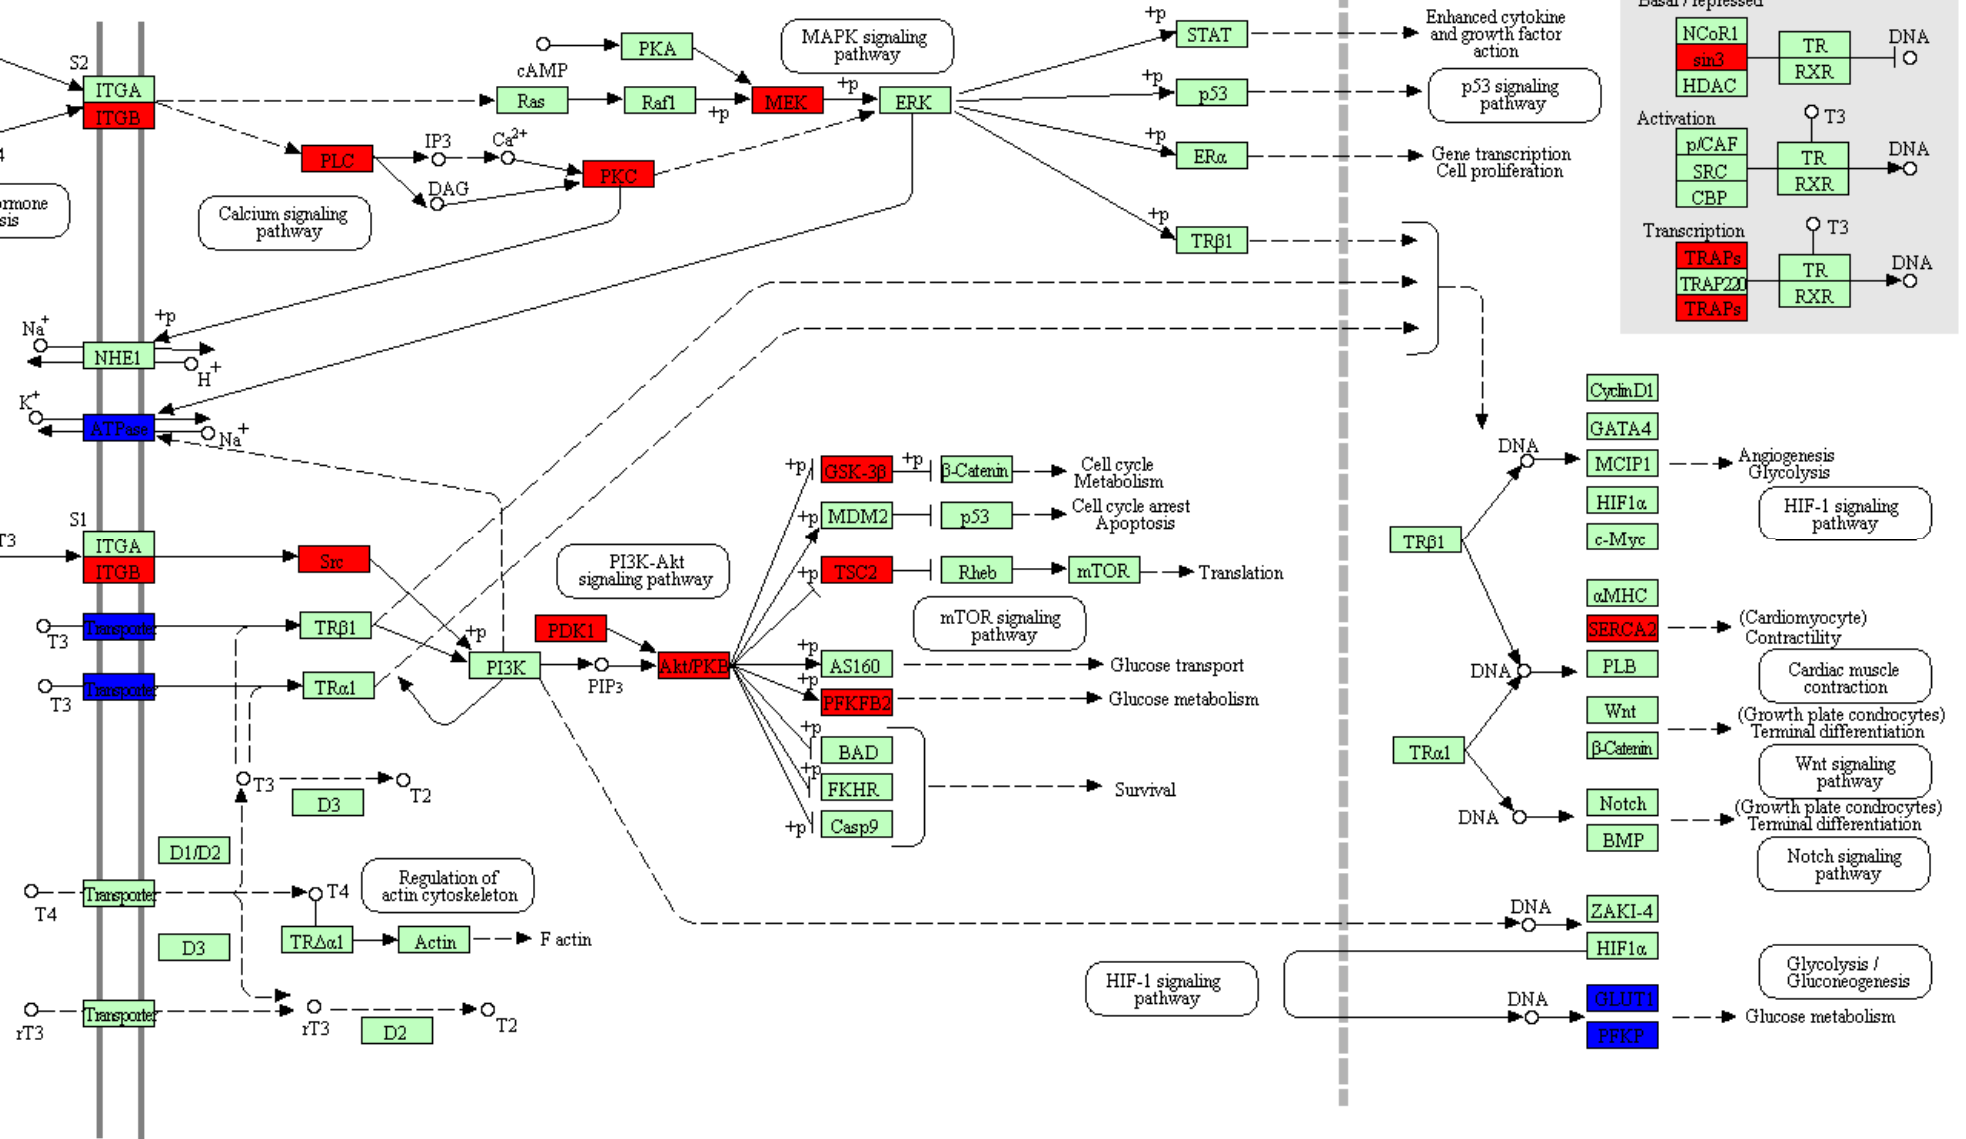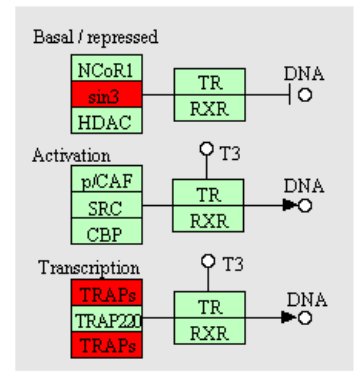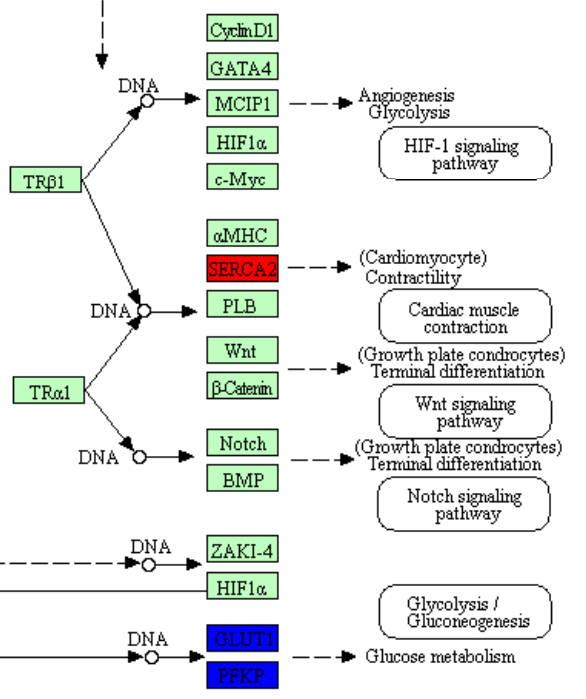

# ADRENERGIC SIGNALING IN CARDIOMYOCYTES

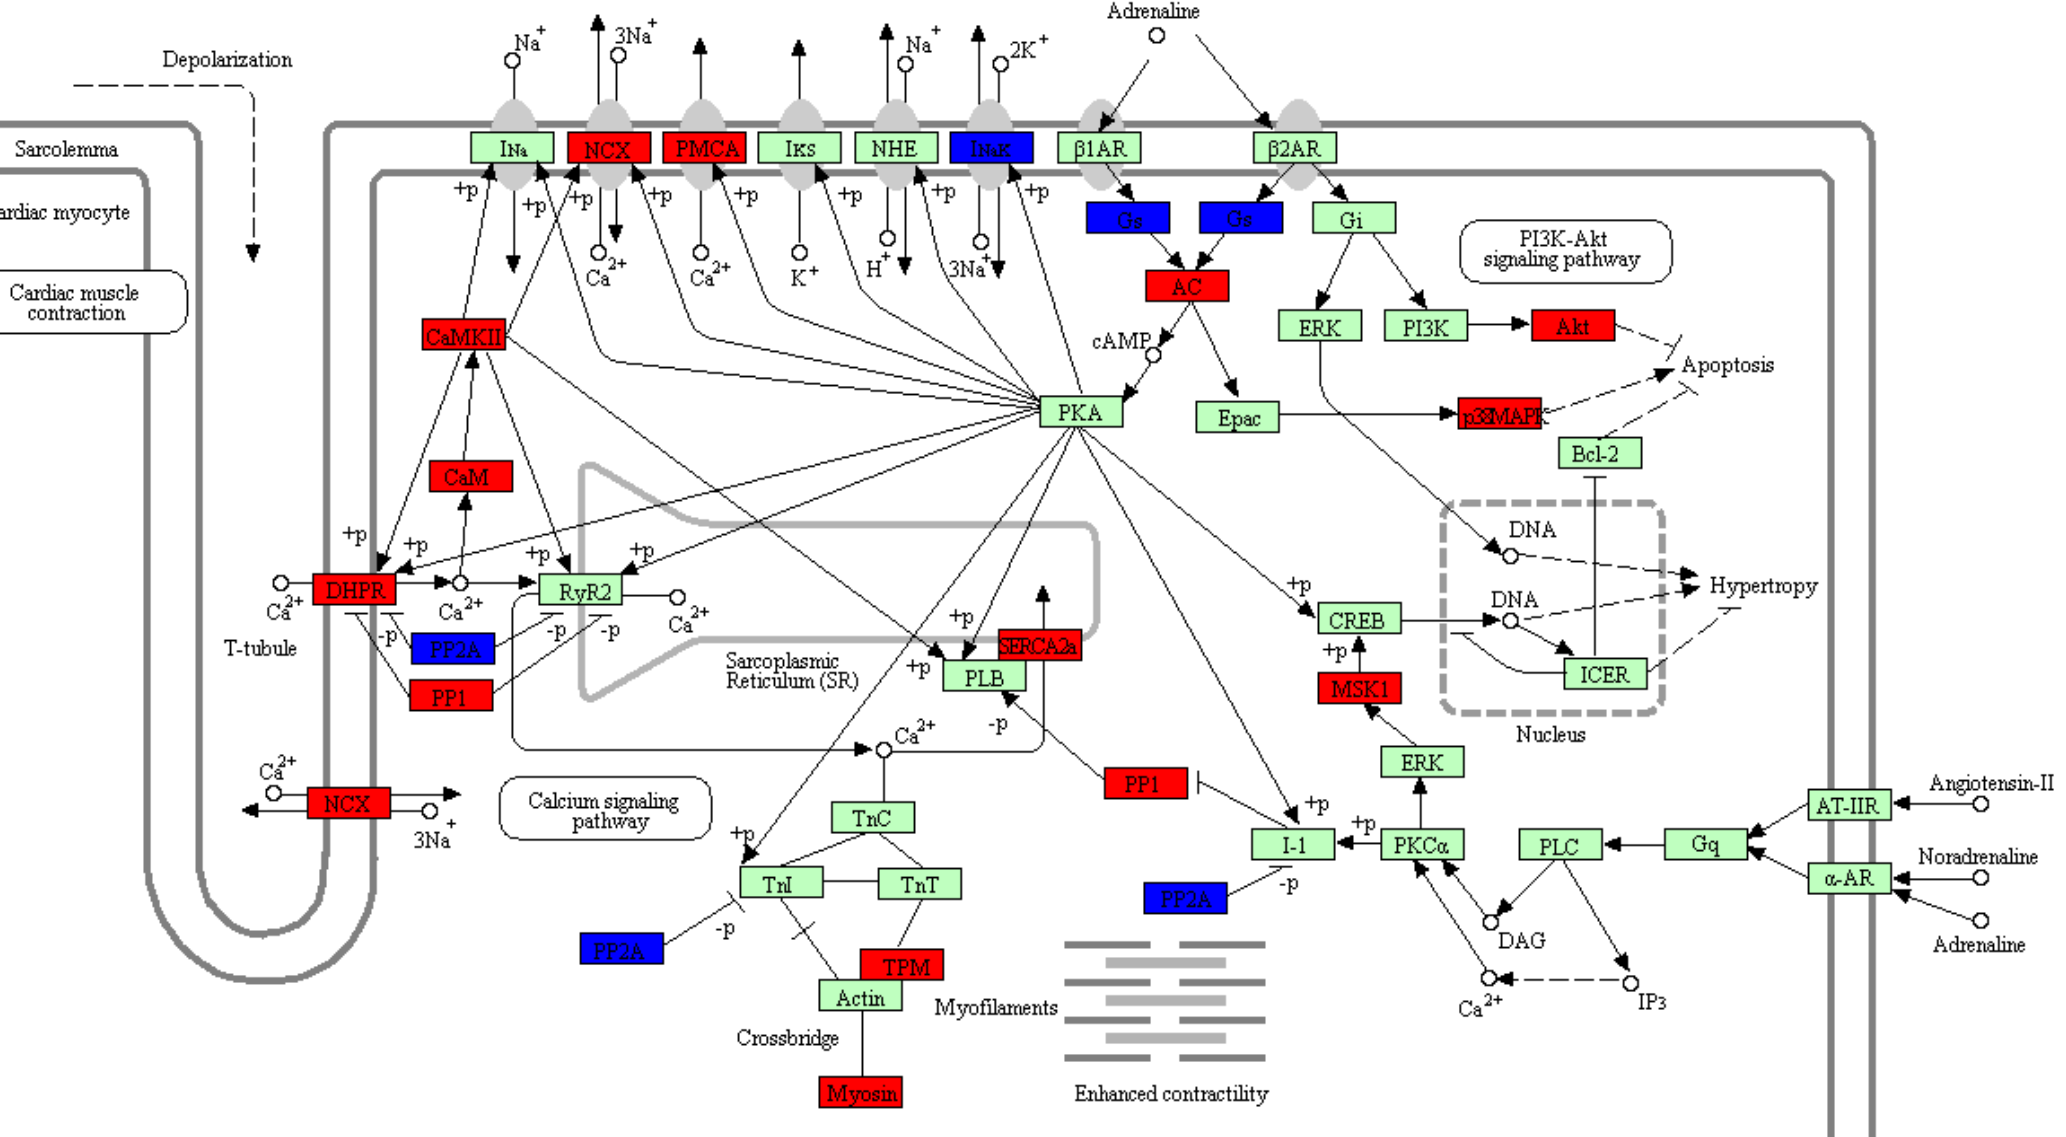

**PHAGOSOME**

**Conventional phagocytosis**

**ER-mediated phagocytosis**

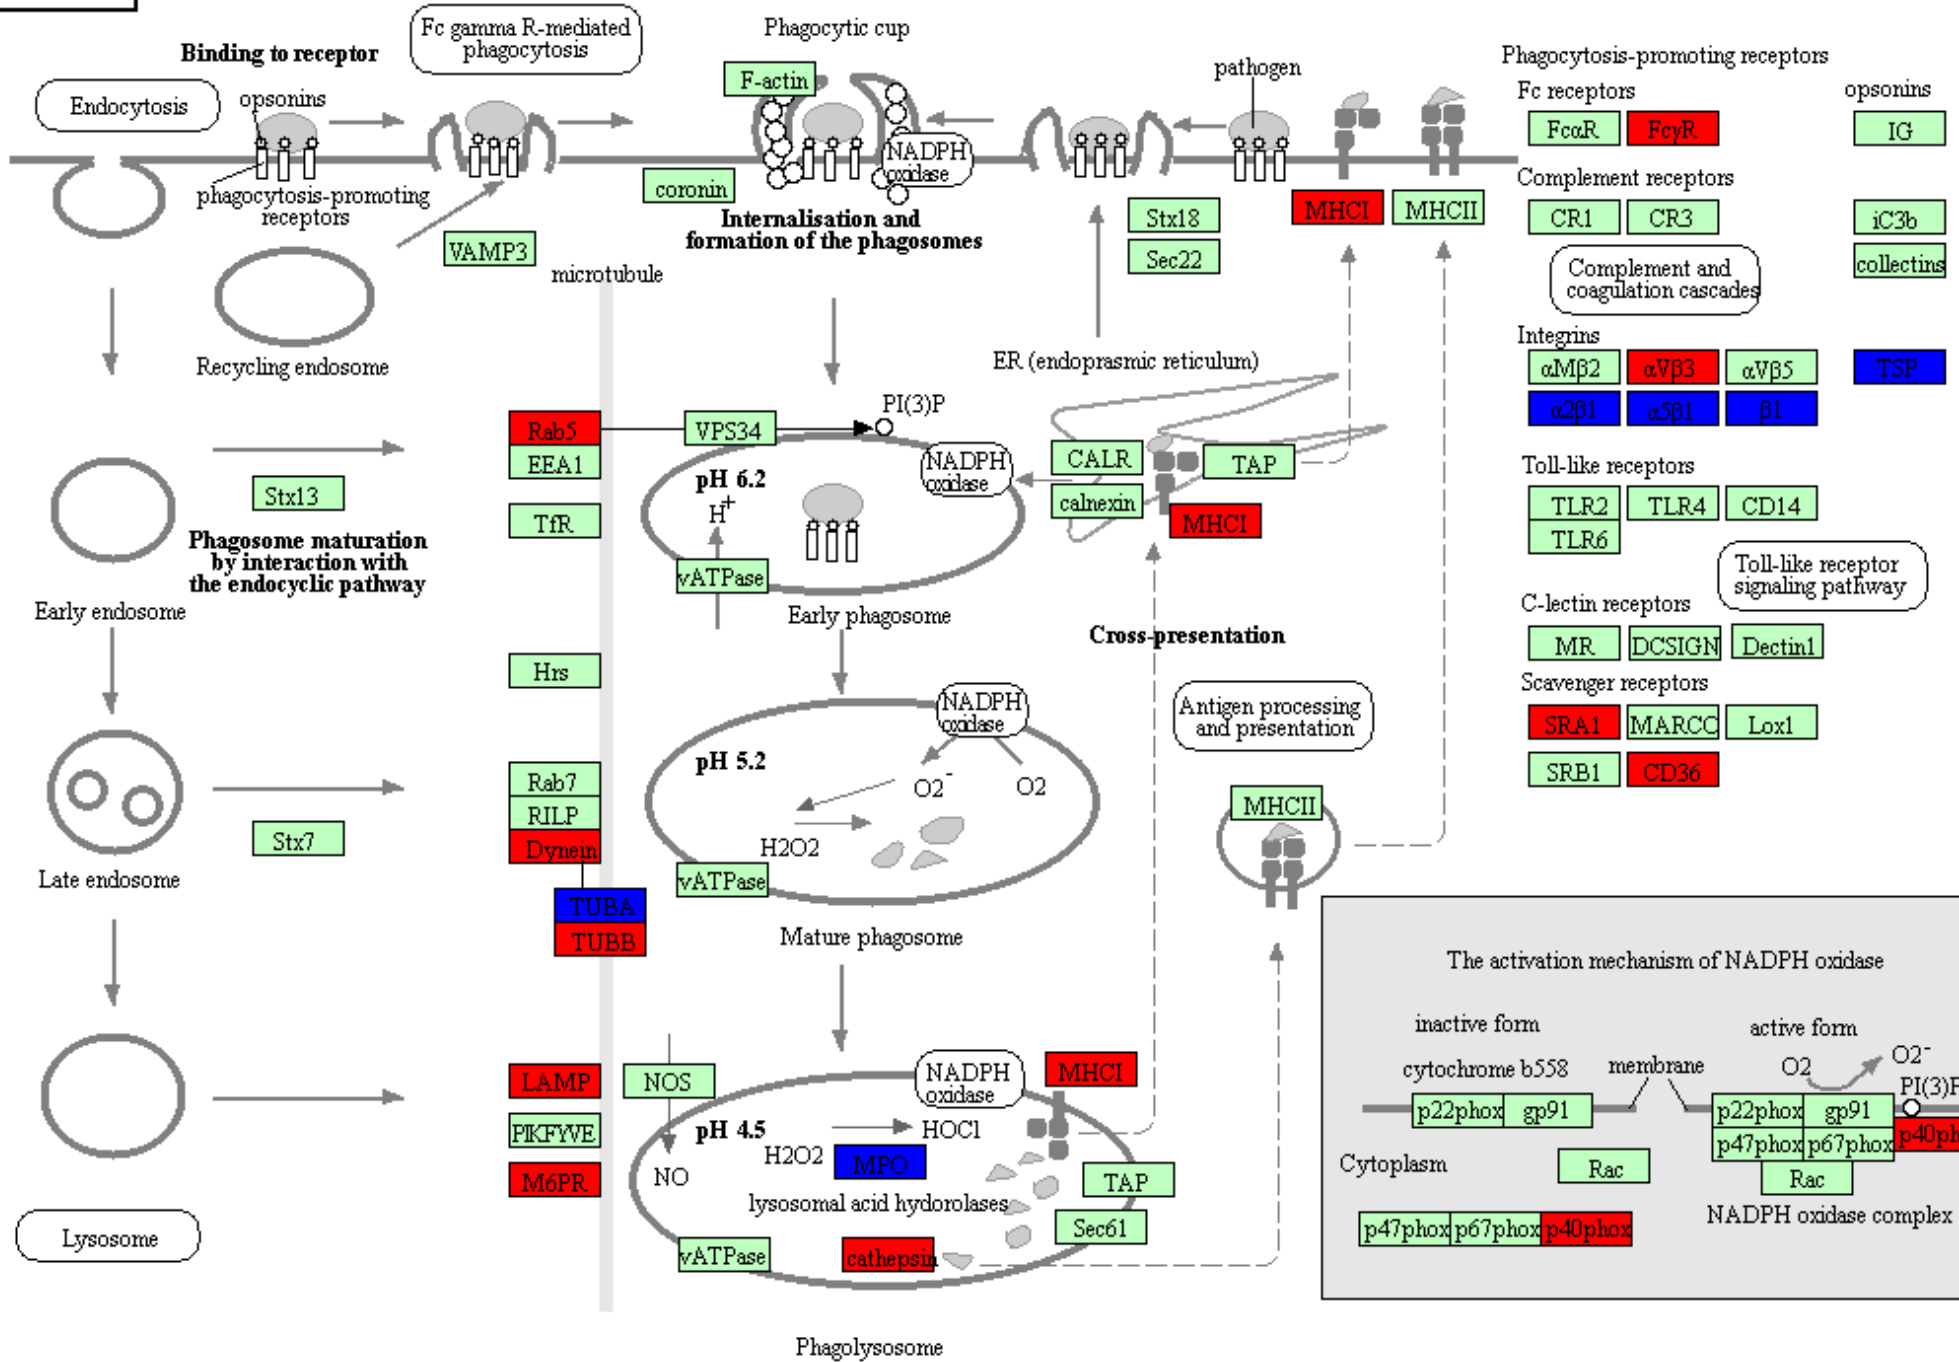

ECM-RECEPTOR INTERACTION

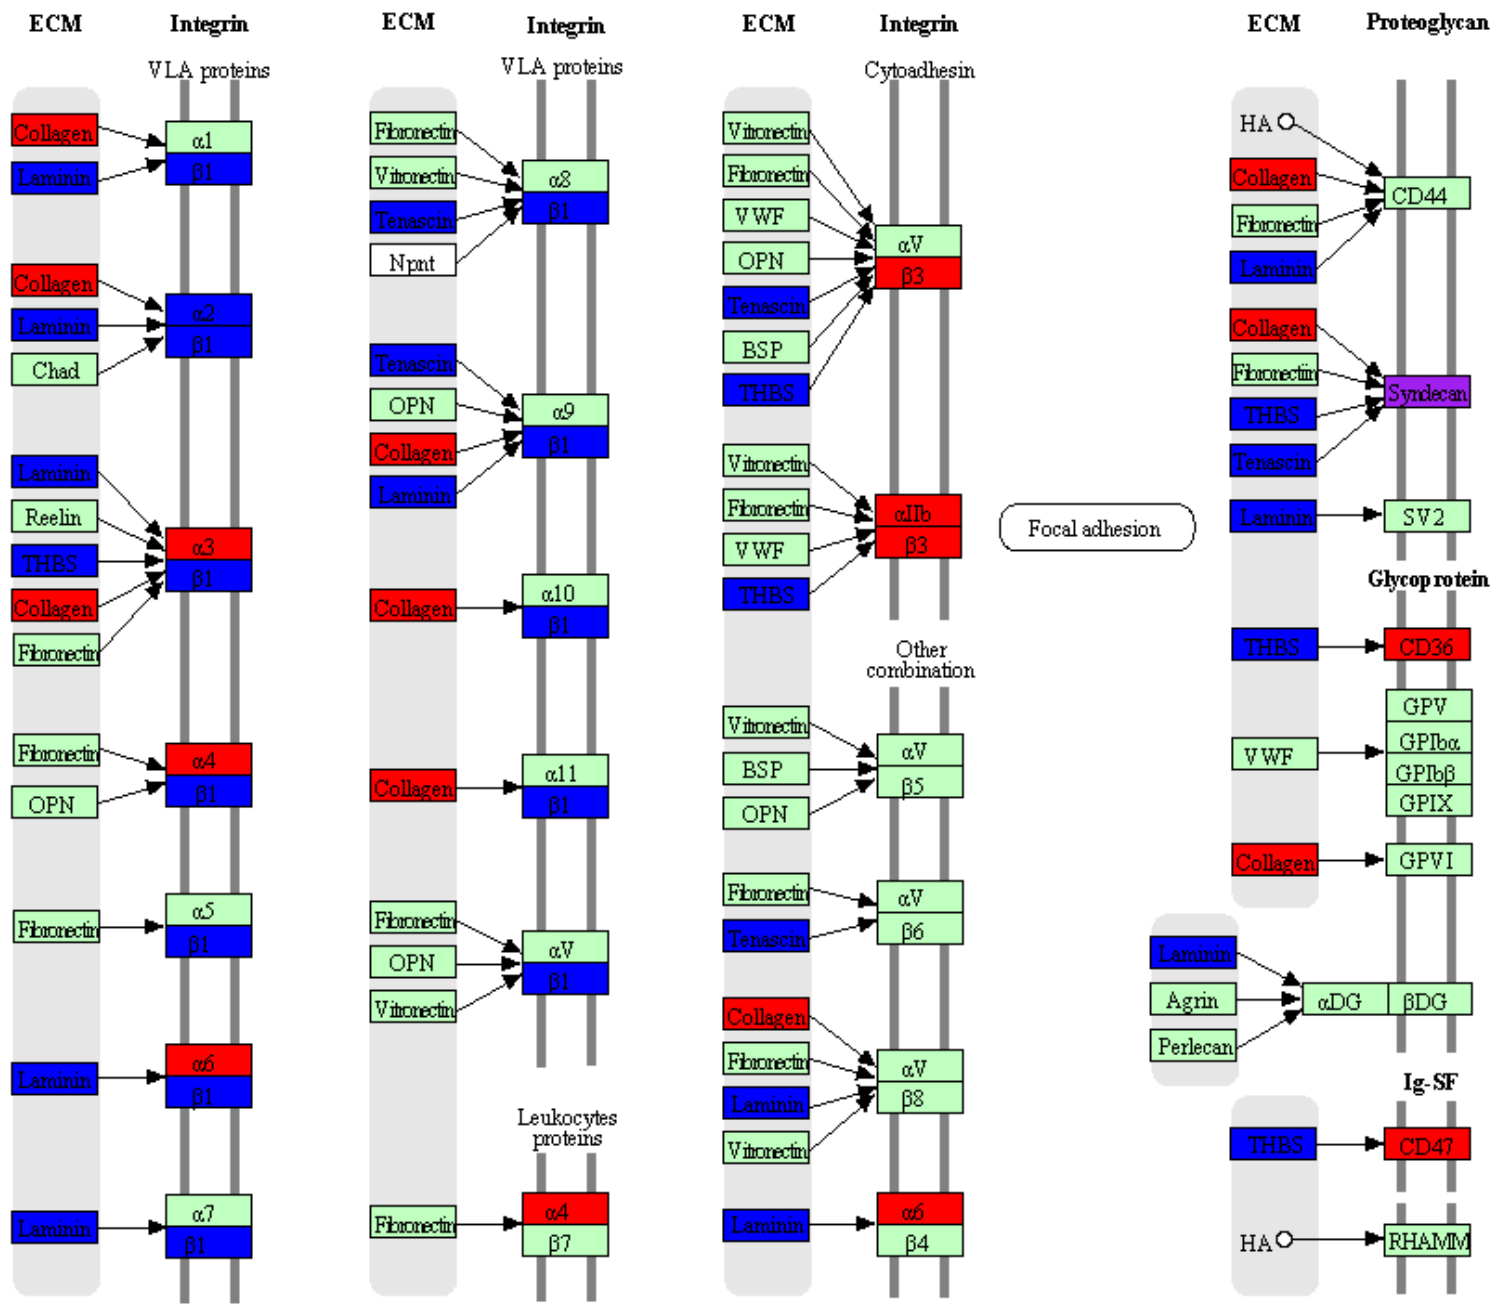





# INSULIN SIGNALING PATHWAY

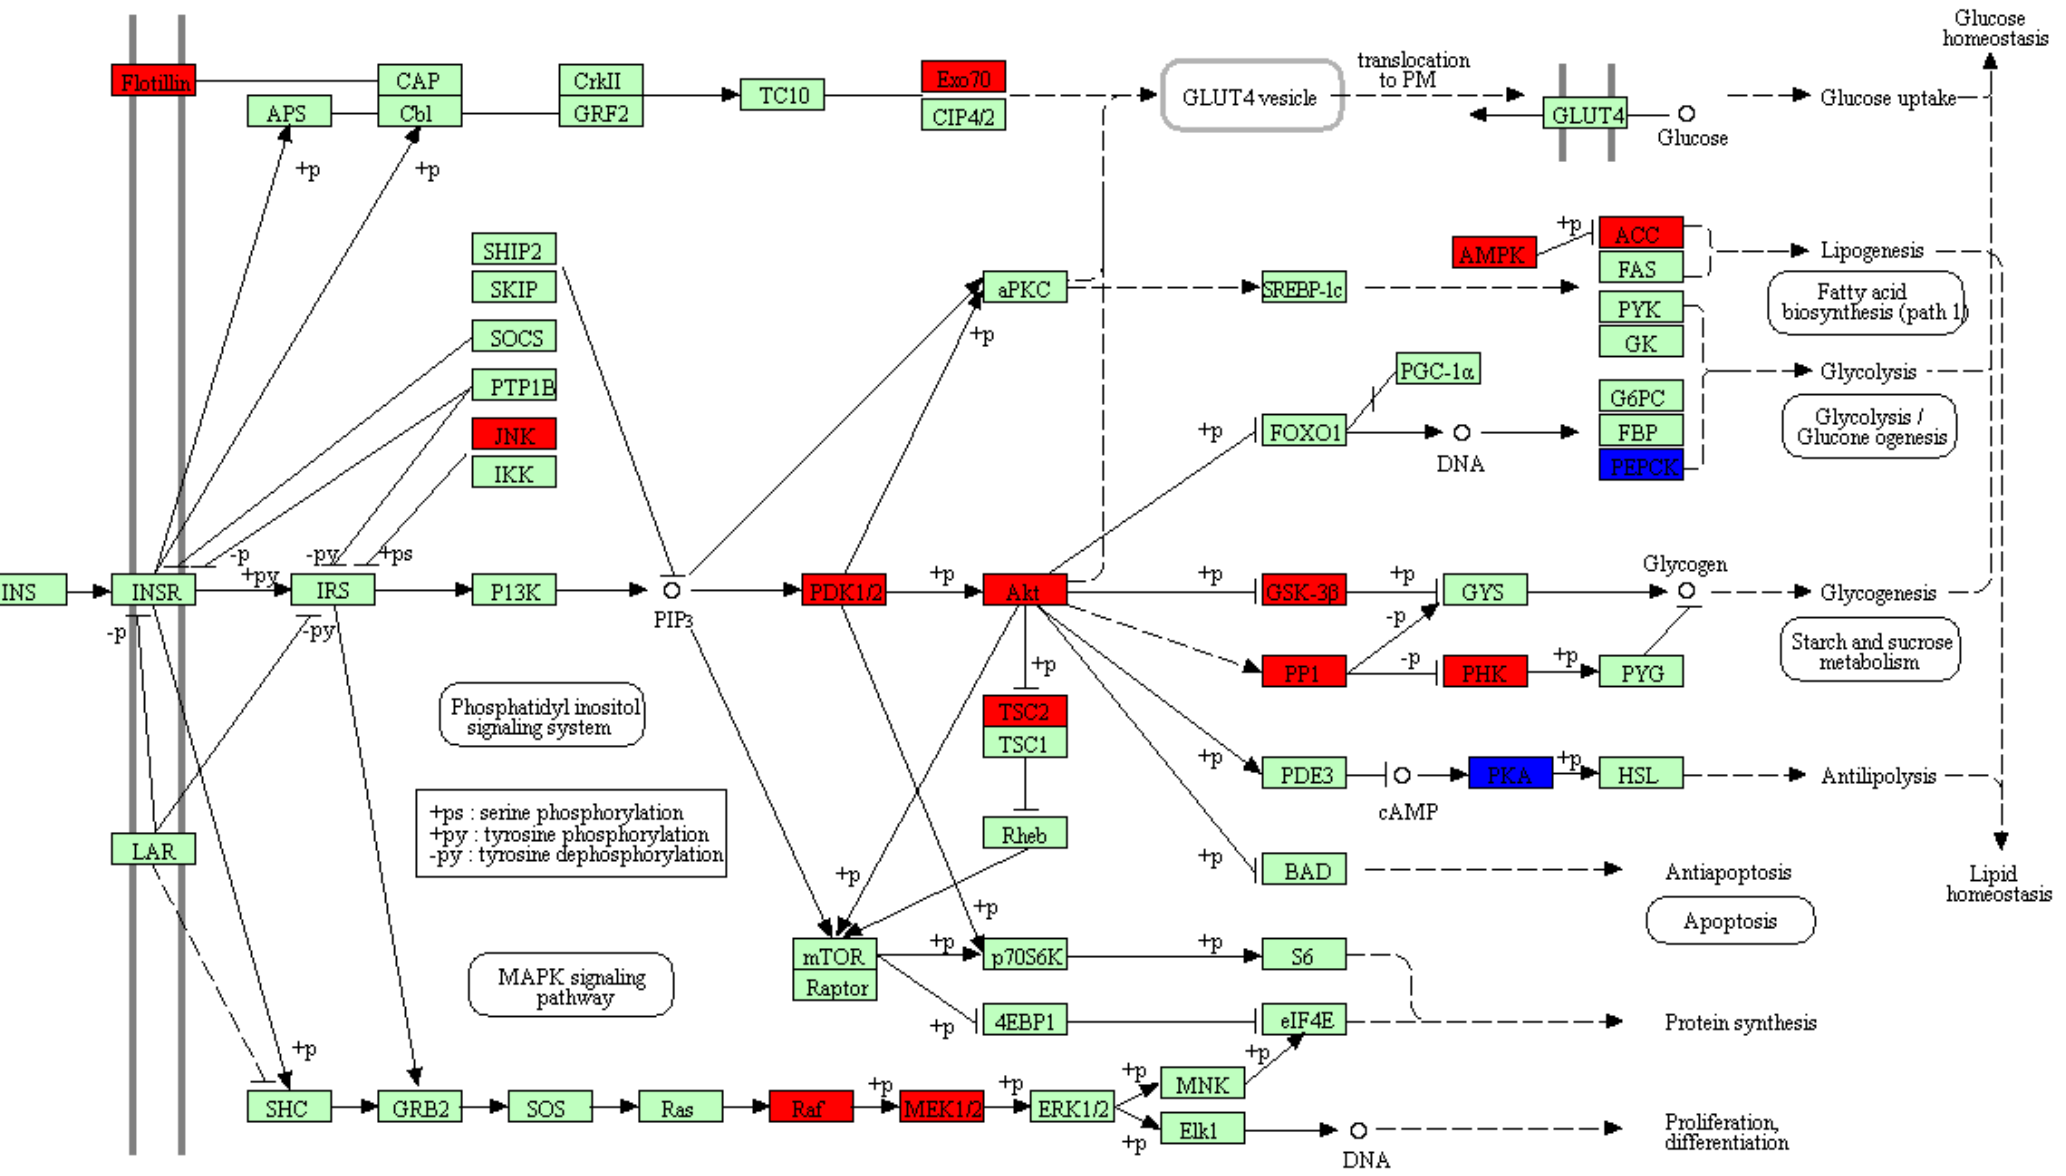

PPAR SIGNALING PATHWAY

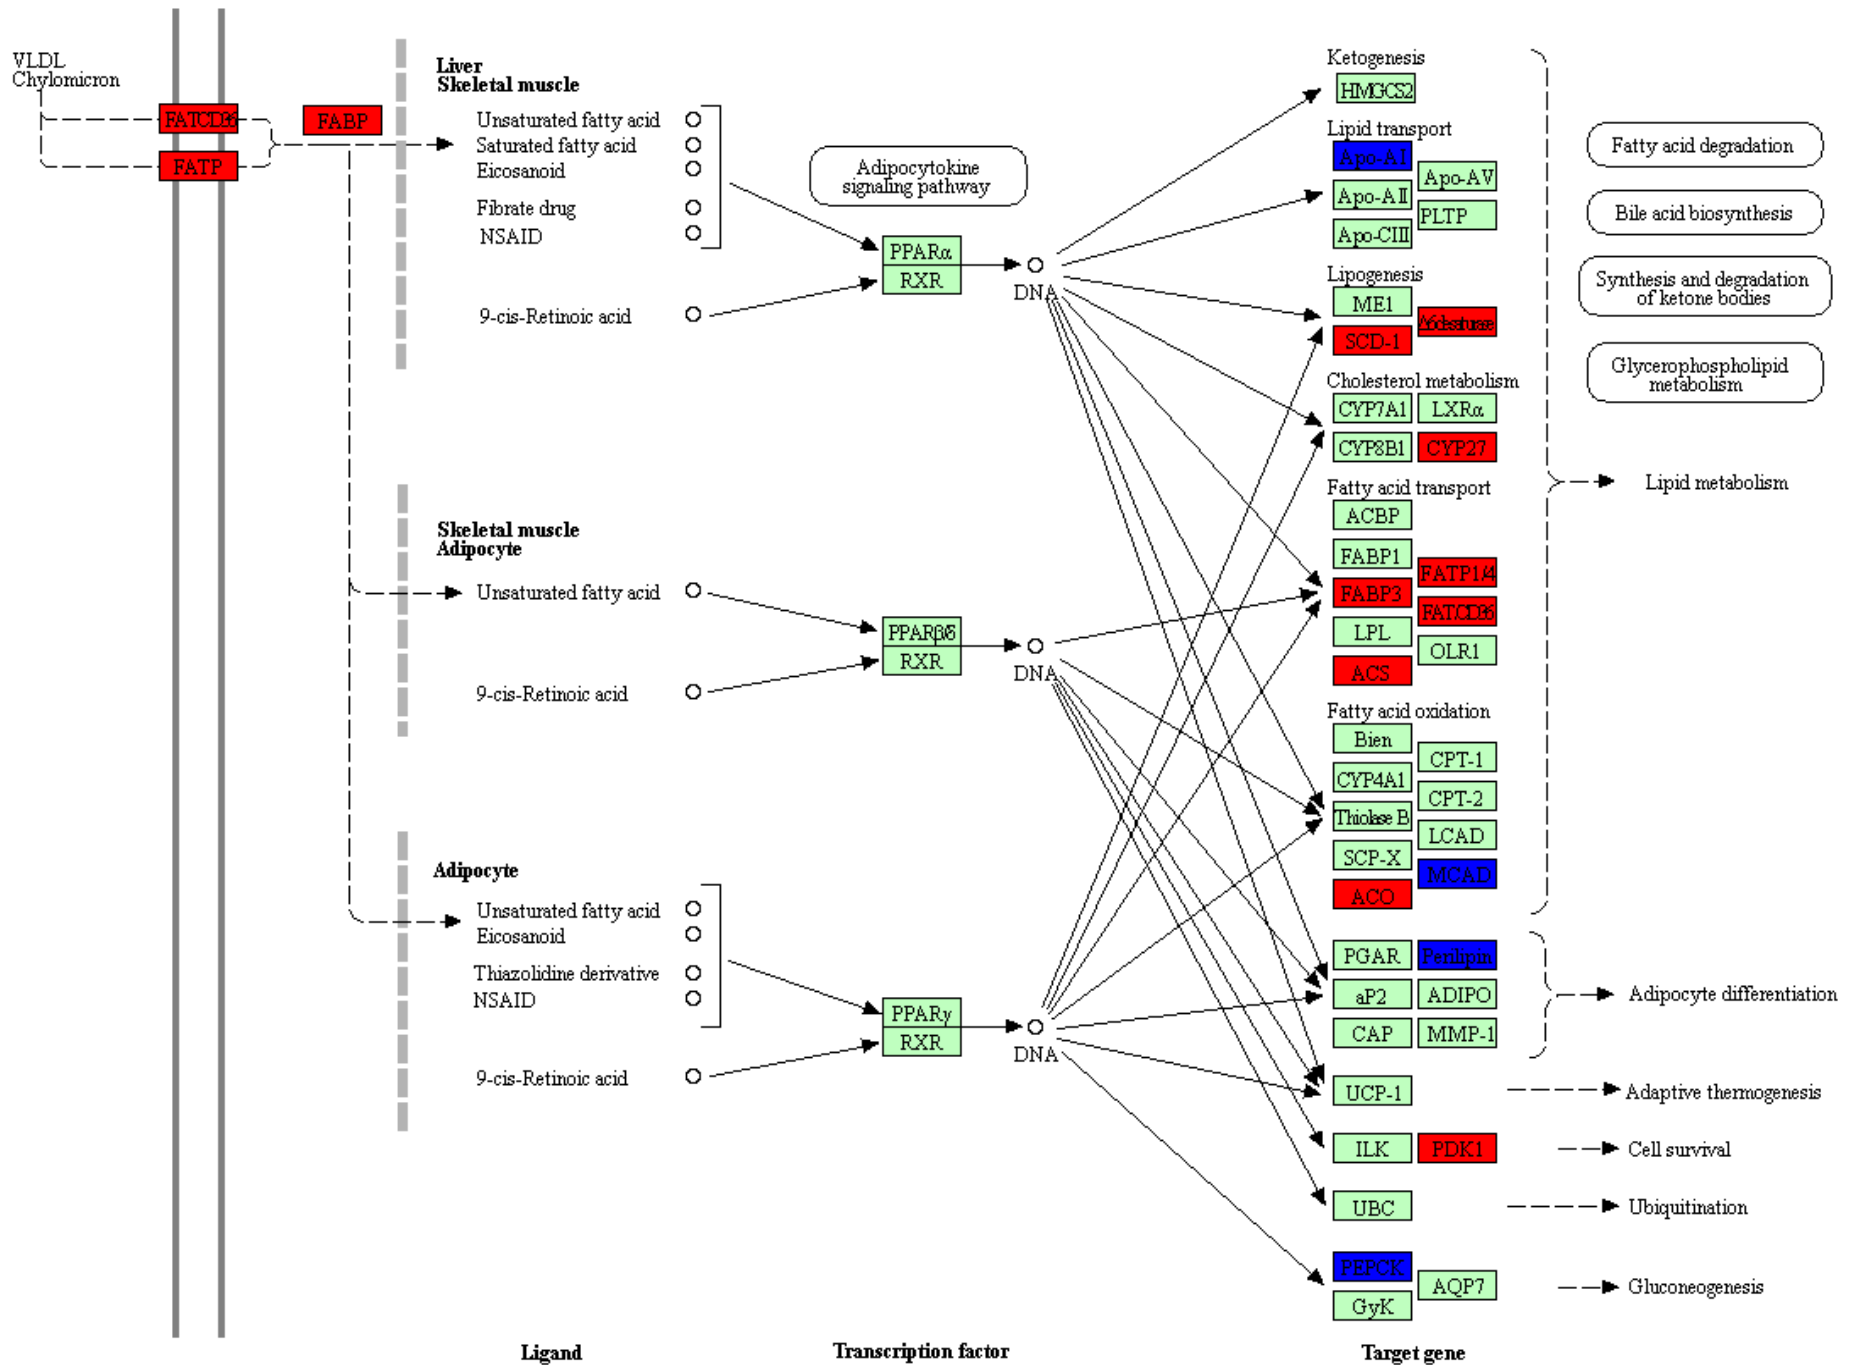

# NEUROTROPHIN SIGNALING PATHWAY

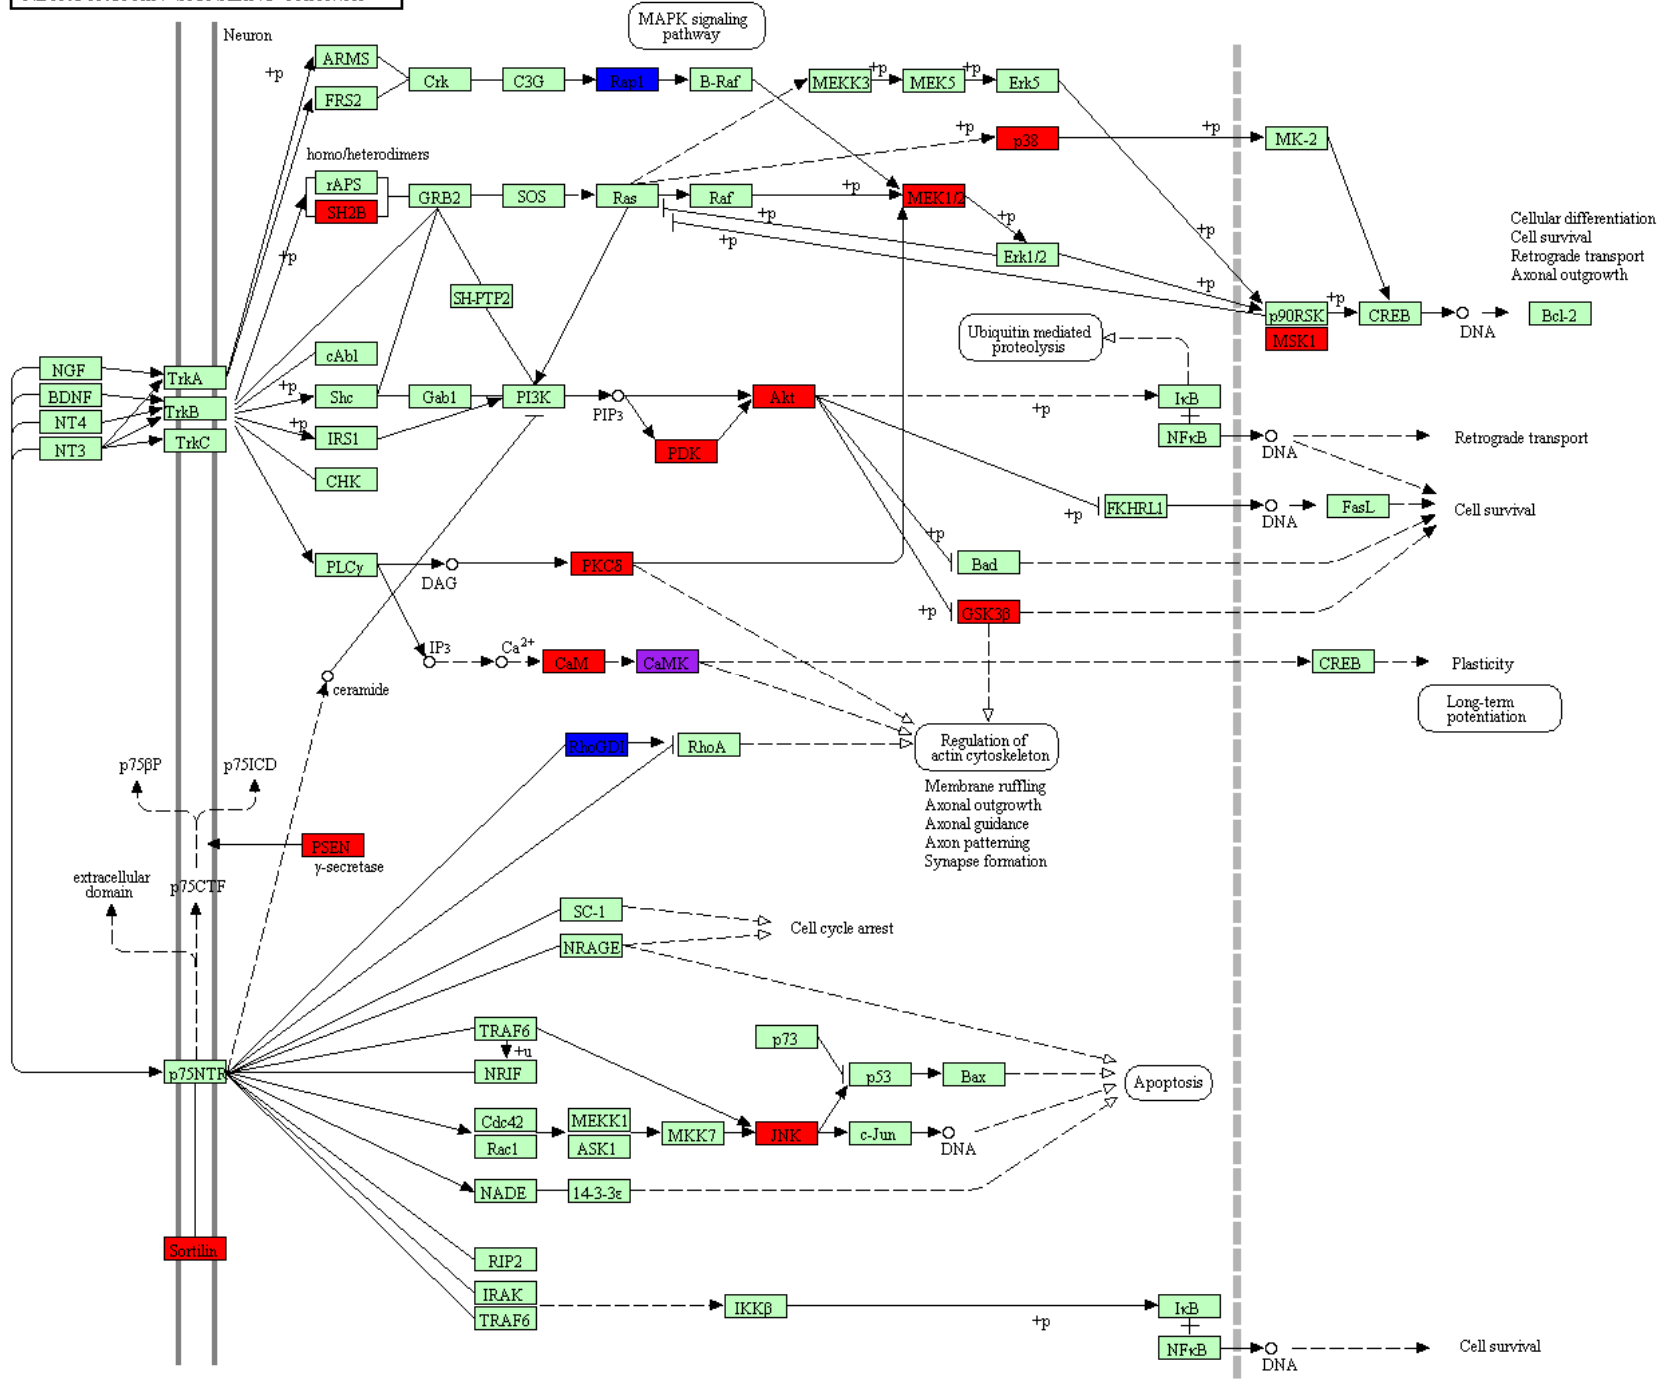

**ESTROGEN SIGNALING PATHWAY**

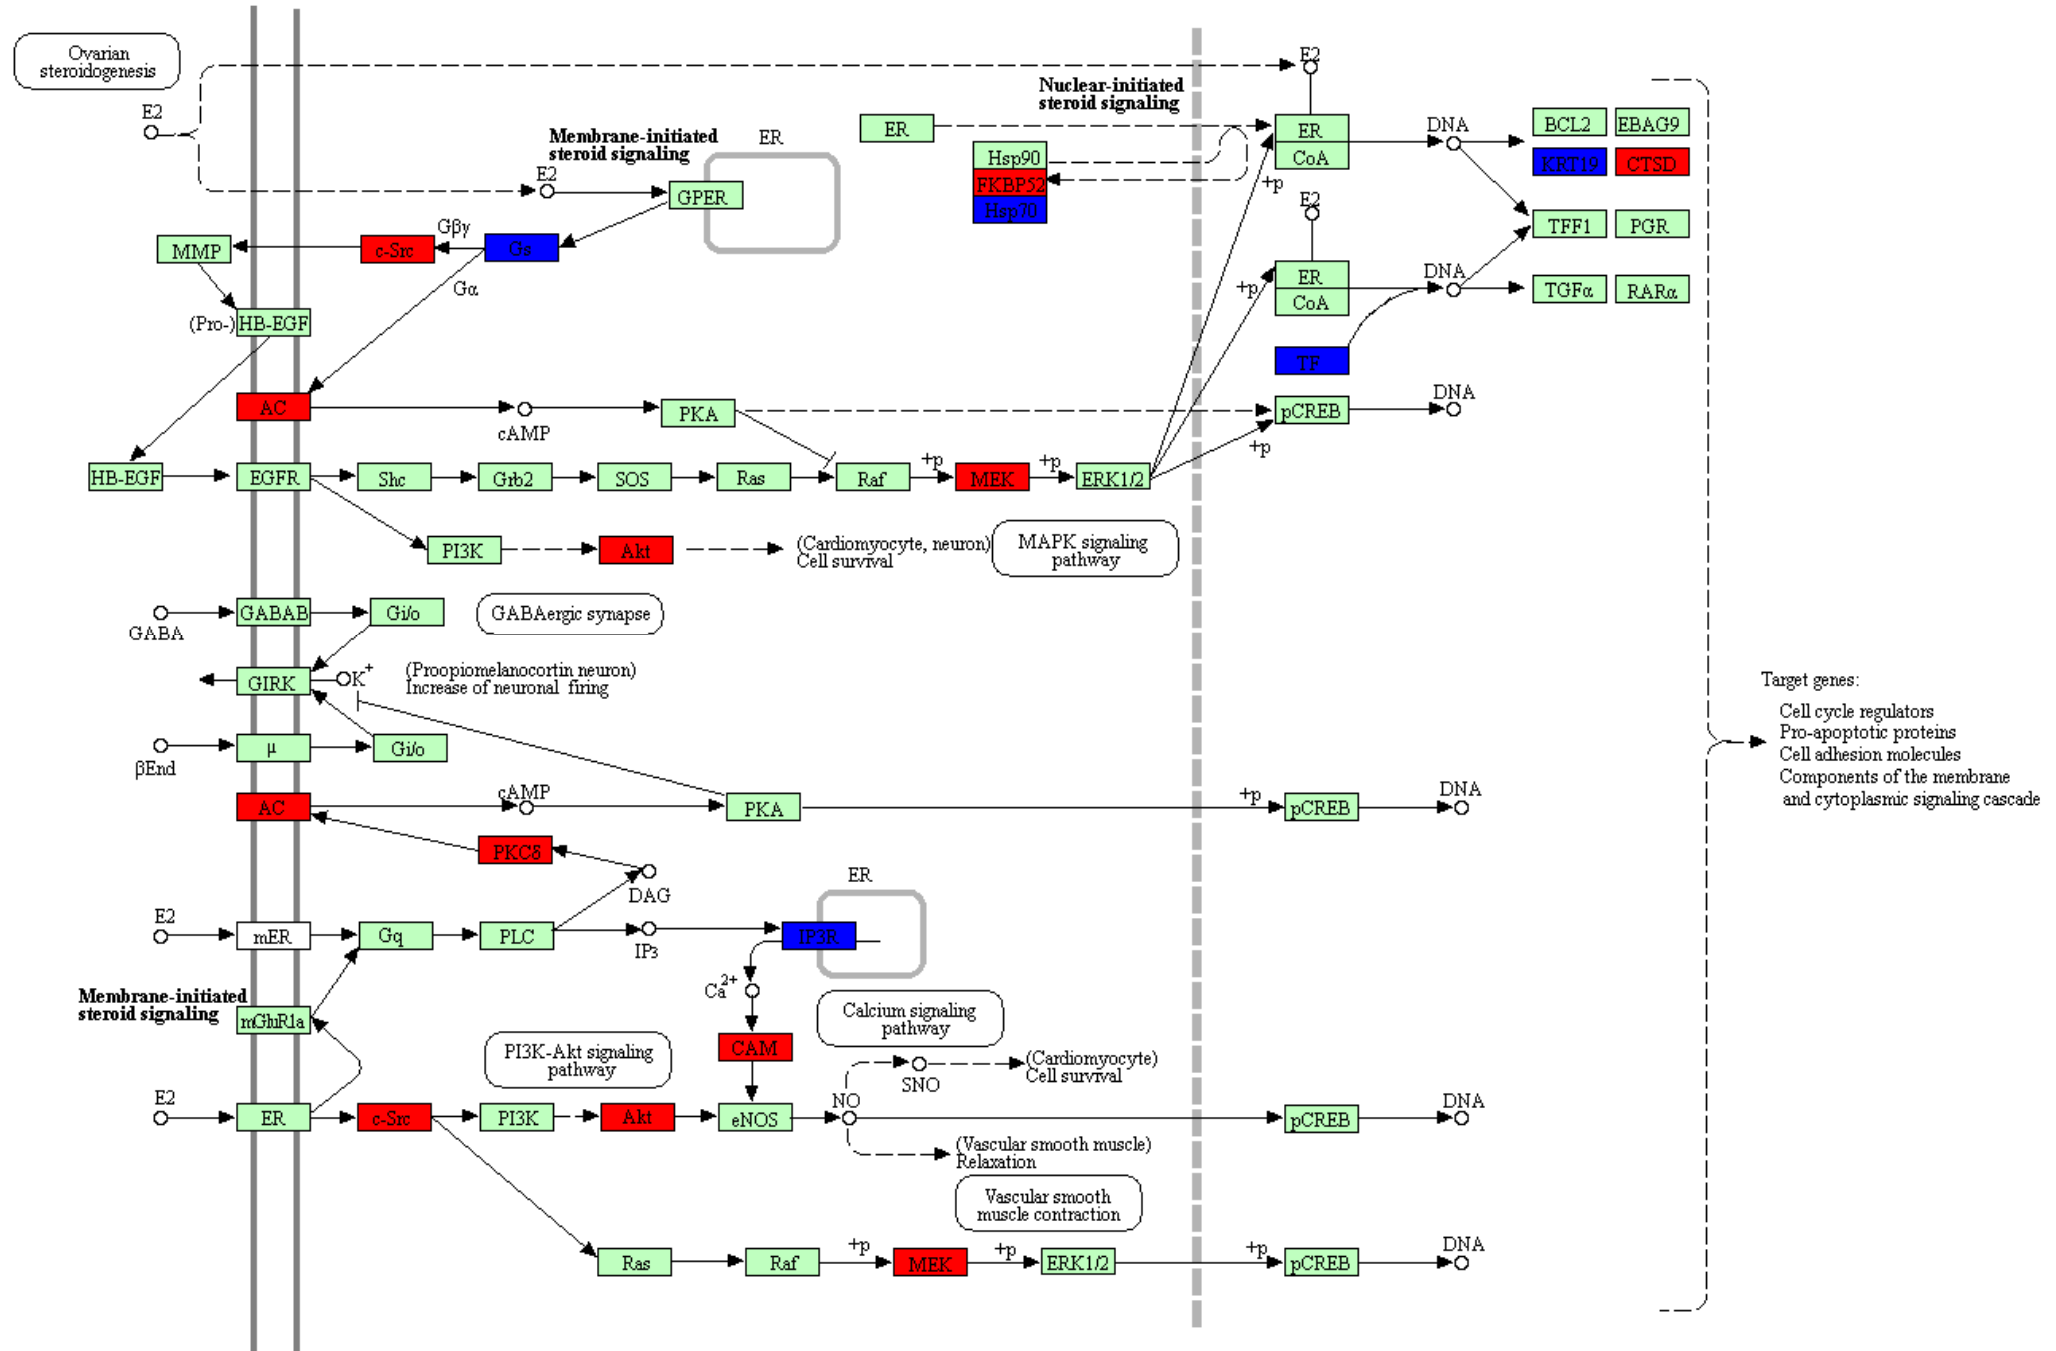

**DILATED CARDIOMYOPATHY (DCM)**

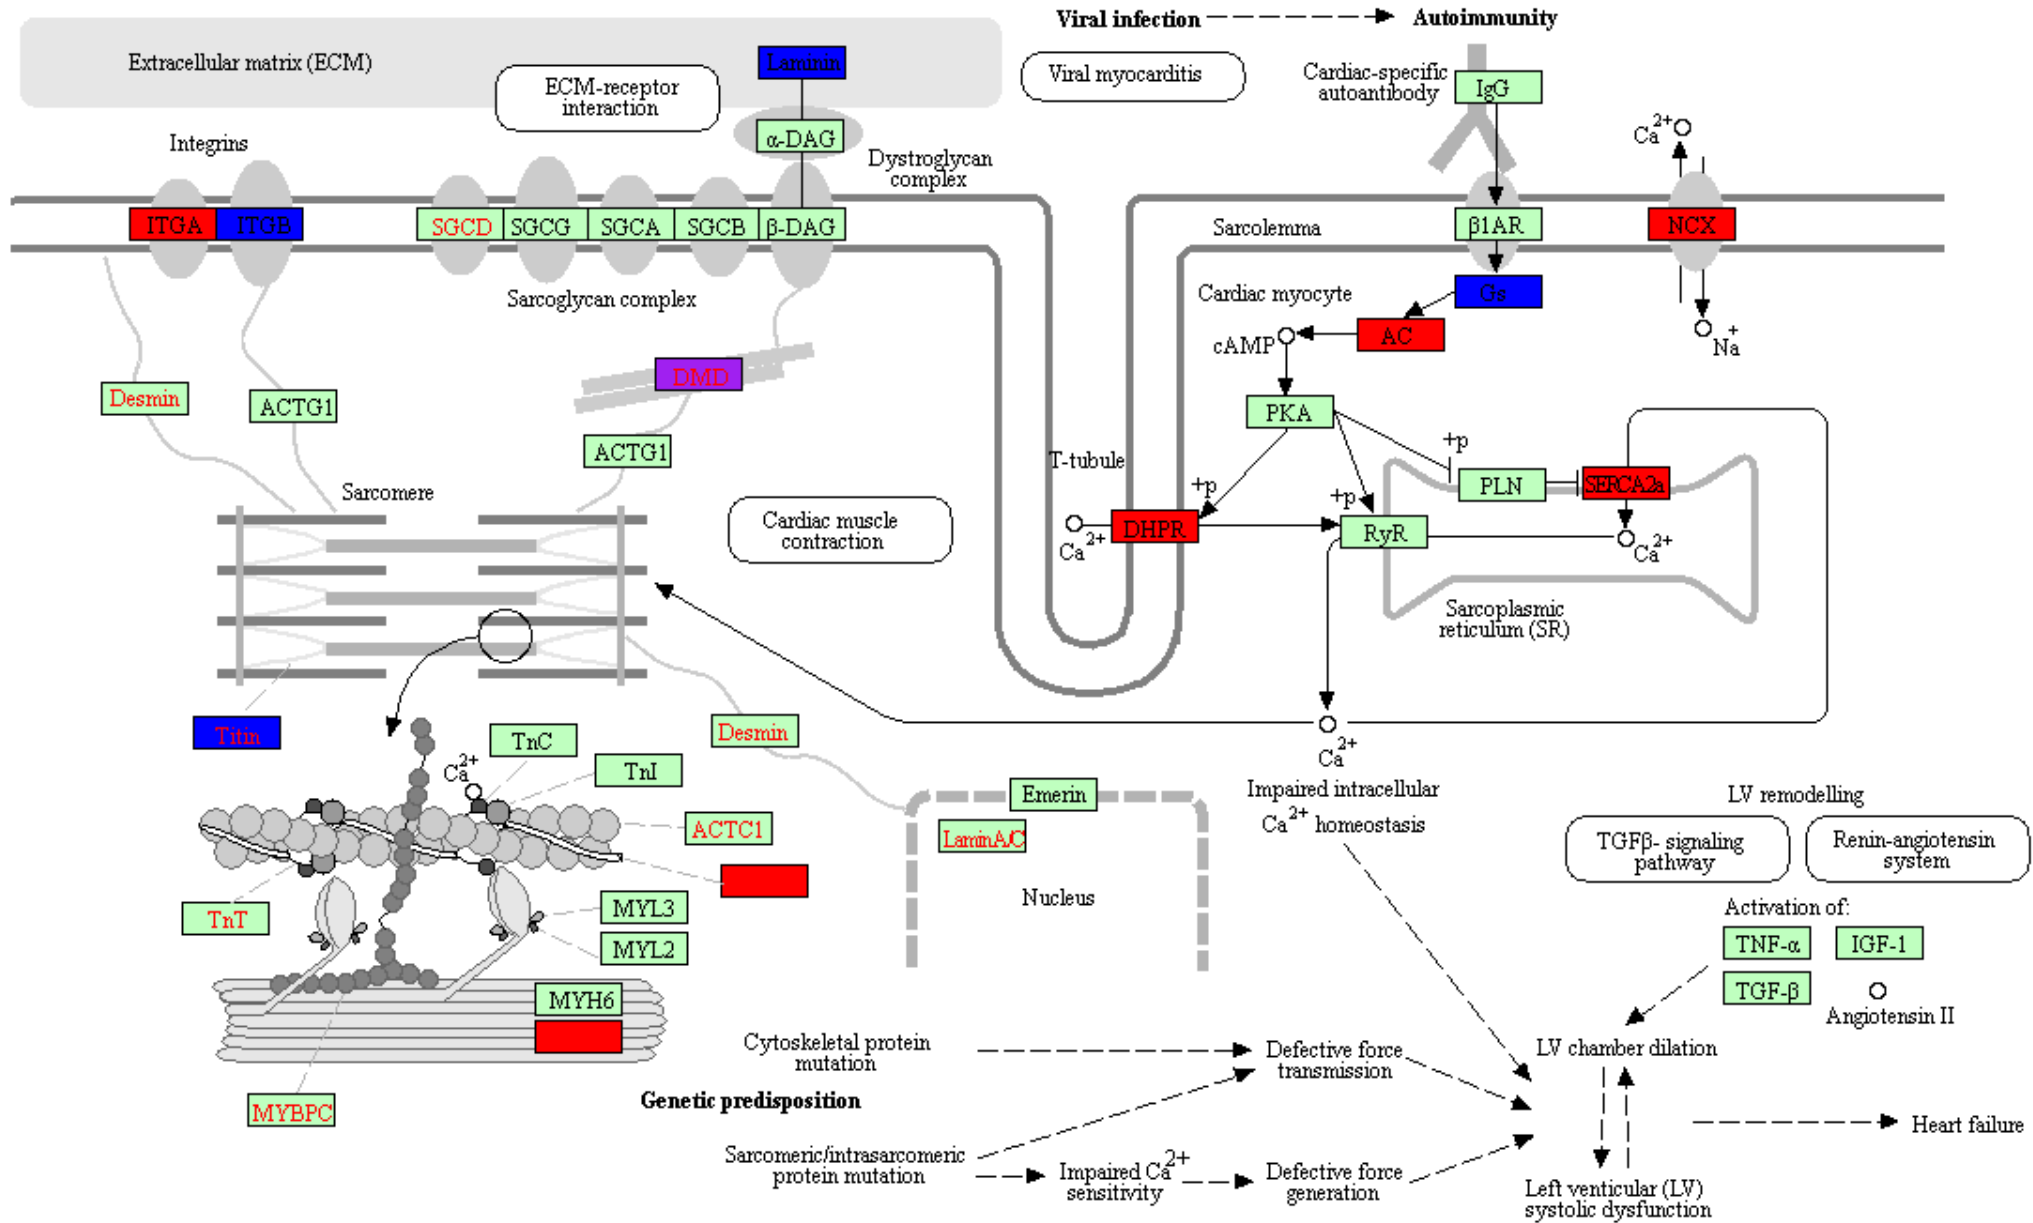

# HYPERTROPHIC CARDIOMYOPATHY (HCM)

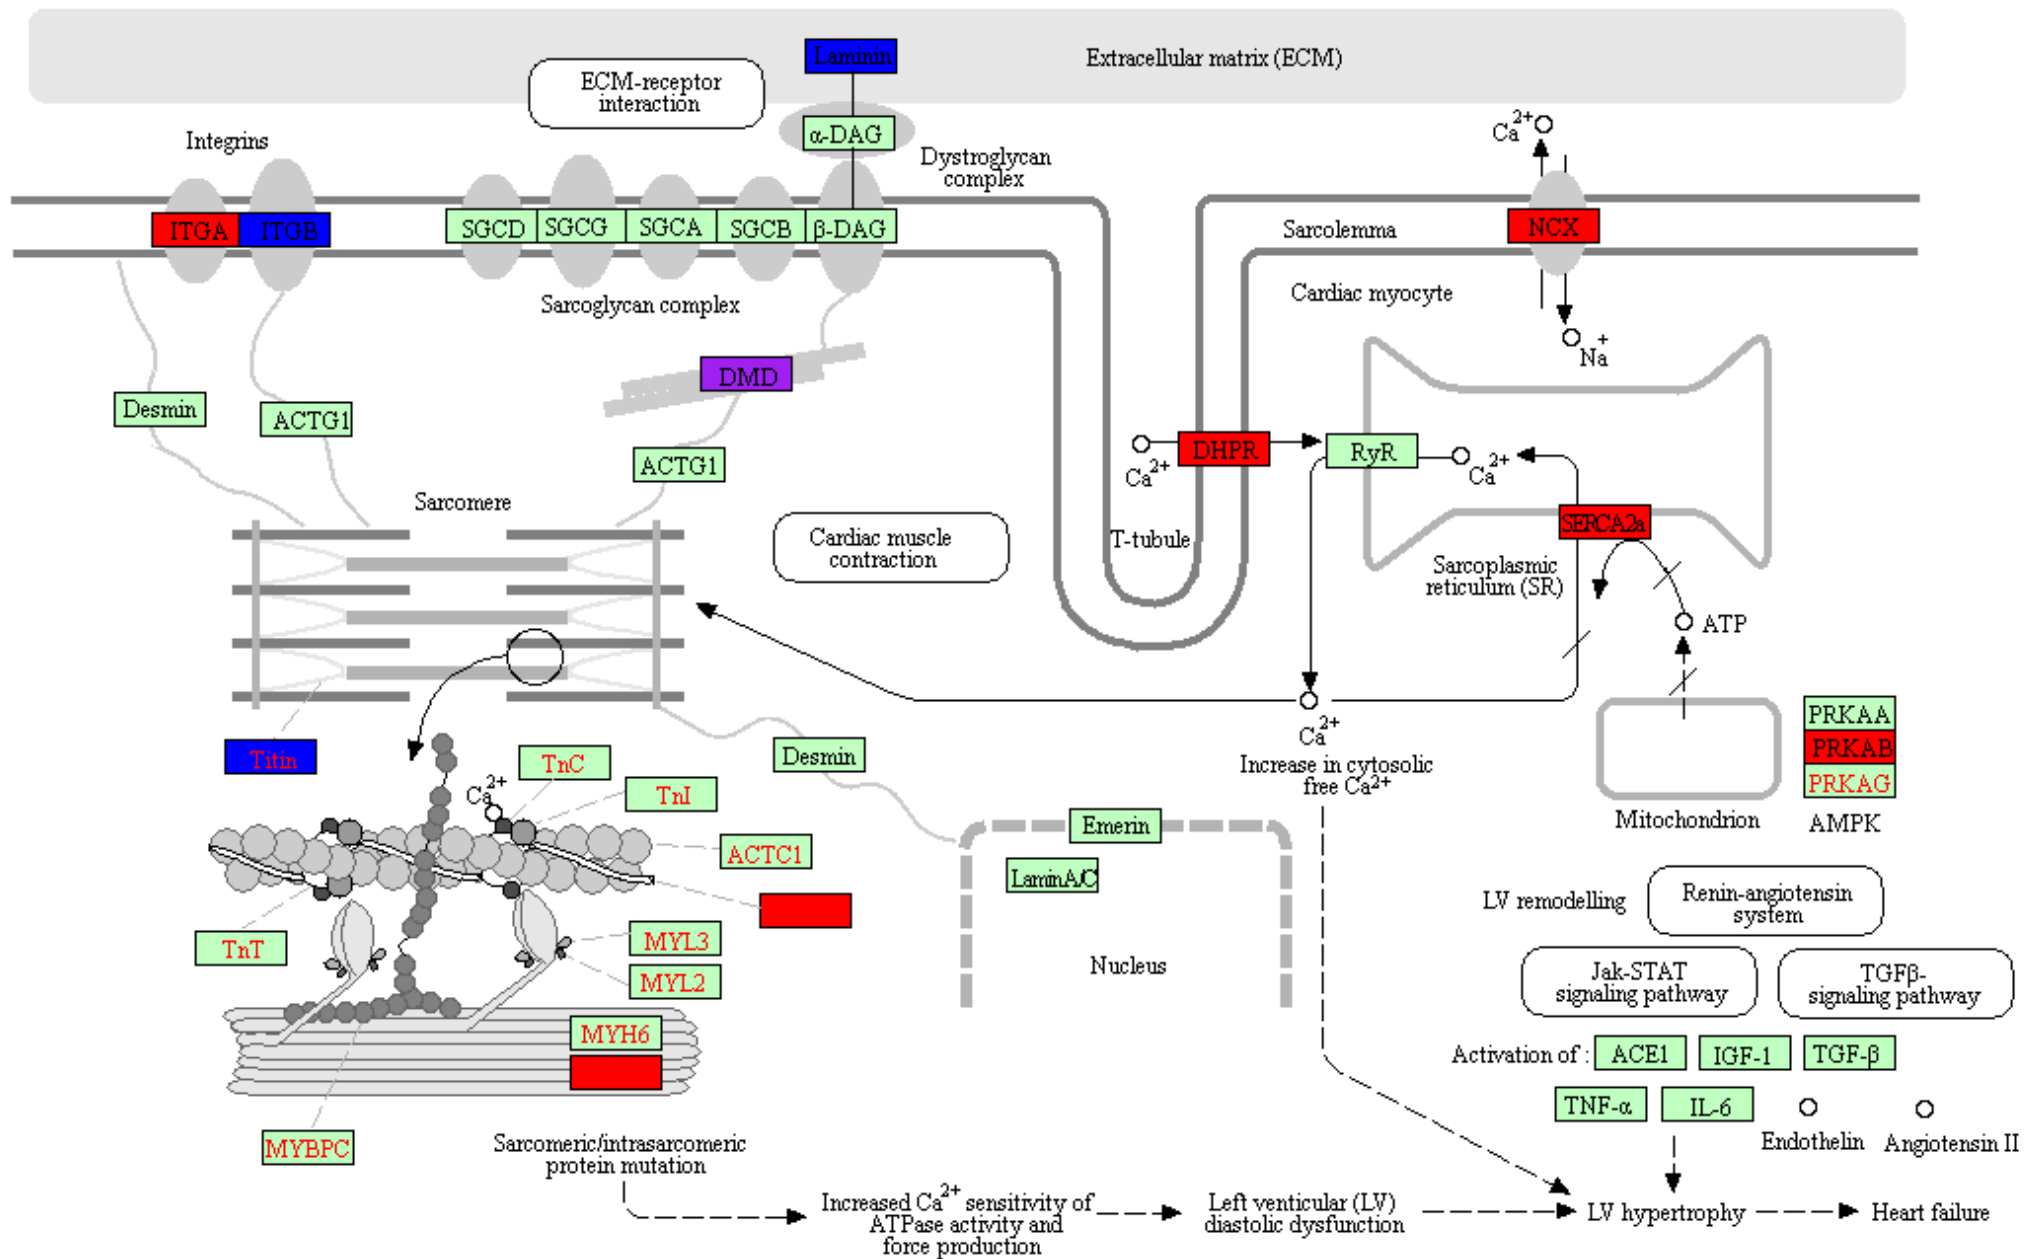

**CIRCADIAN ENTRAINMENT**

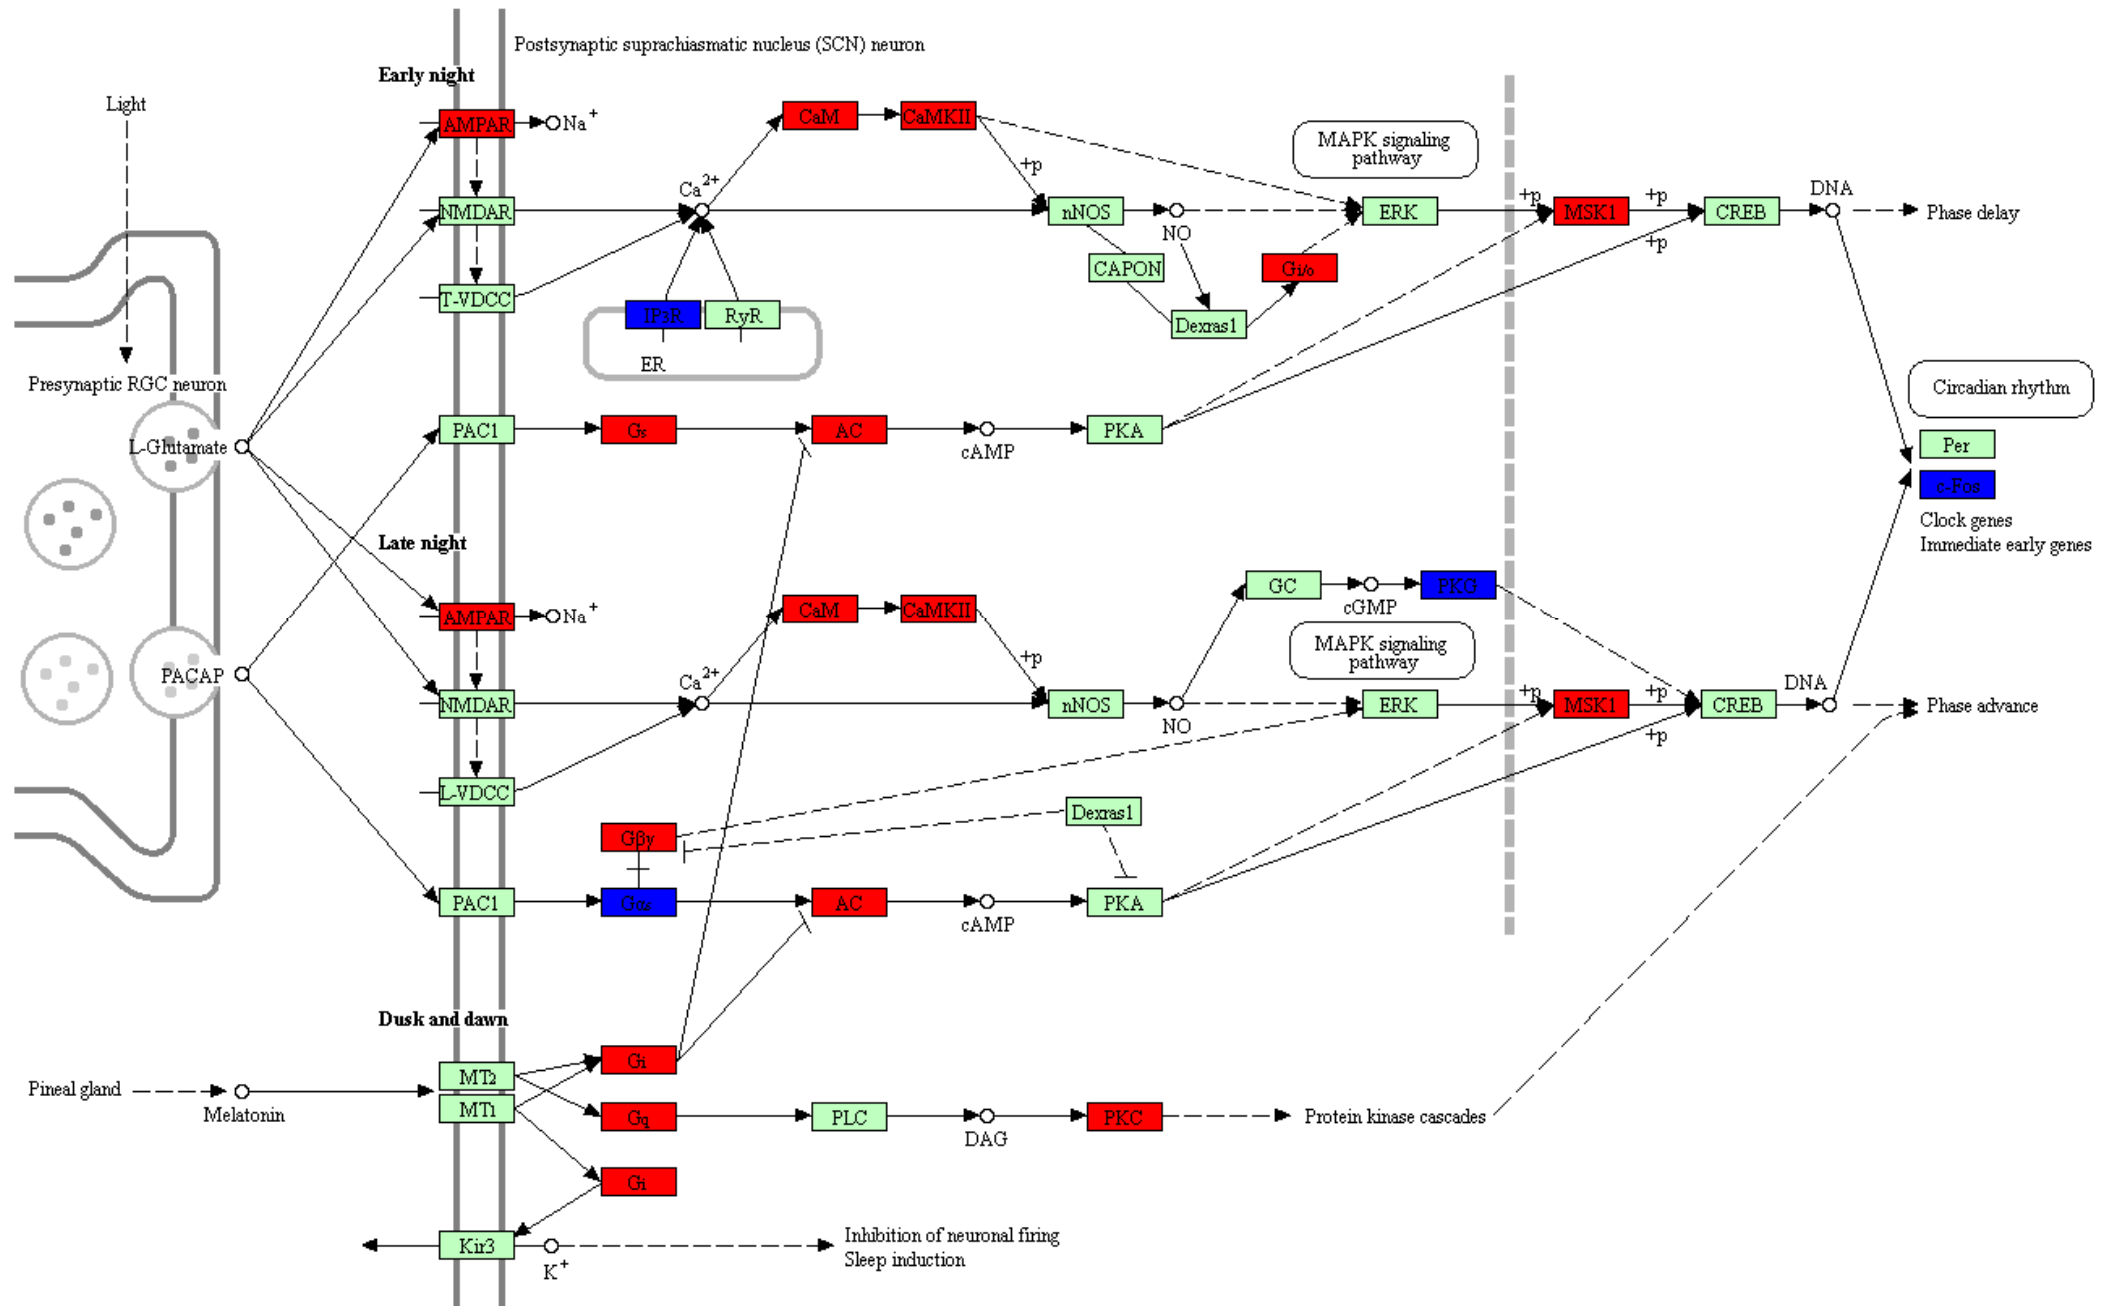

**GLUCAGON SIGNALING PATHWAY**

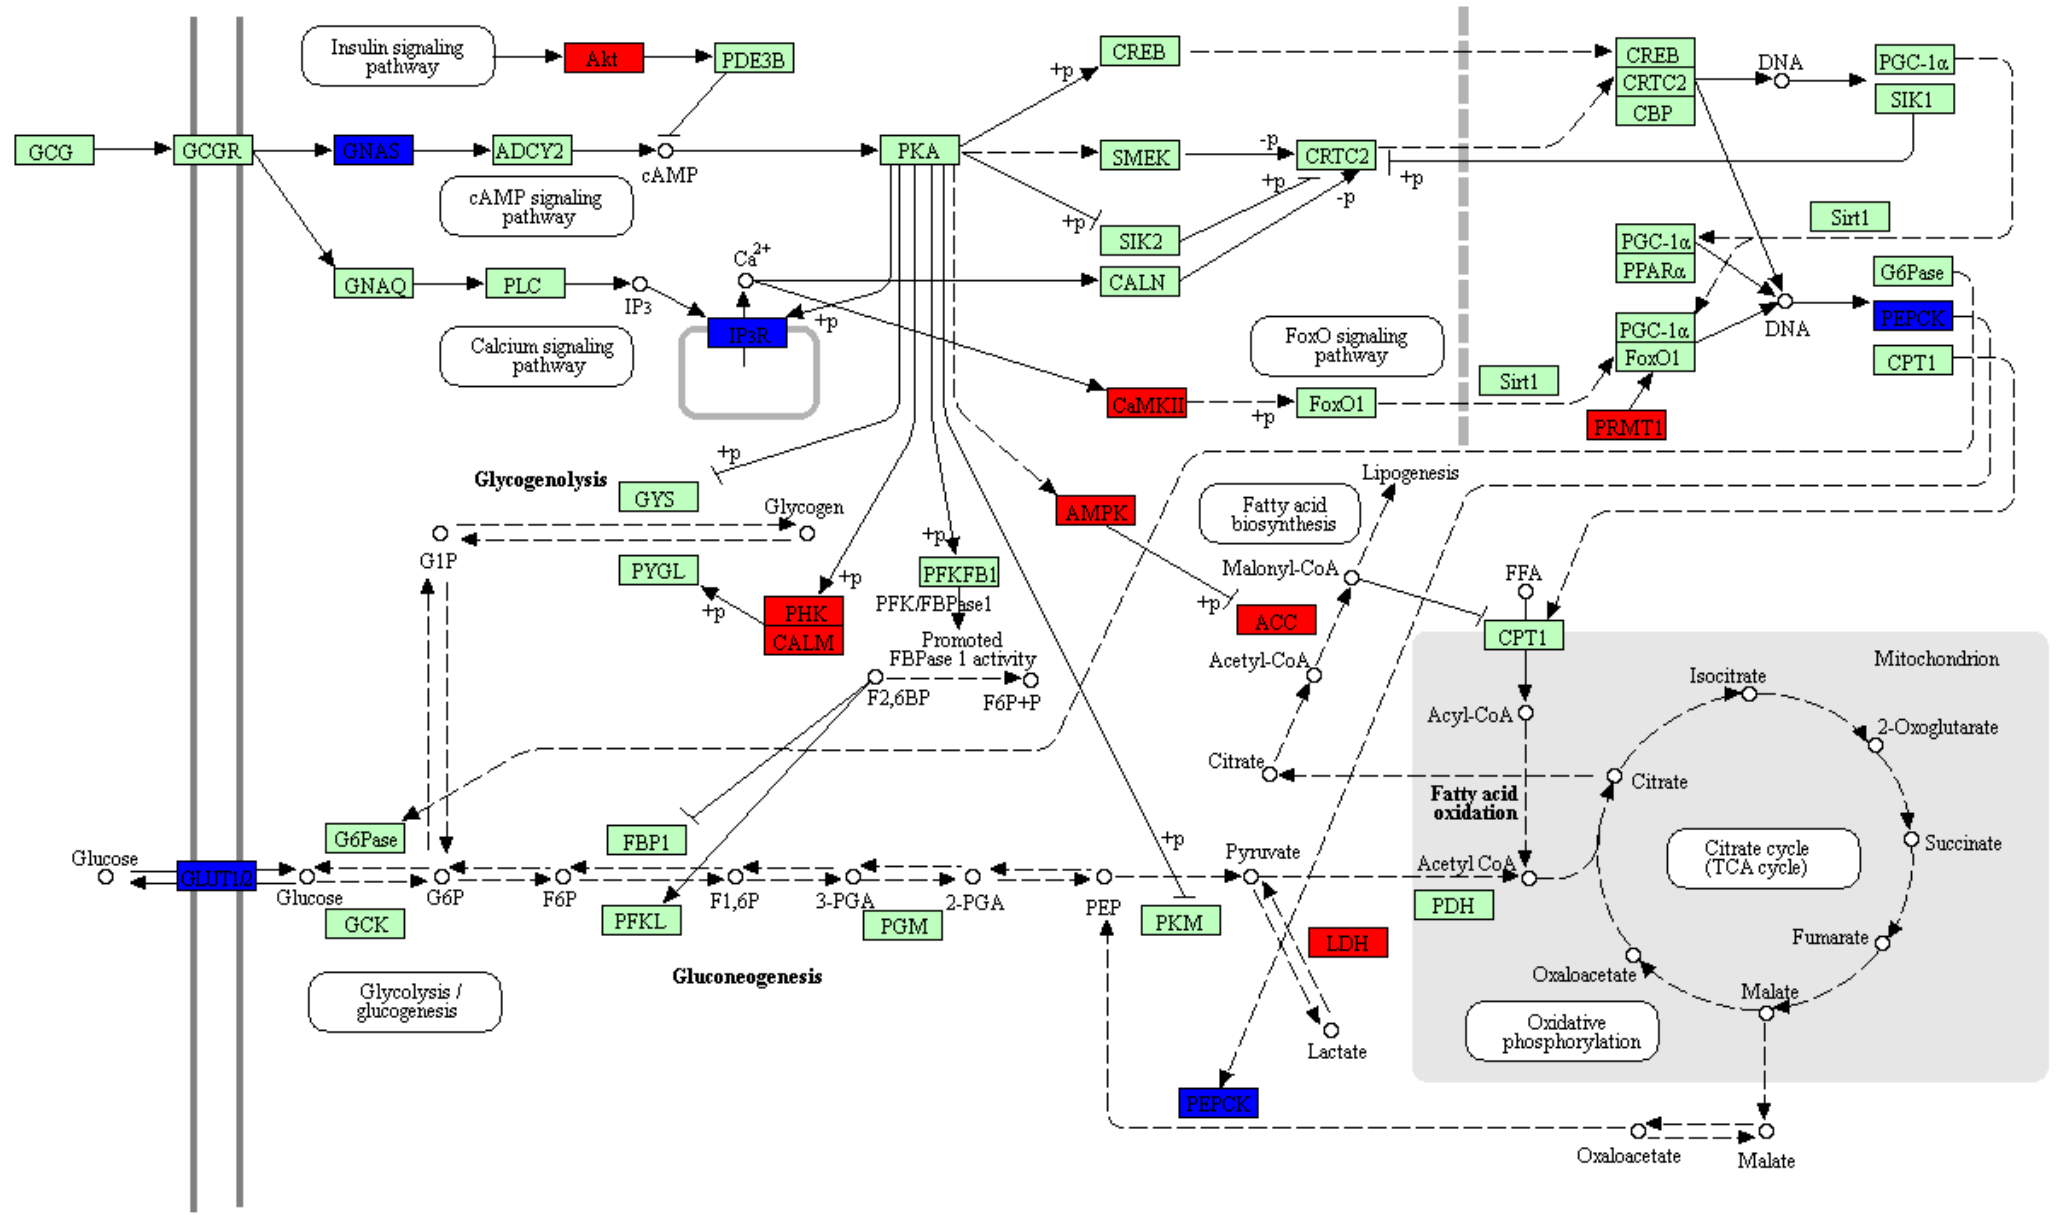





**SALIVARY SECRETION**

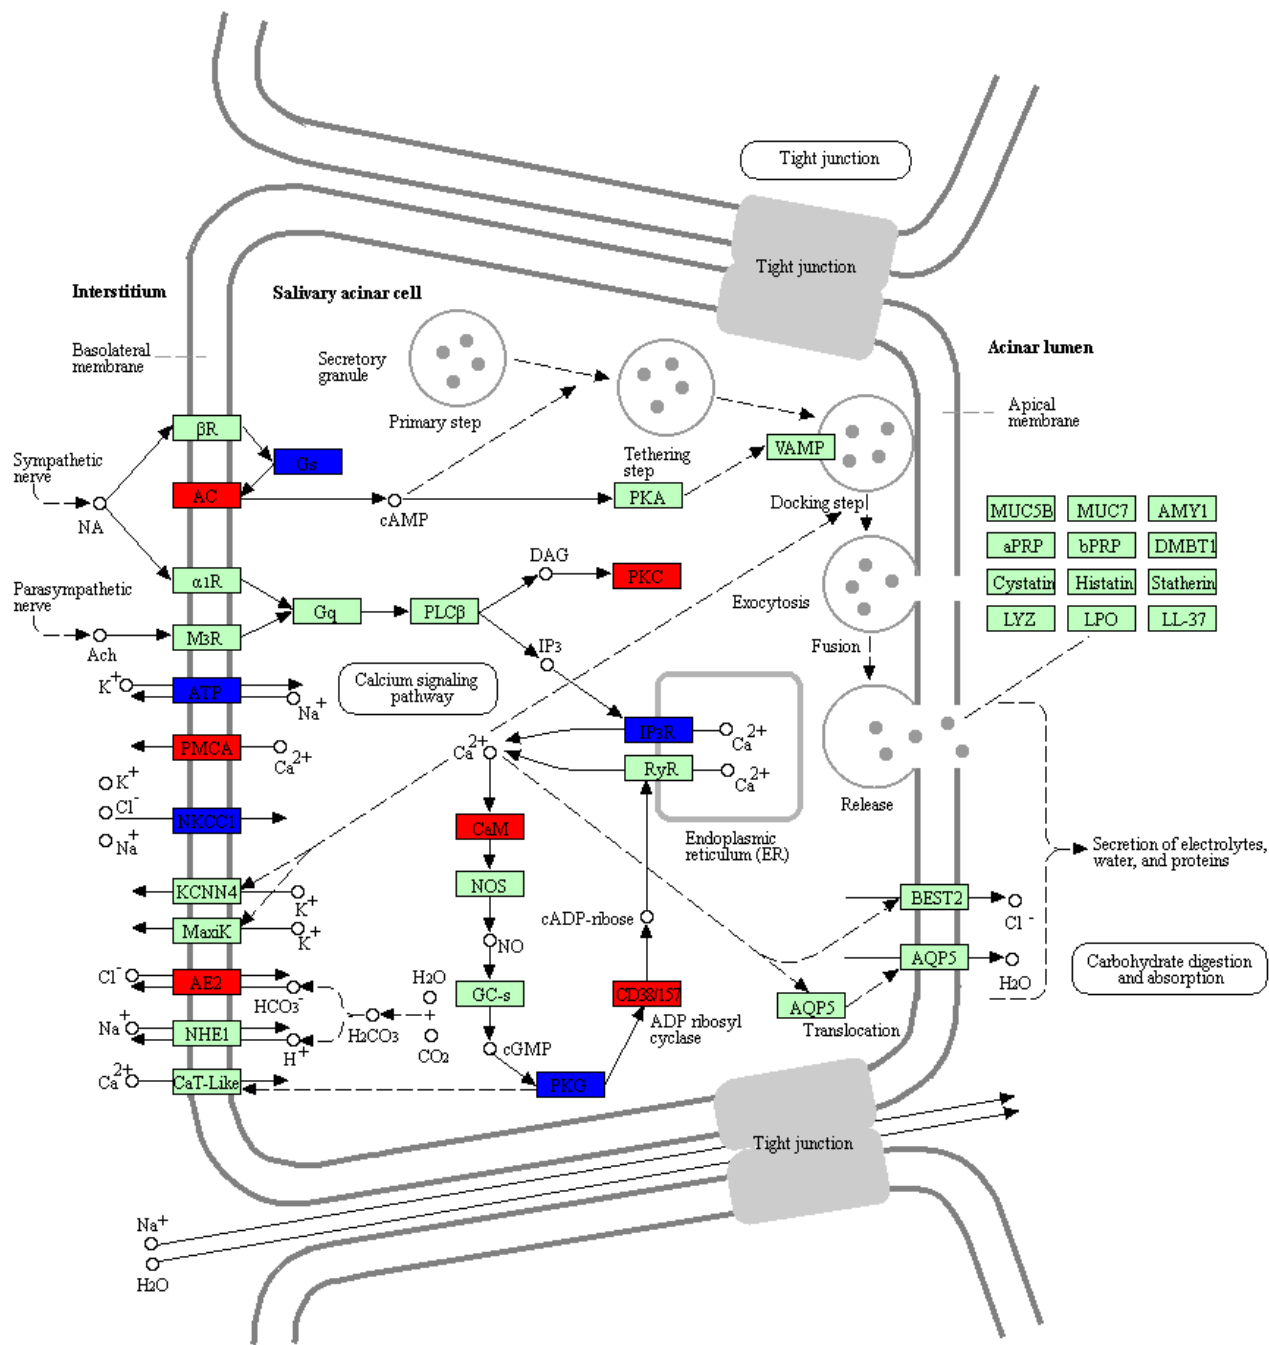

# ALDOSTERONE SYNTHESIS AND SECRETION

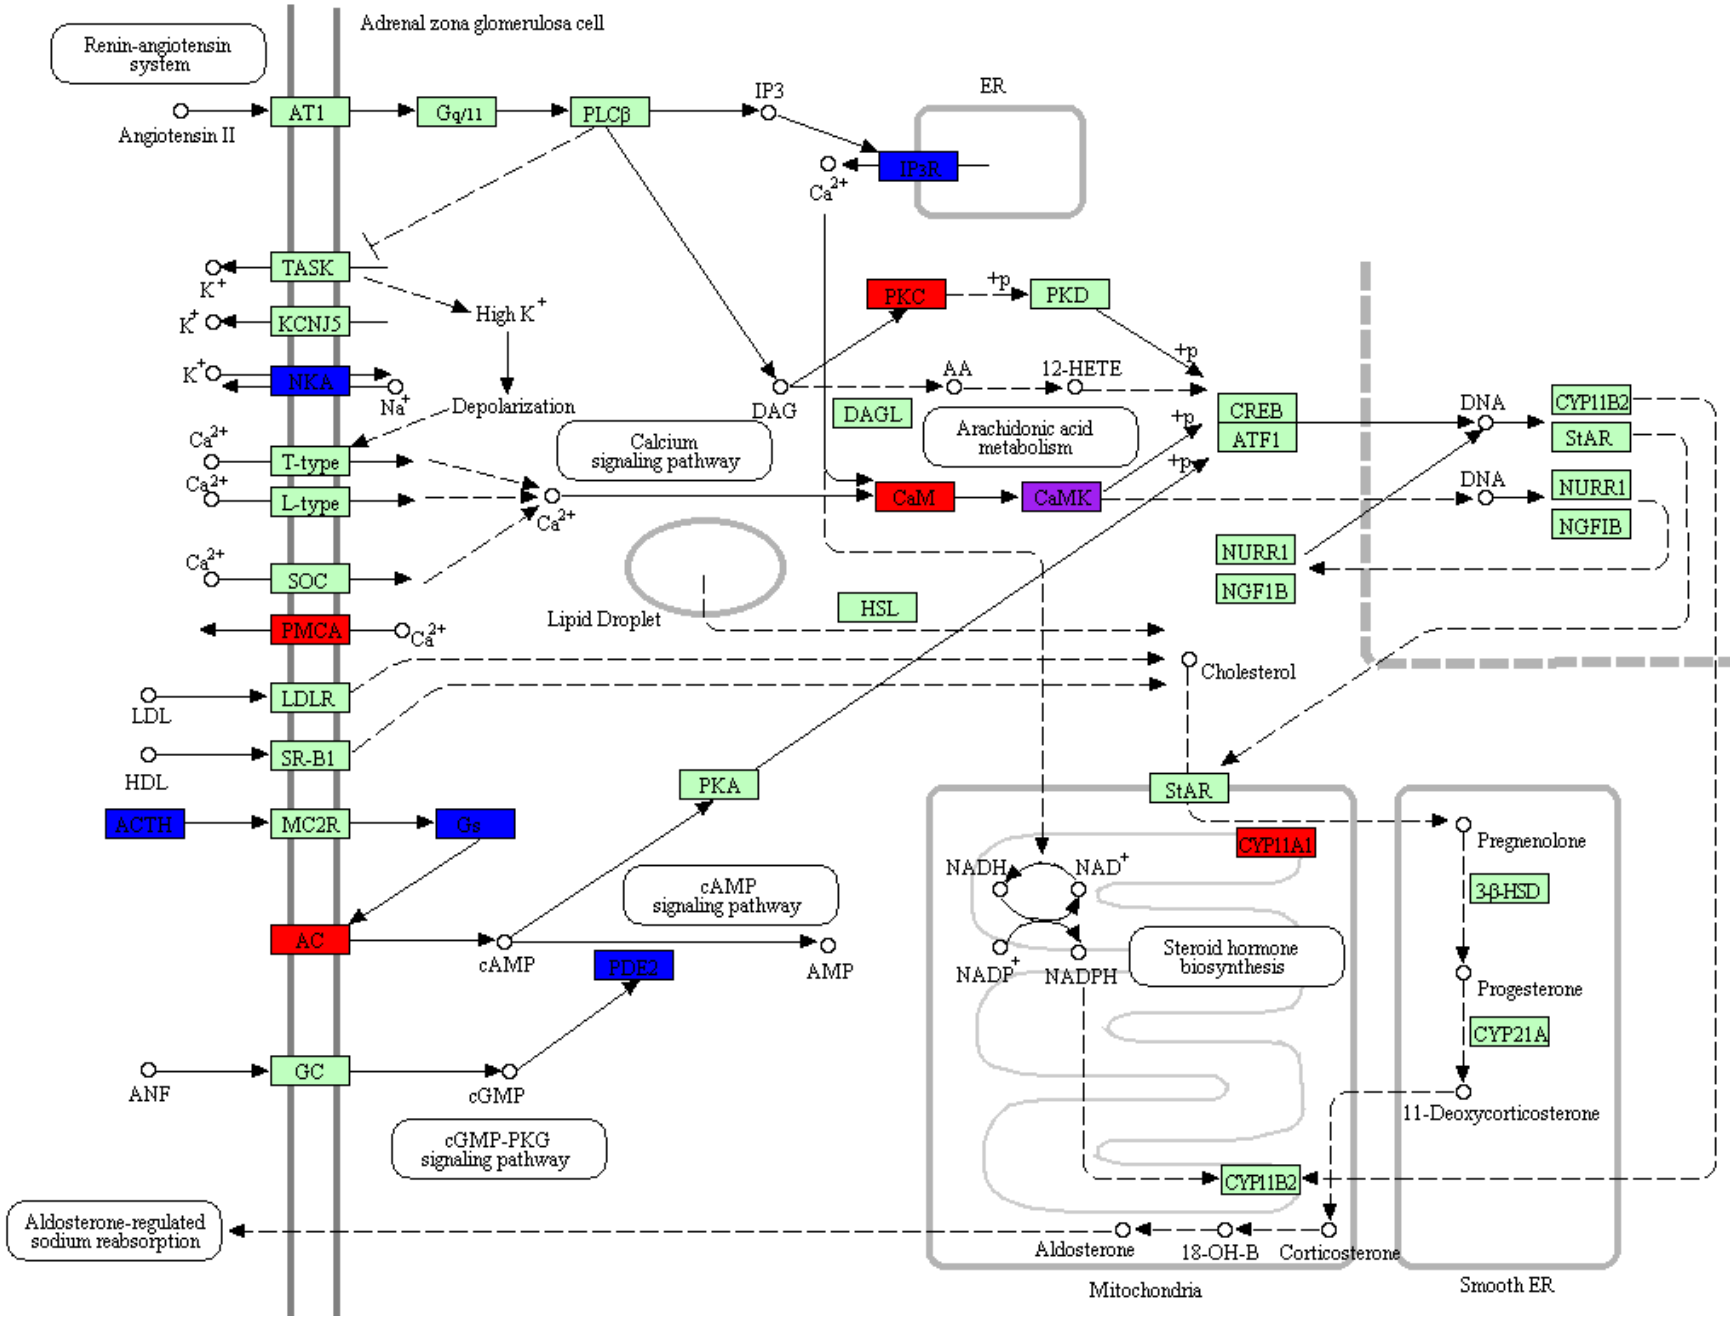

**PANCREATIC SECRETION**

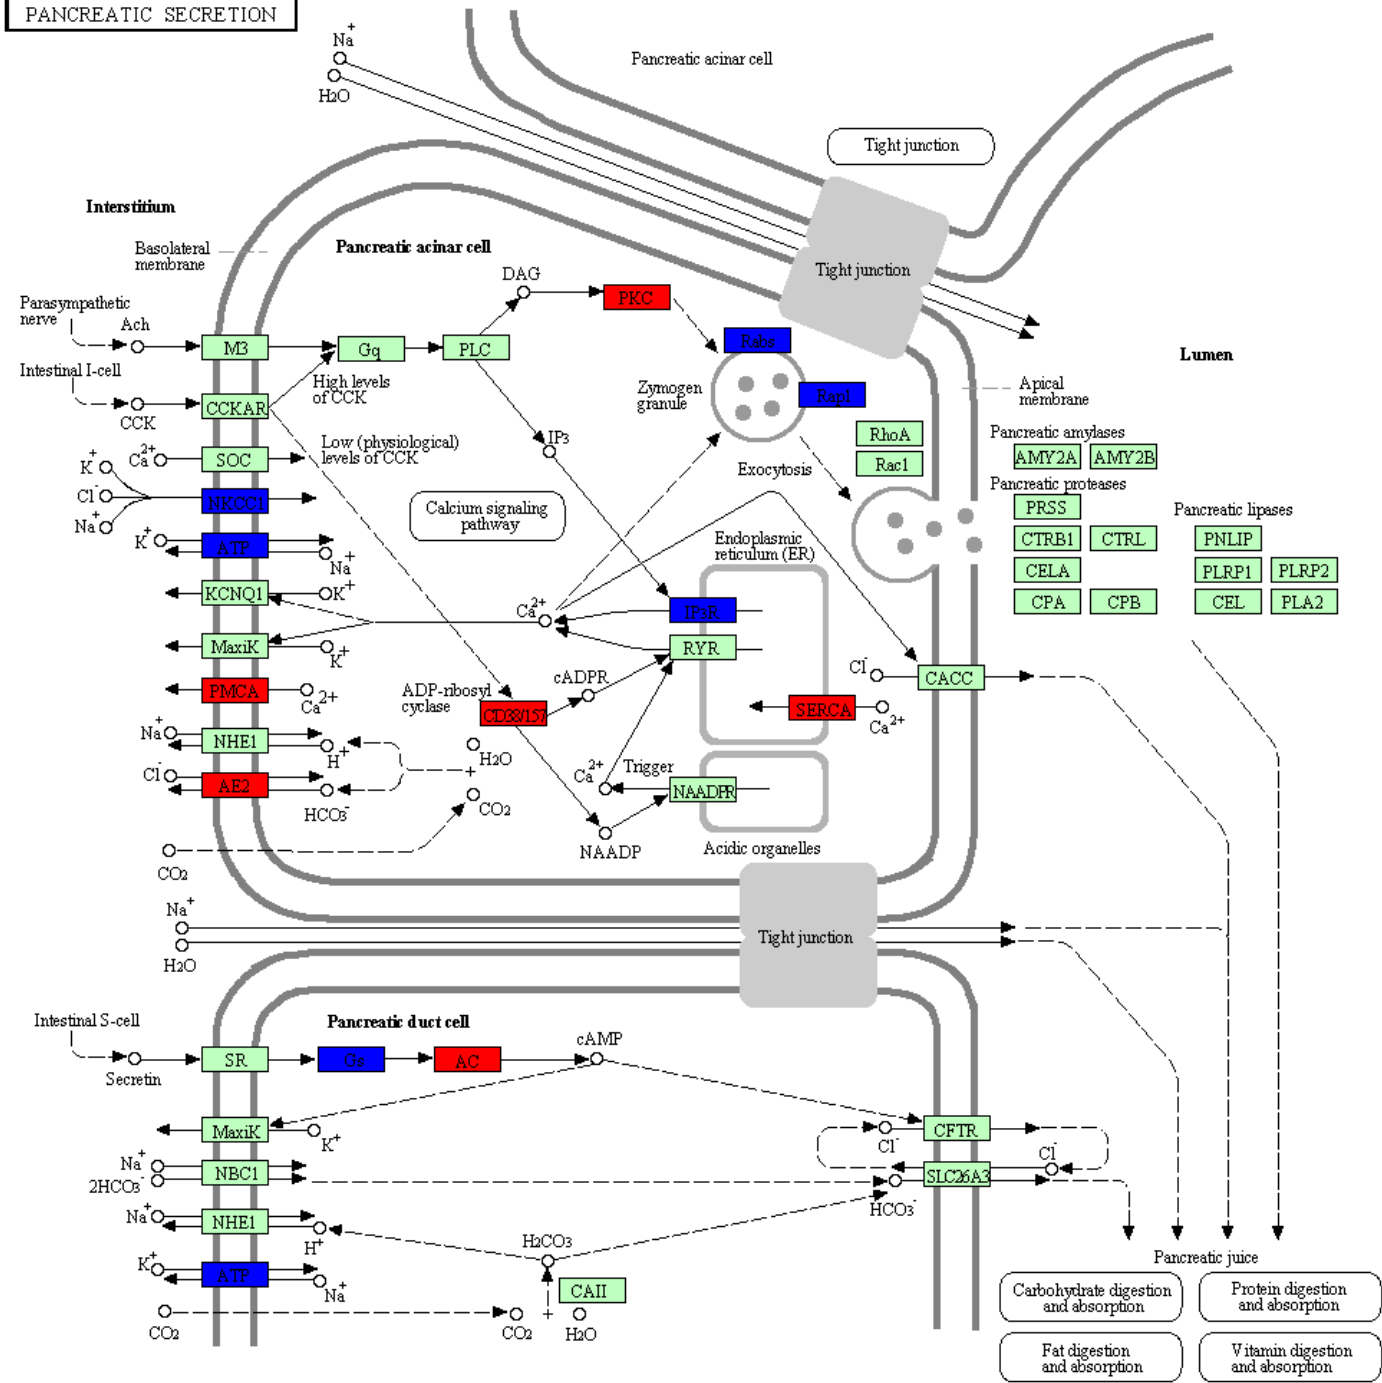

INFLAMMATORY MEDIATOR REGULATION OF TRP CHANNELS

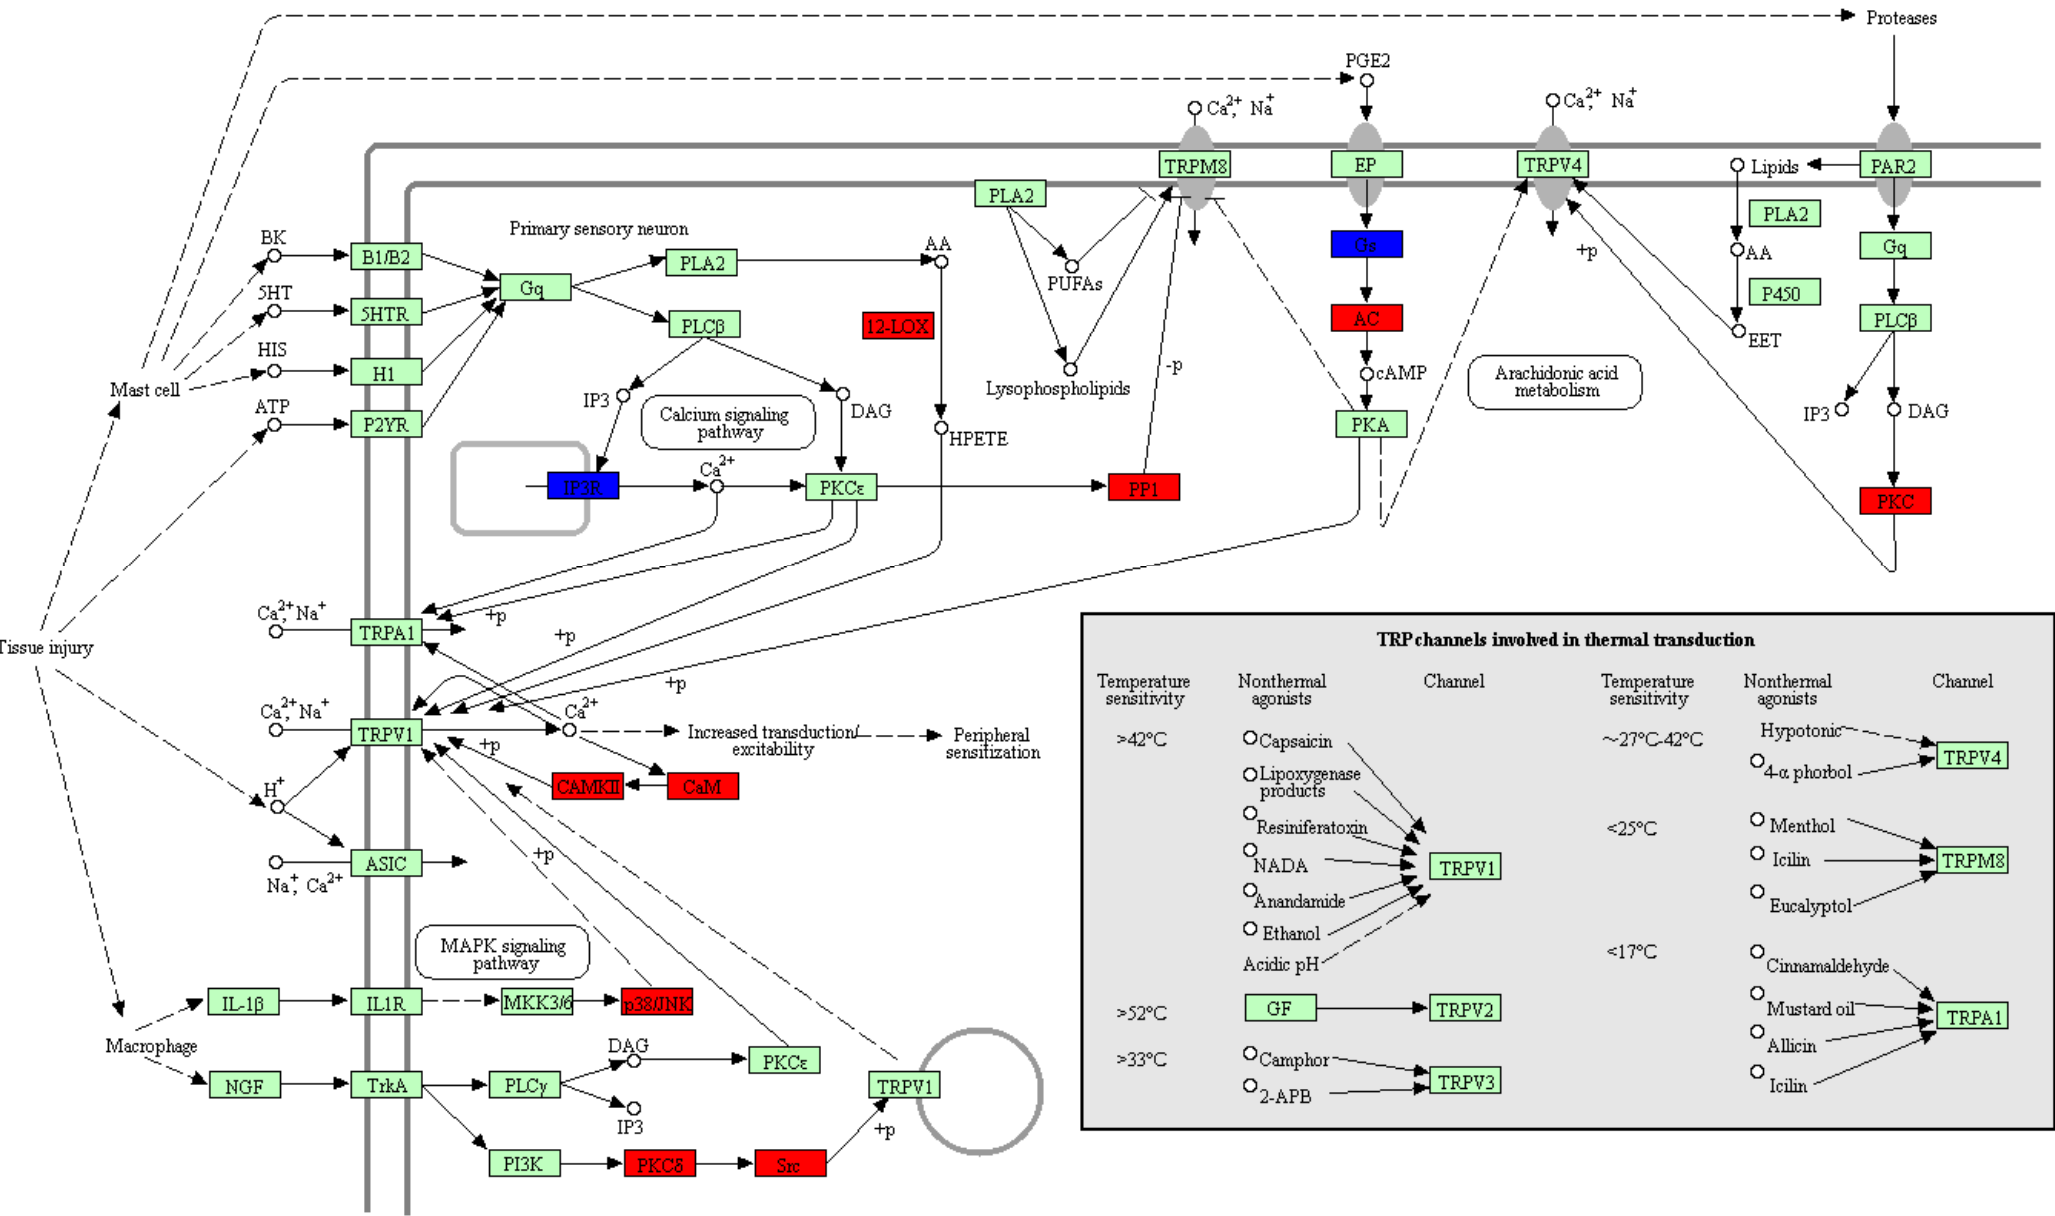

**TRP channels involved in thermal transduction**

| Temperature sensitivity | Nonthermal agonists     | Channel | Temperature sensitivity | Nonthermal agonists | Channel      |       |
|-------------------------|-------------------------|---------|-------------------------|---------------------|--------------|-------|
| >42°C                   | ○ Capsaicin             | TRPV1   | ~27°C-42°C              | ○ Hypotonic         | TRPV4        |       |
|                         | ○ Lipoxygenase products |         |                         | ○ 4-α phorbol       |              |       |
|                         | ○ Resiniferatoxin       |         |                         |                     |              |       |
|                         | ○ NADA                  |         |                         | <25°C               | ○ Menthol    | TRPM8 |
|                         | ○ Anandamide            |         |                         |                     | ○ Icilin     |       |
|                         | ○ Ethanol               |         |                         |                     | ○ Eucalyptol |       |
|                         | ○ Acidic pH             |         | <17°C                   | ○ Cinnamaldehyde    | TRPA1        |       |
| >52°C                   | ○ GF                    | TRPV2   |                         | ○ Mustard oil       |              |       |
| >33°C                   | ○ Camphor               | TRPV3   |                         | ○ Allicin           |              |       |
|                         | ○ 2-APB                 |         |                         | ○ Icilin            |              |       |



CHolinergic SYNAPSE

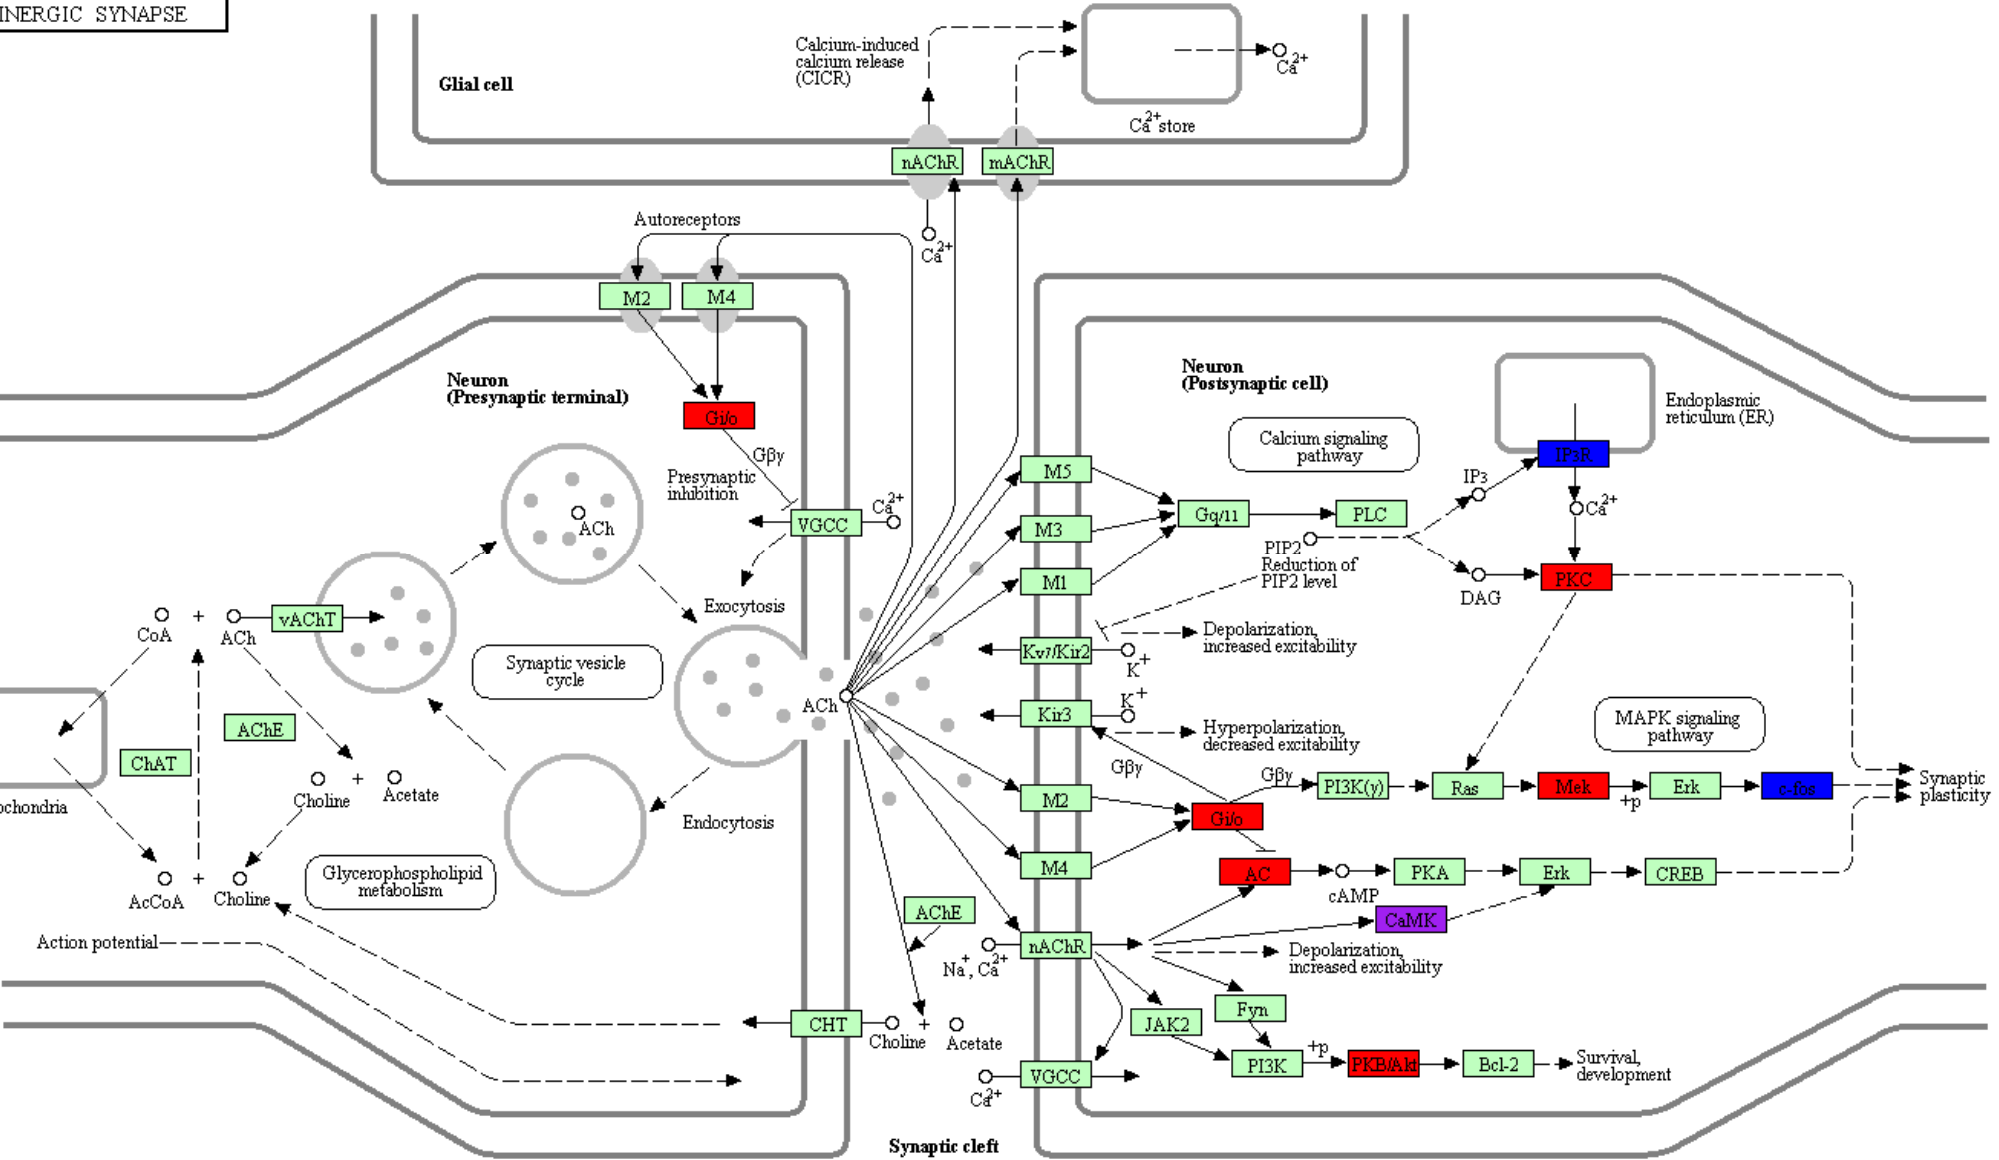

# GAP JUNCTION

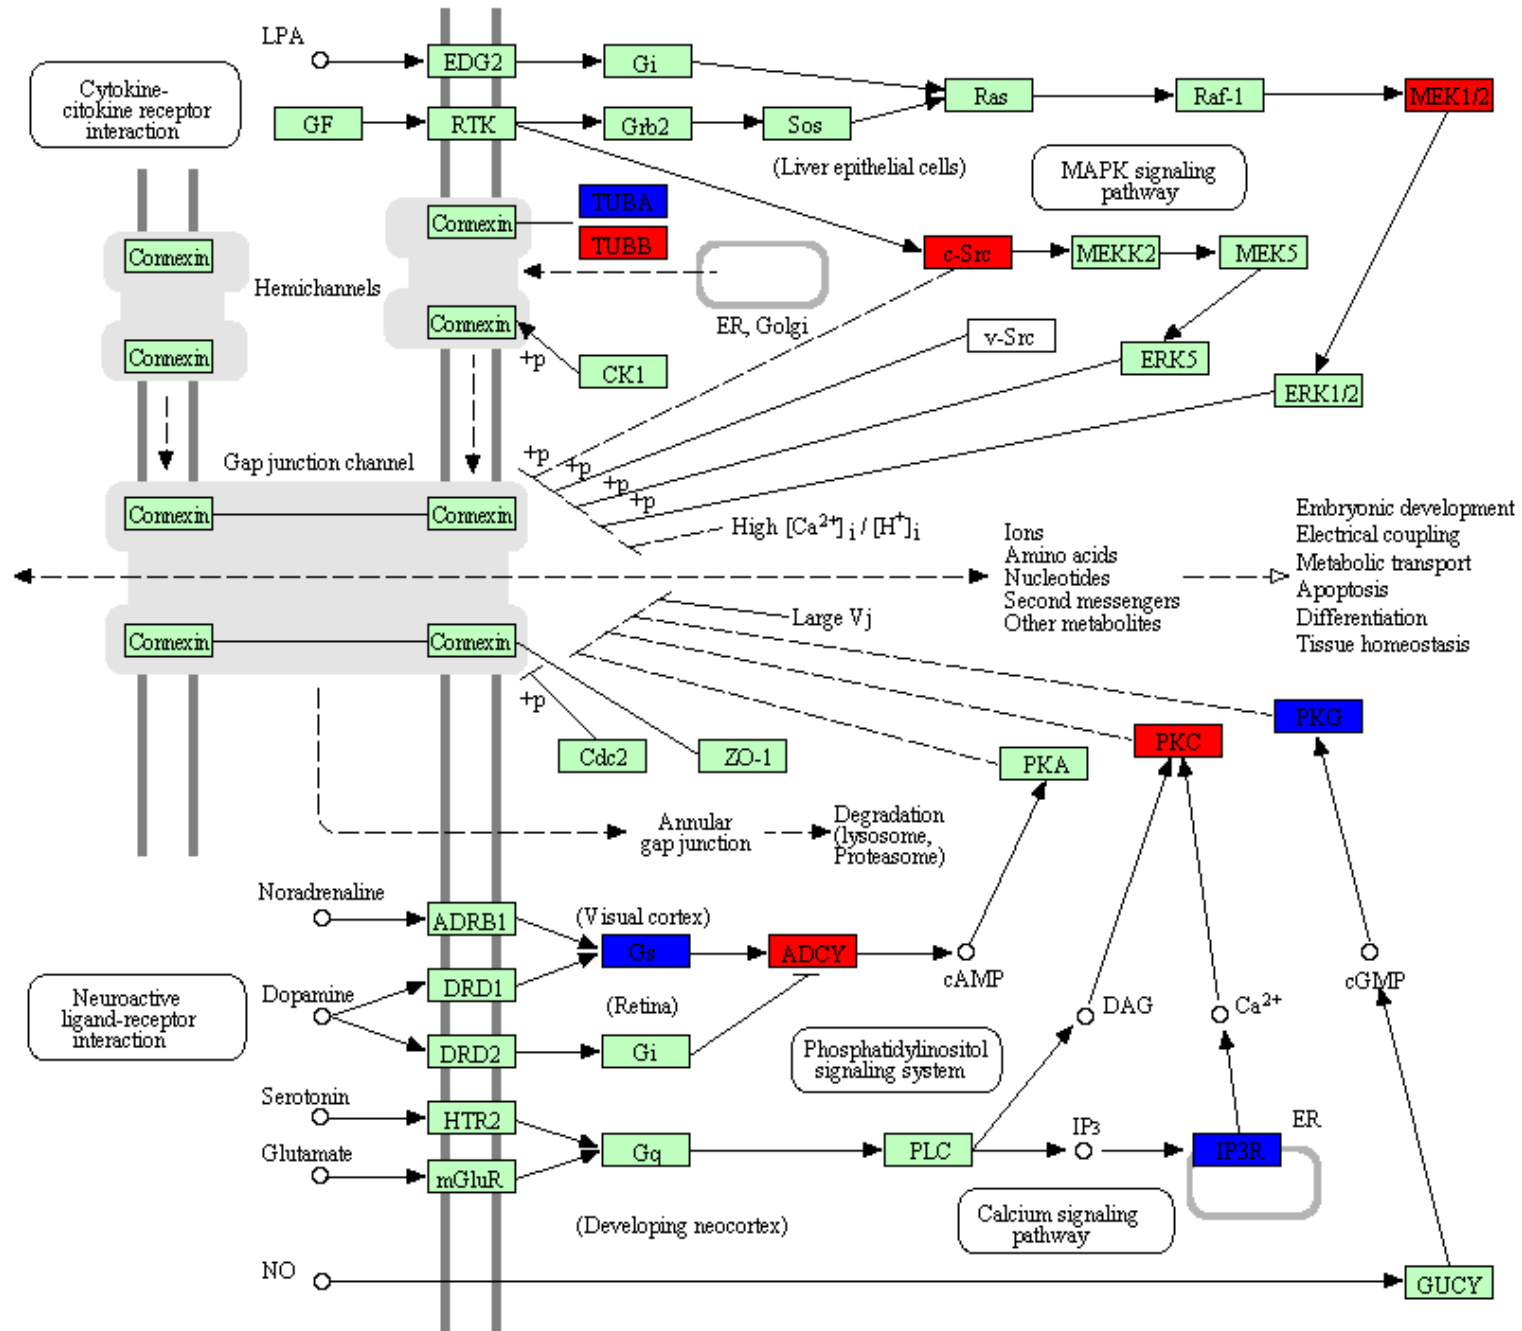



# GnRH SIGNALING PATHWAY

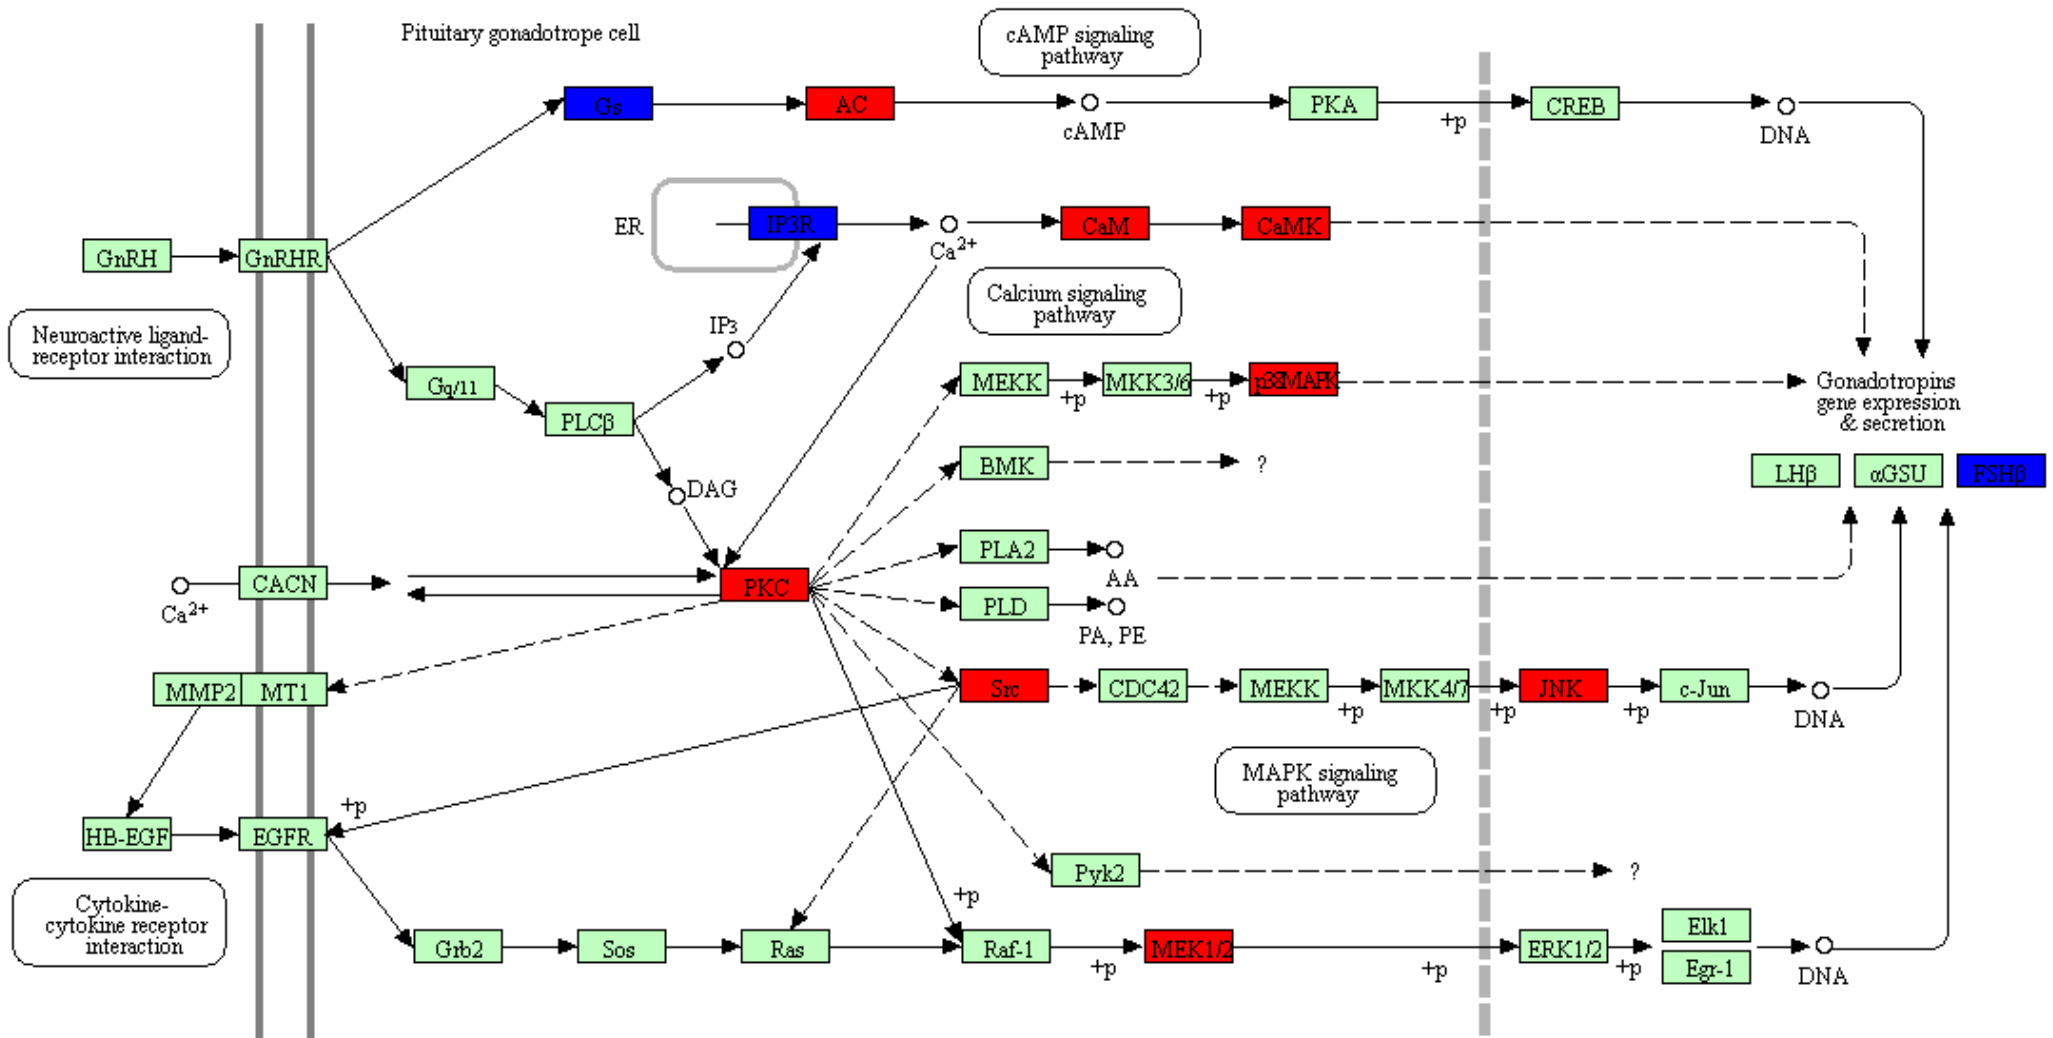

# HIF-1 SIGNALING PATHWAY

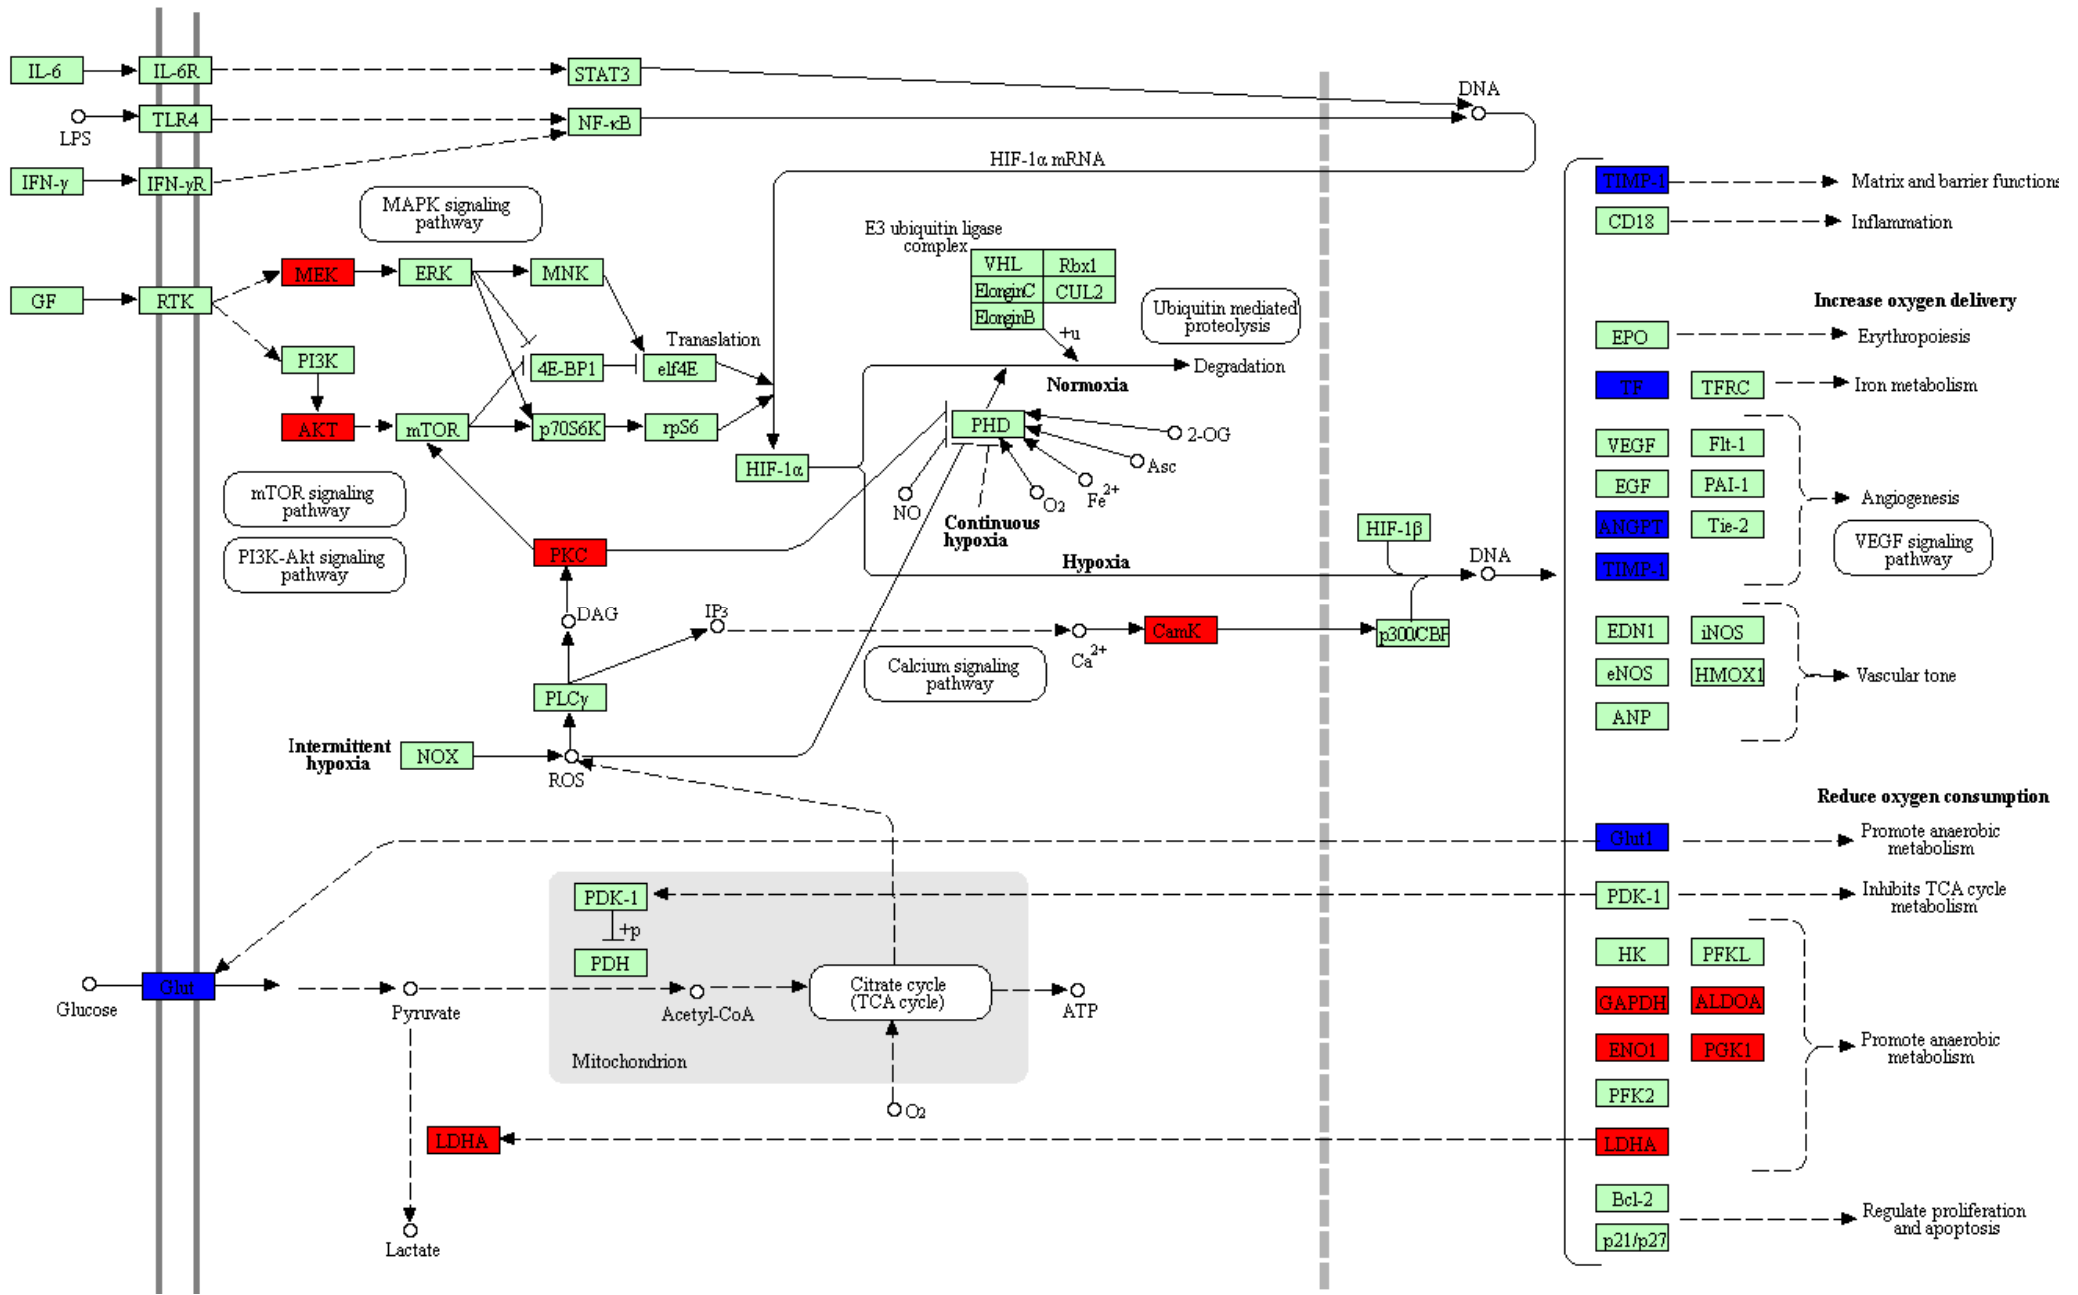



# ARRHYTHMOGENIC RIGHT VENTRICULAR CARDIOMYOPATHY (ARVC)

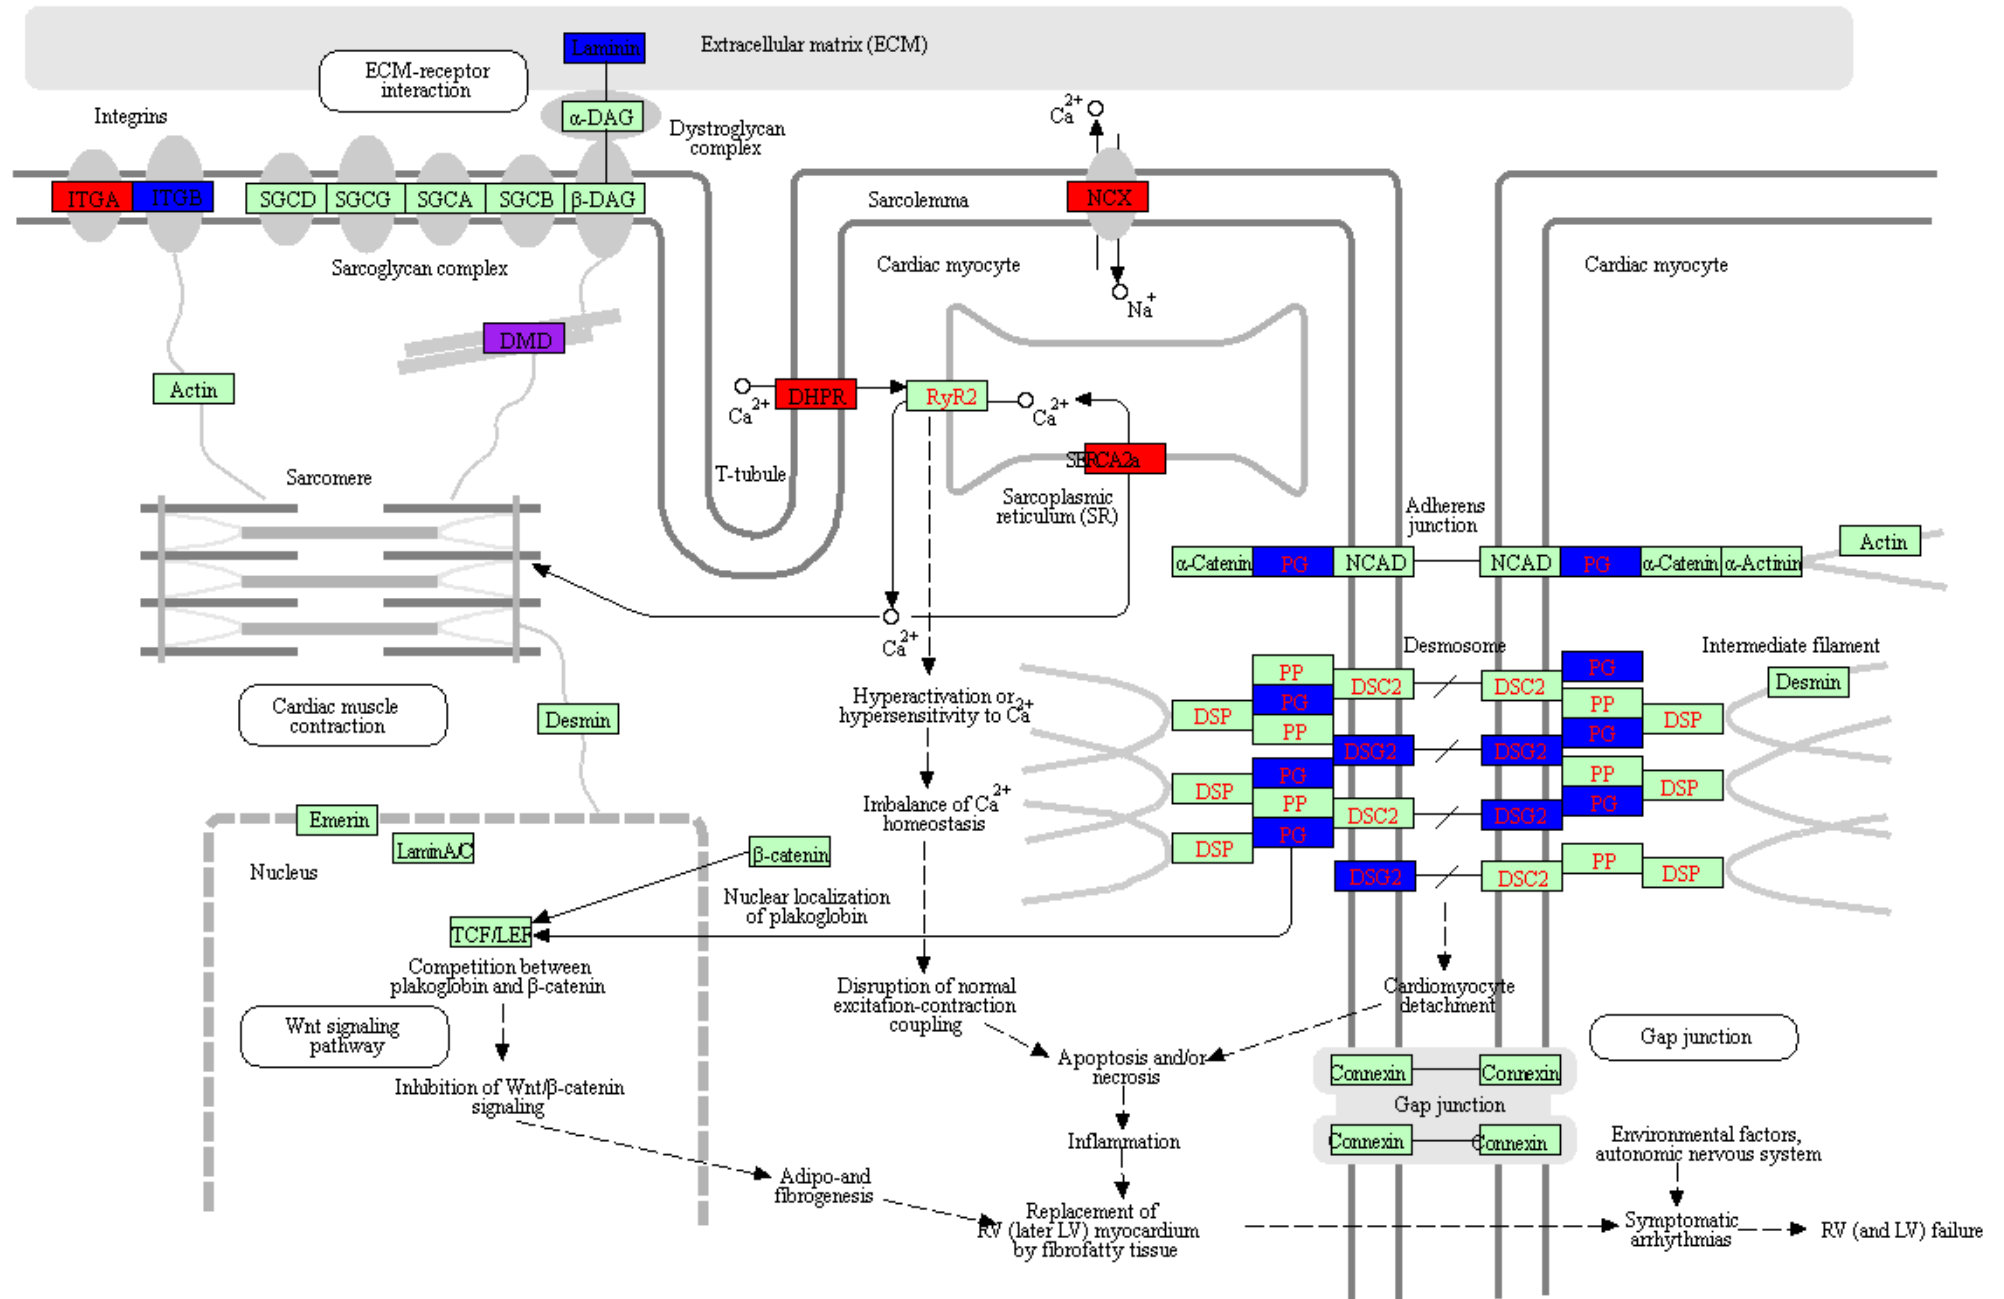

# SMALL CELL LUNG CANCER

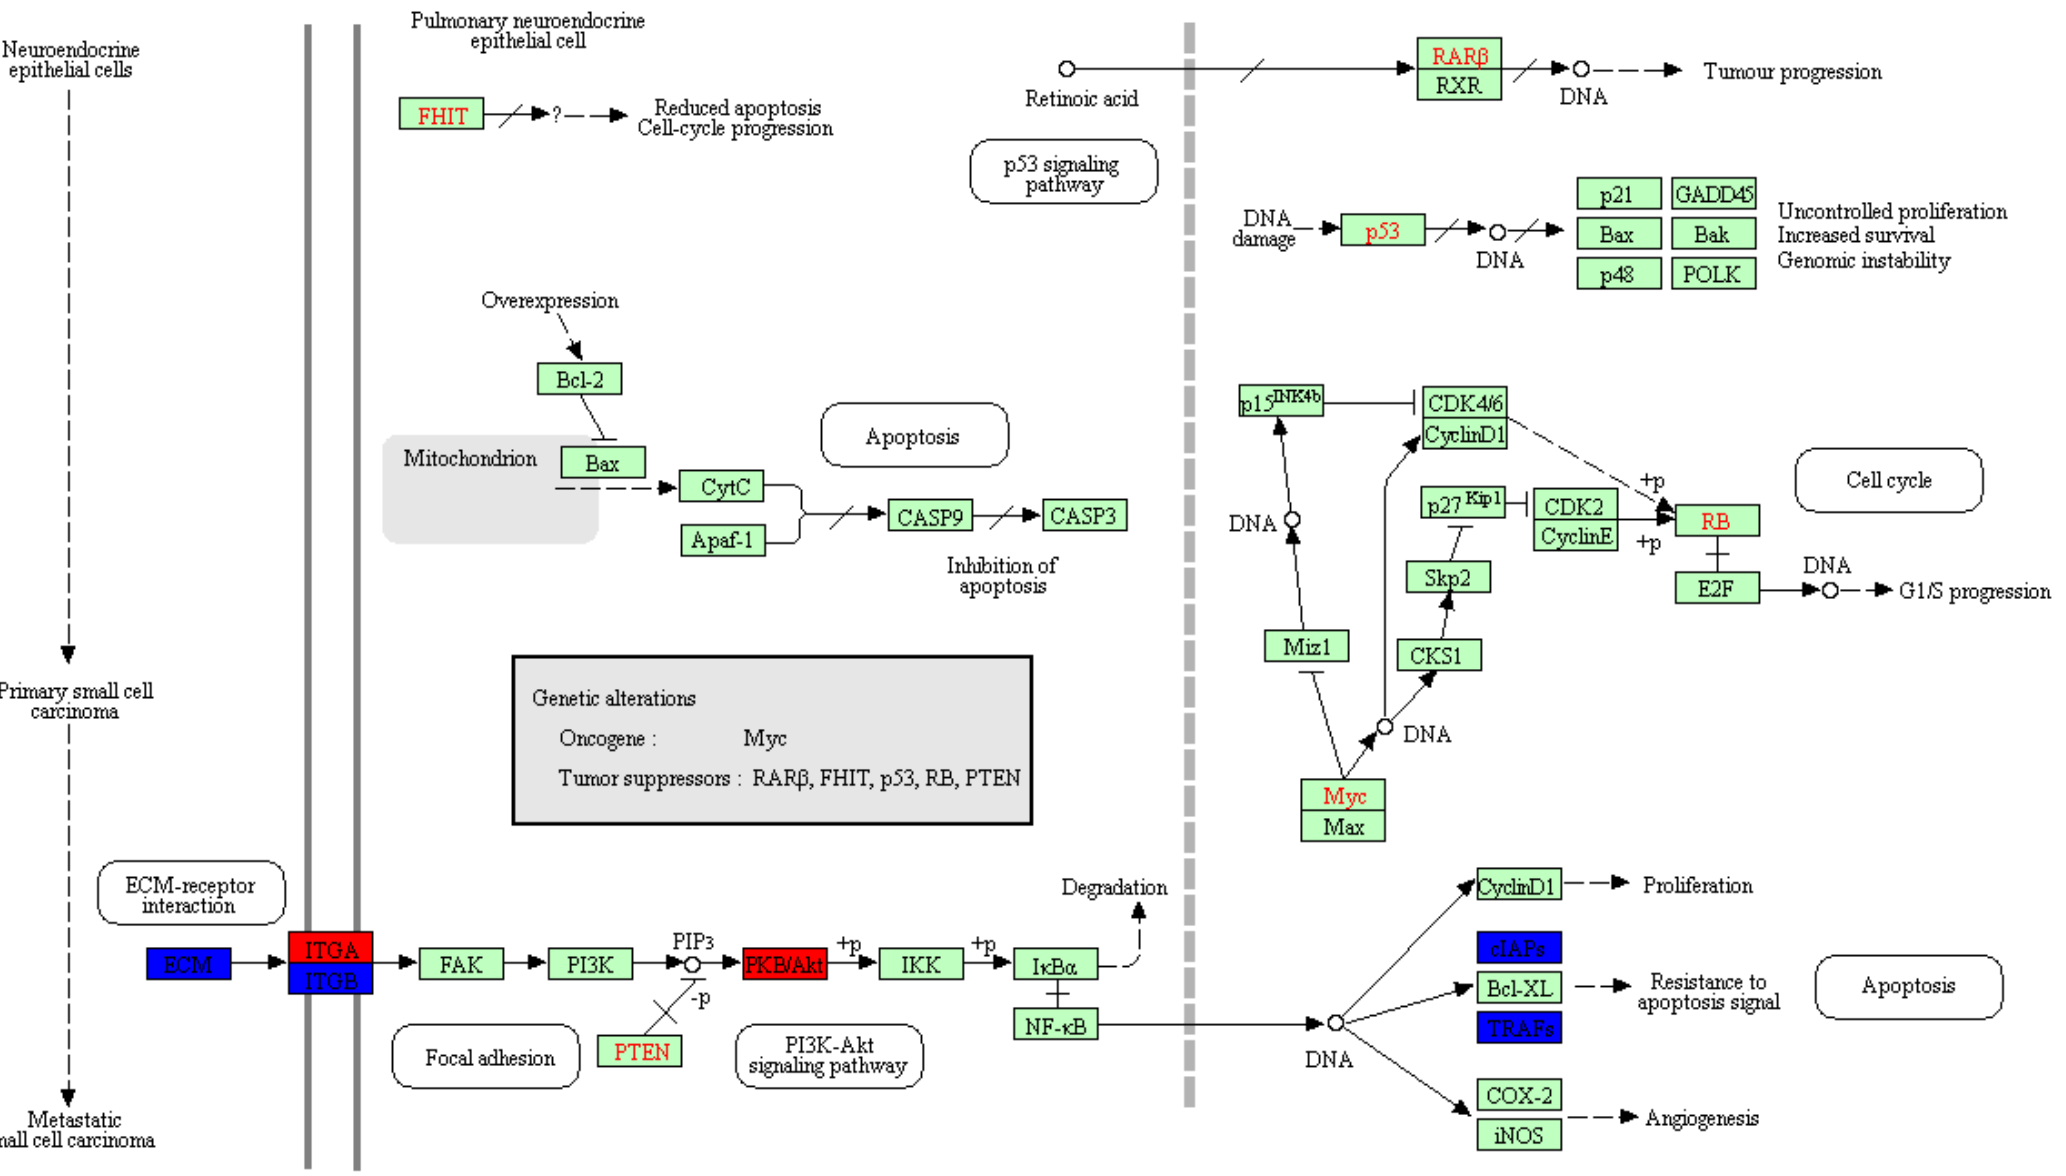

ADIPOCYTOKINE SIGNALING PATHWAY

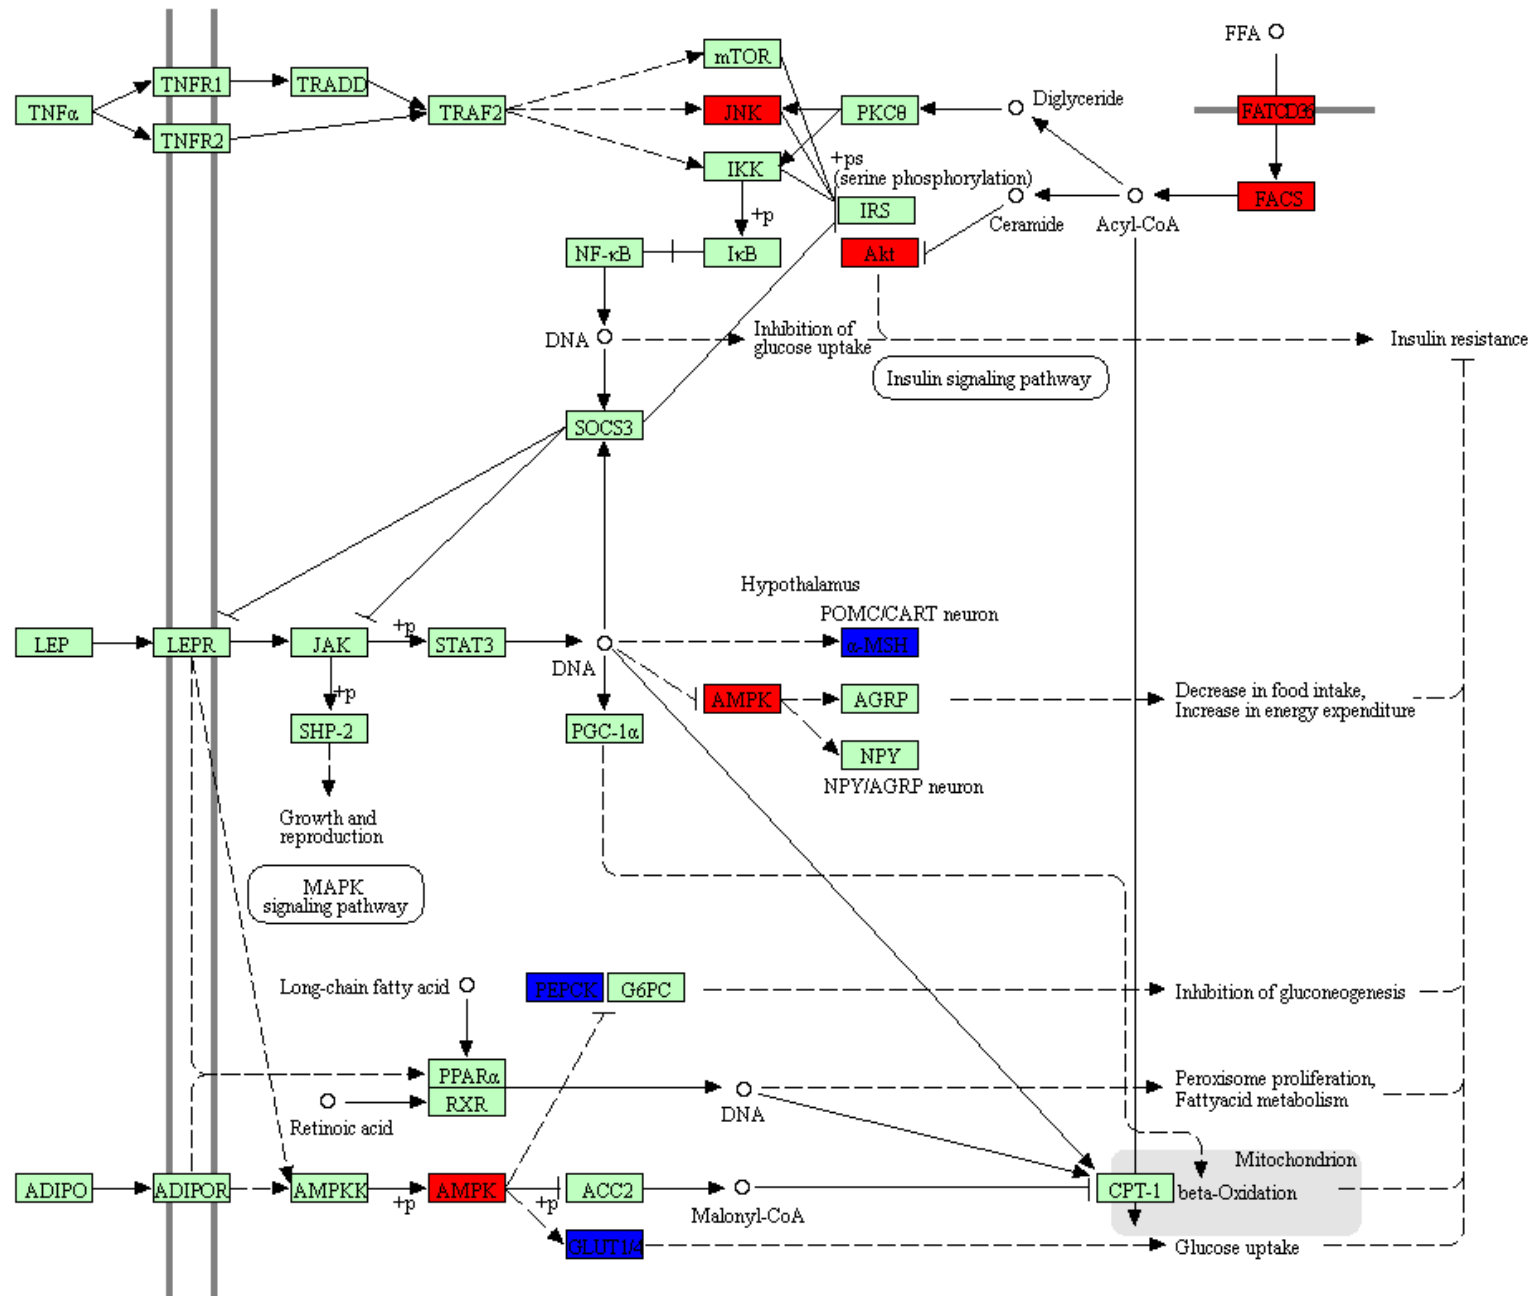

AMPHETAMINE ADDICTION

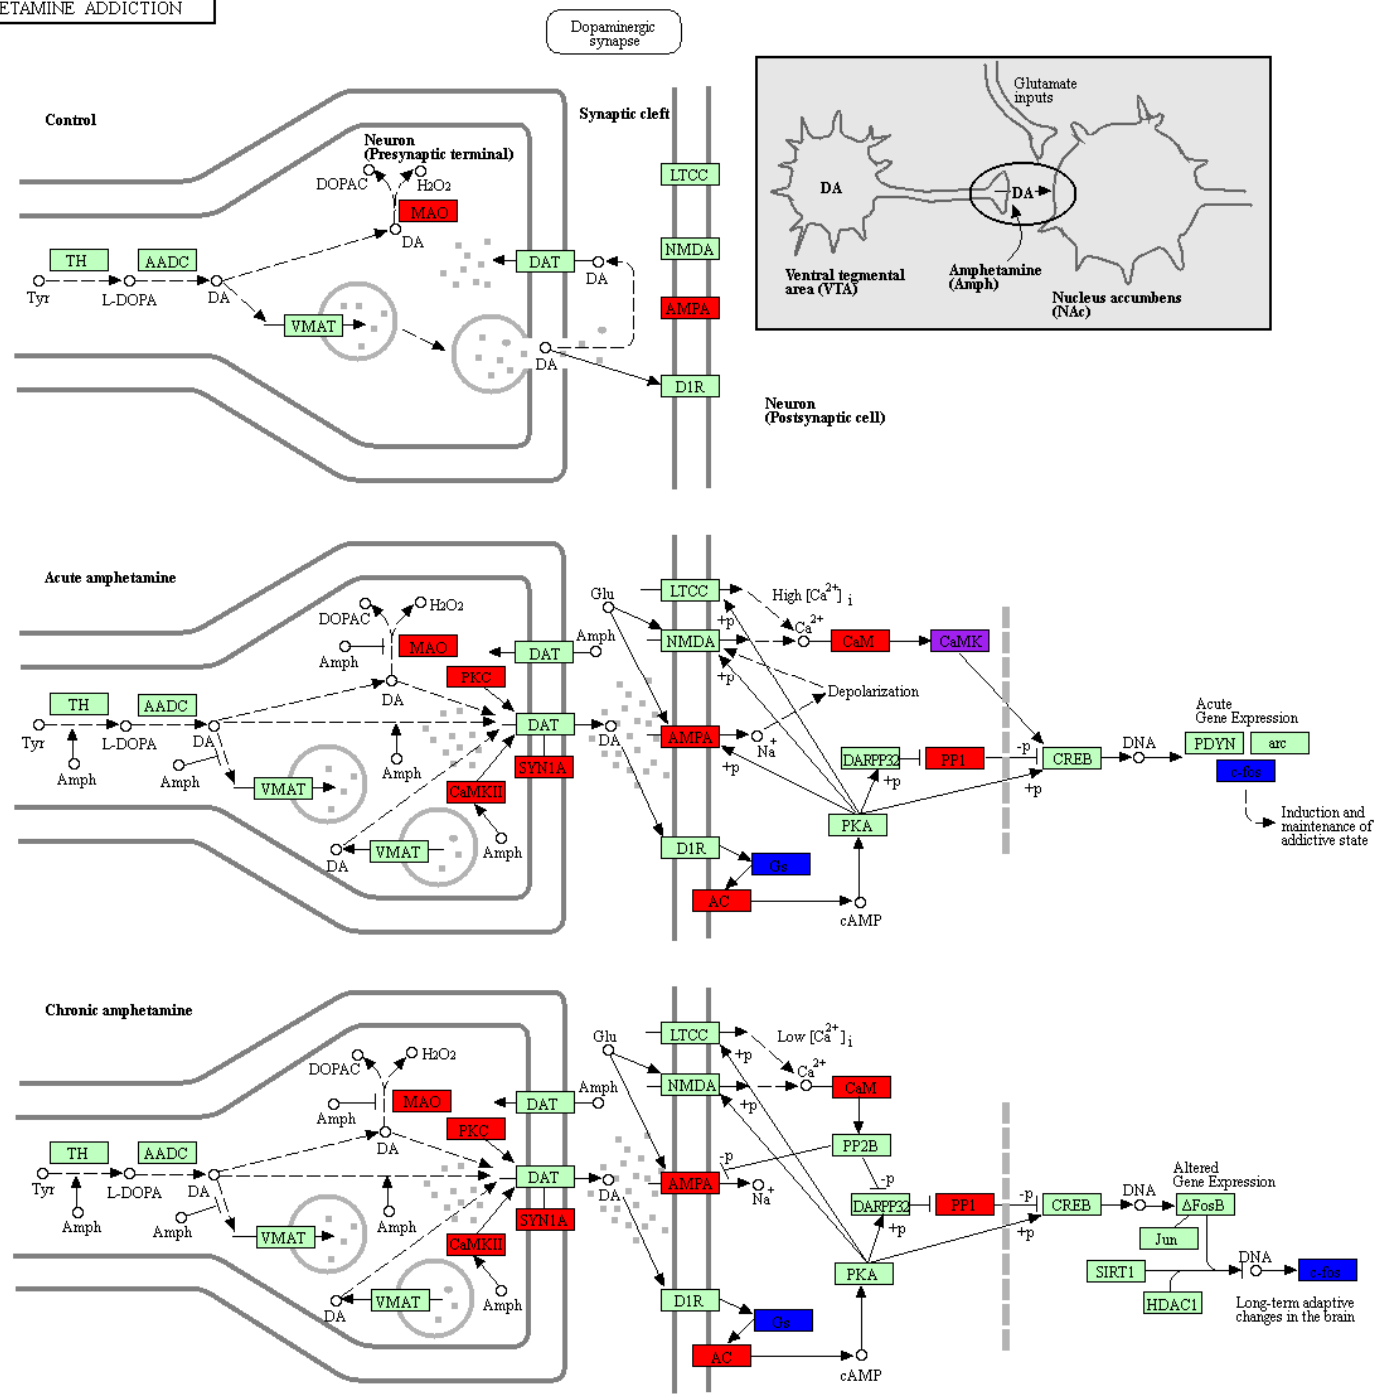





GLYCINE, SERINE AND THREONINE METABOLISM

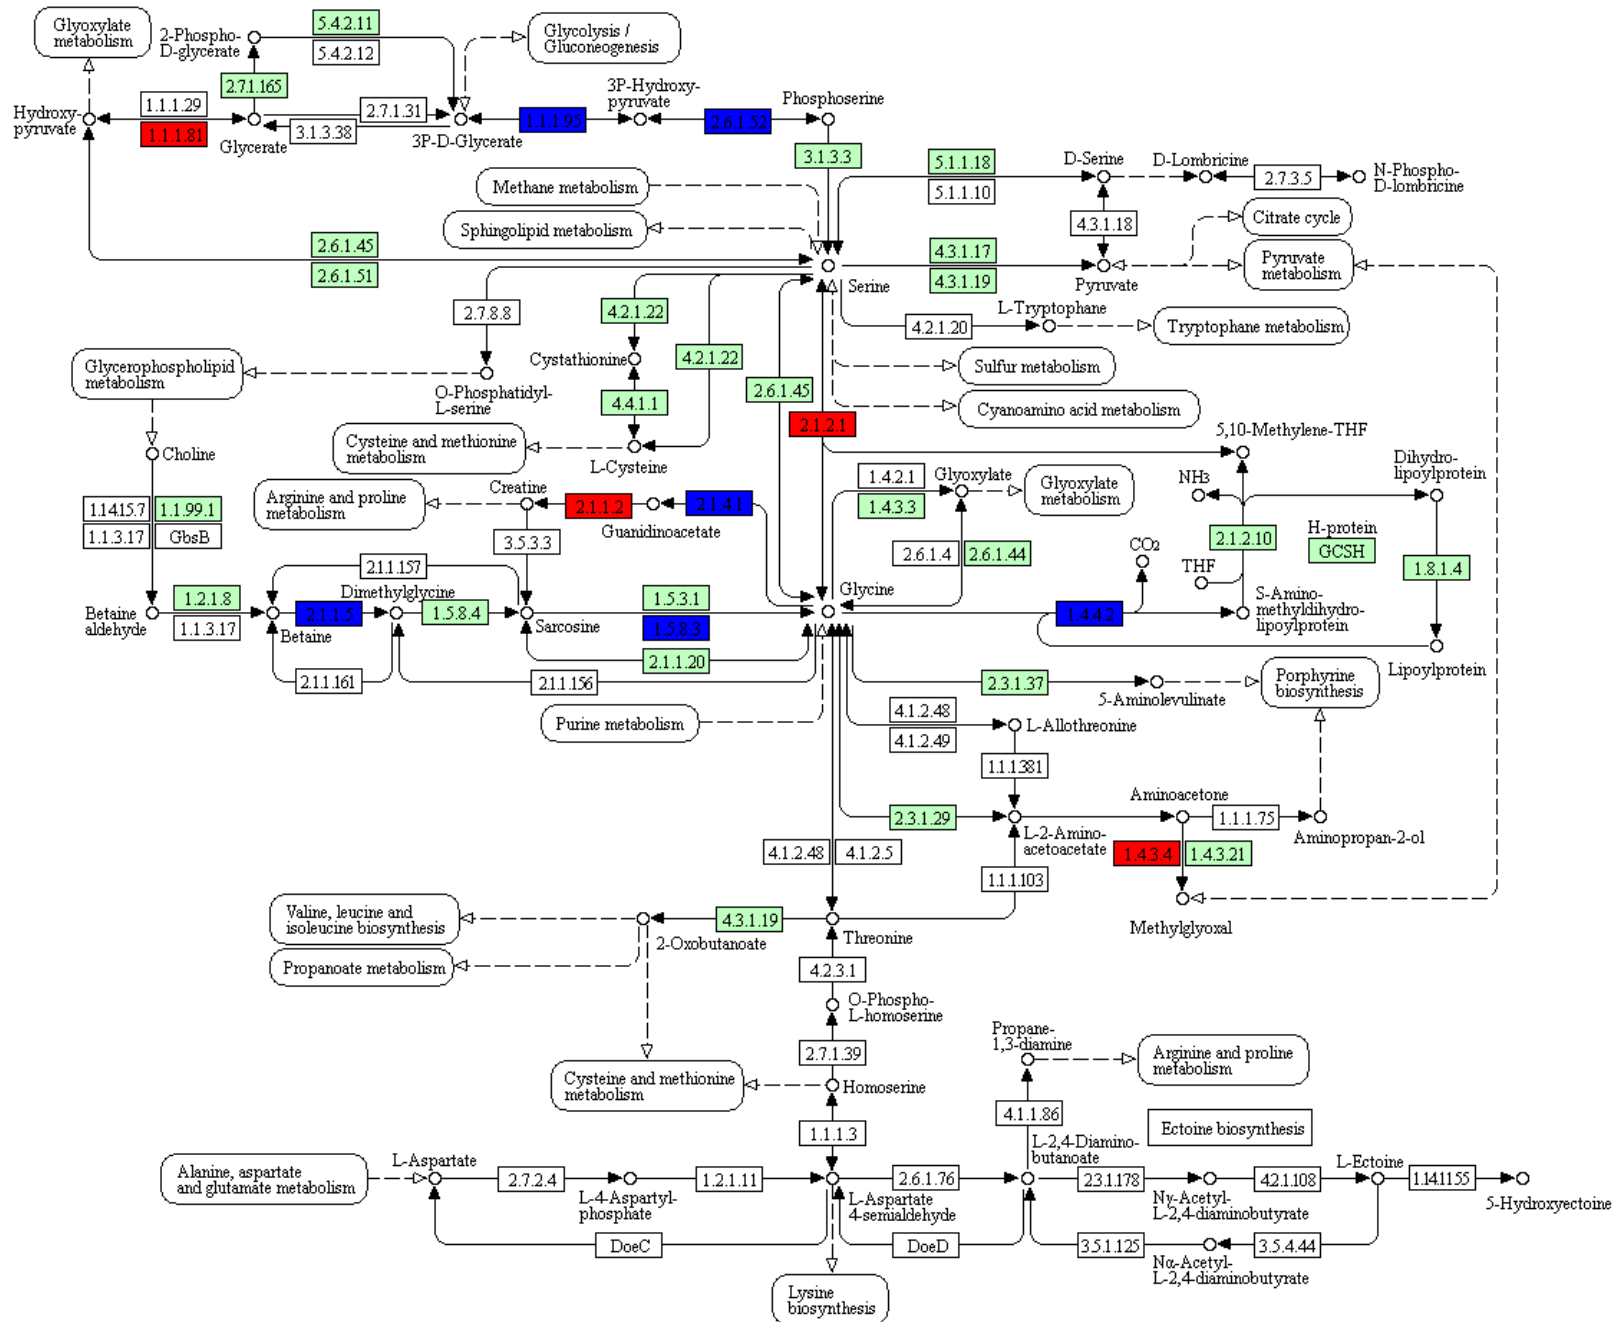

**ARGININE AND PROLINE METABOLISM**

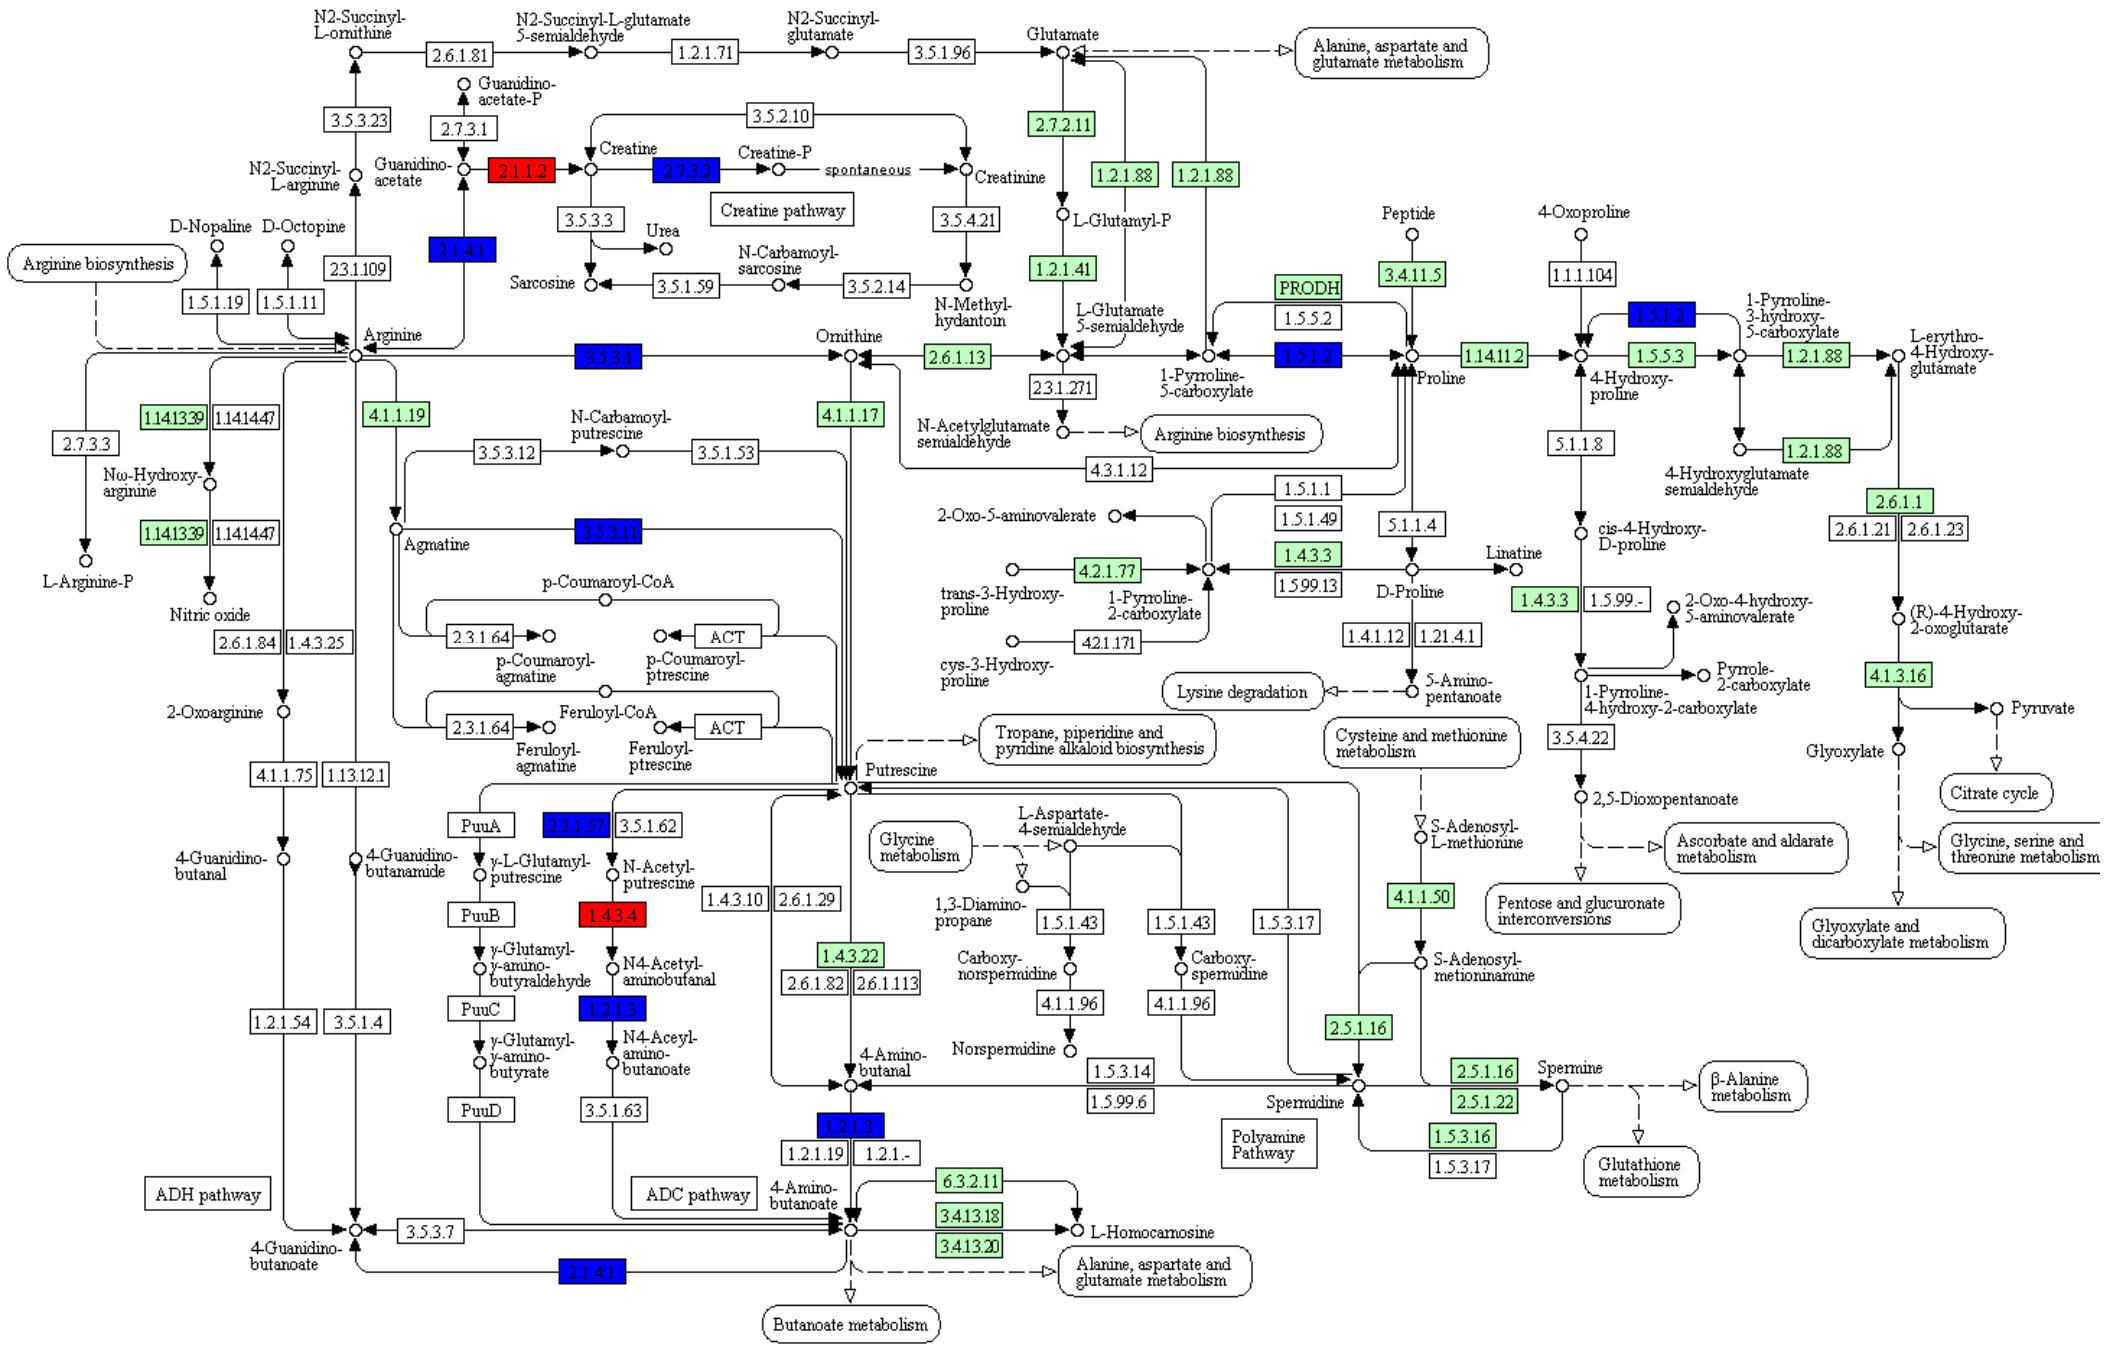

**FERROPTOSIS**

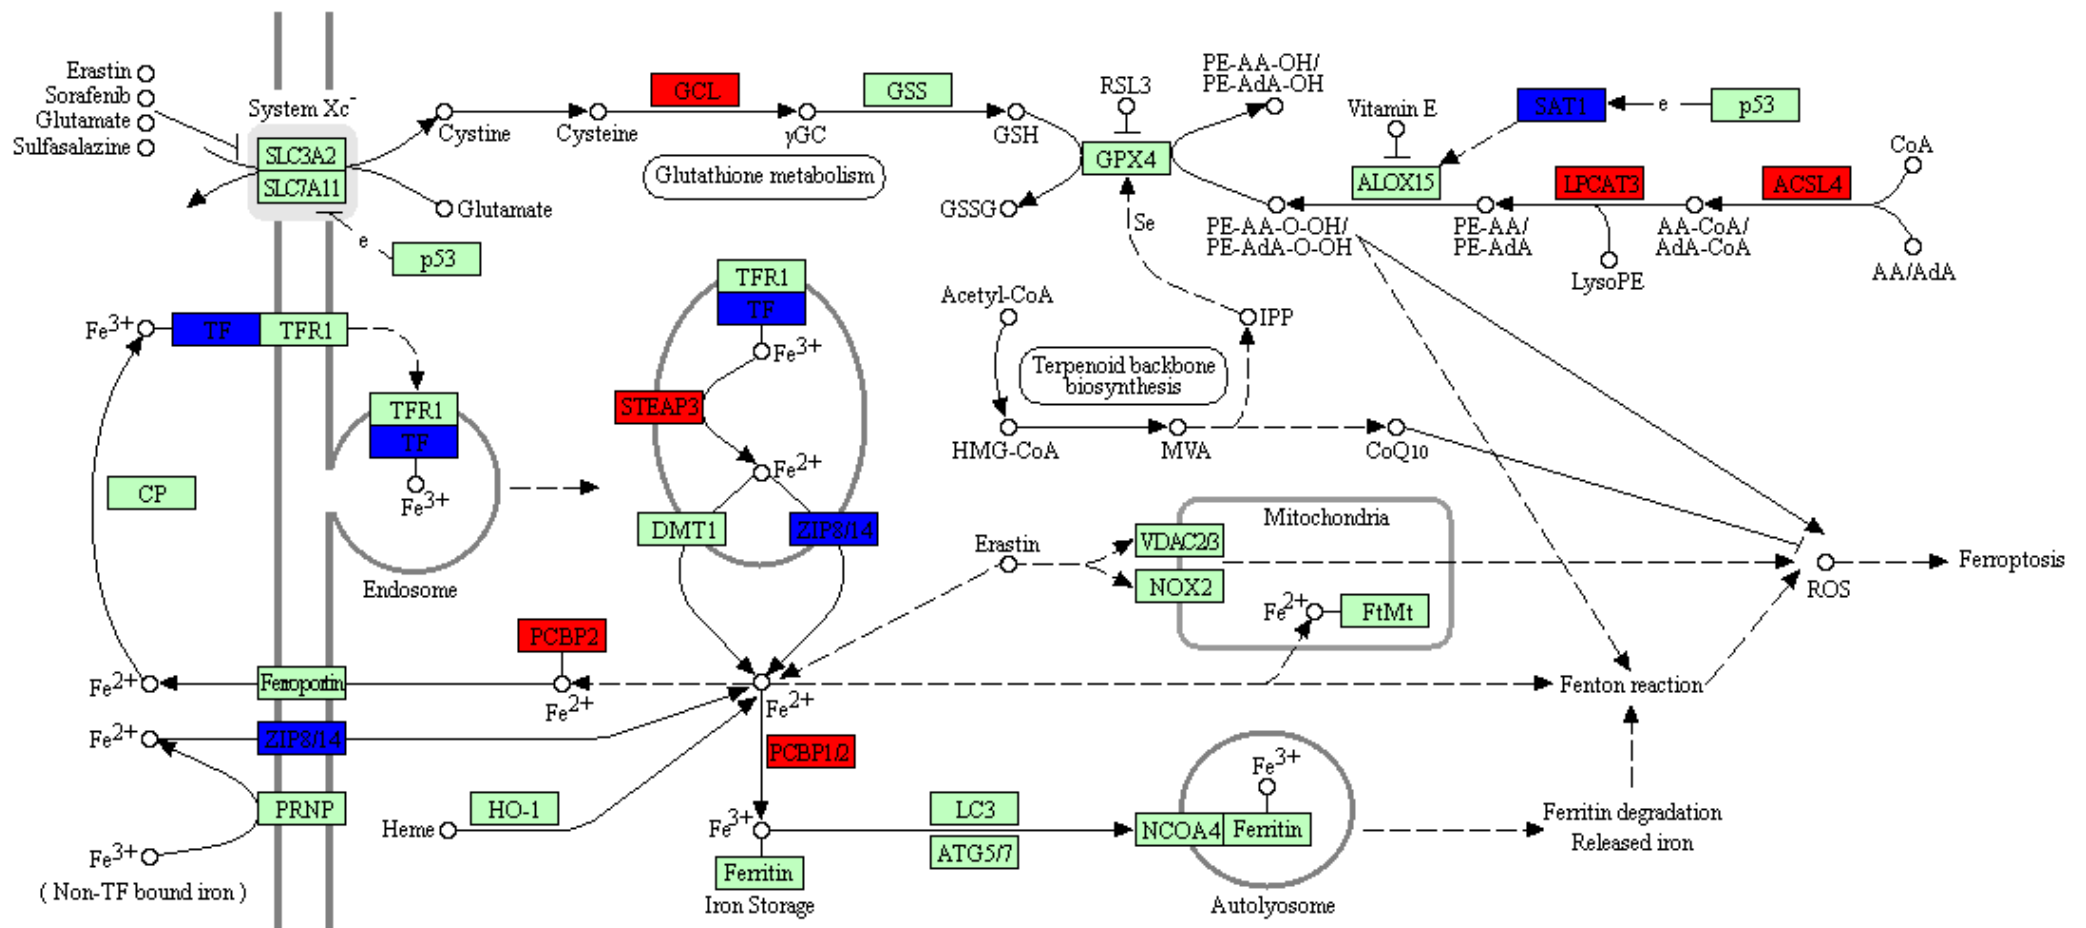

CYSTEINE AND METHIONINE METABOLISM

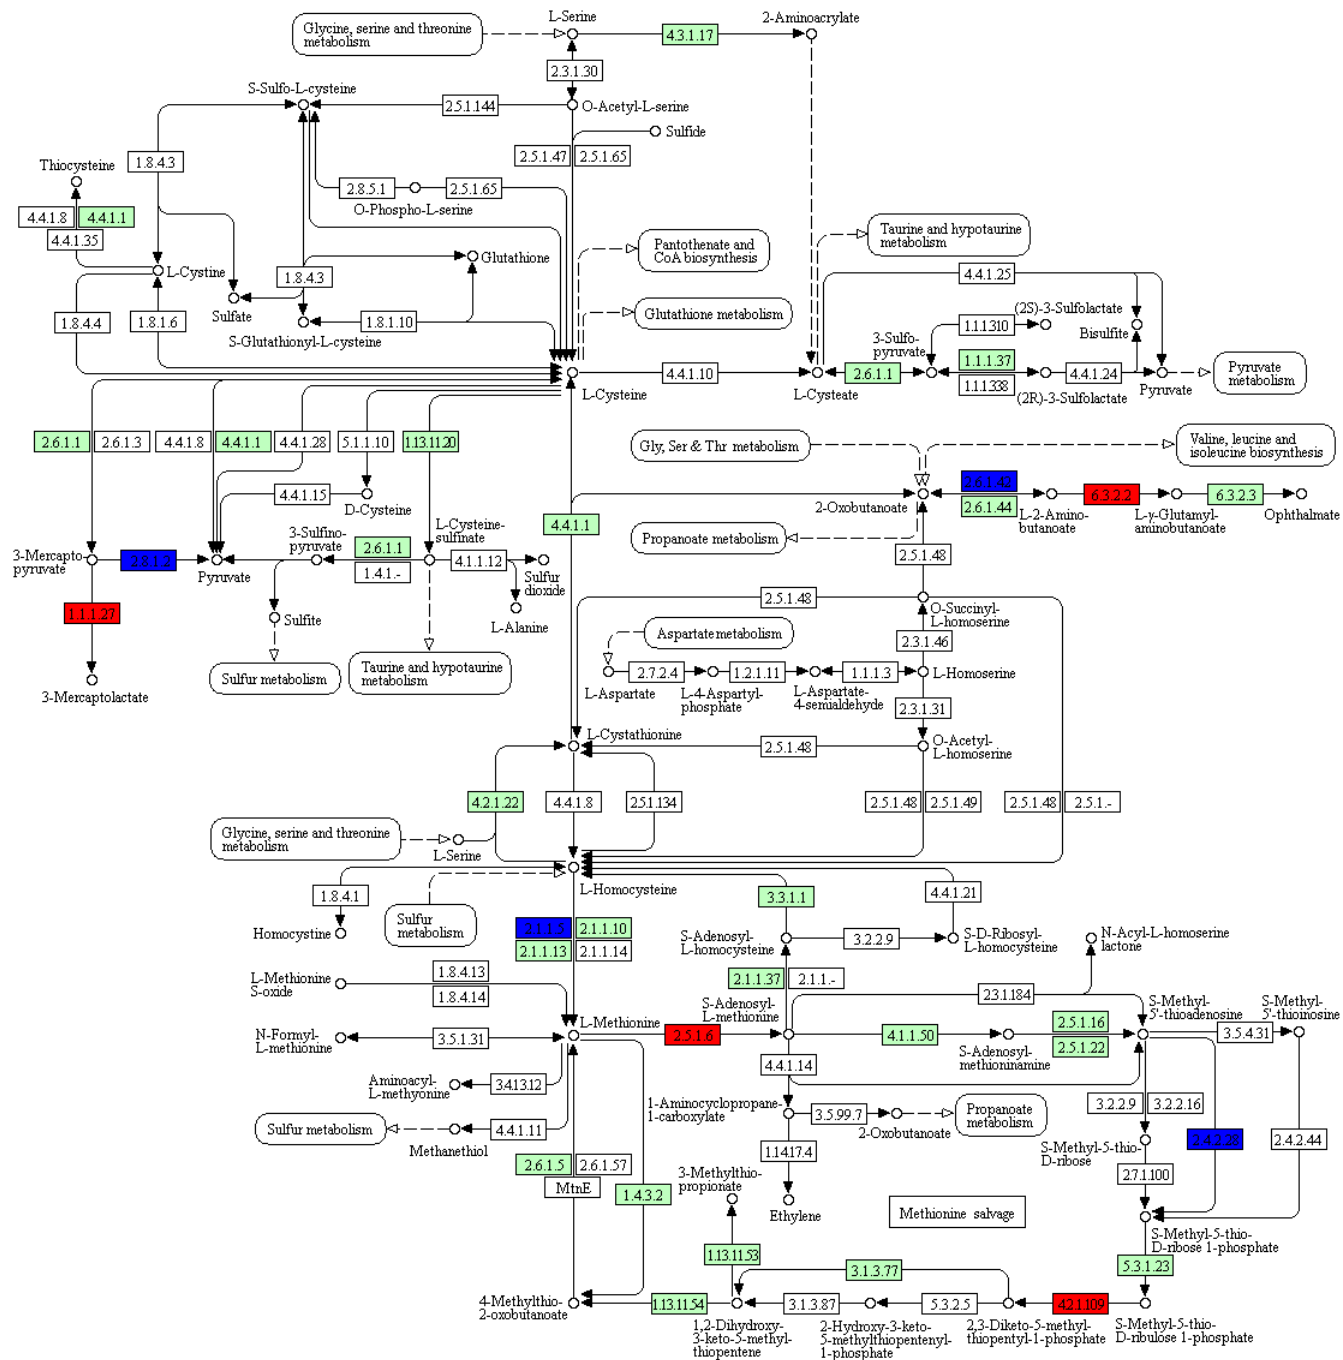



# FATTY ACID DEGRADATION

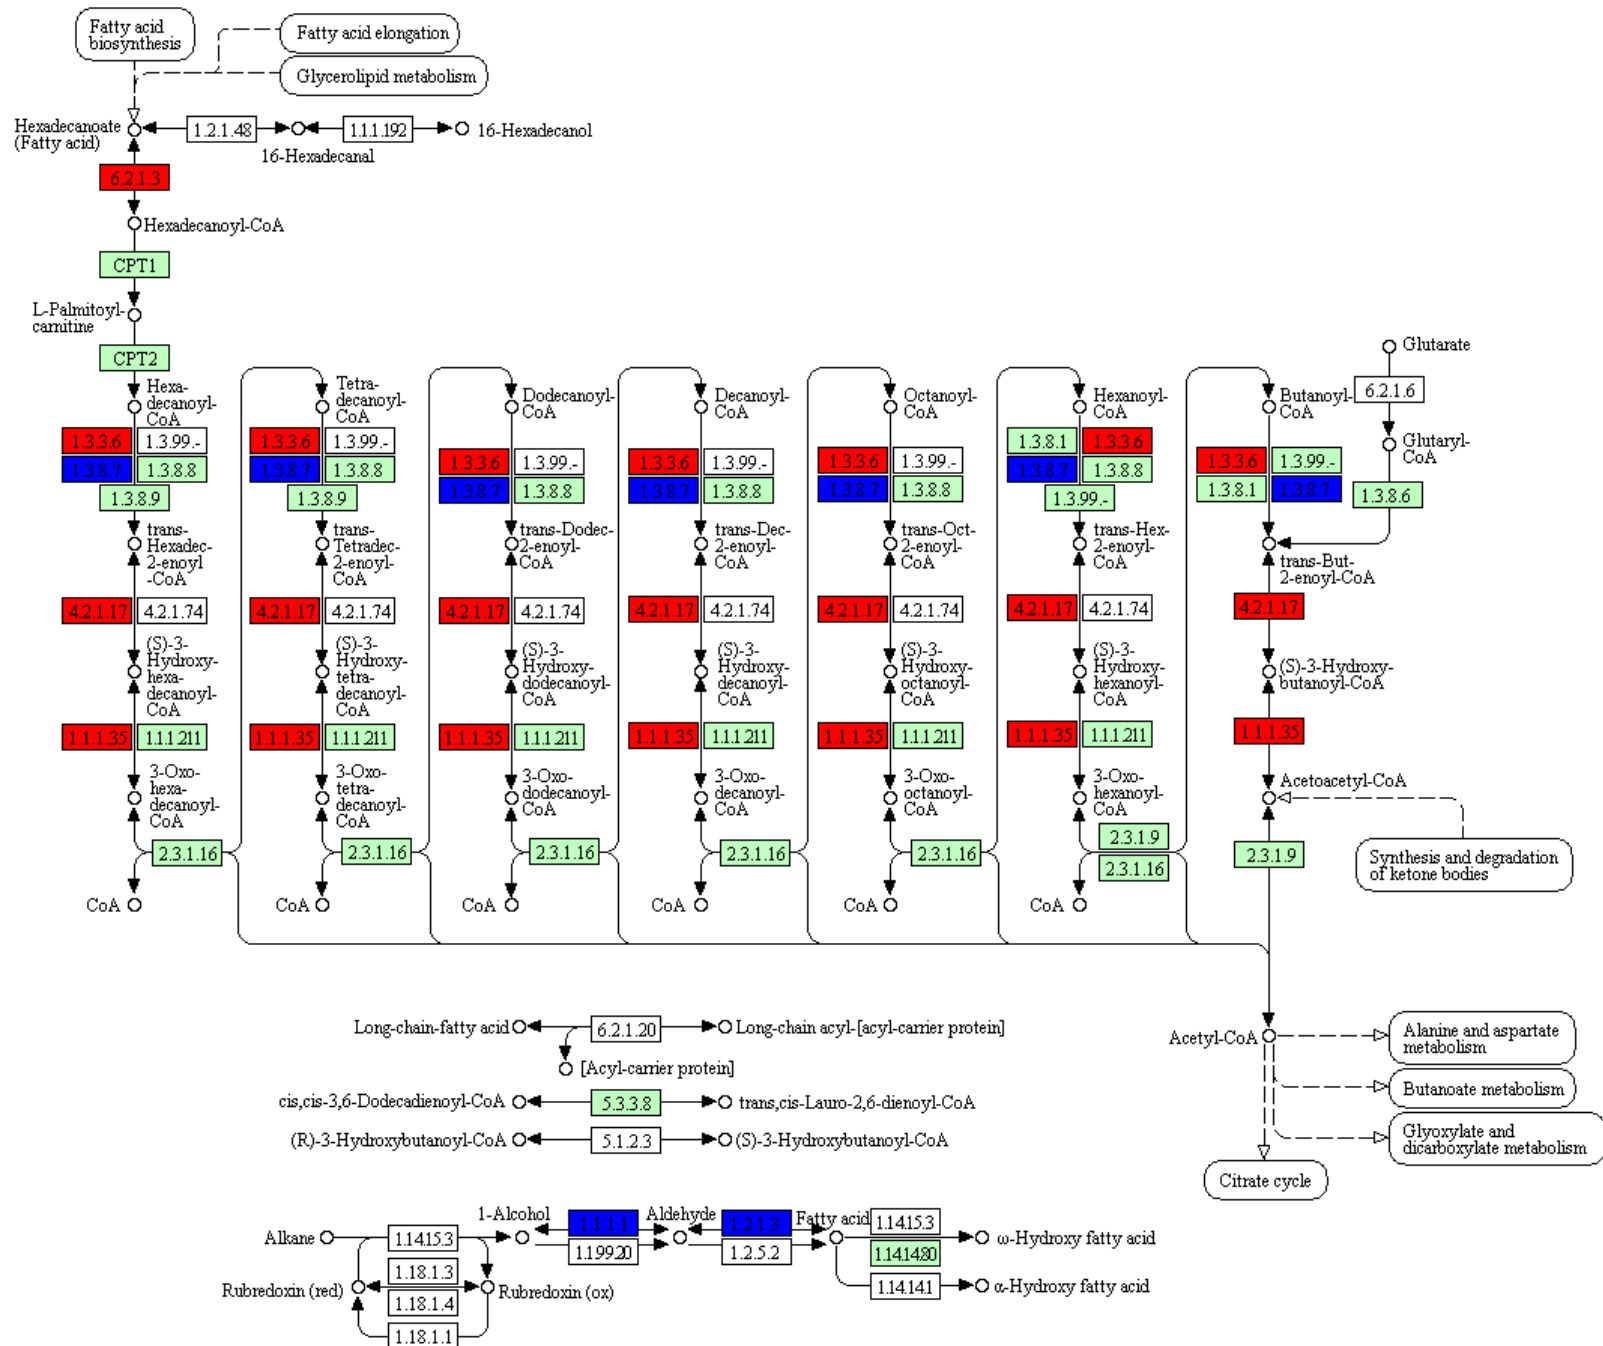

# BIOSYNTHESIS OF UNSATURATED FATTY ACIDS

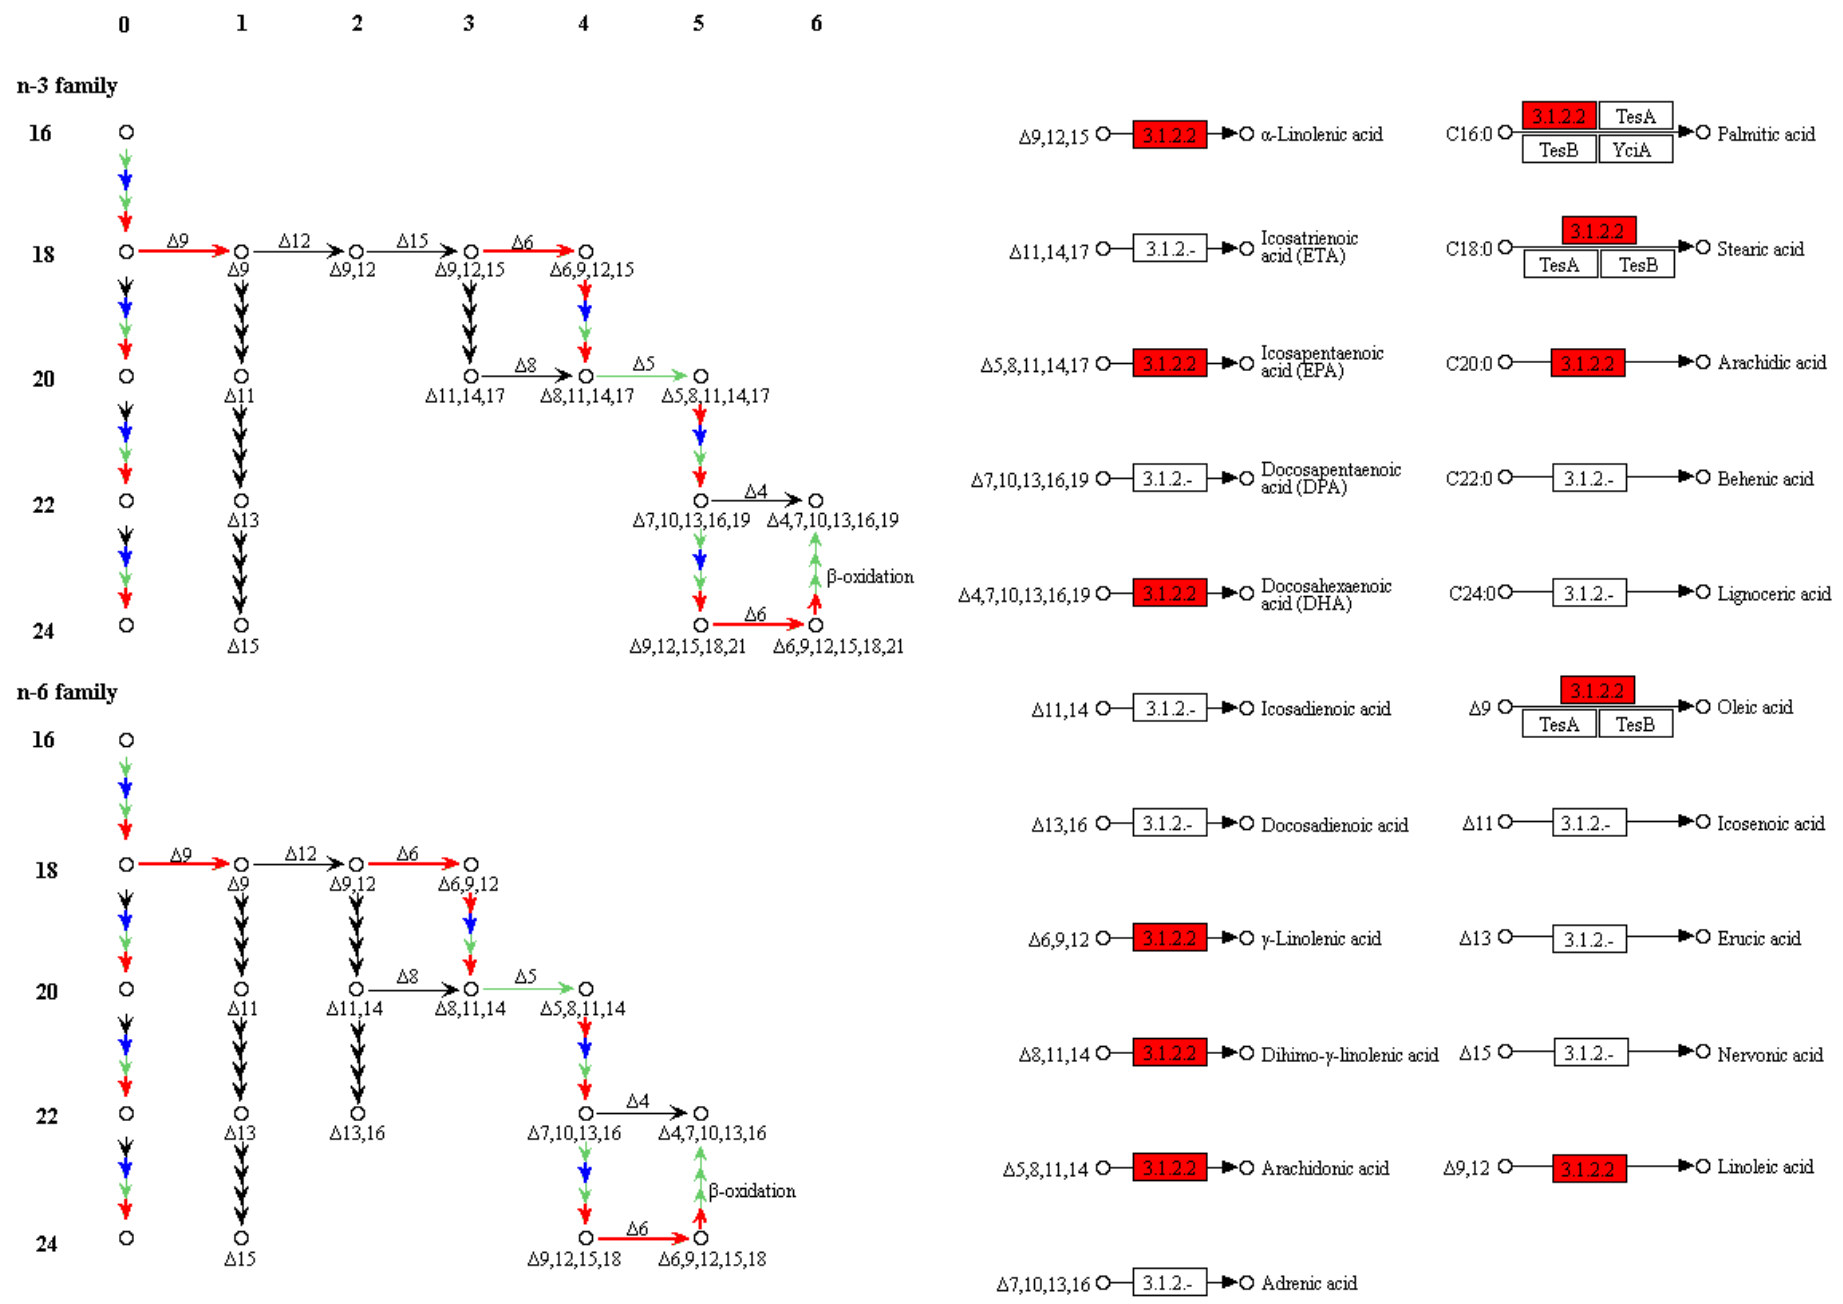

CITRATE CYCLE (TCA CYCLE)

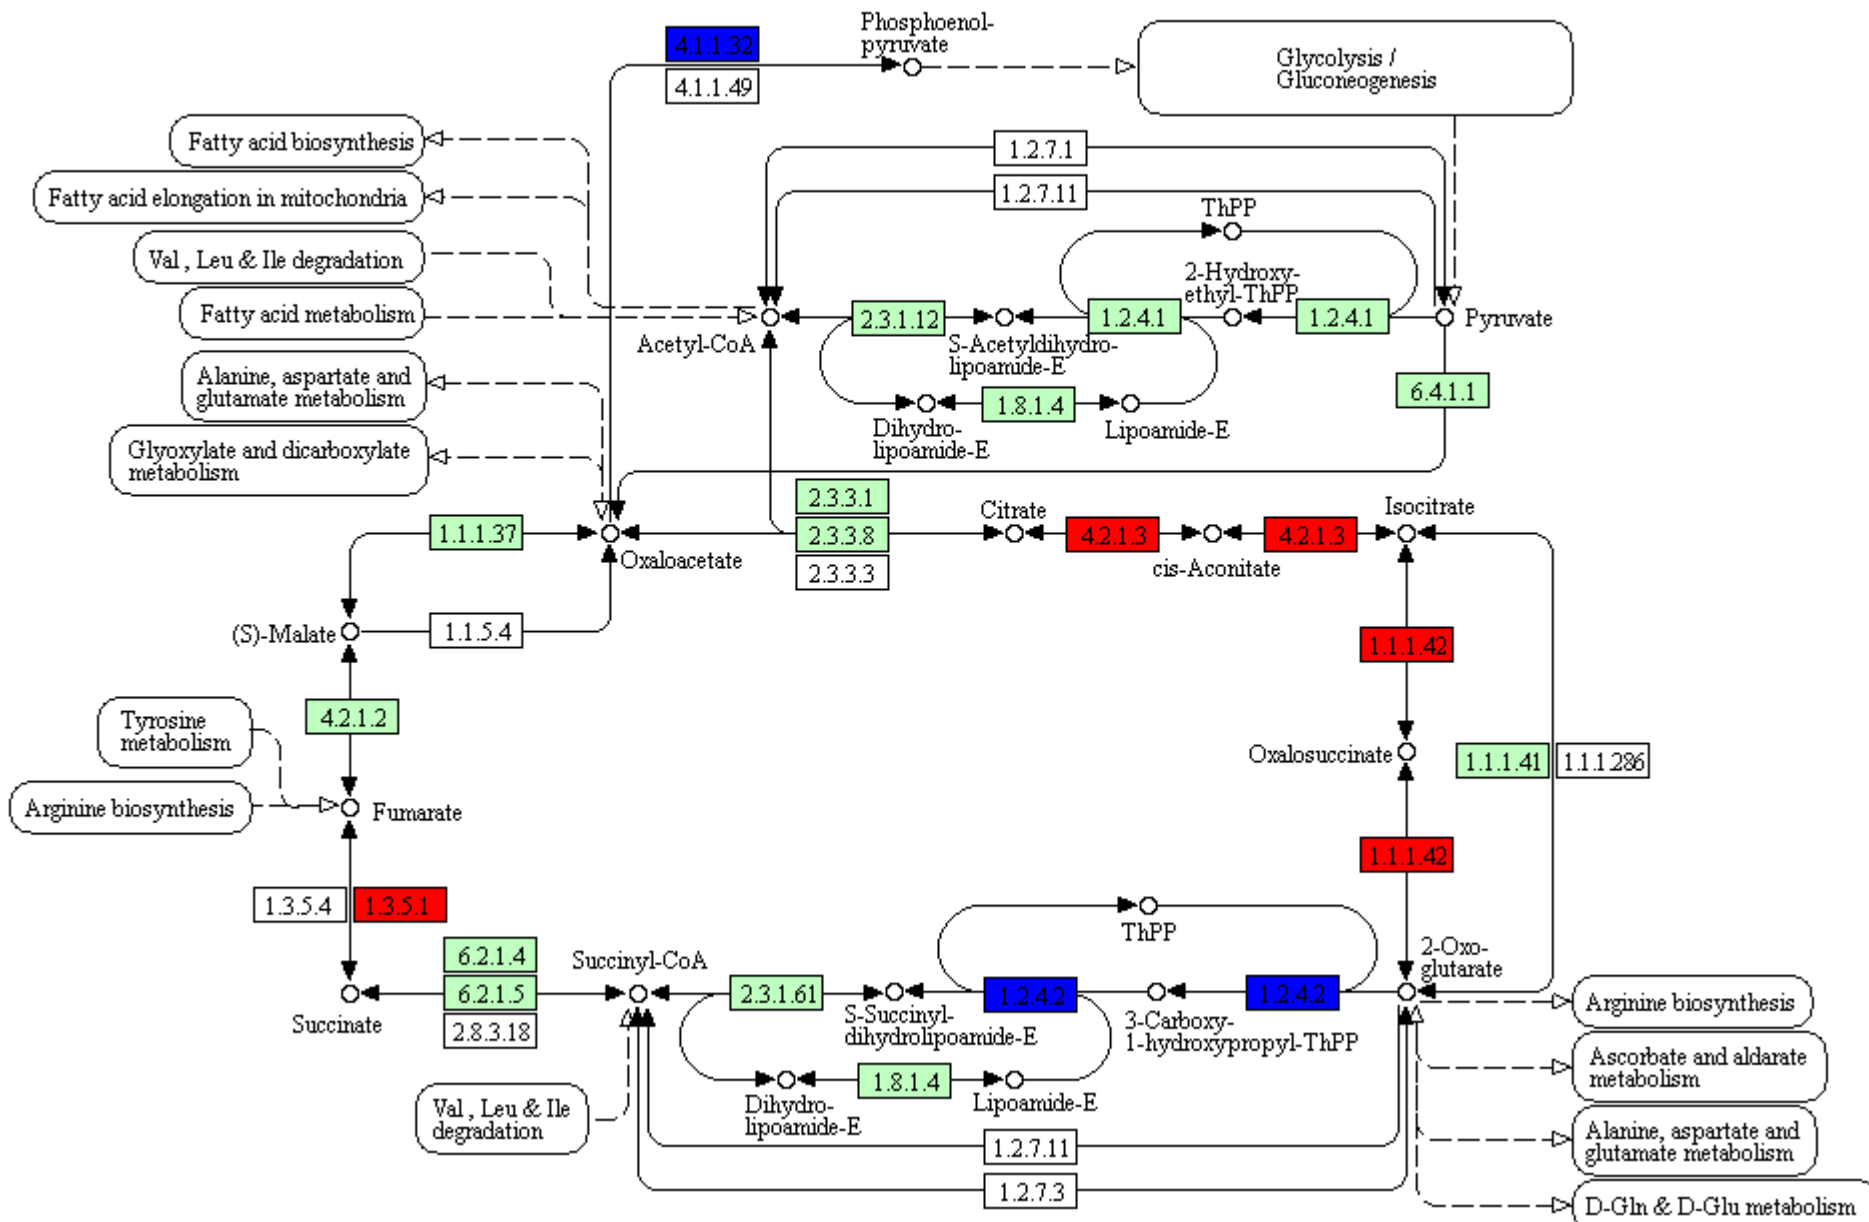





GLYOXYLATE AND DICARBOXYLATE METABOLISM

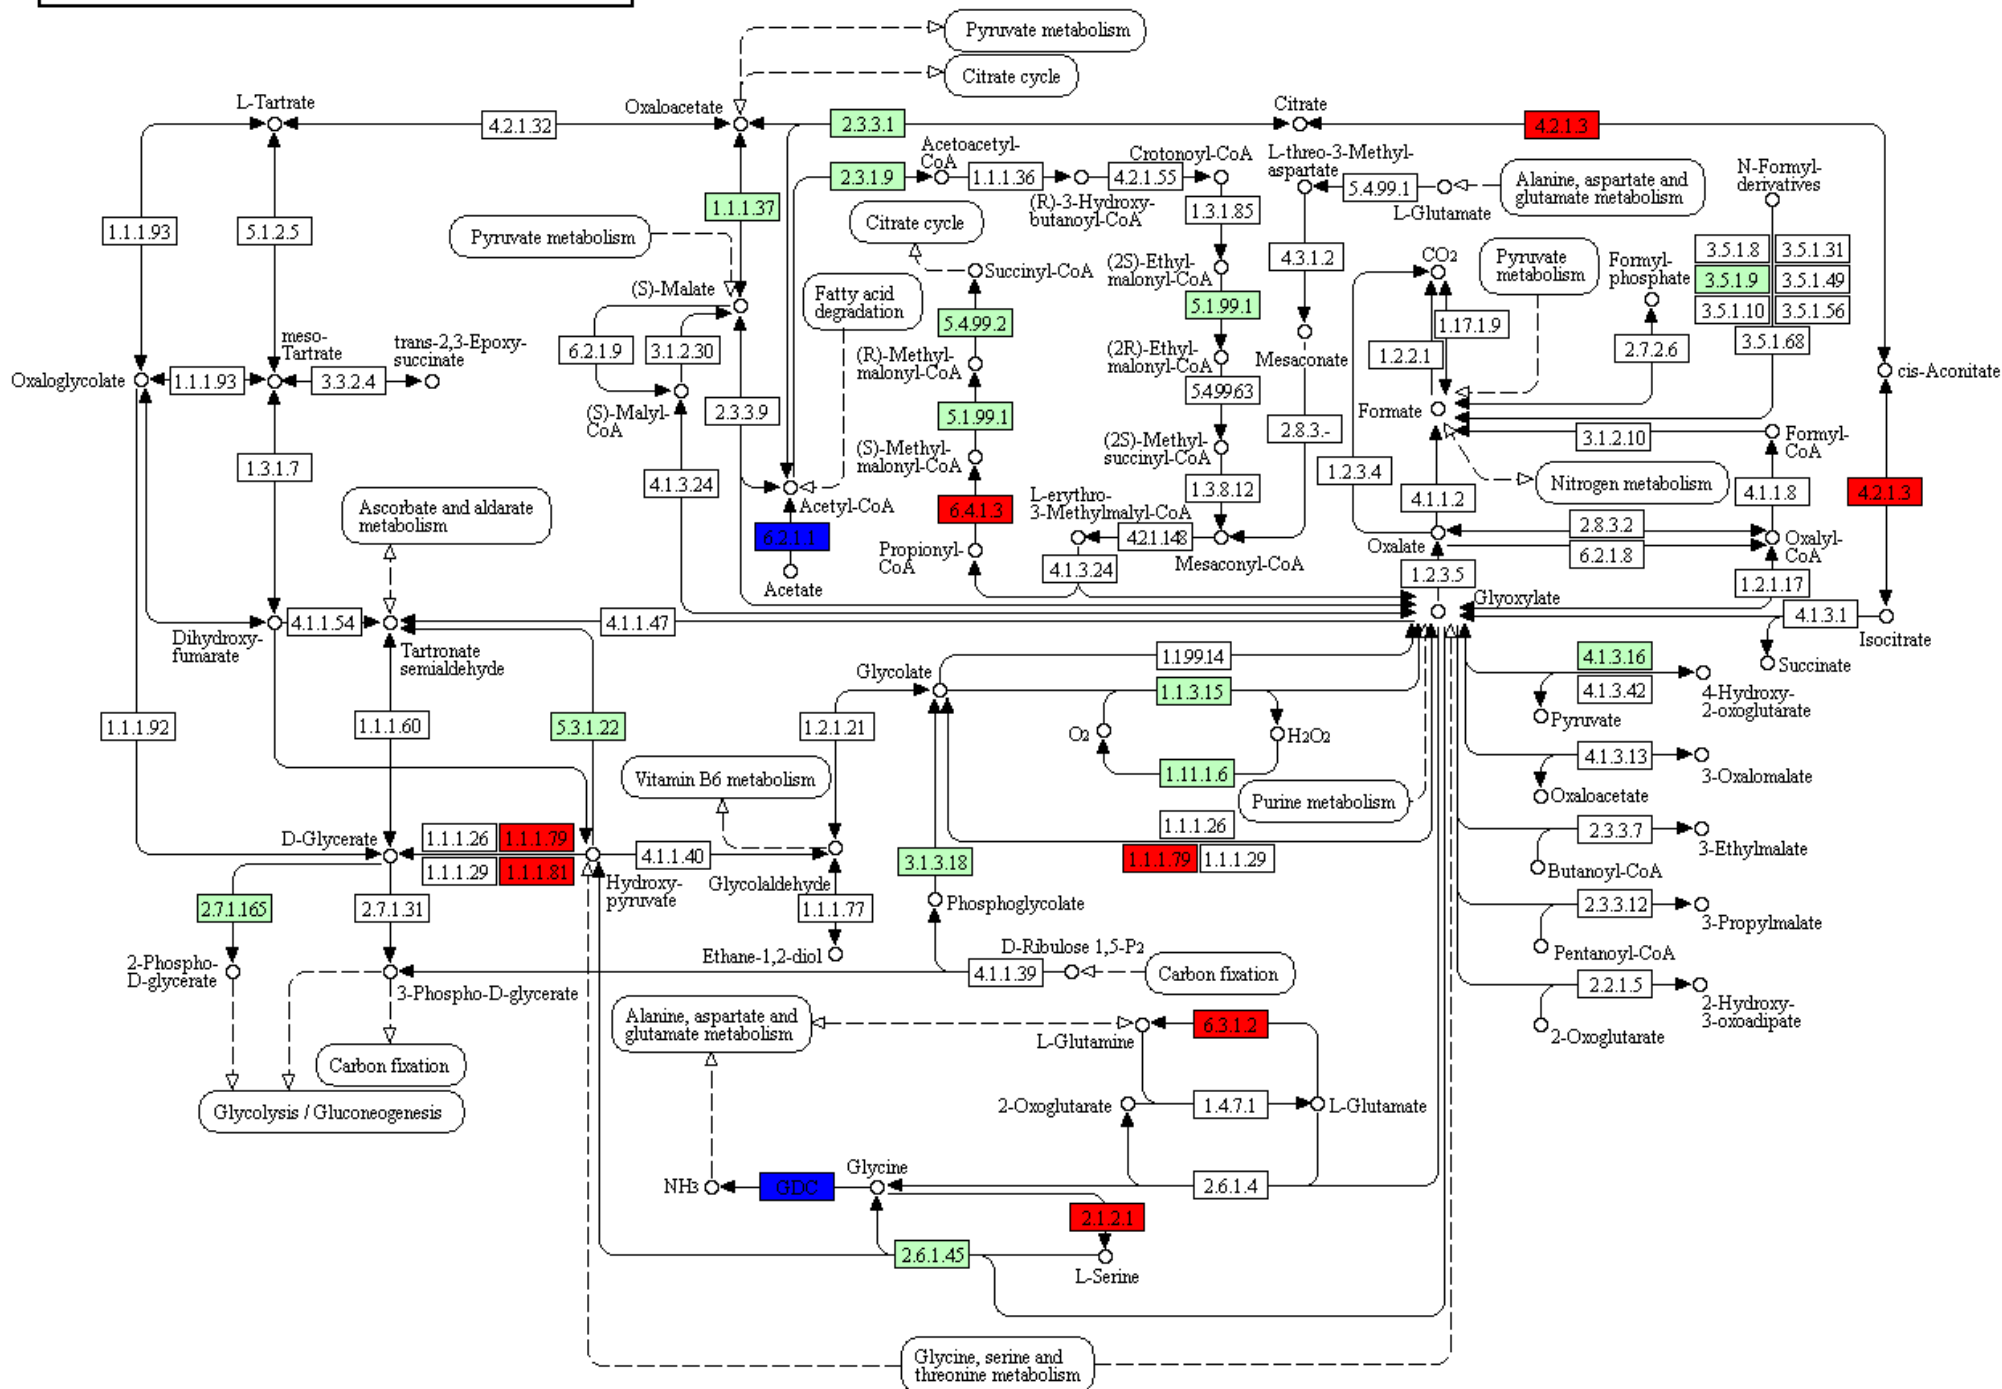

MUCIN TYPE O-GLYCAN BIOSYNTHESIS

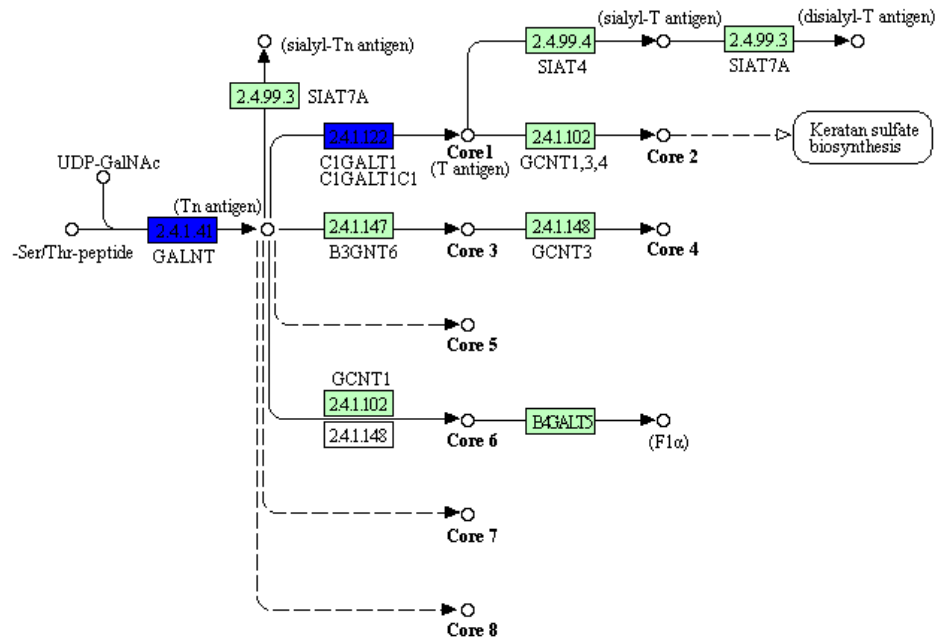

**Tn antigen**

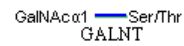

**Sialyl-Tn antigen**

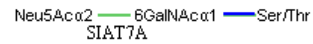

**Disialyl-T antigen**

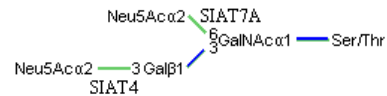

**Core 1, 2**

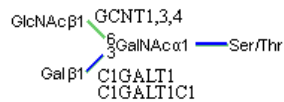

**Core 3, 4**

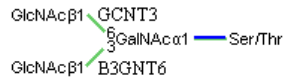

**Core 5**

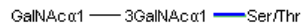

**Core 6 & F1 $\alpha$**

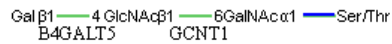

**Core 7**

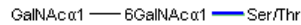

**Core 8**

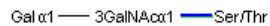

**PROPANOATE METABOLISM**

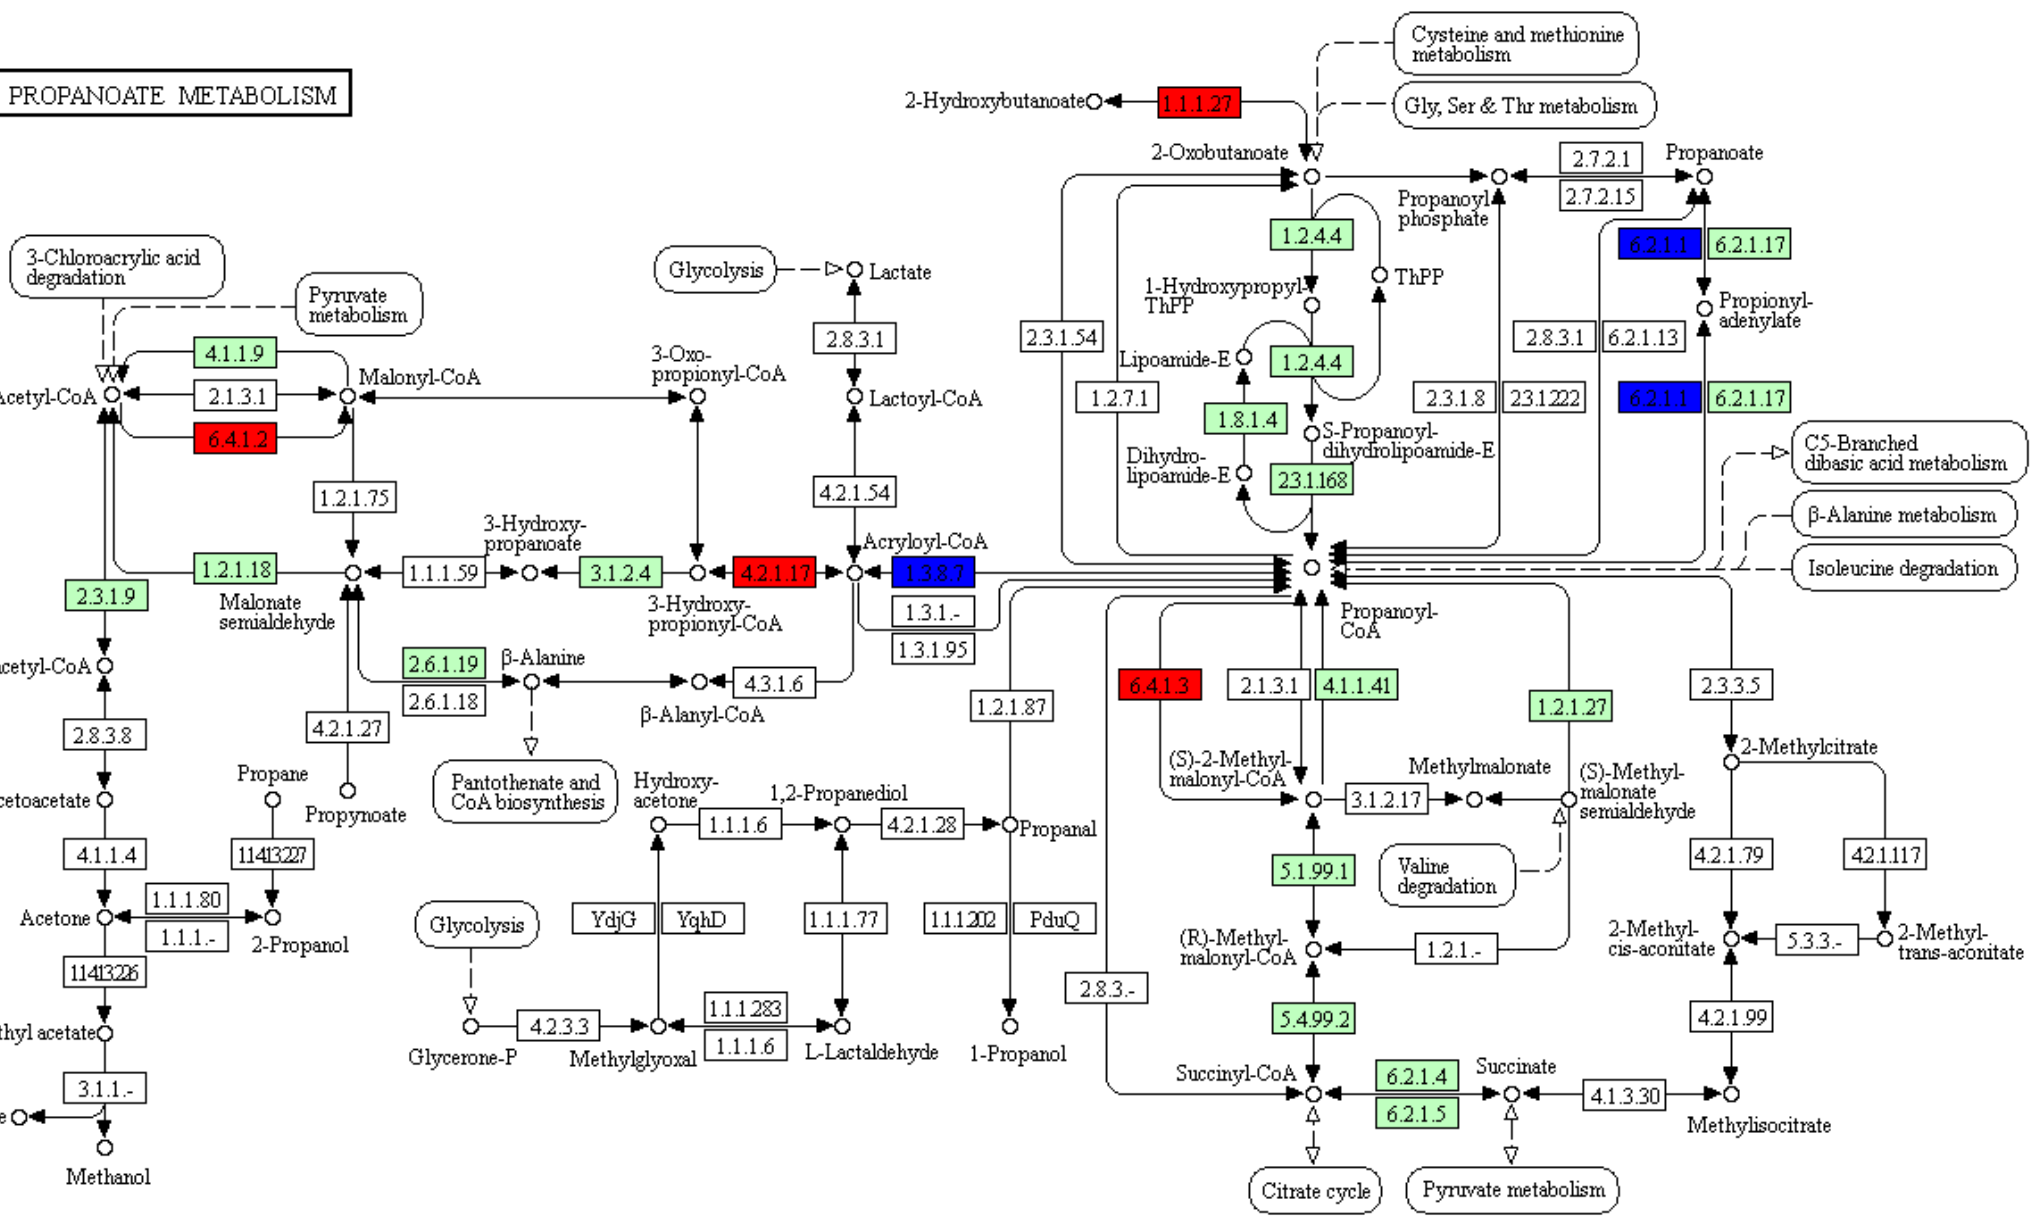

PROXIMAL TUBULE BICARBONATE RECLAMATION

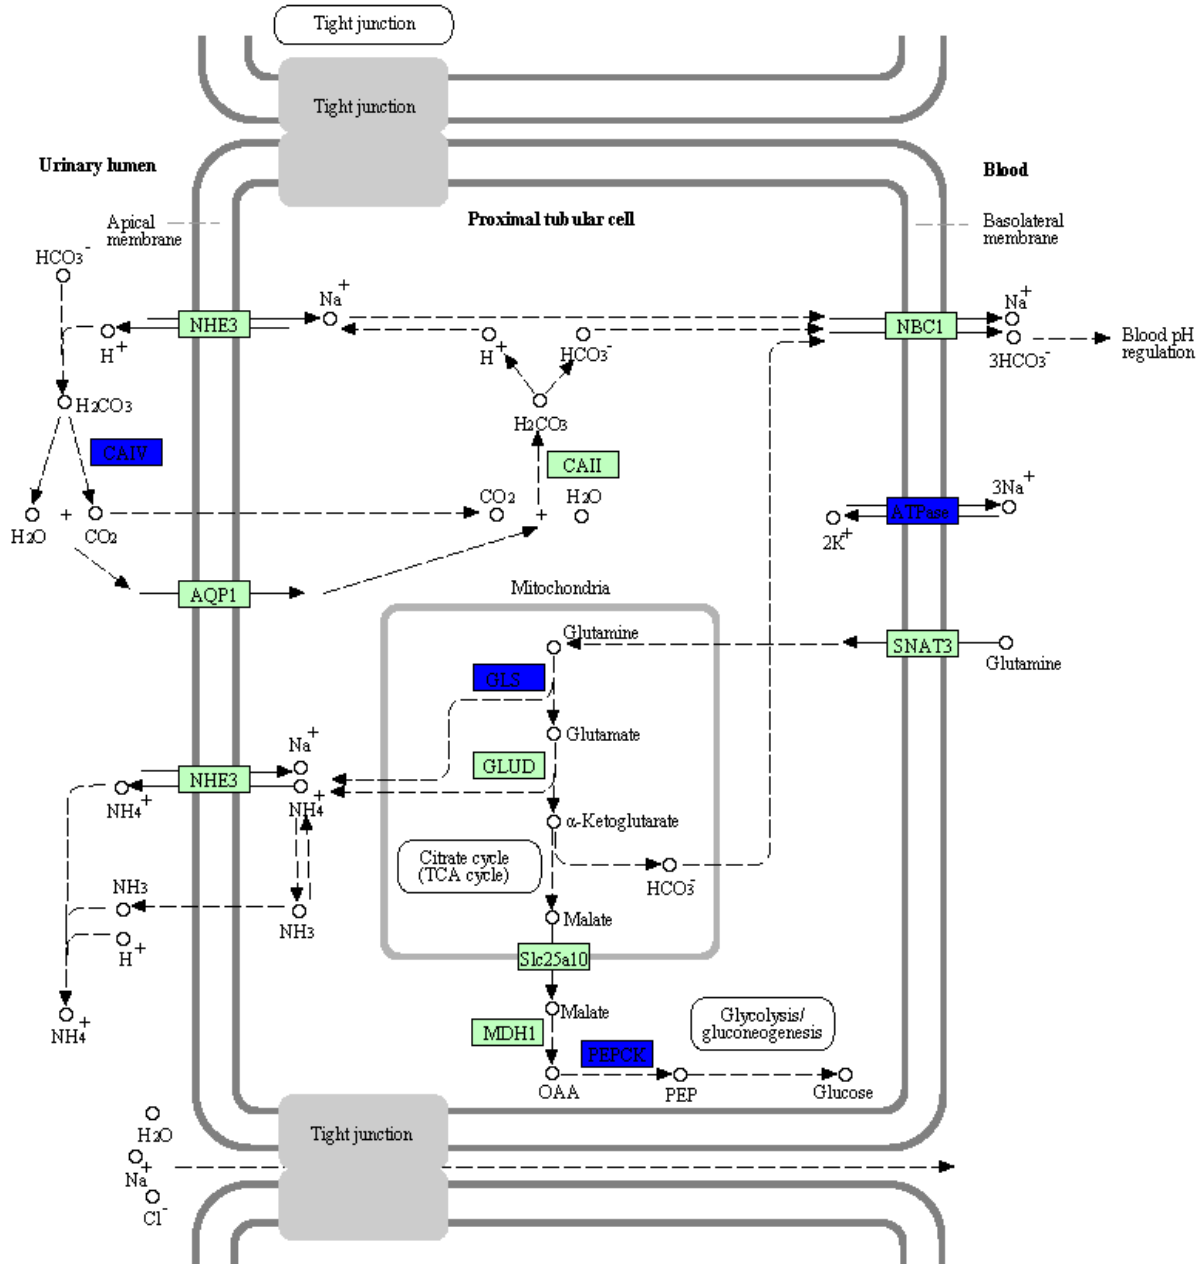

Supplement: Image_1.pdf [file Image_1.pdf]
