# Supplementary material for: Quantitative Analysis of Proteome in Non-functional Pituitary Adenomas: Clinical Relevance and Potential Benefits for the Patients
Source: Front Endocrinol (Lausanne). 2019 Dec 5;10:854. doi: 10.3389/fendo.2019.00854 (PMC6915109; doi:10.3389/fendo.2019.00854)
Supplement: Supplementary file 3 [file Table_3.xls]

## Sheet: sheet 1
Supplemental Table 3. 1789 DEGs between noninvasive NFPAs and controls
DEG name	logFC	AveExpr	t	p-value	Adjusted p-value	B
FAM5C	6.59121	7.97568	4.6855	0.00096987	0.0165291	-0.637956
C2orf80	6.14896	8.07874	10.6011	1.34e-06	0.000601081	5.93773
CRYGC	5.80763	6.65201	11.0826	9.03e-07	0.000507376	6.30946
ST8SIA5	4.48686	9.17617	14.0875	1.03e-07	0.000143355	8.26674
LGALS2	4.32033	7.87023	4.48207	0.00131255	0.0193833	-0.947685
SEMA7A	4.26121	6.73062	8.91504	6.12e-06	0.00134614	4.47741
DGAT2	4.10288	7.03992	11.8992	4.77e-07	0.000382157	6.89976
HMP19	3.97569	10.4792	3.52165	0.00591244	0.0446131	-2.48105
KIF21B	3.86215	8.65443	21.3777	2.14e-09	1.01e-05	11.2828
SLC38A11	3.80861	8.48932	8.00846	1.53e-05	0.00225147	3.57479
ZNF541	3.8027	8.89291	9.23133	4.52e-06	0.00113942	4.77178
CLCNKA	3.75508	9.12063	10.0051	2.24e-06	0.000786235	5.45112
PLA2G1B	3.67752	8.19682	6.79759	5.91e-05	0.00449537	2.21725
IDH1	3.60453	12.1974	11.0275	9.44e-07	0.000522661	6.26786
GDEP	3.59039	5.66922	4.48358	0.0013096	0.0193833	-0.945377
TRIM49	3.58104	5.44448	10.3102	1.72e-06	0.000702291	5.70397
PCDH10	3.57966	7.68556	5.69083	0.000237253	0.0084464	0.803163
NECAB1	3.55984	11.3734	10.9146	1.04e-06	0.000546292	6.18185
ADRA2A	3.52156	8.06072	3.63261	0.00493925	0.0400363	-2.29888
EPHA10	3.44672	7.74083	10.5671	1.38e-06	0.000611197	5.91077
STMN4	3.42941	6.37449	3.48458	0.00628055	0.0462228	-2.54213
CDK18	3.41054	8.05918	8.48435	9.36e-06	0.00172592	4.05986
GALNT12	3.32272	8.5822	7.06866	4.3e-05	0.00385432	2.53749
LOC157627	3.31324	5.75062	5.82839	0.000197856	0.00785818	0.98859
SLC35F4	3.28554	5.67755	6.32533	0.000104869	0.00582896	1.6353
TMPRSS9	3.25687	6.20487	3.97602	0.00285751	0.0296385	-1.74242
AIM1	3.25265	6.84544	6.56104	7.85e-05	0.00524526	1.92964
GAL3ST1	3.24624	8.47597	5.82157	0.000199634	0.0078814	0.979463
C1orf51	3.19965	9.24533	6.0884	0.000141361	0.00661195	1.33144
LPHN3	3.16996	7.62004	5.66352	0.000246039	0.00859652	0.766013
IL13RA2	3.11525	9.68046	3.41199	0.0070718	0.0497685	-2.66199
LINC00086	3.10934	11.8423	9.56408	3.32e-06	0.000976996	5.07081
DOK6	3.10823	8.48346	3.47796	0.00634869	0.0465288	-2.55304
HMGA2	3.10487	7.06966	6.66197	6.95e-05	0.00491947	2.0533
DHCR24	3.06177	8.96292	4.57919	0.00113518	0.0179784	-0.799089
NRN1L	3.0599	10.3953	4.24014	0.0018955	0.0234535	-1.3235
FAM70A	3.03526	9.20916	4.94402	0.000665982	0.0136155	-0.252985
ZNF385B	3.02006	5.92363	5.49331	0.000309344	0.00956706	0.531959
ETNK2	3.0174	7.89019	6.25718	0.000114188	0.00592881	1.54873
FAM43B	2.99725	7.87767	7.11877	4.06e-05	0.00374731	2.59562
LRRC3B	2.99325	7.49975	7.11616	4.07e-05	0.00374731	2.5926
SCN1A	2.9758	7.00101	5.96607	0.000165401	0.00715408	1.17137
SLC32A1	2.95972	14.4708	10.7413	1.19e-06	0.00057175	6.04789
CDH8	2.9584	6.00046	5.56893	0.000279283	0.00915456	0.636484
LINC00087	2.91443	13.0542	9.07968	5.22e-06	0.00121311	4.63191
AMHR2	2.91295	6.60309	4.56262	0.00116354	0.0181903	-0.824354
HPCAL4	2.90538	6.87152	4.9471	0.000663041	0.0135969	-0.248453
PVRL3	2.88082	7.34036	5.07115	0.000555541	0.0123406	-0.0672882
THRSP	2.87946	6.49897	4.95288	0.000657573	0.0135567	-0.239971
GYG2	2.86047	6.3045	11.5642	6.17e-07	0.000430053	6.66347
CDHR1	2.85961	6.92602	5.04845	0.000573726	0.0126106	-0.100273
PPARGC1B	2.85177	7.90094	16.0714	3.06e-08	6.39e-05	9.2852
VEGFC	2.85141	9.14169	6.09712	0.000139797	0.00659217	1.34277
GOLGA6L6	2.84369	8.23415	4.67062	0.000991382	0.0167106	-0.660419
HS6ST2	2.82574	7.64328	3.88352	0.00330654	0.0319694	-1.89109
HDC	2.81407	8.46378	3.44368	0.00671434	0.0482453	-2.60962
EDA	2.79622	8.41925	3.61799	0.00505732	0.040482	-2.32283
FSTL5	2.79599	10.5979	4.70102	0.000947974	0.0163185	-0.614574
CLCNKB	2.76049	6.28477	12.5812	2.88e-07	0.000278265	7.35727
FEV	2.75912	7.44894	3.77298	0.00394226	0.0353544	-2.06998
GNB3	2.74544	11.9793	5.49318	0.000309396	0.00956706	0.531785
C11orf41	2.73352	9.00084	9.31244	4.19e-06	0.00112697	4.84566
CRABP2	2.72469	10.7336	4.50873	0.0012611	0.0189567	-0.906764
CRABP1	2.71275	10.5348	5.2878	0.000410061	0.0108738	0.243586
GRP	2.69042	8.00981	7.66913	2.2e-05	0.00279087	3.21285
FILIP1L	2.67528	8.89079	6.14427	0.000131662	0.0063765	1.40382
MAOA	2.65965	9.17296	7.19317	3.73e-05	0.00359335	2.68132
NRG1	2.65818	7.35486	6.29548	0.000108845	0.00586173	1.59746
LOC643355	2.63258	8.57874	3.62196	0.005025	0.0403437	-2.31633
C11orf87	2.63198	6.02626	3.54287	0.00571197	0.0436252	-2.44614
COL2A1	2.61929	9.86577	4.51198	0.00125498	0.0189265	-0.901783
CRIP3	2.61184	8.45706	10.2421	1.82e-06	0.000728785	5.64826
FAM181B	2.58049	6.19352	7.25694	3.47e-05	0.00351519	2.7542
PTPLAD2	2.57444	7.56769	7.01862	4.56e-05	0.00397982	2.47911
KCTD14	2.57429	6.98305	4.05378	0.00252977	0.0277295	-1.61821
C12orf39	2.56233	5.58797	4.26289	0.00183048	0.0230064	-1.28783
CYP2B6	2.53739	8.48235	5.48214	0.000314069	0.00959434	0.516453
ADCY5	2.50527	9.42724	9.82064	2.64e-06	0.00084052	5.2942
FAM113B	2.47026	8.94787	5.56565	0.00028052	0.0091871	0.631966
ANO3	2.46285	6.91282	4.97287	0.000639002	0.0133823	-0.21063
TCN2	2.45683	8.12627	3.93185	0.00306332	0.0307968	-1.81329
TSPAN33	2.45302	7.75758	4.18832	0.00205291	0.0246336	-1.405
RGAG1	2.44988	6.80144	5.78441	0.000209625	0.00804098	0.929609
CDH10	2.44543	9.76844	8.15215	1.31e-05	0.00204321	3.72396
SREBF1	2.43432	11.5016	4.57635	0.00113999	0.018006	-0.803417
KCNA3	2.43144	6.38491	4.41857	0.00144432	0.0204886	-1.04556
SLC13A4	2.42783	6.96527	5.45282	0.000326852	0.0097692	0.475651
CYP11A1	2.42089	7.90259	6.32622	0.000104753	0.00582896	1.63643
RIMS3	2.41829	8.78181	3.52194	0.00590969	0.0446102	-2.48057
CNGA1	2.41132	6.56882	4.07373	0.00245224	0.0271405	-1.58645
SYNGR1	2.40457	9.53714	7.33716	3.17e-05	0.00337777	2.84515
MAD2L1	2.38371	7.51802	9.65939	3.05e-06	0.000917349	5.15451
PDLIM1	2.37586	7.55146	3.75232	0.00407463	0.0359795	-2.10354
RERG	2.36709	8.42083	4.25084	0.00186462	0.0232427	-1.30671
GLRA3	2.35533	5.48808	6.34887	0.000101844	0.0057377	1.66505
SLC44A5	2.33985	6.78823	10.9178	1.03e-06	0.000546292	6.18432
CCDC69	2.33478	7.82067	5.41992	0.000341866	0.00995699	0.429706
PDE6H	2.32344	5.18618	4.62063	0.00106742	0.0173511	-0.736085
STARD9	2.31161	9.17727	7.41057	2.92e-05	0.00321135	2.92765
GUCA2B	2.3092	8.67429	5.65708	0.000248164	0.00860682	0.757228
MST4	2.30646	12.3389	8.93045	6.03e-06	0.001337	4.49199
ENO2	2.30033	12.4668	9.8301	2.61e-06	0.00084052	5.30232
GAL3ST3	2.2843	6.60878	10.0689	2.12e-06	0.000768084	5.50461
S100A9	2.28306	7.20836	3.791	0.00383043	0.034833	-2.04073
SLC26A9	2.27075	5.94315	5.54518	0.00028837	0.00932246	0.603752
SUN3	2.26988	5.804	9.96197	2.32e-06	0.000788107	5.41468
CITED1	2.26396	13.2054	8.16864	1.29e-05	0.00203954	3.74094
CD83	2.2621	10.8333	7.5021	2.64e-05	0.00303404	3.02956
PPP4R4	2.25877	8.87798	7.23732	3.55e-05	0.00353082	2.73184
TESK2	2.25686	7.47225	7.14941	3.92e-05	0.00367911	2.631
BSPRY	2.2475	9.35445	5.52221	0.000297464	0.00944028	0.572003
CLU	2.24546	14.6516	5.52121	0.000297864	0.00944028	0.570628
KLHDC8B	2.22788	7.87706	7.22603	3.59e-05	0.00354824	2.71894
SCN3B	2.22604	8.04007	4.06341	0.002492	0.0274514	-1.60286
BTBD11	2.22191	9.40694	4.56762	0.00115489	0.0181309	-0.816715
AGBL1	2.21183	7.36788	4.48227	0.00131216	0.0193833	-0.94738
PEG10	2.1945	15.587	5.27765	0.000415871	0.0109303	0.229183
B4GALNT1	2.17135	7.18502	6.62886	7.23e-05	0.00500099	2.01289
CEP152	2.1687	6.85436	7.02236	4.54e-05	0.00397982	2.48348
TMEM178	2.16142	7.45856	8.28881	1.14e-05	0.00190862	3.86364
CYGB	2.15358	6.22939	5.03684	0.000583268	0.0127163	-0.117166
CA10	2.14615	10.2769	7.22694	3.59e-05	0.00354824	2.71998
HIST2H2BE	2.14606	9.14773	5.31376	0.000395585	0.0106966	0.28037
KREMEN2	2.13911	6.09535	3.87693	0.00334126	0.0321729	-1.90173
SLC10A4	2.13672	11.1589	3.66335	0.00470038	0.0389446	-2.2486
ECE2	2.13324	6.51081	5.20029	0.000463189	0.0114612	0.118871
KIF2C	2.12837	7.79315	8.60705	8.28e-06	0.00157855	4.18083
ACCN2	2.12474	8.35415	4.45059	0.00137621	0.019941	-0.99614
PLEKHA7	2.10397	7.21953	4.04333	0.00257141	0.0279579	-1.63486
KLF8	2.10218	7.51883	4.26361	0.00182846	0.0230012	-1.2867
TMEM35	2.09207	8.25517	4.19293	0.00203838	0.0245532	-1.39774
DLGAP1	2.08594	6.15522	3.87985	0.00332583	0.032092	-1.89702
STBD1	2.06978	6.68018	4.24737	0.00187457	0.0233113	-1.31215
HRH3	2.05543	4.76691	3.81925	0.00366181	0.0339372	-1.99494
ABCG4	2.05533	6.86186	4.01938	0.00266958	0.0285631	-1.67307
ACSM2B	2.0446	6.62797	7.63913	2.27e-05	0.00280768	3.18019
GRIK4	2.04412	4.76615	4.95682	0.000653866	0.0135042	-0.234181
SLC22A4	2.0386	8.80666	4.41111	0.00146071	0.020612	-1.0571
PLCD3	2.03555	6.05234	6.92654	5.07e-05	0.00419692	2.37082
LINGO1	2.03223	6.37329	3.93539	0.0030463	0.0306957	-1.80761
TNFRSF21	2.03155	7.0814	4.74292	0.000891444	0.0158148	-0.551611
LCN12	2.03096	7.99744	4.34264	0.00162056	0.0216222	-1.16331
SAA2	2.02927	8.77142	3.89021	0.00327169	0.0317876	-1.88031
PCYT1B	2.02687	7.0549	5.90678	0.000178613	0.00740682	1.093
RAPGEFL1	2.02071	7.17369	5.04747	0.000574522	0.012615	-0.101693
APOBEC3G	2.01911	8.36192	6.13057	0.000133973	0.00643034	1.38611
HIST1H2AC	2.01054	11.4353	4.07561	0.00244505	0.0270849	-1.58345
CHST4	2.00379	8.20292	7.41402	2.91e-05	0.00320841	2.9315
C11orf93	1.9998	6.96488	5.31402	0.000395444	0.0106966	0.280734
ARHGAP20	1.99461	7.3571	6.88518	5.33e-05	0.00427153	2.3218
DTX1	1.99431	9.13445	6.31391	0.000106372	0.00583299	1.62083
PBK	1.99259	6.23391	4.191	0.00204446	0.02458	-1.40078
EPB41L4B	1.98399	5.46956	3.48338	0.00629282	0.0462475	-2.5441
PRSS58	1.97732	5.01623	4.88211	0.00072808	0.0142093	-0.34429
CLEC2L	1.97682	4.40589	4.0527	0.00253401	0.0277517	-1.61991
NR5A1	1.96938	7.36907	5.51842	0.00029899	0.00944028	0.566771
CSRP2	1.96858	13.8394	4.08205	0.00242066	0.0269576	-1.57323
C4orf49	1.96669	11.8826	6.7317	6.39e-05	0.00466532	2.13791
ARNTL2	1.9613	8.47248	4.25341	0.00185728	0.0232066	-1.30268
LSAMP	1.95611	7.39719	5.57409	0.000277352	0.00911507	0.643578
TMEM229B	1.94442	6.70021	5.17589	0.000479289	0.0115826	0.0838885
LOC100129397	1.94359	6.12008	4.01218	0.00269985	0.0287246	-1.68457
ZNF135	1.93599	7.54829	8.81601	6.74e-06	0.00140802	4.38314
PRR22	1.93295	7.35381	7.00683	4.62e-05	0.00401604	2.4653
GSG1L	1.93178	5.19006	3.63438	0.00492517	0.0399686	-2.29598
SNX12	1.92886	7.68328	6.04944	0.000148579	0.00679346	1.2807
ZMYM3	1.92754	9.84755	7.55004	2.5e-05	0.00294076	3.08252
ELOVL7	1.92454	8.46469	3.52394	0.00589048	0.0445009	-2.47728
HIST2H2AA4	1.9211	13.9616	5.342	0.00038046	0.0104731	0.320266
CTSS	1.91945	9.07266	3.45079	0.00663671	0.0479254	-2.59787
SLC12A5	1.91583	7.94382	6.48964	8.56e-05	0.00534122	1.84131
SHC3	1.91033	6.98565	3.74272	0.00413778	0.036268	-2.11917
CYP4F2	1.90895	6.70815	4.47934	0.00131795	0.0194336	-0.951883
MUSK	1.90766	5.34654	5.6818	0.000240122	0.00846549	0.790886
EPS8	1.89862	10.8319	4.44494	0.00138798	0.0200344	-1.00486
FRMPD1	1.89786	7.10926	4.41201	0.00145871	0.020612	-1.0557
DUSP10	1.8964	5.55373	5.61518	0.000262461	0.00886573	0.699984
LOC151658	1.892	5.19922	3.77571	0.00392512	0.0352764	-2.06555
CASK	1.88865	11.314	5.2794	0.000414863	0.0109303	0.231668
C14orf162	1.88864	8.10984	5.37642	0.000362864	0.0102205	0.368721
ORC6	1.888	7.29782	3.80274	0.00375939	0.0344702	-2.02169
FONG	1.88394	6.38162	5.99478	0.000159387	0.00704286	1.20913
XYLT1	1.87721	5.99006	5.53496	0.000292378	0.0093531	0.589636
APBA1	1.87355	6.69238	9.25711	4.42e-06	0.00113811	4.79533
LOC441666	1.87255	6.05349	5.26792	0.000421525	0.011	0.215362
SETD5	1.86306	6.92292	6.52425	8.21e-05	0.00532049	1.88422
FAM84A	1.85885	5.07181	4.27429	0.00179878	0.0227983	-1.26998
KIAA1456	1.85788	6.48302	4.78525	0.000837968	0.0153593	-0.488257
PITX2	1.85672	12.8351	4.47527	0.00132603	0.019492	-0.958137
PPBP	1.85325	7.2898	4.68558	0.000969765	0.0165291	-0.637846
SEC14L4	1.84878	6.90974	3.59755	0.0052273	0.0413192	-2.35633
SPSB2	1.84181	10.6063	5.02566	0.000592621	0.0127928	-0.133458
C1orf226	1.83953	6.39362	3.66362	0.00469834	0.0389446	-2.24816
CAB39L	1.83093	11.2181	6.16104	0.000128894	0.00631547	1.42546
BCAS4	1.83032	7.44555	9.05364	5.35e-06	0.001236	4.60765
ITPR2	1.82832	7.85149	10.5345	1.42e-06	0.000620243	5.88483
RND3	1.82188	8.58358	6.35503	0.000101069	0.0057377	1.67281
OSBPL6	1.8202	11.0859	11.3083	7.54e-07	0.000466454	6.47755
CDCA8	1.81861	7.74086	6.49928	8.46e-05	0.00534122	1.85327
ZCCHC18	1.81502	8.9934	5.40883	0.00034709	0.0100437	0.414192
FNDC5	1.8107	9.56084	5.10258	0.000531383	0.0120923	-0.0217599
LOC100128239	1.80658	6.94834	4.54959	0.00118638	0.018402	-0.844245
EPHB1	1.80522	6.60121	3.9145	0.00314841	0.0312434	-1.8412
LOC253039	1.80347	6.50941	4.03209	0.00261699	0.0282575	-1.65278
PIGZ	1.80202	10.8727	7.2892	3.34e-05	0.0034766	2.79088
FBXO27	1.79694	8.10543	6.727	6.43e-05	0.00466595	2.13223
FAM60A	1.79307	10.7586	6.14684	0.000131233	0.00637619	1.40715
CENPW	1.78952	8.8645	6.80215	5.88e-05	0.00449537	2.22272
SEMA6A	1.78825	6.49892	5.76423	0.000215276	0.00809274	0.902447
INPP5J	1.78362	8.39234	5.1218	0.00051716	0.0119391	0.00602116
PRC1	1.78337	8.73356	4.95912	0.00065171	0.0134762	-0.230798
NR0B1	1.78112	11.3555	3.62523	0.00499847	0.0402329	-2.31096
TM7SF2	1.78097	9.9368	9.27018	4.36e-06	0.00113811	4.80725
MIOS	1.77926	7.25747	4.00471	0.00273165	0.0289945	-1.6965
SNCB	1.77876	9.75653	4.33502	0.00163947	0.0217153	-1.17518
FANCI	1.7786	6.23472	4.3991	0.00148749	0.0208336	-1.07569
C8orf47	1.77661	9.30738	6.97147	4.82e-05	0.00409946	2.4238
YPEL1	1.77559	10.2967	6.0173	0.000154834	0.00694505	1.23867
PHLDA1	1.77374	7.95337	5.70326	0.000233368	0.00840348	0.820031
KCNA4	1.77312	10.2044	5.17179	0.000482052	0.0116056	0.0780033
RNF157	1.77074	9.24286	5.68441	0.00023929	0.00846273	0.794431
RIMS4	1.76977	11.6352	7.10342	4.13e-05	0.0037749	2.57785
LOC100652987	1.76969	13.6597	6.90166	5.22e-05	0.00422821	2.34136
PAQR8	1.76941	8.24745	4.8312	0.000783773	0.0148015	-0.419782
PAK3	1.76724	10.1371	4.90876	0.00070062	0.0139429	-0.304915
MLF1IP	1.76097	6.94282	3.74111	0.00414841	0.0363034	-2.12178
KIAA0889	1.76041	7.03166	7.08764	4.21e-05	0.00380761	2.55955
TMEM132A	1.75868	13.1679	3.88707	0.00328798	0.0318792	-1.88536
TRAIP	1.75262	8.99205	5.26477	0.000423377	0.0110195	0.210874
TSC22D3	1.75099	8.98148	4.048	0.00255272	0.0278943	-1.62742
C2orf84	1.74802	7.62378	7.26432	3.44e-05	0.00351519	2.7626
MAOB	1.7464	10.4877	6.87777	5.37e-05	0.00428201	2.313
FLJ30064	1.74539	7.86375	5.23628	0.000440498	0.0112456	0.170293
SDC4	1.74196	9.17071	4.11428	0.00230227	0.0262608	-1.52205
IFI44	1.73439	10.7794	3.92868	0.00307869	0.0308936	-1.81839
CDC25A	1.73259	6.86766	7.53108	2.55e-05	0.00298415	3.06161
PLEKHA5	1.72796	9.07554	5.11085	0.000525214	0.0120339	-0.00980133
BUB1	1.72749	5.29636	3.97217	0.00287486	0.0297283	-1.74859
NAV1	1.72606	6.66345	5.86305	0.000189087	0.00760997	1.03486
DBP	1.72541	10.7165	5.43065	0.000336886	0.00988848	0.444718
NR6A1	1.72374	6.00738	7.74957	2.01e-05	0.00263819	3.2999
LOC100505679	1.7224	8.31085	8.30923	1.12e-05	0.00188589	3.88433
ARHGAP24	1.72149	7.07114	8.59799	8.35e-06	0.00157903	4.17195
FMN2	1.72034	7.97428	6.51388	8.31e-05	0.00533555	1.87137
PAPPA	1.71863	5.5561	6.20128	0.000122503	0.00615261	1.47722
KCNK3	1.71742	7.57953	5.23053	0.000444042	0.011263	0.162091
FAM82A1	1.71713	8.49057	11.3052	7.56e-07	0.000466454	6.47526
MPP2	1.71444	8.83932	6.37986	9.8e-05	0.00564767	1.70409
PLK2	1.71349	9.995	3.4935	0.00618979	0.0459363	-2.52741
CENPF	1.71333	7.47247	4.2315	0.00192084	0.0236155	-1.33707
IGF2BP2	1.71285	8.48766	6.45398	8.94e-05	0.00542863	1.79693
SLC24A2	1.71199	11.2327	4.39587	0.00149477	0.0208713	-1.08068
SPC25	1.70602	5.49914	3.66329	0.0047008	0.0389446	-2.24869
SPOCK1	1.70011	10.6853	5.18535	0.000472981	0.0115393	0.0974527
RND2	1.69951	8.29499	4.7767	0.00084849	0.0154307	-0.501036
HIGD1B	1.69917	8.3204	4.11609	0.00229583	0.0262351	-1.51919
CKMT1A	1.69396	10.2184	4.99037	0.000623213	0.0131799	-0.185007
SAA4	1.69305	5.69132	4.04619	0.00255992	0.0279055	-1.63029
LOC100127983	1.68794	7.11064	6.16403	0.000128406	0.00630797	1.42932
PSEN2	1.68747	8.05669	5.32254	0.000390818	0.0106411	0.292776
C20orf46	1.68518	9.62859	9.20497	4.64e-06	0.00113942	4.74763
SEC22C	1.67734	10.1443	5.6156	0.000262314	0.00886573	0.700559
ZNF275	1.67526	11.7266	8.22061	1.22e-05	0.00196014	3.79421
GRINA	1.67461	10.3171	7.47727	2.71e-05	0.00309025	3.00202
PLA2G4C	1.6691	11.0342	5.97815	0.000162842	0.00707458	1.18727
IGSF8	1.66657	9.32853	6.07649	0.000143526	0.00665134	1.31595
COLQ	1.6632	7.78001	3.82231	0.00364401	0.0338633	-1.98999
IDS	1.65813	8.44416	5.63195	0.000256636	0.0087793	0.722921
GOLGA6L9	1.65718	8.37622	8.22632	1.22e-05	0.00195696	3.80004
RABGGTA	1.65433	8.69979	7.13197	4e-05	0.00372547	2.61088
LOC100506409	1.65137	5.64534	4.65505	0.00101443	0.0168757	-0.683948
HSD17B14	1.65118	8.95576	6.14633	0.000131319	0.00637619	1.40648
LOC643201	1.65002	7.42841	3.83322	0.00358131	0.0335004	-1.97233
SYK	1.6484	9.5382	3.99518	0.0027728	0.029121	-1.71175
MRAP2	1.64607	6.7122	6.43088	9.2e-05	0.00545523	1.76807
CAMKV	1.64465	8.25809	5.28793	0.000409987	0.0108738	0.24377
ACER3	1.64375	6.80269	6.16424	0.000128372	0.00630797	1.42959
LOC100509683	1.64271	9.28281	6.77903	6.04e-05	0.00457248	2.19496
ZNF738	1.63998	5.83464	6.51943	8.26e-05	0.00533555	1.87825
HIATL1	1.63887	9.43002	7.29218	3.33e-05	0.00347455	2.79425
CLN6	1.63784	9.43218	9.9471	2.36e-06	0.000791403	5.40208
PITX1	1.63551	13.0736	3.93288	0.00305838	0.0307637	-1.81165
ZNF853	1.62958	7.50066	5.66643	0.000245086	0.00857917	0.769976
MEGF8	1.62856	8.74804	5.80968	0.000202773	0.00792351	0.963536
KIF11	1.62526	6.98334	5.53572	0.00029208	0.0093531	0.59068
RACGAP1	1.61977	7.34747	4.8295	0.00078571	0.0148128	-0.42231
CA11	1.61539	11.3386	5.69891	0.00023472	0.00841995	0.814128
PIGS	1.6116	8.24009	6.74323	6.3e-05	0.00462273	2.15184
UBE2E3	1.60783	10.3339	5.64531	0.000252091	0.00867905	0.741182
DCDC2	1.60602	5.80676	3.49306	0.00619422	0.0459363	-2.52814
PTPN20B	1.60267	7.18285	4.16927	0.00211422	0.025034	-1.43505
IQGAP2	1.60138	8.62644	3.85747	0.00344598	0.0328118	-1.93314
L3MBTL3	1.5992	6.41619	4.14204	0.00220523	0.0256515	-1.47809
GPR137B	1.59411	8.1047	3.67733	0.00459575	0.0384734	-2.22576
ACSM2A	1.59341	4.68707	6.52349	8.21e-05	0.00532049	1.88328
MT2A	1.59216	13.8167	4.66003	0.00100699	0.0168189	-0.676412
ANKRD55	1.5852	4.86562	5.6932	0.000236509	0.00844387	0.806373
GPD1	1.58476	7.34029	4.82358	0.000792501	0.0149035	-0.431124
PNMA2	1.58327	10.8629	5.31563	0.000394566	0.0106966	0.283008
LOC100129447	1.5812	7.05124	4.39668	0.00149295	0.0208673	-1.07943
CNIH3	1.57979	7.66955	6.44421	9.05e-05	0.00544144	1.78472
ELK1	1.57795	6.47824	4.84576	0.000767394	0.0146361	-0.398151
GSTCD	1.57439	8.33049	6.72617	6.43e-05	0.00466595	2.13123
HIST1H2BK	1.57143	11.2191	5.36481	0.0003687	0.0103001	0.352393
STX3	1.57142	9.26551	7.64537	2.25e-05	0.0028071	3.18699
IFI44L	1.56959	9.72023	3.79956	0.00377848	0.0345275	-2.02684
CERS6	1.56499	8.80123	6.33408	0.000103734	0.00580015	1.64636
UBE2T	1.56086	9.99827	4.02279	0.00265537	0.0284596	-1.66763
KIAA1524	1.55998	6.06627	6.04382	0.000149654	0.00683013	1.27336
TMSB15B	1.55815	8.77951	4.17116	0.00210806	0.0250005	-1.43208
RHOBTB3	1.55533	9.12941	5.65989	0.000247233	0.00860638	0.761065
ZNF75D	1.55119	7.05065	3.57046	0.00546179	0.0423767	-2.40079
SMARCD3	1.54823	14.187	3.9631	0.00291616	0.0299413	-1.76313
MAST2	1.54794	10.4849	5.127	0.000513388	0.0119047	0.013517
BEND6	1.54789	6.43388	4.40939	0.0014645	0.0206492	-1.05975
NUF2	1.54329	5.96525	4.94134	0.000668547	0.0136503	-0.256922
C2orf61	1.54292	5.77383	5.74564	0.000220627	0.00815814	0.877376
CSRP1	1.54108	9.11791	4.4053	0.0014736	0.020719	-1.06609
CYP27A1	1.53941	8.56216	6.52361	8.21e-05	0.00532049	1.88343
PGK1	1.53885	11.331	4.49149	0.00129413	0.019294	-0.933219
IGSF5	1.5379	6.5347	4.90773	0.000701658	0.0139429	-0.306431
TPST2	1.53756	10.2977	5.20064	0.000462965	0.0114612	0.119366
LOC441204	1.53738	6.98338	3.63593	0.00491283	0.039877	-2.29344
CADM3	1.53696	10.9114	4.59145	0.00111467	0.0178101	-0.780428
LOC286272	1.53637	7.28541	5.66859	0.000244383	0.00857049	0.772913
C3orf39	1.53543	9.65643	7.08063	4.24e-05	0.00382881	2.5514
ARAF	1.53377	9.08261	5.41255	0.000345327	0.010019	0.419404
MEIS3	1.52991	6.48471	4.16141	0.00214008	0.0252054	-1.44747
ARHGAP32	1.52961	9.85901	6.61174	7.38e-05	0.00505845	1.99193
GPSM2	1.52857	7.47122	3.50815	0.0060438	0.0453044	-2.50327
TPI1P2	1.52611	12.9337	8.63817	8.02e-06	0.00156437	4.21126
ADC	1.52611	7.80364	9.21992	4.57e-06	0.00113942	4.76134
KCNH3	1.52447	10.5702	4.34963	0.00160341	0.0215084	-1.15244
SLC6A1	1.52241	6.05944	4.44561	0.00138658	0.0200219	-1.00383
CRYGA	1.52168	6.53387	3.66422	0.00469381	0.0389392	-2.24718
DNASE1L1	1.52046	10.6204	4.57111	0.00114891	0.0180592	-0.811402
LOC729680	1.51713	9.20943	3.4269	0.00690124	0.0490636	-2.63735
FAM84B	1.51617	8.40587	3.82715	0.00361605	0.0337229	-1.98215
CLCN5	1.51253	6.65959	5.17723	0.00047839	0.0115826	0.0858107
RBM23	1.51109	6.23141	6.90189	5.22e-05	0.00422821	2.34163
IQSEC2	1.5102	9.697	5.0003	0.000614441	0.0130622	-0.170489
EFNB3	1.50966	10.1477	3.51724	0.00595501	0.0448031	-2.4883
C12orf75	1.50542	8.50816	4.75533	0.000875395	0.0156713	-0.533006
NLGN2	1.50195	10.2681	5.90644	0.000178691	0.00740682	1.09255
NUSAP1	1.49913	6.22252	5.7619	0.000215939	0.0081092	0.899306
SREBF2	1.49831	9.44269	8.16129	1.3e-05	0.00203954	3.73338
LOC100507475	1.49634	8.69882	5.50868	0.000302961	0.00946092	0.55328
SGK1	1.49586	11.3308	5.47048	0.000319087	0.00964391	0.500243
GPAA1	1.49506	9.09458	8.78987	6.91e-06	0.00142077	4.35809
SYTL2	1.49422	9.51589	3.45676	0.00657228	0.0475878	-2.58802
SYN1	1.49334	9.0801	4.84912	0.000763665	0.0145975	-0.393163
RAB11FIP5	1.48838	9.78749	8.71648	7.43e-06	0.00148632	4.28736
MGAT4B	1.48751	9.04852	6.31667	0.000106006	0.00583224	1.62434
MCU	1.48445	7.77964	7.71088	2.1e-05	0.00272242	3.25813
MKRN3	1.4838	7.10063	8.11144	1.37e-05	0.00207999	3.68194
TPI1	1.47968	14.2137	7.57136	2.44e-05	0.00290901	3.10598
SPEG	1.47884	14.0729	3.82601	0.00362263	0.0337508	-1.984
UBE2C	1.4752	6.43651	3.76621	0.00398515	0.0355243	-2.08098
SETDB2	1.47518	9.13221	4.43198	0.00141536	0.0203027	-1.02484
BSCL2	1.47438	12.6002	5.02571	0.000592579	0.0127928	-0.133384
CTTNBP2	1.47312	8.89121	3.68146	0.00456528	0.0383036	-2.21901
MCM2	1.47285	8.62298	4.77124	0.000855276	0.015488	-0.509194
NYNRIN	1.47259	7.89936	7.09236	4.19e-05	0.00380761	2.56503
ADAM15	1.47202	7.81608	3.82162	0.00364804	0.0338702	-1.99111
CDCA5	1.47075	7.43654	4.57358	0.0011447	0.0180382	-0.807643
PLXDC1	1.46965	6.36039	3.71488	0.00432665	0.0370701	-2.1645
STEAP3	1.46754	10.6285	6.69223	6.7e-05	0.00476745	2.0901
KIAA1715	1.46563	7.96411	5.67686	0.000241706	0.00850831	0.784169
FADS2	1.4605	13.7636	4.36132	0.00157519	0.0214116	-1.13428
SCD	1.45951	9.37872	3.98962	0.00279712	0.0293077	-1.72065
PIP4K2C	1.45856	8.7545	7.56171	2.47e-05	0.00292151	3.09537
ATOH8	1.45769	6.07927	3.83854	0.00355117	0.0334216	-1.96374
MRO	1.45734	6.76508	3.50881	0.0060373	0.0452647	-2.50219
ANKS6	1.45623	6.51015	9.6704	3.02e-06	0.000917349	5.16413
TSPAN1	1.45184	11.5905	3.59899	0.00521513	0.0412714	-2.35397
PLEKHH1	1.45148	8.4529	4.38514	0.00151927	0.0211038	-1.09731
ARHGEF11	1.44979	6.37882	7.383	3.01e-05	0.00328298	2.89674
DCLK2	1.44879	9.55454	7.63178	2.29e-05	0.00280788	3.17217
ADCY1	1.44877	8.99527	4.73521	0.000901571	0.0159444	-0.563179
PSAP	1.4404	11.991	4.94983	0.000660451	0.0135781	-0.244443
HIST1H2AD	1.43511	12.4427	4.35004	0.00160242	0.0215084	-1.15181
LGMN	1.43169	9.05844	6.45639	8.92e-05	0.00542137	1.79992
CALM1	1.4315	12.6718	6.63098	7.21e-05	0.00500099	2.01548
NMNAT3	1.42775	8.98482	5.01258	0.000603771	0.0129311	-0.152547
ZNF385A	1.42745	12.1332	5.88413	0.000183957	0.0075171	1.06292
LONRF1	1.42734	6.9855	4.13065	0.00224452	0.0259242	-1.49612
FANCD2	1.42461	7.41518	5.95846	0.000167036	0.00717532	1.16134
PSD2	1.42043	6.26972	4.80606	0.000812949	0.0151143	-0.457214
PDE7B	1.42034	7.09187	3.53272	0.00580701	0.0440827	-2.46284
LOC158435	1.41946	5.17984	4.97173	0.000640048	0.0133823	-0.212306
MIS18BP1	1.41832	7.03249	6.31617	0.000106072	0.00583224	1.6237
C4orf48	1.41831	15.0564	4.0915	0.00238528	0.0267775	-1.5582
AMIGO1	1.41762	7.08007	5.03059	0.000588475	0.012757	-0.126267
AES	1.41746	10.7153	6.05911	0.000146751	0.00673443	1.29332
JAKMIP2	1.41586	8.05963	4.70652	0.000940346	0.0162392	-0.6063
SRCIN1	1.41467	7.72722	6.30734	0.000107246	0.00583299	1.61251
OIP5	1.41228	6.25769	4.24642	0.00187732	0.0233179	-1.31365
LUZP1	1.41129	6.44731	7.10926	4.11e-05	0.00375879	2.58461
NXNL2	1.41041	7.72714	3.63933	0.00488596	0.0397907	-2.28788
TRIOBP	1.40898	9.31269	3.98543	0.00281557	0.0293869	-1.72735
FIG4	1.40863	9.38607	6.90454	5.21e-05	0.00422821	2.34477
CCNG1	1.40777	9.73488	5.40326	0.000349751	0.0100522	0.406379
AVL9	1.40642	8.43956	6.8745	5.39e-05	0.00428249	2.30911
C14orf1	1.40493	10.4859	5.72835	0.000225733	0.00826476	0.854009
UQCR10	1.40442	9.48455	7.06599	4.32e-05	0.00385606	2.53438
BST1	1.40249	6.30459	4.04886	0.00254929	0.0278842	-1.62604
AIFM2	1.40103	9.07143	4.6656	0.000998752	0.0167465	-0.668003
HTR1E	1.39937	4.71968	3.85014	0.0034863	0.0330952	-1.94498
PRDM10	1.39902	10.8653	6.90259	5.22e-05	0.00422821	2.34247
BTBD9	1.39697	11.2855	6.84854	5.56e-05	0.00434668	2.2782
C11orf92	1.39652	7.5819	4.26698	0.00181903	0.0229314	-1.28142
CSNK1E	1.39622	9.15586	6.34972	0.000101736	0.0057377	1.66613
CAMK2N1	1.39551	13.522	8.14722	1.32e-05	0.00204524	3.71889
ITIH5	1.39367	7.60286	5.22876	0.00044514	0.011263	0.159561
TMEM109	1.39324	8.41789	5.08615	0.000543871	0.012255	-0.0455466
NSDHL	1.39142	7.4176	4.30541	0.00171518	0.0222619	-1.22133
FAM64A	1.39072	6.43544	3.79751	0.00379088	0.0346256	-2.03017
SHC2	1.39037	12.661	4.58374	0.00112751	0.0179354	-0.792154
WDR25	1.38746	6.56356	3.71815	0.00430401	0.0369434	-2.15918
LOC730091	1.38575	10.3709	5.30079	0.000402749	0.0107791	0.262
MECP2	1.38553	10.4175	8.74347	7.23e-06	0.00146293	4.31344
SLC22A17	1.38416	13.3358	5.52033	0.000298221	0.00944028	0.569403
AMMECR1	1.38265	8.21171	5.13775	0.000505674	0.0118772	0.0290195
BHLHE41	1.38227	12.0376	3.92362	0.00310337	0.0310381	-1.82652
LINC00277	1.37858	5.5718	3.57904	0.00538641	0.0420264	-2.38671
ACSL4	1.37804	8.53106	3.95441	0.00295634	0.0301645	-1.77707
BEND5	1.37744	10.9494	4.11687	0.00229303	0.026219	-1.51795
MANEA	1.3753	8.6839	5.87936	0.000185103	0.00753018	1.05659
GLCE	1.37417	9.00841	3.67736	0.00459555	0.0384734	-2.22571
TLN1	1.37398	8.21049	6.55855	7.87e-05	0.00525183	1.92657
DNTT	1.37308	4.82906	4.68342	0.000972846	0.0165662	-0.641093
C5orf25	1.3709	11.2522	7.85668	1.79e-05	0.0024722	3.4146
PLLP	1.36982	6.33285	3.44783	0.00666897	0.0480569	-2.60277
EZH2	1.36895	7.71154	5.42227	0.000340769	0.00994042	0.432995
LAMP2	1.36844	10.8491	5.18483	0.000473322	0.0115393	0.0967164
PCSK1N	1.36834	16.2376	4.22153	0.00195052	0.0238305	-1.35273
SHKBP1	1.36537	7.96272	5.55664	0.000283947	0.00925902	0.619555
DPY19L2	1.36509	6.37471	7.32497	3.21e-05	0.00339448	2.83138
FCGR2A	1.36494	8.49959	3.89283	0.00325817	0.031706	-1.87609
NLRP3	1.36324	7.14032	3.58191	0.0053614	0.0419276	-2.382
ACOT2	1.36077	8.6323	5.81249	0.000202027	0.00791192	0.967296
C18orf10	1.35874	10.0886	7.21586	3.63e-05	0.00357071	2.70732
HCN3	1.35794	9.40309	7.60236	2.36e-05	0.00284947	3.13999
CSPG5	1.35687	6.42942	4.45474	0.00136763	0.0198473	-0.989745
SLC41A1	1.35392	10.8197	5.54416	0.000288767	0.00932731	0.602342
MAGED2	1.35288	13.1457	7.21084	3.66e-05	0.00358184	2.70157
STXBP5L	1.35219	9.91151	4.41313	0.00145626	0.0205856	-1.05398
FRAT2	1.35192	10.0589	4.72049	0.000921237	0.0160938	-0.585276
ERO1L	1.34957	7.7069	3.75437	0.00406133	0.0359088	-2.10022
USP46	1.34893	7.68362	4.97877	0.000633637	0.0133131	-0.201994
USP35	1.34893	13.0601	9.19232	4.69e-06	0.00113942	4.73602
LOC100507520	1.34846	7.35983	4.31367	0.00169371	0.0220928	-1.20845
SLC8A2	1.34794	10.6502	3.98837	0.00280258	0.0293274	-1.72264
RBM45	1.34765	6.11825	4.96118	0.000649793	0.0134675	-0.227782
TUBA1C	1.34678	11.918	8.13384	1.34e-05	0.00204858	3.70509
CNRIP1	1.34667	10.7977	3.98512	0.00281693	0.0293876	-1.72785
SKA3	1.34628	5.62628	4.215	0.00197022	0.0239834	-1.363
ACO2	1.34126	13.0685	7.05315	4.38e-05	0.00388696	2.51943
SVOP	1.34026	12.5203	5.5146	0.000300544	0.00944028	0.561471
GSDMB	1.33738	8.70371	4.553	0.00118035	0.0183464	-0.839034
SLC16A14	1.33442	7.86029	4.10092	0.00235059	0.0265623	-1.54325
RAB6B	1.33409	9.81578	4.65206	0.00101891	0.0169204	-0.688465
PPP1R3F	1.33203	11.2664	4.35904	0.00158065	0.0214126	-1.13782
C15orf29	1.33129	7.31571	6.41457	9.39e-05	0.00551184	1.74766
ZBTB22	1.3311	7.44556	10.2211	1.85e-06	0.000732095	5.63099
OAS3	1.32987	8.55752	4.35679	0.00158606	0.0214126	-1.14131
SNURF	1.32866	9.44331	7.19931	3.7e-05	0.00359186	2.68836
KIF1A	1.32729	7.95517	5.8045	0.000204158	0.00795285	0.956588
IPCEF1	1.3263	5.03669	6.60905	7.4e-05	0.00506324	1.98865
C22orf15	1.32447	7.6749	3.48165	0.00631063	0.0463354	-2.54696
SEMA6D	1.32417	6.21368	3.60401	0.0051729	0.0410667	-2.34573
SLC37A2	1.32306	7.91689	3.50021	0.00612246	0.0456395	-2.51635
PCCB	1.32241	8.00445	5.29261	0.000407336	0.0108633	0.250408
LOC100287616	1.32017	5.43025	3.91558	0.00314304	0.0312425	-1.83946
MAPRE3	1.31913	9.00989	7.24813	3.5e-05	0.00351519	2.74416
PHLDB1	1.31896	8.08204	5.39853	0.00035202	0.0100581	0.399762
SSBP2	1.31886	9.13343	5.72518	0.000226681	0.00826476	0.849729
COX7B	1.3186	10.2347	5.54702	0.000287656	0.00931971	0.606284
SCN9A	1.31855	8.11658	3.73056	0.00421915	0.0366582	-2.13895
HMMR	1.31847	6.26377	3.64637	0.00483084	0.0395527	-2.27637
FAM132A	1.31513	6.72423	4.64406	0.00103103	0.0170389	-0.70057
AP1AR	1.31352	7.66481	6.80269	5.87e-05	0.00449537	2.22336
COBLL1	1.31169	7.05391	5.3103	0.000397481	0.0107297	0.275476
TRAFD1	1.31029	7.27085	7.65232	2.24e-05	0.00280006	3.19456
FLOT2	1.30997	10.8967	6.72002	6.48e-05	0.00467075	2.12378
TTF2	1.30994	4.8759	4.80333	0.000816178	0.0151444	-0.461274
MYO1H	1.30697	4.28206	4.36575	0.00156463	0.0213788	-1.1274
ARF3	1.3063	8.97981	5.0962	0.00053619	0.0121305	-0.030981
FAM83D	1.305	4.89086	3.89257	0.00325951	0.031706	-1.87651
SPATA13	1.30389	9.65691	3.75005	0.00408946	0.0360474	-2.10723
BRMS1L	1.30217	8.48356	4.39903	0.00148764	0.0208336	-1.07579
KLHL23	1.30188	8.39597	3.80074	0.00377138	0.0345202	-2.02493
FOLR2	1.30101	8.15531	3.70495	0.00439611	0.0374097	-2.18068
FBXL14	1.29921	9.1032	9.82278	2.63e-06	0.00084052	5.29603
ATP5B	1.29896	13.8762	5.90879	0.000178147	0.00740682	1.09566
PLXNA1	1.29839	10.9847	6.86591	5.45e-05	0.0043015	2.29889
CHUK	1.29708	7.10364	5.40943	0.000346805	0.0100437	0.415034
C5orf35	1.29615	7.42626	3.49675	0.00615707	0.0457615	-2.52205
SPG20OS	1.29606	6.58058	5.45781	0.000324637	0.00973068	0.482605
DHRS11	1.29424	9.28144	5.4318	0.000336358	0.00988175	0.446323
WBP2	1.2942	7.78142	5.99345	0.00015966	0.00704286	1.20739
TMC4	1.29413	12.7203	4.79336	0.000828122	0.0152668	-0.476152
CTSD	1.29365	9.96734	4.62684	0.00105764	0.0173101	-0.726663
GSTM2	1.29287	10.8422	3.46278	0.00650802	0.0473254	-2.57809
CXorf69	1.29205	9.04914	5.07578	0.000551908	0.0122962	-0.0605695
KCNC4	1.29186	7.74022	4.83656	0.0007777	0.0147405	-0.411816
TBCD	1.29154	6.94998	6.25281	0.000114816	0.00592956	1.54315
RRAGB	1.29146	8.3863	3.66967	0.00465275	0.0387679	-2.23826
FAM122C	1.29095	6.80737	3.57841	0.00539191	0.0420378	-2.38775
TMEM128	1.28737	9.73016	5.38041	0.000360881	0.0101952	0.374328
AKNA	1.28682	6.12063	4.36222	0.00157303	0.021408	-1.13287
HLA-A	1.28668	12.4938	3.54406	0.0057009	0.0435511	-2.44417
CYBASC3	1.285	8.71989	5.09733	0.000535334	0.0121207	-0.0293456
KIAA0040	1.285	6.41875	5.81365	0.000201719	0.00791192	0.968854
PLD1	1.28471	5.31563	5.20419	0.000460674	0.0114424	0.124445
TMIE	1.28225	10.9522	3.74463	0.00412514	0.0362455	-2.11606
DCK	1.28082	7.02685	6.19626	0.000123281	0.00615261	1.47078
SLC20A1	1.2793	6.81417	4.64177	0.00103453	0.0170742	-0.704037
AKT1	1.27778	6.85089	6.35503	0.000101068	0.0057377	1.67282
CHST5	1.27745	7.53644	6.28077	0.000110866	0.0058815	1.57876
SRF	1.27742	6.74548	5.10459	0.000529872	0.0120843	-0.0188445
CNNM1	1.27627	7.09001	3.92693	0.00308723	0.0309216	-1.82121
C20orf203	1.27527	5.44171	8.86616	6.41e-06	0.00136694	4.431
INHA	1.27436	7.45397	5.09961	0.000533615	0.0121036	-0.0260517
PARP11	1.27235	6.33591	3.54957	0.00565017	0.0433203	-2.43512
OTUB1	1.27209	9.23412	7.8701	1.77e-05	0.00246414	3.42887
ZNF681	1.2715	5.95175	6.40245	9.53e-05	0.00554304	1.73246
CYP2A6	1.27081	5.20902	3.93797	0.00303389	0.0306237	-1.80345
C17orf101	1.27029	9.84254	5.4563	0.000325304	0.00973068	0.480505
ADAM22	1.26923	7.86627	8.10759	1.38e-05	0.00207999	3.67796
CLIP3	1.26717	12.7108	6.06528	0.000145597	0.00668965	1.30136
NANOS3	1.26548	9.69739	3.42294	0.00694615	0.0492712	-2.64389
PACS1	1.26441	8.35542	5.25473	0.000429327	0.0110806	0.19659
UBA7	1.26358	8.7929	3.89264	0.00325911	0.031706	-1.87639
CDK16	1.26311	9.72974	3.71869	0.00430025	0.0369328	-2.15829
CHST11	1.26282	8.44944	4.48825	0.00130044	0.0193192	-0.938193
NR1H2	1.2618	8.37178	7.78301	1.94e-05	0.0025627	3.33585
KIF15	1.2613	6.36023	5.25879	0.00042691	0.011075	0.202369
MED12	1.2606	8.18114	5.72204	0.000227628	0.00828294	0.84547
CIB4	1.26059	5.64856	3.49047	0.00622043	0.0459692	-2.53241
C20orf27	1.25888	8.06857	3.41563	0.00702972	0.0496001	-2.65597
RTN4	1.25823	12.9158	5.00584	0.000609599	0.0129852	-0.162385
NPM2	1.25759	9.9591	4.59657	0.00110623	0.0177288	-0.772642
ACSL6	1.25543	9.03524	3.55109	0.00563617	0.0432835	-2.43261
TTC23	1.25515	8.95227	6.79823	5.9e-05	0.00449537	2.21802
MOSPD1	1.25347	7.64656	3.9651	0.00290699	0.0298961	-1.75992
CCND2	1.25219	12.0474	4.40473	0.00147486	0.0207241	-1.06697
UBE2N	1.25158	9.37829	6.74338	6.3e-05	0.00462273	2.15202
C5orf13	1.24929	12.1099	6.36392	0.0001	0.00571656	1.68402
SIGLEC10	1.24914	5.85431	3.57134	0.00545398	0.0423249	-2.39934
PPME1	1.24821	8.19422	5.89292	0.000181863	0.00745766	1.0746
SIAE	1.24437	7.19621	3.79504	0.00380583	0.0347067	-2.03418
KLHL18	1.24246	9.78762	5.44541	0.000330168	0.00979255	0.465325
ATP2A2	1.24146	10.7927	5.86358	0.000188954	0.00760997	1.03557
DDIT3	1.24041	10.2345	4.90274	0.000706724	0.0139895	-0.313799
HSPA8	1.23875	11.6235	4.47308	0.00133042	0.019518	-0.961518
LOC202181	1.2352	9.77677	7.56547	2.46e-05	0.00291865	3.09951
CPLX2	1.23438	9.79628	3.59344	0.00526219	0.0414526	-2.36307
CENPA	1.23353	4.38317	3.78333	0.00387763	0.0350674	-2.05318
LOC100505564	1.23307	6.16182	3.63788	0.00489746	0.0398295	-2.29026
ERLIN1	1.23245	11.3331	6.27354	0.000111872	0.0058815	1.56957
POLR2E	1.23206	9.14602	6.54598	7.99e-05	0.00527189	1.91106
UBE2S	1.23134	11.3387	8.34875	1.07e-05	0.00186999	3.92425
SCAI	1.22924	7.07521	4.21512	0.00196984	0.0239834	-1.3628
PTPRN	1.22765	10.7874	3.4886	0.00623952	0.0460649	-2.5355
CCNE1	1.227	9.29908	8.1607	1.3e-05	0.00203954	3.73277
EPB49	1.22497	8.22662	6.7732	6.08e-05	0.00457666	2.18795
SHANK1	1.2244	6.70952	5.08211	0.000546984	0.0122735	-0.0513907
DCAF7	1.2235	11.59	6.09138	0.000140824	0.00661195	1.33532
TRIM74	1.22312	8.27737	7.81475	1.88e-05	0.00250315	3.36987
GRIA4	1.222	7.43806	6.86531	5.45e-05	0.0043015	2.29818
ARHGEF4	1.22082	7.19148	5.76931	0.000213838	0.00808171	0.909292
C6orf64	1.21753	8.81981	4.79674	0.000824055	0.0152373	-0.471111
SLC35A5	1.21741	9.48824	9.8442	2.58e-06	0.00084052	5.31441
SIX6	1.21691	11.9383	5.15913	0.0004907	0.0117164	0.0597978
MACROD2	1.21614	8.8858	3.63098	0.00495227	0.040071	-2.30155
PTPN13	1.21561	11.944	5.75967	0.000216576	0.0081092	0.8963
TBC1D2B	1.21386	5.6971	5.71943	0.000228416	0.00829478	0.841938
OR7E91P	1.21279	7.09462	5.05487	0.000568522	0.01251	-0.0909411
AR	1.21172	11.085	3.98312	0.00282579	0.0294415	-1.73105
TMEM97	1.21126	7.70308	5.18473	0.000473394	0.0115393	0.0965608
WHSC1	1.21067	9.81677	5.27299	0.000418571	0.0109631	0.222559
OCRL	1.21051	6.01166	4.65101	0.0010205	0.0169318	-0.690056
ATP6V0E2	1.20953	10.3949	5.96207	0.000166258	0.0071699	1.1661
EXD3	1.20856	8.81996	4.84102	0.000772685	0.0147221	-0.405189
DSN1	1.20819	9.29709	3.75134	0.00408106	0.0359936	-2.10514
ANKRD6	1.20813	8.37085	4.08147	0.00242283	0.0269596	-1.57414
EPHA5	1.20612	5.69897	3.51924	0.00593573	0.044708	-2.48502
HIST1H2BJ	1.20409	4.36674	4.11322	0.00230608	0.0262883	-1.52374
PSME3	1.20279	9.99558	6.75873	6.19e-05	0.00459374	2.17052
ORMDL3	1.2016	7.60226	4.06193	0.00249778	0.027459	-1.60522
RAB1B	1.20097	7.13826	4.50316	0.00127168	0.0190591	-0.915306
AIM1L	1.20013	5.6094	3.46242	0.00651181	0.0473254	-2.57868
CBX3P2	1.19996	5.51436	4.62221	0.00106492	0.0173478	-0.733685
STK35	1.19956	7.83304	3.57817	0.00539396	0.0420411	-2.38813
GNB5	1.19952	9.97334	5.80763	0.00020332	0.00793562	0.960784
UHRF2	1.19811	7.49411	4.77238	0.000853858	0.0154742	-0.507495
CYP4F12	1.19661	5.55886	5.02597	0.000592359	0.0127928	-0.133004
TCF19	1.19634	4.91585	4.46336	0.00135001	0.0197055	-0.976474
TMEM231	1.19608	5.76163	6.84307	5.6e-05	0.0043523	2.27167
CYC1	1.19578	12.0267	6.90311	5.22e-05	0.00422821	2.34308
KNTC1	1.19478	7.73372	3.84241	0.00352939	0.0333295	-1.95748
MPL	1.19385	6.6354	4.0837	0.00241445	0.0269188	-1.5706
HIF1AN	1.19367	7.44029	6.9452	4.97e-05	0.00413359	2.39285
KCTD13	1.19279	6.77973	6.7211	6.47e-05	0.00467075	2.12509
FAM122B	1.19247	6.47298	5.93241	0.000172766	0.00730469	1.12695
CISD2	1.19196	6.95448	5.01034	0.0006057	0.0129454	-0.155813
RAD51AP1	1.19107	4.97182	4.60738	0.0010886	0.0175289	-0.756198
BCLAF1	1.1888	6.85625	6.73838	6.34e-05	0.00464053	2.14598
RGS18	1.18702	7.65774	4.35663	0.00158646	0.0214126	-1.14157
NDFIP2	1.18613	8.52597	6.75272	6.23e-05	0.00461174	2.16328
EPB41L5	1.18591	9.35706	5.21022	0.000456805	0.011399	0.133081
U2AF1L4	1.18518	10.0728	6.53068	8.14e-05	0.00532049	1.89217
LOC728743	1.18458	8.13869	5.39076	0.000355792	0.0101198	0.388857
BTD	1.18321	7.83017	4.62004	0.00106836	0.0173511	-0.736987
CHID1	1.18063	10.6321	3.42455	0.00692778	0.0492151	-2.64122
ABCA3	1.1806	10.9758	6.89713	5.25e-05	0.00424162	2.33599
CLDN9	1.17793	9.24683	5.35803	0.000372156	0.0103505	0.342848
ATP5G3	1.17636	7.30158	6.55067	7.95e-05	0.00526502	1.91686
CALM3	1.17329	11.7367	9.03206	5.47e-06	0.00124649	4.5875
GRIK5	1.17299	7.94684	6.02017	0.000154264	0.00693816	1.24243
ZIM2	1.17007	8.87716	6.17739	0.000126255	0.0062513	1.44651
SPRN	1.16964	8.49191	3.9423	0.00301327	0.0305079	-1.79651
KIF1B	1.16808	12.4452	3.74582	0.00411726	0.0361991	-2.11412
RNF5	1.16773	10.4356	5.59423	0.000269944	0.00902796	0.671253
PIGH	1.16707	9.75256	7.08753	4.21e-05	0.00380761	2.55942
SLC29A2	1.16707	7.8633	5.84178	0.000194416	0.00776634	1.00649
ACTR1B	1.16582	10.8037	5.61633	0.000262059	0.00886573	0.701553
PRELID2	1.16575	8.15188	6.41555	9.38e-05	0.00551184	1.74889
TSR2	1.16476	10.4189	3.57226	0.00544591	0.0423207	-2.39784
KIAA0922	1.1636	5.83379	5.07355	0.000553653	0.0123205	-0.0638014
C12orf32	1.16297	8.17912	6.63504	7.18e-05	0.0050001	2.02044
CNOT8	1.16295	8.8477	5.0425	0.000578594	0.0126658	-0.108925
ABLIM3	1.16267	9.36897	3.46972	0.00643461	0.0470255	-2.56663
TCOF1	1.15918	11.6557	6.99934	4.66e-05	0.00403249	2.45653
H2BFXP	1.15889	7.05313	5.78441	0.000209626	0.00804098	0.929605
ZNF665	1.15863	6.18913	5.24799	0.00043337	0.0111335	0.186994
TCP1	1.15706	8.05321	5.30207	0.000402036	0.0107791	0.263813
ZNF238	1.15688	6.77467	4.47433	0.00132793	0.0194966	-0.959598
ANKDD1A	1.15578	6.0398	3.84167	0.0035335	0.0333331	-1.95866
SLC27A4	1.15509	7.54467	5.37684	0.000362652	0.0102205	0.369318
KHDC1	1.15313	9.40476	3.894	0.00325215	0.0316884	-1.87421
SCMH1	1.15232	9.3736	9.29375	4.27e-06	0.00113811	4.8287
DBF4B	1.14917	7.94143	5.54205	0.000289591	0.00933672	0.599429
NR1D2	1.14816	10.6367	4.41749	0.00144667	0.0204886	-1.04722
TOR3A	1.14812	8.20395	5.31358	0.000395685	0.0106966	0.28011
PSMC3IP	1.14797	8.17606	7.48472	2.69e-05	0.00307415	3.01029
BAP1	1.14711	8.11481	4.07346	0.00245327	0.027144	-1.58688
SBF1	1.14698	10.0009	6.59282	7.55e-05	0.00510121	1.96874
LRRC28	1.14676	7.43262	5.03112	0.000588033	0.012757	-0.125498
RPL10	1.14623	6.29472	4.28741	0.00176303	0.0225579	-1.24946
MESP1	1.14558	11.2423	5.06693	0.000558874	0.0123613	-0.0734133
LOC650293	1.14291	6.39964	3.61943	0.00504558	0.0404485	-2.32047
GPR27	1.14251	11.0596	3.60851	0.0051354	0.0408552	-2.33836
GNPDA1	1.14134	8.67023	4.53635	0.00121006	0.0185088	-0.864478
ARHGAP1	1.14129	6.84809	3.56693	0.00549315	0.0425236	-2.40659
C8orf42	1.13984	6.88367	5.75311	0.00021846	0.00813398	0.887456
DEF6	1.13895	8.62379	4.63106	0.00105106	0.0172252	-0.720269
BRPF3	1.13886	7.55567	6.2778	0.000111277	0.0058815	1.57499
MRPL10	1.13841	10.0632	6.11873	0.000136003	0.0064782	1.3708
KATNB1	1.1372	8.28582	7.32275	3.22e-05	0.00339448	2.82887
BCKDK	1.13715	8.66828	6.2067	0.00012167	0.00613221	1.48417
NRG2	1.13706	9.05587	5.1162	0.000521262	0.011997	-0.00206823
SENP3	1.13648	10.1953	4.92986	0.000679666	0.013739	-0.273816
SHCBP1	1.13559	5.22532	3.42467	0.0069265	0.0492151	-2.64103
SRGAP2P1	1.13539	8.46393	7.1524	3.91e-05	0.00367571	2.63444
SUSD1	1.13478	10.013	6.38739	9.71e-05	0.0056125	1.71355
ATG13	1.1344	10.2612	6.27559	0.000111585	0.0058815	1.57218
ATN1	1.13418	10.8885	6.90571	5.2e-05	0.00422821	2.34616
FANCM	1.13411	6.14217	4.17533	0.00209453	0.0249007	-1.4255
TMEM180	1.13386	9.34676	4.76697	0.000860629	0.0155151	-0.515584
CAMK2G	1.13293	8.37131	4.9713	0.000640446	0.0133823	-0.212941
COG8	1.13208	7.64254	7.58219	2.41e-05	0.00288375	3.11788
GTSE1	1.13154	5.91757	4.33078	0.00165008	0.0217946	-1.18177
UNG	1.13085	6.15411	8.32408	1.1e-05	0.00188398	3.89935
C3orf70	1.12978	6.10977	4.1209	0.00227872	0.0261422	-1.51156
CD276	1.12823	7.51165	5.78839	0.000208529	0.0080396	0.934961
DOCK5	1.12756	6.01263	3.68343	0.0045509	0.0381999	-2.2158
PRR3	1.12751	7.78146	5.9283	0.00017369	0.00731746	1.12151
PBX3	1.12696	10.2504	5.01668	0.000600251	0.0128799	-0.146559
PIN4	1.12566	7.92281	3.58174	0.00536289	0.0419293	-2.38228
WDR82	1.12498	6.65244	3.744	0.00412927	0.0362455	-2.11708
PSMD10	1.12489	10.5603	3.87953	0.00332747	0.032092	-1.89752
DYRK3	1.12459	9.64603	3.72308	0.00427005	0.036867	-2.15113
XRCC2	1.124	5.78176	4.74829	0.000884455	0.0157776	-0.543551
KAT7	1.12197	8.9077	5.30845	0.000398503	0.0107472	0.272847
CXorf57	1.12163	12.1655	5.16078	0.000489561	0.0117065	0.0621769
TMEM223	1.12125	5.68002	5.09767	0.000535079	0.0121207	-0.0288583
MEGF9	1.1193	9.8006	3.55313	0.0056176	0.043227	-2.42927
SDHB	1.11853	11.8077	6.15355	0.000130121	0.00634257	1.41581
MCF2L2	1.11821	5.22481	3.79248	0.00382139	0.0347913	-2.03832
DOPEY1	1.11681	9.95525	7.58491	2.41e-05	0.00288375	3.12087
PNO1	1.11363	8.30151	3.48721	0.0062536	0.046104	-2.53778
C9orf91	1.11355	9.52915	6.76179	6.16e-05	0.00459374	2.17421
SLC26A10	1.11352	8.96022	3.59059	0.00528655	0.0415656	-2.36775
CENPH	1.11086	6.8953	3.56144	0.00554231	0.0428425	-2.41561
CES2	1.11046	7.98912	5.10307	0.00053101	0.0120923	-0.0210417
EXOSC5	1.11022	7.4659	3.98426	0.00282075	0.0294111	-1.72923
HEATR4	1.1092	6.03088	3.51395	0.00598702	0.0449864	-2.49373
POC1A	1.10887	7.1398	5.74228	0.000221609	0.00816762	0.87284
IPO13	1.10862	9.29085	4.75259	0.000878912	0.0156953	-0.537112
SLC39A3	1.10557	8.22485	5.39655	0.000352981	0.0100738	0.396973
M6PR	1.10513	9.33031	7.25707	3.47e-05	0.00351519	2.75435
C4orf21	1.10462	7.03995	8.27671	1.16e-05	0.00191542	3.85136
ARHGEF12	1.10408	7.61272	6.67166	6.87e-05	0.00487472	2.0651
CDIPT	1.10402	10.0397	4.9396	0.000670221	0.0136548	-0.259484
PEX19	1.10347	11.5629	6.27119	0.000112202	0.0058815	1.56657
OTUB2	1.10294	4.84945	6.18562	0.000124949	0.00621112	1.4571
C8orf33	1.10258	8.01102	4.09665	0.00236625	0.0266686	-1.55002
YEATS4	1.1023	9.83974	6.58902	7.59e-05	0.00511556	1.96407
SPTB	1.10212	7.66265	5.17412	0.000480484	0.0115827	0.0813391
VAT1	1.10038	7.92896	5.81024	0.000202625	0.00792351	0.964278
PEA15	1.10001	10.2397	4.66711	0.000996529	0.0167465	-0.665721
TMEM18	1.09956	7.45355	4.63525	0.00104456	0.0171646	-0.713923
AKAP6	1.09816	8.60872	4.31986	0.00167778	0.021999	-1.19879
UNC119	1.09707	9.22302	4.68703	0.000967697	0.016507	-0.635659
C9orf174	1.09706	9.60609	3.49372	0.00618758	0.0459339	-2.52705
ZNF880	1.09692	7.16719	3.53489	0.00578655	0.0439806	-2.45926
MAPK8IP2	1.09661	11.3059	6.88388	5.34e-05	0.00427153	2.32026
TRIM9	1.09537	6.89983	4.03184	0.00261803	0.0282606	-1.65318
KIAA0247	1.0934	12.0394	5.40376	0.000349507	0.0100522	0.407093
SCG3	1.09329	10.4326	3.91789	0.0031316	0.0311834	-1.83574
CABLES2	1.09313	8.47988	6.34023	0.000102943	0.0057731	1.65414
BTRC	1.09228	10.6604	5.68749	0.000238311	0.00845205	0.79862
HADH	1.09136	8.22269	5.19015	0.000469812	0.0115186	0.104336
GNRHR2	1.09108	7.27805	3.70033	0.00442886	0.0375774	-2.18821
SIGMAR1	1.08956	11.3072	4.65652	0.00101223	0.0168533	-0.681723
KREMEN1	1.08883	10.7722	3.8359	0.0035661	0.0334482	-1.968
PKM2	1.08879	12.2601	6.09952	0.00013937	0.00658757	1.34589
TMEM115	1.08694	7.65536	4.85001	0.000762677	0.0145975	-0.391837
RRAGD	1.08656	10.3479	4.44248	0.00139314	0.0201011	-1.00865
MLLT6	1.08525	11.9498	7.24399	3.52e-05	0.00351519	2.73945
GTPBP6	1.08522	7.71451	6.12878	0.000134278	0.00643677	1.3838
PRMT1	1.08517	12.1632	7.6283	2.3e-05	0.00280788	3.16836
HEATR8	1.08488	12.1497	3.58212	0.00535953	0.0419276	-2.38164
ALAD	1.0841	7.56053	5.21022	0.000456806	0.011399	0.133077
EXOC7	1.08386	10.1989	6.34027	0.000102938	0.0057731	1.65419
PRR13	1.08351	9.66825	4.61017	0.0010841	0.0175075	-0.751961
ARHGAP33	1.08331	9.23402	4.83633	0.000777962	0.0147405	-0.41216
MOAP1	1.08296	10.8463	4.08952	0.00239267	0.0267976	-1.56136
ASB1	1.08267	8.89685	4.12053	0.00228006	0.0261422	-1.51215
ZNF177	1.08113	9.67529	7.60184	2.36e-05	0.00284947	3.13942
KALRN	1.08079	7.42525	6.65451	7.01e-05	0.00493905	2.04421
TPX2	1.07942	6.45691	4.37492	0.00154299	0.0212529	-1.11316
NCOA3	1.07879	8.17116	4.89272	0.000717009	0.0141336	-0.328597
RABL3	1.07837	8.02986	4.6674	0.000996098	0.0167465	-0.665278
GBA2	1.07711	9.24271	6.06832	0.000145033	0.00667188	1.30531
HPS1	1.07701	8.86983	4.45421	0.00136873	0.0198555	-0.990565
KAT6B	1.07664	8.92911	4.8208	0.000795707	0.0149563	-0.435259
PRMT3	1.07657	8.2251	4.61524	0.00107599	0.0174373	-0.744266
CD99L2	1.07601	13.2972	4.66681	0.000996964	0.0167465	-0.666169
WDR47	1.07589	8.14488	3.99992	0.00275225	0.0290512	-1.70417
LPIN2	1.0753	7.53284	3.74924	0.00409477	0.0360607	-2.10855
UBA1	1.07475	10.835	3.70378	0.00440438	0.0374631	-2.18258
SAV1	1.07456	8.22702	5.94707	0.000169517	0.00721597	1.14631
C1orf135	1.0741	5.53636	4.3898	0.00150858	0.020994	-1.09009
ZDHHC12	1.07401	7.91598	4.14003	0.00221212	0.025692	-1.48127
TGOLN2	1.07395	12.4537	5.16723	0.00048515	0.0116653	0.0714455
LRRC41	1.07322	8.56064	6.12372	0.000135142	0.00644539	1.37726
GRK6	1.0731	9.60281	6.77643	6.06e-05	0.00457666	2.19184
CUL3	1.07201	7.59529	5.29048	0.000408539	0.0108722	0.24739
ROR1	1.07166	8.11052	3.50405	0.00608432	0.0454633	-2.51003
RUVBL1	1.07137	7.76726	6.49326	8.52e-05	0.00534122	1.8458
PDPK1	1.07093	9.07881	3.91692	0.00313638	0.0312062	-1.8373
THAP10	1.07062	8.22064	6.40523	9.5e-05	0.00553258	1.73595
C3orf58	1.06868	7.1561	3.65282	0.0047808	0.03934	-2.26581
PPM1F	1.06733	6.97942	4.36126	0.00157534	0.0214116	-1.13437
SPTBN2	1.06627	8.49235	4.62043	0.00106774	0.0173511	-0.736393
PGBD5	1.06573	8.61598	3.48444	0.0062819	0.0462237	-2.54235
SMPD4	1.06558	8.94227	4.58063	0.00113275	0.0179617	-0.796898
WWP2	1.06452	6.94844	5.22525	0.000447323	0.0112745	0.154553
AKT3	1.06428	11.9682	4.8024	0.000817285	0.0151574	-0.462661
TRNT1	1.06417	8.60659	4.17715	0.00208863	0.0248798	-1.42262
DSCR3	1.06414	9.66351	5.48178	0.000314224	0.00959434	0.515949
STOML1	1.06284	7.8224	3.68867	0.0045127	0.038032	-2.20725
CEP135	1.06187	6.0398	6.97581	4.79e-05	0.00409731	2.42891
NFATC3	1.06171	8.44126	5.11903	0.000519183	0.0119711	0.00202501
PACRGL	1.06165	6.20384	4.28275	0.00177564	0.0226396	-1.25674
MLST8	1.06083	8.36487	6.64459	7.09e-05	0.0049752	2.03211
HDAC3	1.06063	8.53579	6.8768	5.38e-05	0.00428201	2.31185
SNX17	1.06052	8.62719	4.26048	0.00183725	0.0230835	-1.2916
TBL3	1.06047	6.96141	5.13735	0.000505959	0.0118772	0.0284437
AKR1B1	1.05898	12.4594	3.55782	0.00557498	0.0429847	-2.42156
STRADB	1.05844	10.5902	4.62451	0.00106131	0.0173101	-0.730209
ORMDL1	1.05593	9.50272	4.34946	0.00160384	0.0215084	-1.15271
FXR1	1.05583	8.12884	5.47081	0.000318945	0.00964391	0.500697
HMGA1	1.05582	9.04011	6.13535	0.00013316	0.00640771	1.3923
CRY2	1.05514	7.72649	5.39629	0.000353104	0.0100738	0.396618
C11orf80	1.05489	7.07859	4.26983	0.0018111	0.0228761	-1.27695
PNPLA6	1.05487	8.99916	5.57687	0.000276317	0.00909694	0.647401
SH3RF1	1.05328	7.09801	5.00567	0.000609748	0.0129852	-0.162635
TCEAL1	1.05308	12.2051	4.06193	0.0024978	0.027459	-1.60523
IMPDH1	1.05164	6.94926	3.52883	0.00584378	0.0442814	-2.46923
KDM4D	1.05122	6.74422	5.44503	0.00033034	0.00979255	0.464792
LPCAT4	1.05104	8.0855	4.6065	0.00109003	0.0175289	-0.757539
OBSL1	1.05084	10.8868	5.83794	0.000195397	0.00779479	1.00136
PLK1	1.05025	8.53763	5.95593	0.000167583	0.00719058	1.15801
COX10	1.04851	6.59812	5.64074	0.000253635	0.00871625	0.734942
MAT2A	1.04734	12.7304	5.06271	0.000562228	0.0124013	-0.0795412
HCCS	1.04716	6.55647	3.892	0.00326244	0.031706	-1.87743
DCTPP1	1.04694	10.5238	4.57703	0.00113884	0.018006	-0.802386
NDUFA1	1.04647	15.6084	3.6291	0.00496733	0.0401279	-2.30462
DPY19L2P2	1.04608	7.21315	4.62162	0.00106585	0.0173478	-0.73458
NPAT	1.0459	7.14059	4.36182	0.00157399	0.0214116	-1.1335
FAM54B	1.04582	10.2315	7.16089	3.87e-05	0.0036552	2.64422
SLC25A11	1.0436	10.4028	4.99396	0.000620027	0.0131446	-0.179756
KBTBD4	1.04346	7.65575	5.32847	0.000387631	0.0106234	0.301155
UBE3B	1.04163	6.84297	6.86711	5.44e-05	0.0043015	2.30032
MOSPD2	1.04155	7.30448	4.29173	0.00175142	0.022506	-1.24271
RAB4B	1.04152	8.72612	4.26875	0.00181411	0.0229	-1.27865
ATCAY	1.04042	7.108	3.90061	0.00321829	0.0315869	-1.86355
KCND3	1.03933	5.8255	3.58326	0.00534964	0.0418871	-2.37977
GPT2	1.03889	7.95517	4.6067	0.00108971	0.0175289	-0.757244
PSD	1.03855	8.71374	6.08389	0.000142177	0.00662189	1.32558
ODF3L1	1.03843	6.65415	3.77002	0.00396094	0.0354038	-2.07478
ARHGEF2	1.03805	7.6342	3.72137	0.00428182	0.0369155	-2.15393
ARL6IP1	1.03791	9.97118	4.4496	0.00137826	0.0199519	-0.997666
RCCD1	1.03739	8.27754	3.56335	0.00552515	0.0427361	-2.41247
LOC100131434	1.03723	8.71852	3.83085	0.00359481	0.0335831	-1.97616
SDCBP2	1.03667	5.99638	5.16615	0.000485888	0.0116721	0.0698892
SCAP	1.03507	11.6045	4.87921	0.000731134	0.0142195	-0.348577
MTMR8	1.03465	6.43661	3.77202	0.0039483	0.0353673	-2.07154
LRRC16A	1.03435	6.48163	3.43528	0.00680724	0.048662	-2.6235
FRAT1	1.03414	5.04583	3.87984	0.00332588	0.032092	-1.89703
APH1A	1.03403	7.07397	4.35927	0.0015801	0.0214126	-1.13746
C12orf49	1.03402	6.90974	4.47156	0.00133345	0.0195275	-0.963846
EFCAB11	1.03365	8.49103	4.83884	0.000775132	0.0147314	-0.408428
DTNB	1.03244	9.78537	4.58192	0.00113058	0.0179586	-0.794937
FAM69A	1.03082	7.01433	5.24286	0.000436477	0.011179	0.179681
BAHD1	1.0302	11.5396	5.54151	0.000289803	0.00933672	0.598682
PRPF40B	1.03007	9.34508	4.56378	0.00116153	0.0181903	-0.822575
EPB41L1	1.03002	6.97369	5.69106	0.000237183	0.0084464	0.803467
GNA12	1.02981	7.95262	4.18861	0.00205201	0.0246326	-1.40455
MFSD3	1.02954	9.96427	5.76657	0.000214613	0.00808171	0.905597
DNAJC19	1.02919	9.78443	5.9476	0.0001694	0.00721597	1.14701
PCDP1	1.02902	6.35488	3.63648	0.0049085	0.0398628	-2.29254
ZFYVE19	1.02899	10.2809	6.01371	0.00015555	0.00695998	1.23398
BCL9	1.02743	8.70789	4.62574	0.00105938	0.0173101	-0.728338
INPP5E	1.02739	6.76969	7.62709	2.3e-05	0.00280788	3.16704
CELSR2	1.02699	8.80582	5.49289	0.000309516	0.00956706	0.531389
THOC2	1.02688	6.78365	4.13593	0.00222623	0.0257967	-1.48776
PRKRIR	1.02626	8.05991	5.65588	0.000248561	0.00861266	0.755593
DNPEP	1.02576	8.17151	4.20534	0.00199974	0.0242196	-1.3782
PPM1A	1.02568	8.29688	4.42644	0.00142726	0.0203645	-1.0334
NAP1L1	1.02568	7.90252	4.48444	0.00130789	0.0193833	-0.944042
SRGAP2	1.02536	11.2287	6.14974	0.000130752	0.00636508	1.41089
MAPK9	1.0251	9.1273	5.77049	0.000213505	0.00808171	0.910883
FAM123B	1.02419	7.69371	3.72714	0.0042424	0.0367451	-2.14453
NOL4	1.0233	11.4256	3.85809	0.00344257	0.0327959	-1.93213
RNASEK	1.02292	14.383	3.69545	0.00446376	0.0377973	-2.19618
CDS1	1.02209	8.53127	4.06467	0.00248712	0.0274137	-1.60086
FADS1	1.02196	12.2712	4.02902	0.0026296	0.0283124	-1.65768
HIST1H2BE	1.02123	9.87554	4.91314	0.000696209	0.0138994	-0.298445
RELT	1.02106	6.49711	4.42875	0.00142228	0.0203645	-1.02983
MANEAL	1.02067	11.5263	4.34652	0.00161103	0.0215741	-1.15729
POC5	1.02063	7.53907	4.47202	0.00133254	0.0195263	-0.963147
SLC26A8	1.02051	4.73514	3.64506	0.00484105	0.0395847	-2.27851
POLR1D	1.02025	8.94549	5.38803	0.000357128	0.0101501	0.385022
RIMKLB	1.01997	6.56877	5.94471	0.000170036	0.00722989	1.14319
CCNB1	1.01969	8.64622	3.52031	0.00592542	0.0446662	-2.48326
C9orf40	1.01968	8.72164	3.77031	0.00395908	0.0354006	-2.07431
ATP1A4	1.01919	9.66977	4.93903	0.000670768	0.0136549	-0.260318
ALOX12	1.01865	5.09129	4.71153	0.000933446	0.0161788	-0.598758
RAB5B	1.01745	6.21103	4.56234	0.00116403	0.0181903	-0.824777
UTP14A	1.01736	7.09374	4.22266	0.00194712	0.0238024	-1.35095
TERF2	1.01728	7.76431	4.38179	0.00152702	0.0211645	-1.10251
ARHGEF3	1.01715	11.1906	4.37243	0.00154883	0.0213099	-1.11702
FABP3	1.01688	7.85452	7.86277	1.78e-05	0.00246523	3.42108
STAMBPL1	1.01614	8.41393	5.1097	0.000526063	0.0120339	-0.0114555
BRWD1	1.01579	10.0447	5.5788	0.000275601	0.00909449	0.650052
ARMC10	1.01437	9.12282	5.71699	0.000229156	0.00829945	0.838637
ARFGAP2	1.01407	8.93348	5.70018	0.000234325	0.00841995	0.815848
KDM1A	1.01407	8.69679	5.34614	0.000378299	0.0104289	0.326094
GM2A	1.01402	6.98535	5.76602	0.000214768	0.00808171	0.90486
RFC3	1.01398	6.59588	5.12812	0.000512575	0.0118998	0.0151398
LRPPRC	1.01307	9.68983	4.90514	0.000704286	0.0139706	-0.310259
MAZ	1.01261	6.95082	5.57235	0.000278001	0.00912046	0.641189
CNTN1	1.01256	12.2995	4.96954	0.000642053	0.0134001	-0.215509
SIRT2	1.01233	10.4595	4.57724	0.00113847	0.018006	-0.802053
UBAP1	1.01219	9.5431	4.9176	0.00069176	0.01389	-0.29188
SLC25A4	1.01214	13.4174	3.81914	0.00366247	0.0339372	-1.99513
FAAH	1.01085	8.47882	4.13243	0.00223832	0.0258844	-1.49329
SPAG7	1.00972	10.252	6.72543	6.44e-05	0.00466595	2.13033
UBL7	1.00926	8.94759	5.57837	0.000275759	0.00909449	0.649466
SSBP4	1.0091	10.9512	5.24249	0.000436703	0.011179	0.179152
DYNC1I1	1.00782	10.1144	4.33561	0.00163801	0.0217153	-1.17426
DBNL	1.00769	8.54866	5.17608	0.000479161	0.0115826	0.0841619
TNXB	1.00709	8.43491	3.95756	0.00294167	0.0300685	-1.77201
PODXL2	1.0066	8.54431	5.2237	0.000448292	0.0112913	0.152339
ZMAT5	1.00615	8.61599	7.92524	1.67e-05	0.00235871	3.48729
NIT2	1.00501	7.36498	4.5115	0.00125588	0.0189265	-0.902518
SOX6	1.00451	7.57752	3.57265	0.00544243	0.042305	-2.39719
ITGB3BP	1.00409	8.56809	3.87227	0.00336598	0.0323035	-1.90923
ZNF124	1.00401	6.735	3.4356	0.00680366	0.0486513	-2.62297
ZFHX2	1.00356	10.8844	3.73255	0.00420572	0.0365837	-2.13571
HIST1H2BM	1.00331	10.8976	5.69242	0.000236755	0.00844464	0.805311
FARP2	1.00221	7.51929	4.52859	0.00122418	0.0186427	-0.876353
LOXHD1	1.00207	6.1043	4.89105	0.000718738	0.0141529	-0.331064
SRSF7	1.00074	9.77383	5.74538	0.000220701	0.00815814	0.877031
SLC30A1	1.00048	8.74095	5.52643	0.000295771	0.00941612	0.577841
C3orf78	-1.00108	11.7684	-4.31063	0.00170159	0.0221483	-1.2132
CNTLN	-1.00146	9.42678	-6.50208	8.43e-05	0.00534122	1.85675
TH	-1.00354	4.53431	-3.78753	0.00385171	0.0349196	-2.04636
C5orf39	-1.00378	7.26125	-3.95318	0.00296208	0.0302067	-1.77905
FAM155A	-1.0055	12.8579	-4.89669	0.000712914	0.0140824	-0.322731
FKSG2	-1.00603	6.82291	-5.51315	0.000301135	0.00944344	0.559463
TLCD1	-1.00634	8.1296	-7.41527	2.9e-05	0.00320841	2.9329
POTEG	-1.01296	5.56129	-5.9367	0.000171809	0.00728881	1.13261
ATP11B	-1.01541	7.35746	-3.9174	0.00313402	0.0311993	-1.83653
RXRA	-1.01558	7.15864	-4.2059	0.00199802	0.0242144	-1.37732
NRN1	-1.01587	9.14604	-4.52271	0.00123498	0.0187615	-0.885341
AVPI1	-1.01622	9.54382	-4.70551	0.00094173	0.0162556	-0.607807
TMEM56	-1.01627	7.5598	-3.58764	0.00531188	0.041698	-2.3726
TRIM35	-1.01794	8.58997	-6.02467	0.000153375	0.00692449	1.24833
OBP2A	-1.01801	4.08079	-4.01299	0.00269644	0.0287231	-1.68328
IKBIP	-1.01901	8.55739	-3.41971	0.006983	0.0494394	-2.64924
C1orf96	-1.01957	9.89025	-3.90581	0.00319193	0.0314595	-1.85518
RPL23AP32	-1.02145	10.0335	-6.29062	0.000109508	0.00586173	1.59129
LRRC37A2	-1.02304	10.4223	-3.87371	0.00335831	0.0322545	-1.90691
EXOC3L2	-1.02406	12.3824	-3.90354	0.00320341	0.0314998	-1.85883
RAP1B	-1.02476	9.15371	-6.69177	6.7e-05	0.00476745	2.08955
ZNF302	-1.03099	9.65271	-5.20648	0.000459201	0.0114208	0.127724
PTPN21	-1.03315	7.38169	-4.72698	0.000912515	0.015974	-0.575535
NR3C1	-1.03412	9.76395	-4.60857	0.00108669	0.0175202	-0.7544
GUSB	-1.03467	11.675	-4.32219	0.00167183	0.0219687	-1.19516
SKIL	-1.03506	7.76937	-5.1499	0.000497102	0.0117796	0.0465262
HGFAC	-1.03685	5.35757	-4.29704	0.00173725	0.0224173	-1.2344
CYP2R1	-1.03755	11.019	-4.09585	0.0023692	0.0266686	-1.5513
GDPD3	-1.03889	6.00043	-5.06938	0.000556935	0.0123497	-0.069855
TMSB10	-1.03993	12.6665	-3.43132	0.00685147	0.0488204	-2.63004
UFM1	-1.04165	9.73373	-5.99202	0.000159955	0.00704286	1.20551
ZMIZ2	-1.04219	11.9789	-5.47146	0.000318662	0.00964391	0.501606
NEDD4L	-1.0451	11.6981	-3.41232	0.00706797	0.0497508	-2.66144
OLFM2	-1.04556	6.1275	-6.48312	8.63e-05	0.00534141	1.8332
EPHX1	-1.04619	8.96001	-3.5866	0.0053208	0.0417389	-2.3743
TMEM19	-1.0465	8.16871	-5.01605	0.000600788	0.0128818	-0.147475
SEL1L3	-1.0466	6.30928	-3.58749	0.00531312	0.041698	-2.37283
TRPS1	-1.04846	6.97423	-4.15379	0.00216545	0.0253725	-1.4595
TST	-1.04932	11.2372	-4.17196	0.00210546	0.0249803	-1.43082
CDH26	-1.05509	7.70368	-5.10118	0.000532433	0.0120923	-0.0237813
CHMP2B	-1.05574	9.42367	-6.64113	7.12e-05	0.00498198	2.02788
CCP110	-1.05653	10.1997	-5.14836	0.000498177	0.0117879	0.0443136
ERICH1	-1.05795	9.79753	-5.5216	0.000297707	0.00944028	0.571167
LOC442421	-1.05935	10.6719	-6.65937	6.97e-05	0.00491947	2.05013
TMEM39A	-1.06563	9.61648	-5.75628	0.000217546	0.00811322	0.891738
DNAJB5	-1.06587	10.8367	-4.74718	0.000885902	0.0157896	-0.545225
SLC2A1	-1.06738	9.32515	-4.01383	0.00269288	0.0287225	-1.68193
POTEB	-1.0677	5.64611	-7.14223	3.95e-05	0.00370025	2.62272
RASL11A	-1.06895	6.27958	-3.47786	0.00634969	0.0465288	-2.5532
MANF	-1.0696	12.9816	-3.73835	0.00416681	0.0363848	-2.12627
C2orf55	-1.07115	8.84614	-4.33633	0.00163622	0.0217028	-1.17314
AP3S1	-1.07118	11.5649	-4.20466	0.00200184	0.0242294	-1.37927
SPCS3	-1.07229	11.3982	-4.79609	0.000824828	0.0152373	-0.472071
P4HB	-1.0724	14.2801	-4.41356	0.0014553	0.0205856	-1.05331
SYNGR2	-1.07268	14.3424	-6.38465	9.74e-05	0.00562289	1.71011
ZNF165	-1.07561	9.31571	-4.67849	0.00097994	0.0166179	-0.648532
MICAL3	-1.07619	7.92909	-7.16405	3.86e-05	0.00365443	2.64786
MSN	-1.07764	5.30279	-3.70524	0.00439409	0.037401	-2.18021
LOC100271840	-1.08241	5.04593	-5.86188	0.000189375	0.00761344	1.0333
AFMID	-1.08589	5.2941	-3.65675	0.00475065	0.0391927	-2.25939
KLK7	-1.08775	4.42494	-5.65769	0.000247962	0.00860682	0.758059
LEPRE1	-1.08862	10.3483	-6.22951	0.000118226	0.00603867	1.51338
DUSP22	-1.08872	9.41992	-5.44344	0.000331058	0.0097938	0.46257
GPR180	-1.08887	8.59949	-4.97285	0.000639021	0.0133823	-0.210661
ERBB2	-1.089	8.25488	-3.55993	0.00555594	0.042895	-2.4181
C18orf1	-1.08919	4.95222	-3.57981	0.00537967	0.0420168	-2.38544
TMEM106B	-1.09333	9.96008	-5.76952	0.00021378	0.00808171	0.909568
CA3	-1.0938	5.66068	-4.23012	0.00192492	0.0236406	-1.33924
LOC100288860	-1.09387	5.39317	-3.43553	0.00680445	0.0486513	-2.62308
ZNF575	-1.09433	10.9802	-4.22383	0.00194364	0.0238006	-1.34912
GCNT2	-1.09489	4.09593	-8.31198	1.11e-05	0.00188589	3.88711
ASS1	-1.09543	7.45316	-3.8219	0.0036464	0.0338633	-1.99066
EIF2C3	-1.09549	10.9473	-6.38785	9.7e-05	0.0056125	1.71413
RTKN2	-1.0959	5.8735	-3.85491	0.00345999	0.0329119	-1.93727
PRDM5	-1.09913	7.96405	-4.39649	0.00149338	0.0208673	-1.07973
KIAA0825	-1.10011	6.56108	-3.76555	0.00398935	0.0355312	-2.08205
VGLL1	-1.10051	5.06466	-6.48123	8.65e-05	0.00534497	1.83086
CDHR5	-1.10182	5.7189	-4.15684	0.00215526	0.0252971	-1.45469
LINC00471	-1.10207	5.13173	-3.43775	0.00677978	0.0485672	-2.61942
SSR3	-1.10615	9.15395	-6.80676	5.84e-05	0.00449537	2.22825
NPAS2	-1.107	6.57826	-3.43822	0.00677456	0.0485389	-2.61864
AMOTL1	-1.10878	4.50237	-4.45626	0.00136451	0.0198247	-0.987408
SUGT1	-1.11026	9.21339	-5.85927	0.000190022	0.0076313	1.02982
POTEE	-1.11149	6.42815	-5.59102	0.000271108	0.00905218	0.666853
BFSP2	-1.11182	4.79012	-3.45286	0.00661428	0.0478002	-2.59445
HMHB1	-1.11448	8.83473	-4.6219	0.00106542	0.0173478	-0.73416
FAM8A1	-1.11508	7.16185	-7.25341	3.48e-05	0.00351519	2.75019
SLCO1A2	-1.11608	4.72301	-4.58093	0.00113224	0.0179617	-0.796438
FKBP14	-1.11705	9.59459	-5.25855	0.00042705	0.011075	0.202033
TMTC3	-1.11915	8.92915	-4.18025	0.00207866	0.0248097	-1.41773
PDCD1	-1.12315	7.55524	-5.62222	0.000259998	0.00883807	0.70962
ZNF667	-1.12454	9.14744	-5.62351	0.000259549	0.00883347	0.71139
ZDHHC21	-1.1248	10.5575	-4.95645	0.000654214	0.0135042	-0.234726
TMEM38B	-1.12566	7.97317	-4.35175	0.00159827	0.0214873	-1.14915
TYRO3	-1.12588	6.89443	-4.71926	0.000922907	0.0161006	-0.587131
C4orf26	-1.12671	5.20221	-4.94771	0.000662468	0.0135944	-0.247566
DEPDC7	-1.12754	5.21531	-3.55775	0.00557556	0.0429847	-2.42166
LOC400236	-1.12781	8.232	-4.67885	0.000979421	0.0166179	-0.64799
LOC100506795	-1.12823	4.9728	-7.43186	2.85e-05	0.0031826	2.95144
ACTR3B	-1.13021	10.3062	-5.5457	0.000288169	0.00932246	0.604463
FBN3	-1.13165	7.79715	-5.62328	0.000259628	0.00883347	0.711075
WNK4	-1.13204	5.53823	-3.94682	0.00299188	0.0304282	-1.78925
HM13	-1.13304	8.67335	-5.90545	0.000178921	0.00740682	1.09124
FNDC3B	-1.14115	10.235	-5.17944	0.000476914	0.0115708	0.0889755
PPAPDC1B	-1.14165	7.7628	-4.53935	0.00120464	0.0184771	-0.85988
RBPMS	-1.14786	5.10624	-3.948	0.0029863	0.0303879	-1.78735
B3GALNT2	-1.15213	9.42575	-3.92753	0.00308427	0.0309166	-1.82023
CHD7	-1.1551	10.446	-4.7731	0.000852951	0.0154742	-0.506407
NPAS3	-1.1564	6.42635	-3.41793	0.0070033	0.0495179	-2.65217
IQCK	-1.1586	11.3985	-3.67374	0.00462238	0.0386182	-2.23162
LMAN1	-1.15865	8.42168	-3.73778	0.00417064	0.0363848	-2.1272
ZNF503	-1.16173	8.99802	-3.42076	0.00697094	0.0493819	-2.64749
LRRFIP1	-1.16194	8.15207	-5.48035	0.000314835	0.00959434	0.513962
ANXA2	-1.16201	4.73804	-3.80875	0.00372358	0.034262	-2.01196
STK32C	-1.16525	6.99084	-4.48358	0.00130958	0.0193833	-0.945364
AP1S2	-1.16699	8.66887	-3.97566	0.0028591	0.0296385	-1.74299
FOXP1	-1.16912	10.1239	-5.57725	0.000276176	0.00909694	0.647922
C1orf114	-1.17023	10.7386	-4.70204	0.000946552	0.0163089	-0.613036
C12orf26	-1.17066	6.33412	-4.16901	0.00211509	0.0250364	-1.43547
CMIP	-1.17158	9.87979	-3.74208	0.00414201	0.0362812	-2.12021
FLJ42875	-1.17163	6.19922	-5.69002	0.000237512	0.0084476	0.802051
SMARCA2	-1.17524	9.45586	-3.80062	0.0037721	0.0345202	-2.02512
C20orf3	-1.17584	13.4528	-7.1236	4.04e-05	0.00374731	2.6012
MFAP3L	-1.17825	5.71389	-4.20342	0.00200566	0.02426	-1.38121
CSPP1	-1.1783	9.44817	-6.74666	6.28e-05	0.00462191	2.15598
LINC00115	-1.17845	8.33944	-4.94848	0.000661734	0.0135923	-0.246432
TULP3	-1.17913	7.67741	-4.27423	0.00179893	0.0227983	-1.27007
APLN	-1.1808	7.98447	-3.56733	0.00548963	0.0425113	-2.40594
TOR1AIP2	-1.18288	7.10819	-7.15947	3.88e-05	0.0036552	2.64259
DERL1	-1.18466	9.42756	-3.57835	0.00539241	0.0420378	-2.38784
HEXIM2	-1.18556	10.9343	-4.7677	0.000859716	0.0155147	-0.514497
CAMK4	-1.18712	5.63047	-3.59305	0.00526552	0.0414609	-2.36371
TOB2	-1.18721	9.39102	-6.96012	4.88e-05	0.00411622	2.41044
LOC100507493	-1.18809	9.12127	-7.67018	2.19e-05	0.00279087	3.214
C8orf83	-1.18947	10.0405	-6.32269	0.000105214	0.00583018	1.63196
AK5	-1.19094	4.45494	-4.80355	0.000815926	0.0151444	-0.460957
REEP1	-1.19557	11.0377	-5.58641	0.000272794	0.00906342	0.660515
MDK	-1.19761	14.2965	-3.80007	0.0037754	0.0345202	-2.02601
YPEL2	-1.19918	7.44596	-5.75812	0.000217017	0.00811322	0.894222
SOX9	-1.20037	5.73821	-4.42688	0.00142631	0.0203645	-1.03272
TBX3	-1.20062	5.1472	-3.73313	0.00420181	0.0365834	-2.13477
MYO5B	-1.20105	10.6878	-4.00363	0.0027363	0.0289945	-1.69824
SLC34A1	-1.20113	6.25074	-4.31452	0.0016915	0.0220781	-1.20712
FAM134B	-1.20201	11.5549	-4.71346	0.000930806	0.0161788	-0.595859
SLITRK3	-1.20351	4.38719	-3.61418	0.00508859	0.0406202	-2.32907
PLXNA2	-1.20386	7.70025	-3.81302	0.00369832	0.034093	-2.00504
FAM13A	-1.20468	9.48773	-3.52547	0.00587581	0.0444168	-2.47476
MBNL1	-1.2055	11.7466	-5.76076	0.000216262	0.0081092	0.89778
DDX39A	-1.20768	10.9712	-4.21812	0.00196078	0.0239093	-1.3581
ARID5B	-1.20971	9.57407	-5.14468	0.000500762	0.0118291	0.0390146
GFRA3	-1.21018	6.38776	-4.48674	0.00130339	0.0193325	-0.940516
PPP2R5A	-1.21156	8.47143	-4.70167	0.000947063	0.0163103	-0.613589
STX2	-1.2133	9.26069	-5.49119	0.000310234	0.00956706	0.529018
PIEZO2	-1.21405	7.06274	-7.11706	4.07e-05	0.00374731	2.59364
ZADH2	-1.21441	9.16782	-5.45664	0.000325156	0.00973068	0.480972
NPM3	-1.21464	8.46849	-3.87238	0.0033654	0.0323035	-1.90906
ATG9B	-1.22132	5.88525	-3.84901	0.00349254	0.033146	-1.9468
CNTNAP3B	-1.22263	5.56285	-4.75679	0.000873532	0.0156454	-0.530825
SLC16A2	-1.22414	10.3065	-3.66859	0.00466089	0.0387901	-2.24004
NAB1	-1.22509	9.81735	-5.7214	0.000227819	0.00828294	0.844611
CSDC2	-1.22583	7.45003	-5.98807	0.000160771	0.00704286	1.20032
MPP5	-1.22792	7.79104	-3.45866	0.00655197	0.0475049	-2.58489
SPRY4	-1.22955	7.58479	-4.9865	0.000626666	0.0132109	-0.190664
PROZ	-1.2308	4.88285	-4.49463	0.00128805	0.0192187	-0.928403
PCSK4	-1.23101	9.18878	-3.90836	0.00317909	0.0314318	-1.85107
SLC7A14	-1.23194	10.1699	-4.86183	0.000749735	0.0144383	-0.374308
RASSF8	-1.23203	8.40498	-3.43666	0.00679192	0.0486001	-2.62122
LOC100506029	-1.23377	9.09937	-6.30367	0.000107739	0.0058334	1.60785
CYP3A5	-1.23585	4.41247	-3.90524	0.00319484	0.0314717	-1.85611
CTRB1	-1.23593	5.14476	-6.9487	4.94e-05	0.00412582	2.39698
HS3ST3B1	-1.23651	4.33699	-3.67036	0.00464757	0.0387435	-2.23713
MAGT1	-1.23652	9.28466	-3.45396	0.00660242	0.0477454	-2.59264
RIN2	-1.23777	8.94975	-3.86793	0.00338924	0.0324439	-1.91624
LOC400604	-1.2433	8.03918	-5.36576	0.00036822	0.0103001	0.353727
HN1L	-1.24803	9.07892	-6.25133	0.00011503	0.00592956	1.54126
C11orf75	-1.25166	11.5605	-3.95999	0.00293047	0.0300309	-1.76812
DNALI1	-1.25292	11.1997	-3.63008	0.00495945	0.0400911	-2.30301
ARHGEF10	-1.25428	5.95435	-4.77602	0.000849325	0.0154307	-0.502043
PHLDB3	-1.25486	9.40027	-4.23579	0.00190822	0.0235431	-1.33033
C9orf3	-1.25685	8.68799	-4.73126	0.000906807	0.0159554	-0.569109
FSTL4	-1.25764	7.00745	-3.76047	0.0040219	0.0356776	-2.09031
FSHR	-1.2603	5.11395	-5.15779	0.000491619	0.0117235	0.0578827
DMRTA1	-1.26034	5.61052	-4.03854	0.00259074	0.0280788	-1.6425
MAP6D1	-1.26166	9.02949	-5.5791	0.000275489	0.00909449	0.650468
TMEM33	-1.26607	9.94543	-8.09847	1.39e-05	0.00208314	3.66852
MYO19	-1.2669	9.01654	-4.13901	0.00221563	0.0257089	-1.48289
ANKRD37	-1.26764	9.10866	-3.833	0.00358254	0.0335017	-1.97268
WDR65	-1.26836	5.6764	-4.43023	0.00141911	0.020334	-1.02754
DSG2	-1.26851	5.08007	-4.36777	0.00155983	0.0213569	-1.12425
ARID3A	-1.27018	7.90827	-4.80855	0.000810008	0.0150819	-0.453503
NAT8	-1.27284	5.25212	-3.90791	0.00318137	0.0314358	-1.8518
CCDC39	-1.27289	5.60944	-4.82981	0.000785357	0.0148128	-0.421849
CD164	-1.27531	10.4499	-3.67157	0.00463855	0.038694	-2.23516
KIAA1244	-1.27536	11.0708	-4.32355	0.00166837	0.0219359	-1.19304
LZTFL1	-1.27612	10.0579	-5.5871	0.000272542	0.00906342	0.661462
PCDHB7	-1.27629	8.12538	-4.60303	0.00109566	0.017612	-0.762818
RBM38	-1.2802	6.17744	-3.57197	0.00544842	0.0423207	-2.3983
NBEAL1	-1.28028	7.8731	-6.06935	0.000144841	0.00667121	1.30666
HEPACAM	-1.28137	5.73484	-3.77449	0.00393274	0.0353196	-2.06752
OSTCP1	-1.28191	8.24509	-7.94025	1.64e-05	0.0023496	3.50313
HDAC4	-1.28541	6.85462	-6.60165	7.47e-05	0.00506324	1.97957
LOC401176	-1.28546	6.42879	-3.72678	0.0042448	0.0367538	-2.14511
GBA3	-1.28614	5.05112	-3.81379	0.00369378	0.0340789	-2.00379
RAB11FIP1	-1.28725	7.96034	-6.41834	9.35e-05	0.00551184	1.75238
KCNQ3	-1.2876	6.95929	-5.75631	0.000217537	0.00811322	0.891778
MYZAP	-1.28834	4.81785	-4.69264	0.000959735	0.016429	-0.627199
RGS6	-1.28837	5.7926	-3.41724	0.00701128	0.0495555	-2.65332
ASAP2	-1.29167	5.42388	-5.06294	0.00056205	0.0124013	-0.079216
NAB2	-1.29537	9.81209	-5.22882	0.000445102	0.011263	0.15965
FGFR2	-1.29738	4.777	-3.90745	0.00318367	0.0314358	-1.85254
SHOX2	-1.30289	4.35194	-4.19143	0.0020431	0.02458	-1.4001
WFIKKN2	-1.30454	5.88868	-3.85346	0.00346797	0.0329712	-1.93961
ENO3	-1.30545	8.4594	-4.7844	0.000839013	0.0153697	-0.489534
LSS	-1.30724	8.29595	-4.39657	0.00149319	0.0208673	-1.0796
CHD5	-1.30943	5.89812	-4.30465	0.00171717	0.0222741	-1.22252
RABGAP1L	-1.31243	11.3679	-3.99443	0.00277605	0.0291389	-1.71294
PAWR	-1.31303	10.5636	-5.18503	0.000473192	0.0115393	0.0969963
PEMT	-1.31395	10.9777	-4.79671	0.000824093	0.0152373	-0.471158
NACAP1	-1.3143	8.83447	-6.10602	0.000138222	0.006559	1.35431
PKD1P1	-1.31663	11.4987	-6.5732	7.73e-05	0.00518676	1.94462
IQUB	-1.32036	7.12269	-4.91641	0.000692939	0.01389	-0.293625
DNAJC3	-1.32124	11.082	-8.28039	1.15e-05	0.00191542	3.8551
ARL4A	-1.32202	7.71768	-7.67412	2.18e-05	0.00279087	3.21827
REXO2	-1.32744	10.1176	-7.82948	1.85e-05	0.00248156	3.3856
FAM181A	-1.3275	7.77982	-4.89311	0.000716609	0.0141331	-0.328025
ATP8B1	-1.32778	4.25716	-3.80832	0.00372609	0.0342651	-2.01264
EGFR	-1.33332	6.16167	-3.48317	0.00629499	0.0462475	-2.54445
POTED	-1.33332	5.17711	-6.20629	0.000121732	0.00613221	1.48365
DEPTOR	-1.33915	8.23358	-4.35931	0.00158001	0.0214126	-1.1374
SULT1C2	-1.34054	6.36264	-3.69358	0.00447718	0.037847	-2.19923
GPRIN3	-1.34121	5.64072	-3.41239	0.00706713	0.0497508	-2.66132
PTGDR	-1.34538	6.34483	-4.27185	0.00180553	0.02283	-1.27381
MDM1	-1.34541	7.07787	-4.92167	0.000687714	0.0138389	-0.285873
SLC4A11	-1.34607	7.26751	-4.0476	0.00255431	0.0278957	-1.62805
SCN7A	-1.34664	4.91802	-4.3414	0.00162362	0.0216425	-1.16524
SLC2A4	-1.34938	5.43954	-5.59491	0.000269697	0.00902796	0.672187
TP53I3	-1.35045	8.22142	-4.42679	0.00142649	0.0203645	-1.03286
NDST3	-1.35402	4.95536	-6.60522	7.44e-05	0.00506324	1.98394
FLJ11710	-1.35424	8.74931	-4.7323	0.000905428	0.0159554	-0.567551
KRT16	-1.3566	5.60098	-4.16481	0.00212886	0.0251429	-1.4421
C16orf89	-1.35673	5.35133	-3.80584	0.00374088	0.0343368	-2.01667
HEY2	-1.35963	5.41281	-3.58019	0.00537635	0.0420083	-2.38482
LOC100294362	-1.35983	6.97713	-5.66489	0.00024559	0.00858881	0.767879
SLC6A13	-1.3643	5.04749	-6.80064	5.89e-05	0.00449537	2.2209
TMX4	-1.36989	5.98981	-3.89203	0.00326229	0.031706	-1.87738
HTATIP2	-1.37077	9.64266	-3.9653	0.00290607	0.0298961	-1.7596
POU2F1	-1.37339	5.94501	-4.58335	0.00112817	0.0179354	-0.79275
C4orf34	-1.37392	11.1839	-6.73067	6.4e-05	0.00466532	2.13666
FGD4	-1.37596	10.6698	-7.19772	3.71e-05	0.00359186	2.68654
ASPG	-1.37747	5.83221	-3.73588	0.00418332	0.036471	-2.13029
RASSF9	-1.37921	4.52178	-6.43935	9.11e-05	0.00545523	1.77866
SLC12A2	-1.37992	6.85908	-4.48154	0.0013136	0.0193833	-0.948502
SGMS2	-1.38021	5.81259	-4.72686	0.000912678	0.015974	-0.575718
LOC339894	-1.38169	4.39573	-4.93642	0.000673289	0.0136729	-0.264161
DCAF12L1	-1.38344	4.59508	-5.37794	0.000362106	0.0102201	0.370859
ZNF480	-1.39342	8.9402	-4.15756	0.00215287	0.0252769	-1.45355
CSF3	-1.39433	4.45141	-5.48298	0.000313712	0.00959434	0.517618
ALDH2	-1.39454	13.2392	-4.83374	0.000780888	0.0147662	-0.416005
MIR22HG	-1.39598	9.38965	-5.36607	0.000368059	0.0103001	0.354174
PTPRR	-1.39659	5.9706	-3.84368	0.00352224	0.0333157	-1.95541
P2RX7	-1.39737	7.39747	-4.33241	0.001646	0.0217635	-1.17924
PTER	-1.39746	6.25574	-3.67132	0.00464042	0.0386946	-2.23557
C7orf50	-1.39756	8.89367	-3.57547	0.00541763	0.0421684	-2.39256
RAB17	-1.39939	5.20593	-4.95904	0.000651787	0.0134762	-0.230919
DNAI2	-1.40009	4.64465	-4.69828	0.000951806	0.0163545	-0.618705
NACC2	-1.40195	7.56836	-4.22325	0.00194536	0.0238013	-1.35003
SYTL3	-1.40301	8.25059	-5.86566	0.000188441	0.00760842	1.03835
ARHGEF26-AS1	-1.40394	6.90843	-5.54884	0.000286952	0.00931881	0.608791
CEBPD	-1.40492	13.7885	-4.68951	0.000964166	0.0164719	-0.631916
KCNG1	-1.40682	6.24026	-4.27866	0.00178679	0.0227149	-1.26314
NTF4	-1.40764	5.22979	-4.09615	0.00236808	0.0266686	-1.55081
RSPH10B	-1.41167	5.54743	-6.46174	8.86e-05	0.00542137	1.8066
HIST2H2AC	-1.41168	10.4775	-5.21213	0.00045559	0.0113913	0.135807
STAB2	-1.41266	5.9428	-3.82539	0.00362621	0.0337675	-1.98501
NANS	-1.41323	9.51255	-8.23117	1.21e-05	0.00195556	3.80499
RWDD4	-1.41355	10.19	-7.17701	3.8e-05	0.00361898	2.66276
COCH	-1.41373	8.40711	-3.76582	0.00398763	0.0355243	-2.08161
RYR3	-1.41602	5.08413	-5.51486	0.000300437	0.00944028	0.561836
CCDC57	-1.41843	8.37879	-4.58283	0.00112905	0.0179418	-0.793551
FLJ23867	-1.42113	6.40395	-5.70462	0.000232949	0.00839642	0.821867
C18orf45	-1.42407	7.36591	-4.77968	0.000844804	0.0154021	-0.496578
USP13	-1.42631	8.88359	-6.76987	6.11e-05	0.00458563	2.18395
PGM3	-1.4285	8.47596	-4.6173	0.00107271	0.0173992	-0.741148
EAF2	-1.42958	8.0747	-4.66606	0.000998065	0.0167465	-0.667299
SLC9A3R2	-1.43067	10.7691	-5.1896	0.000470171	0.0115186	0.103554
FLJ36840	-1.43114	9.23489	-3.57179	0.00545008	0.0423207	-2.39861
FAM120C	-1.43271	8.71177	-7.03725	4.46e-05	0.00393129	2.50089
C8orf48	-1.43554	4.59248	-3.43705	0.00678753	0.0485949	-2.62057
AGMO	-1.43576	6.76852	-3.55182	0.00562957	0.0432681	-2.43142
LOC400684	-1.43601	7.06302	-6.6438	7.1e-05	0.0049752	2.03114
IGSF9	-1.44176	8.02398	-5.00788	0.000607825	0.0129589	-0.159401
LOC338620	-1.44323	6.52796	-4.57629	0.00114009	0.018006	-0.80351
SOX2-OT	-1.4449	5.85902	-7.86554	1.78e-05	0.00246523	3.42403
ENTPD8	-1.44643	5.11732	-5.10764	0.000527598	0.0120548	-0.0144395
RAB30	-1.44805	7.34459	-5.74436	0.000220999	0.00816114	0.875653
TUBB8	-1.4516	6.99607	-8.60335	8.31e-06	0.00157855	4.17721
FAM111A	-1.45436	10.5686	-5.08419	0.00054538	0.0122585	-0.0483848
CHGB	-1.45514	14.5253	-3.86305	0.00341557	0.0326052	-1.92412
NCOA7	-1.45517	7.98546	-5.60116	0.000267442	0.00897334	0.680769
TCF7L2	-1.45617	10.298	-5.98574	0.000161254	0.0070558	1.19726
ROPN1L	-1.45872	7.36126	-4.93758	0.00067217	0.0136649	-0.262458
ARRDC4	-1.46028	8.72241	-6.31033	0.000106847	0.00583299	1.6163
SLC2A12	-1.46203	5.80128	-4.00155	0.00274524	0.0290345	-1.70157
FTCD	-1.46739	6.38291	-4.12157	0.00227637	0.0261397	-1.5105
LRP5	-1.47094	7.29825	-4.28269	0.00177581	0.0226396	-1.25684
LOC728431	-1.47395	7.05431	-5.73258	0.00022447	0.00824078	0.859739
MECOM	-1.47437	5.58366	-4.41142	0.00146001	0.020612	-1.05662
CALD1	-1.47701	7.55458	-3.47564	0.00637275	0.046655	-2.55686
C10orf11	-1.48104	7.54227	-3.76764	0.00397605	0.0354846	-2.07865
GPR62	-1.48123	6.7796	-5.4695	0.000319512	0.00964391	0.498882
NOS1	-1.48279	7.76342	-4.99954	0.000615102	0.0130622	-0.17159
ZBTB8A	-1.48378	9.6795	-5.19067	0.000469471	0.0115186	0.10508
MSX2P1	-1.48837	5.1149	-6.95562	4.91e-05	0.00411622	2.40514
CYP2J2	-1.49325	7.25301	-5.09302	0.000538611	0.0121649	-0.0355956
JUP	-1.49555	9.96376	-4.53985	0.00120375	0.0184771	-0.859128
RALB	-1.49788	7.45499	-4.75807	0.000871893	0.0156409	-0.528901
C22orf23	-1.49904	7.74616	-4.68277	0.000973779	0.0165673	-0.642075
NBPF22P	-1.49983	4.92412	-4.36272	0.00157185	0.0213996	-1.1321
C4orf47	-1.50262	5.76241	-5.51298	0.000301204	0.00944344	0.559228
FAM174B	-1.50502	11.6802	-3.43652	0.00679343	0.0486001	-2.62145
ADSSL1	-1.50878	8.97228	-4.12498	0.00226436	0.0260722	-1.5051
KCNAB1	-1.51178	5.98149	-5.42425	0.000339845	0.00992116	0.435773
HTATSF1	-1.51203	13.6709	-7.45906	2.77e-05	0.00311554	2.98177
MEGF6	-1.51282	7.05963	-3.54405	0.00570102	0.0435511	-2.44419
DNAJC12	-1.51304	10.5715	-6.02396	0.000153516	0.00692449	1.24739
SHISA2	-1.51365	5.14549	-3.99451	0.00277574	0.0291389	-1.71283
CLDN3	-1.51415	10.8573	-4.68201	0.000974877	0.0165769	-0.643228
KIAA1652	-1.51675	10.2743	-7.51102	2.61e-05	0.0030228	3.03943
KIAA0513	-1.52162	12.6056	-3.86714	0.00339352	0.0324767	-1.91753
PRUNE2	-1.52605	8.55646	-4.09906	0.00235741	0.0266155	-1.54621
IGSF10	-1.52825	4.79922	-4.24556	0.00187978	0.0233179	-1.31499
DCBLD1	-1.53075	9.10733	-4.29513	0.00174233	0.0224534	-1.23739
INPP5F	-1.53447	10.8903	-3.96697	0.00289848	0.0298657	-1.75693
EDN2	-1.53696	5.29645	-3.63189	0.00494498	0.040053	-2.30005
CCL27	-1.54028	6.44528	-4.28364	0.00177323	0.0226396	-1.25536
WDR66	-1.54171	8.20548	-5.35495	0.000373735	0.0103666	0.338515
CERK	-1.54229	8.62074	-4.9828	0.000629987	0.013264	-0.196078
PDLIM5	-1.54287	10.0194	-4.3595	0.00157956	0.0214126	-1.13711
ZNF462	-1.54336	5.47138	-6.95649	4.9e-05	0.00411622	2.40616
BMP8B	-1.5442	4.92447	-4.15073	0.00217575	0.0254107	-1.46435
TRIM6	-1.54423	7.4607	-4.27321	0.00180176	0.0228053	-1.27167
MSI2	-1.54617	8.36112	-4.96039	0.000650525	0.0134675	-0.228935
CECR2	-1.54997	7.81982	-7.18605	3.76e-05	0.00360463	2.67314
BVES	-1.55105	7.85165	-3.78081	0.00389324	0.0351157	-2.05726
TUBA8	-1.55231	9.42851	-5.25284	0.000430458	0.0110983	0.193894
ESRP2	-1.55576	9.01078	-3.78226	0.00388425	0.0350731	-2.05491
MFSD9	-1.55583	8.36217	-7.67149	2.19e-05	0.00279087	3.21542
C16orf82	-1.55678	5.12278	-4.38246	0.00152545	0.0211505	-1.10146
C6orf146	-1.55922	3.59752	-3.47134	0.00641763	0.0469288	-2.56396
SEC16B	-1.56133	6.00203	-5.47592	0.000316734	0.00962738	0.507813
KRT8	-1.56157	11.5712	-3.69045	0.00449977	0.0379485	-2.20433
RNF125	-1.56599	6.73958	-3.63311	0.00493528	0.0400363	-2.29806
KCTD4	-1.56935	7.18475	-4.47638	0.00132384	0.019492	-0.956444
KLK8	-1.57151	5.12368	-7.01956	4.55e-05	0.00397982	2.48021
OLFM1	-1.57537	9.77801	-3.83127	0.00359245	0.0335831	-1.97549
SARDH	-1.57591	5.53638	-3.73299	0.00420277	0.0365834	-2.135
C6orf52	-1.57597	4.9437	-5.78764	0.000208735	0.0080396	0.933953
IRF7	-1.57633	10.4491	-4.00393	0.002735	0.0289945	-1.69776
RELL1	-1.5784	8.64061	-3.86139	0.00342457	0.0326741	-1.9268
CREM	-1.58029	9.63945	-4.47605	0.00132449	0.019492	-0.956949
GIPR	-1.58128	7.42965	-5.3273	0.000388258	0.0106234	0.299502
RPL22	-1.58166	9.1098	-6.17873	0.000126041	0.0062513	1.44824
UGT8	-1.58339	4.06328	-3.89559	0.00324398	0.0316574	-1.87165
ANKRD23	-1.58379	9.61088	-4.85987	0.000751871	0.0144592	-0.377223
PRR5	-1.58523	10.068	-6.75838	6.19e-05	0.00459374	2.17011
RPN1	-1.58647	12.3095	-8.90061	6.2e-06	0.00135713	4.46374
MARVELD1	-1.58743	11.4252	-3.96088	0.00292635	0.030005	-1.76668
PRKCZ	-1.58997	6.72136	-10.1334	2e-06	0.000758006	5.5584
SLC39A12	-1.59248	5.6816	-5.53453	0.000292549	0.0093531	0.589041
ITGB1	-1.59289	12.2386	-6.95926	4.88e-05	0.00411622	2.40942
KIAA1257	-1.59297	9.03073	-6.33146	0.000104072	0.00581045	1.64305
PNLDC1	-1.59389	4.71387	-4.74695	0.000886199	0.0157896	-0.545568
ADAMTS12	-1.59735	4.27613	-3.94264	0.00301164	0.0305079	-1.79596
MPST	-1.60002	9.67657	-9.63027	3.13e-06	0.000934427	5.12903
A4GALT	-1.60177	6.48802	-4.95163	0.000658748	0.013568	-0.2418
KCNQ1	-1.60194	8.47561	-4.12332	0.0022702	0.0261167	-1.50773
PALLD	-1.60365	11.0937	-4.35119	0.00159962	0.0214961	-1.15001
TMEM139	-1.60554	5.98259	-4.07641	0.00244202	0.0270672	-1.58219
C19orf33	-1.61465	9.06026	-5.03147	0.000587741	0.012757	-0.12499
IL1RAPL1	-1.61922	4.5829	-5.20676	0.000459024	0.0114208	0.128119
TNNT2	-1.6231	5.62013	-4.85221	0.000760258	0.0145664	-0.388583
HYAL3	-1.62523	7.38491	-7.65072	2.24e-05	0.00280006	3.19282
FAM98A	-1.62744	9.26764	-6.85876	5.5e-05	0.00431708	2.29037
ERN1	-1.63011	8.84475	-3.45817	0.0065572	0.0475062	-2.5857
LRRC14	-1.63626	10.3265	-5.55929	0.000282933	0.00923399	0.623209
DCLK3	-1.63954	5.36633	-6.16217	0.000128709	0.00631465	1.42692
NOXO1	-1.64572	7.975	-4.78808	0.000834512	0.0153268	-0.484024
LINC00340	-1.64617	7.32296	-3.4134	0.00705553	0.049719	-2.65967
RSPO2	-1.64792	5.52296	-4.05881	0.00250997	0.0275606	-1.61019
ARVCF	-1.65187	7.03216	-5.16063	0.000489663	0.0117065	0.0619649
SASH1	-1.65319	10.4949	-3.53516	0.00578399	0.04397	-2.45882
ZC3HAV1L	-1.6557	8.38046	-5.71224	0.000230604	0.00832786	0.832202
DMD	-1.65672	8.08247	-3.90745	0.00318368	0.0314358	-1.85254
SLITRK5	-1.66475	4.31257	-5.64789	0.000251226	0.0086651	0.744696
ALDH1A2	-1.66512	5.20959	-4.08539	0.0024081	0.0268813	-1.56792
PCSK6	-1.66601	4.99041	-6.25581	0.000114385	0.00592881	1.54698
CNTNAP3	-1.66689	5.21986	-5.83737	0.000195543	0.00779479	1.00059
GPR98	-1.66893	10.3381	-5.14398	0.000501258	0.0118333	0.0380011
CGN	-1.67167	8.53385	-4.70262	0.000945746	0.016306	-0.612164
ASPRV1	-1.67371	8.78138	-5.03796	0.000582343	0.0127035	-0.115541
IL17RB	-1.67868	5.4865	-4.6396	0.00103786	0.0170843	-0.707329
CD99P1	-1.67891	6.8148	-4.3537	0.00159353	0.0214671	-1.14612
GREB1L	-1.68058	5.71317	-5.66704	0.000244887	0.00857917	0.77081
PNPLA7	-1.68576	6.62129	-5.38339	0.00035941	0.010169	0.378506
PSTPIP1	-1.68802	7.85347	-3.91713	0.00313534	0.0312041	-1.83696
DNAH11	-1.69547	4.67934	-4.5204	0.00123927	0.0188039	-0.888885
GALNT13	-1.69832	5.23506	-4.52688	0.0012273	0.0186751	-0.878958
DNAH5	-1.69864	8.16353	-3.42754	0.00689397	0.0490397	-2.63628
WIPI1	-1.70032	10.1719	-7.08986	4.2e-05	0.00380761	2.56212
MCTP1	-1.70041	6.90615	-5.16131	0.000489198	0.0117065	0.0629369
CREB3L2	-1.7023	8.22913	-7.36425	3.07e-05	0.00331419	2.87567
POF1B	-1.70351	4.09794	-5.05697	0.000566823	0.0124807	-0.0878772
SRPRB	-1.70697	10.9331	-9.78799	2.71e-06	0.000858166	5.26611
LIMS3	-1.70945	7.55725	-3.4838	0.00628849	0.0462475	-2.54341
PAMR1	-1.7128	7.15943	-3.82499	0.00362852	0.0337792	-1.98566
LAIR2	-1.71414	4.8707	-6.9318	5.04e-05	0.00418959	2.37703
GLIS3	-1.7156	7.25602	-6.97603	4.79e-05	0.00409731	2.42916
DPPA4	-1.71767	4.62085	-4.21994	0.00195529	0.0238741	-1.35523
ID2	-1.72025	11.1247	-5.96077	0.000166538	0.00717026	1.16439
CD99	-1.72258	9.85674	-3.53274	0.00580674	0.0440827	-2.46279
ARL17B	-1.72573	8.92525	-3.88383	0.00330491	0.0319619	-1.89059
RIIAD1	-1.73146	12.8464	-9.90887	2.44e-06	0.000811406	5.36962
C10orf125	-1.7327	8.93356	-4.10849	0.00232308	0.0263782	-1.53123
RPS6KA2	-1.73414	10.5147	-3.77186	0.00394934	0.0353673	-2.0718
MUC15	-1.74307	5.8353	-5.30443	0.000400722	0.0107785	0.267163
CLGN	-1.7483	10.1557	-5.55306	0.000285319	0.00928769	0.614624
FBN2	-1.75072	5.31586	-4.93423	0.000675414	0.0136991	-0.267389
CHST1	-1.7519	6.00362	-3.89714	0.00323599	0.0316214	-1.86914
ZNF608	-1.75452	5.61144	-6.60299	7.46e-05	0.00506324	1.98121
SCD5	-1.75677	8.24243	-4.26012	0.00183826	0.0230835	-1.29217
SNORD114-3	-1.75951	5.06519	-5.81238	0.000202056	0.00791192	0.967153
APOA1	-1.76033	5.11527	-8.46142	9.58e-06	0.0017363	4.03707
DCLK1	-1.76395	9.72401	-3.48693	0.00625643	0.0461084	-2.53824
B3GNT5	-1.76554	6.96776	-4.83314	0.000781577	0.0147718	-0.416908
WNT3	-1.77039	8.2415	-3.86407	0.00341004	0.032585	-1.92247
PDIA4	-1.77354	9.61199	-6.4085	9.46e-05	0.00552742	1.74005
MPO	-1.77365	4.58572	-4.85401	0.000758278	0.0145433	-0.385912
ESRRG	-1.77612	7.69365	-3.87749	0.00333825	0.0321604	-1.90081
ARHGEF26	-1.7762	6.72106	-4.14371	0.00219955	0.0255934	-1.47545
LOC100509213	-1.77743	7.30614	-4.5178	0.00124409	0.0188443	-0.892865
LRIG1	-1.77851	11.2704	-4.09853	0.00235934	0.0266213	-1.54704
MST1	-1.78123	11.4643	-6.07025	0.000144676	0.00667121	1.30783
ATP11A	-1.78371	9.26621	-5.16101	0.000489401	0.0117065	0.0625131
ZNF185	-1.78409	8.71896	-5.48853	0.000311354	0.00956706	0.525335
EPHA4	-1.78607	8.39668	-3.82042	0.003655	0.0339197	-1.99305
GLI3	-1.79023	6.25969	-3.83684	0.00356073	0.0334332	-1.96647
RDH12	-1.79868	6.54688	-4.65003	0.00102198	0.0169415	-0.691547
OGDH	-1.799	12.1742	-4.15383	0.00216535	0.0253725	-1.45945
ESRP1	-1.80272	6.64872	-3.70924	0.00436599	0.0372713	-2.17369
FAM83F	-1.80329	5.43203	-4.57397	0.00114404	0.0180352	-0.807046
SFMBT2	-1.80344	6.81422	-6.19956	0.000122769	0.00615261	1.47502
OSTalpha	-1.80537	5.67716	-5.263	0.000424417	0.0110372	0.208363
ZNF395	-1.81048	7.56204	-10.0039	2.24e-06	0.000786235	5.45005
DMRT2	-1.81112	4.75889	-8.65331	7.9e-06	0.00154908	4.22602
B4GALT1	-1.81954	11.3025	-5.8028	0.000204615	0.0079542	0.954303
LOC388630	-1.82342	5.9612	-3.54919	0.00565362	0.0433203	-2.43574
CHRNB2	-1.83157	9.13871	-3.61433	0.0050873	0.0406185	-2.32882
GNAL	-1.83829	7.67214	-3.98918	0.00279903	0.0293077	-1.72135
KCNV1	-1.84627	4.59057	-7.22992	3.58e-05	0.00354824	2.72338
CUX2	-1.85121	4.61975	-7.19702	3.71e-05	0.00359186	2.68574
CLIC3	-1.85227	5.87257	-6.01987	0.000154325	0.00693816	1.24203
APOL4	-1.85231	6.81896	-6.21192	0.000120872	0.0061217	1.49086
NGB	-1.86541	5.92013	-6.17839	0.000126095	0.0062513	1.4478
RAB38	-1.86931	5.6016	-4.54302	0.00119805	0.0184463	-0.85427
TRIM7	-1.87085	8.55309	-4.56667	0.00115654	0.0181487	-0.818172
PLEKHG4	-1.87471	6.82264	-4.66361	0.00100168	0.0167749	-0.671003
RAB27A	-1.87585	8.70102	-8.3048	1.12e-05	0.001886	3.87985
C10orf47	-1.87663	7.65209	-5.27676	0.000416388	0.0109303	0.227911
TNN	-1.88321	5.98072	-3.62605	0.00499186	0.0401977	-2.30962
BCAM	-1.88708	11.2667	-3.94192	0.00301507	0.0305157	-1.79712
SUSD4	-1.88983	8.04642	-4.23382	0.00191399	0.0235623	-1.33342
IL6R	-1.89226	7.61357	-5.44458	0.000330545	0.00979255	0.464158
KCNG3	-1.89339	5.3569	-4.30984	0.00170362	0.0221595	-1.21442
FAM162B	-1.89494	8.28982	-4.49247	0.00129222	0.0192732	-0.931709
HSPA2	-1.89597	9.55875	-4.29108	0.00175317	0.022516	-1.24373
RTN4RL1	-1.89892	9.11241	-6.80996	5.82e-05	0.00449537	2.23208
ZIC3	-1.90217	5.084	-6.11334	0.000136938	0.00650629	1.36382
FOSL2	-1.91787	6.87817	-6.49031	8.55e-05	0.00534122	1.84214
PLAC2	-1.91885	9.00491	-4.51149	0.0012559	0.0189265	-0.902529
TNAP	-1.92112	5.52095	-4.59508	0.00110867	0.0177461	-0.774898
PPARGC1A	-1.92726	6.41712	-4.56284	0.00116316	0.0181903	-0.824014
KLF5	-1.93113	7.74435	-4.08354	0.00241504	0.0269188	-1.57085
PAX6	-1.93497	7.05232	-3.61705	0.00506498	0.0405004	-2.32436
ENC1	-1.93669	10.3857	-5.36502	0.000368596	0.0103001	0.352683
TSPAN8	-1.94137	5.84584	-3.51981	0.00593019	0.0446781	-2.48408
LDLRAP1	-1.94897	6.55298	-4.59318	0.00111181	0.017788	-0.777797
GALNT5	-1.95	5.40249	-8.62686	8.11e-06	0.00156581	4.20021
ARHGDIG	-1.95001	6.64849	-4.8151	0.000802325	0.0149956	-0.443741
MYO16	-1.95053	4.77217	-5.69596	0.000235641	0.00842404	0.810127
TMPRSS3	-1.95631	5.96287	-4.43329	0.00141258	0.0202805	-1.02283
MST1P2	-1.95942	10.7885	-6.28663	0.000110056	0.00587121	1.58622
LINC00162	-1.9668	6.33107	-14.3485	8.69e-08	0.000136291	8.41154
NKX2-2	-1.96848	4.55425	-4.07174	0.00245985	0.0271848	-1.58961
ACTA1	-1.9711	7.31363	-7.84555	1.82e-05	0.00247263	3.40274
SLC16A12	-1.97255	5.4865	-3.7737	0.0039377	0.0353304	-2.0688
DDO	-1.97323	5.42429	-4.18598	0.00206037	0.0246759	-1.4087
RRBP1	-1.97344	10.4681	-6.15896	0.000129234	0.00632205	1.42278
TAC3	-1.97655	5.72391	-10.2125	1.87e-06	0.000732095	5.62388
PTGER1	-1.97714	6.09611	-3.64403	0.00484909	0.0396246	-2.28019
MSX2	-1.98318	4.30501	-10.0921	2.07e-06	0.00076501	5.52406
SLC38A2	-1.98918	9.387	-5.5063	0.000303941	0.0094758	0.549978
C20orf195	-1.99556	6.85895	-4.87523	0.00073535	0.0142348	-0.354466
GLT8D2	-1.99731	9.08816	-5.43816	0.000333452	0.00983238	0.4552
BCHE	-1.99767	6.16674	-4.43181	0.00141574	0.0203027	-1.02511
KIAA1661	-1.99767	6.95879	-7.18461	3.77e-05	0.00360463	2.6715
RELN	-1.99913	3.89516	-5.48952	0.000310939	0.00956706	0.526698
NTRK3	-2.00521	6.58845	-7.945	1.63e-05	0.0023496	3.50815
TUBB6	-2.01013	10.8296	-3.5951	0.00524803	0.0413838	-2.36034
CD79B	-2.01101	6.10462	-4.49855	0.0012805	0.0191438	-0.92238
KAZALD1	-2.01759	9.04213	-6.87639	5.38e-05	0.00428201	2.31135
BOK	-2.0193	7.06287	-3.75478	0.00405862	0.0358933	-2.09954
SEMA5A	-2.02	6.11257	-5.48036	0.000314828	0.00959434	0.513985
OLFM3	-2.02057	6.04989	-8.02148	1.51e-05	0.0022314	3.58841
P2RY1	-2.02248	5.63908	-4.42476	0.00143087	0.0203645	-1.03599
HES6	-2.02296	8.27941	-5.58206	0.000274395	0.00909449	0.654535
FXYD3	-2.02756	6.65859	-3.63748	0.00490058	0.0398385	-2.29091
SCNN1A	-2.02858	6.1846	-4.09862	0.00235901	0.0266213	-1.5469
ROPN1B	-2.02949	6.03952	-4.303	0.00172151	0.0222919	-1.22509
LOC645321	-2.03053	5.59688	-4.15296	0.00216824	0.0253748	-1.46082
CDKN2B	-2.03059	6.00082	-5.53317	0.000293086	0.00936232	0.587166
CORO2A	-2.03943	8.39725	-3.7554	0.00405464	0.0358834	-2.09855
KRT18P55	-2.04177	10.476	-4.55795	0.00117166	0.0182717	-0.831468
SPATA18	-2.04733	7.21683	-6.28592	0.000110153	0.00587121	1.58532
SLC6A15	-2.05198	4.25335	-4.00316	0.00273828	0.0289945	-1.69898
ITIH2	-2.05478	5.16762	-7.83692	1.83e-05	0.00247958	3.39354
CCBE1	-2.05848	4.89602	-3.9353	0.00304673	0.0306957	-1.80776
KCNB2	-2.0593	6.6269	-4.23123	0.00192162	0.0236155	-1.33748
SPTLC3	-2.06563	5.64105	-5.77847	0.000211272	0.0080549	0.921615
ZFP36L2	-2.07334	9.16103	-4.25898	0.00184147	0.0230835	-1.29395
TRIM29	-2.09005	5.37346	-5.63792	0.000254596	0.00874127	0.73108
ST18	-2.09634	8.40517	-4.96076	0.000650179	0.0134675	-0.22839
CCDC48	-2.09886	8.0575	-6.17081	0.00012731	0.00628695	1.43805
KCNMB4	-2.10148	8.77239	-4.36077	0.0015765	0.0214116	-1.13512
NFIL3	-2.1024	9.94009	-4.29709	0.00173713	0.0224173	-1.23433
ROPN1	-2.10438	6.28157	-5.25874	0.000426936	0.011075	0.202306
FRMD4A	-2.10529	4.99974	-3.83319	0.00358151	0.0335004	-1.97239
NSF	-2.10576	8.66136	-6.48946	8.56e-05	0.00534122	1.84108
CSGALNACT1	-2.10854	8.6438	-4.23097	0.0019224	0.0236174	-1.3379
MLPH	-2.11236	7.51573	-3.43023	0.00686372	0.0488707	-2.63184
LOC572558	-2.11885	5.86012	-5.10153	0.00053217	0.0120923	-0.0232758
TMEM45B	-2.12697	7.21157	-3.50304	0.00609437	0.0455203	-2.5117
LOC645249	-2.12869	5.40081	-3.80625	0.00373845	0.0343284	-2.01601
TFEB	-2.12906	8.78495	-4.52603	0.00122888	0.0186915	-0.880271
DHRS3	-2.13004	10.3058	-3.89213	0.00326178	0.031706	-1.87722
HIP1R	-2.13098	11.9149	-9.03248	5.46e-06	0.00124649	4.58789
SOHLH1	-2.13438	4.98778	-5.43768	0.000333668	0.00983238	0.454536
GAFA3	-2.13825	5.13104	-10.6108	1.33e-06	0.000601081	5.94537
IMPA2	-2.14714	9.66508	-4.26332	0.00182926	0.0230012	-1.28715
SLC44A3	-2.1477	8.66348	-5.989	0.000160578	0.00704286	1.20155
GLI2	-2.15159	5.42448	-5.53898	0.000290795	0.00935267	0.595187
GATM	-2.15263	9.70786	-5.34534	0.000378715	0.0104327	0.324971
FLJ37644	-2.15323	6.07603	-4.87915	0.000731193	0.0142195	-0.34866
TUBA3D	-2.15493	9.02101	-6.6395	7.14e-05	0.00498248	2.02589
C15orf27	-2.15641	7.41888	-3.62459	0.0050037	0.0402585	-2.31202
MPP7	-2.15899	7.06594	-4.62567	0.00105949	0.0173101	-0.728449
SDK2	-2.15979	5.41381	-3.59609	0.00523963	0.0413496	-2.35872
OR7A5	-2.16317	4.56512	-5.46979	0.000319387	0.00964391	0.499282
CDR2L	-2.16593	8.35976	-6.22822	0.000118417	0.00603867	1.51174
BUB3	-2.17307	9.9729	-3.88495	0.00329908	0.0319466	-1.8888
RBFOX3	-2.17501	5.64423	-10.8694	1.07e-06	0.000546292	6.14715
PPP1R14C	-2.17823	5.54827	-6.61626	7.34e-05	0.00504005	1.99747
LRRC8E	-2.19126	4.918	-4.8762	0.000734317	0.0142319	-0.353026
FAM19A2	-2.20482	6.39911	-3.73953	0.00415893	0.0363532	-2.12435
HSPB9	-2.20763	6.53157	-11.008	9.6e-07	0.000523287	6.25308
PLK5	-2.20893	5.53337	-3.43494	0.006811	0.0486739	-2.62406
KRT23	-2.21202	6.61712	-4.80998	0.000808317	0.0150589	-0.451362
GADD45B	-2.22839	10.8921	-4.31984	0.00167784	0.021999	-1.19883
RFPL3-AS1	-2.23719	7.62707	-3.84261	0.00352825	0.0333295	-1.95715
LRRC10B	-2.24081	7.26561	-4.03672	0.00259812	0.0281322	-1.6454
LY6K	-2.24214	5.83158	-5.88402	0.000183982	0.0075171	1.06278
CLDN23	-2.25381	5.71822	-3.8	0.00377585	0.0345202	-2.02613
SNCAIP	-2.25477	5.95185	-3.8417	0.00353333	0.0333331	-1.95861
ITPR3	-2.2682	6.87878	-3.64025	0.0048787	0.0397802	-2.28637
CBLN1	-2.2704	6.22194	-4.66585	0.000998373	0.0167465	-0.667615
SCT	-2.27355	6.38758	-7.85018	1.81e-05	0.00247263	3.40768
OSBPL3	-2.28876	8.39377	-6.45918	8.89e-05	0.00542137	1.80341
EZR	-2.29043	8.02766	-7.77138	1.97e-05	0.0025859	3.32336
SOX5	-2.29056	6.66866	-6.90831	5.18e-05	0.00422821	2.34924
FOXQ1	-2.29451	6.60288	-5.8166	0.000200941	0.00790621	0.972801
BTNL2	-2.29829	7.77544	-7.96641	1.6e-05	0.00231911	3.53069
HSPA1A	-2.30165	11.7926	-6.43781	9.12e-05	0.00545523	1.77674
LRRC36	-2.30566	7.22171	-4.42531	0.00142969	0.0203645	-1.03514
SALL1	-2.30981	5.99067	-4.09441	0.00237451	0.0267036	-1.55358
TCF7	-2.31383	6.82923	-5.18461	0.000473469	0.0115393	0.0963986
UGT2A1	-2.31531	7.51653	-3.60157	0.00519339	0.0411512	-2.34974
CABYR	-2.31604	7.99771	-4.92969	0.000679829	0.013739	-0.274062
RDH10	-2.32351	6.78093	-7.97877	1.58e-05	0.00230548	3.54367
ROBO2	-2.331	4.38485	-4.99229	0.000621505	0.0131611	-0.182195
ETV1	-2.3361	6.08846	-4.90725	0.000702145	0.0139429	-0.307141
PTPRZ1	-2.34054	6.46842	-5.78021	0.000210788	0.00804678	0.923957
CCDC88C	-2.34464	7.32997	-3.60659	0.00515141	0.0409393	-2.34151
PDLIM3	-2.34493	9.06148	-4.0961	0.00236827	0.0266686	-1.5509
MITF	-2.3472	8.61187	-3.8423	0.00352998	0.0333295	-1.95765
LIMS3-LOC440895	-2.35291	6.81286	-4.79275	0.00082886	0.0152668	-0.477065
TSPAN19	-2.35409	5.83121	-5.42958	0.00033738	0.00989527	0.443219
EMP2	-2.36485	9.79851	-4.29159	0.0017518	0.022506	-1.24293
ADRA2C	-2.37033	9.78279	-4.06282	0.0024943	0.0274573	-1.6038
IRAK3	-2.37218	6.36783	-12.2358	3.71e-07	0.00031734	7.12942
TLE3	-2.3745	5.60922	-6.49279	8.53e-05	0.00534122	1.84522
FAM49A	-2.37567	7.73004	-6.50821	8.37e-05	0.00534122	1.86435
SLC14A2	-2.37979	6.52431	-6.54852	7.97e-05	0.00526953	1.91421
ZIC1	-2.38069	4.59766	-4.78804	0.000834566	0.0153268	-0.484091
PDE11A	-2.38079	7.71226	-7.39819	2.96e-05	0.00323711	2.91378
IGFBP5	-2.38572	10.6639	-3.93854	0.00303119	0.0306193	-1.80255
KRT85	-2.39655	7.82871	-3.52607	0.00587013	0.0443934	-2.47378
OR6K2	-2.39657	5.93215	-6.30942	0.000106969	0.00583299	1.61515
SCIN	-2.39839	5.97806	-5.13016	0.000511102	0.0118998	0.0180874
OXT	-2.40448	8.3836	-11.275	7.74e-07	0.000470063	6.45297
CAMK1D	-2.40487	8.55397	-5.40641	0.000348242	0.0100493	0.410804
C9orf150	-2.40879	6.51061	-3.87102	0.00337269	0.0323258	-1.91126
ALDH1L2	-2.40926	7.51296	-4.53205	0.00121786	0.018584	-0.871056
KCNMB2	-2.4097	5.13619	-4.49752	0.00128248	0.0191659	-0.923963
FLJ43390	-2.41078	9.59169	-4.78206	0.000841879	0.0153861	-0.493026
VDR	-2.42252	8.85853	-6.43091	9.2e-05	0.00545523	1.76811
KRT18	-2.42371	10.1817	-5.30227	0.000401926	0.0107791	0.264095
ZNF750	-2.4421	6.03821	-3.74163	0.00414499	0.0362988	-2.12094
KCNE1	-2.44602	5.6282	-3.5058	0.006067	0.0453879	-2.50715
CCNJL	-2.44656	7.11772	-5.41874	0.000342416	0.00996529	0.428062
GUCY2F	-2.45163	4.94021	-3.54101	0.00572929	0.043681	-2.4492
KCNK10	-2.45203	5.2429	-4.88405	0.000726038	0.0142	-0.341414
FAM3B	-2.45646	7.24469	-4.53959	0.00120422	0.0184771	-0.859527
NKAIN1	-2.45823	6.97781	-3.66936	0.00465506	0.0387707	-2.23877
SLC1A1	-2.45995	8.83985	-9.51989	3.46e-06	0.000986497	5.03171
SEMA3B	-2.46083	8.95469	-4.61185	0.0010814	0.0174957	-0.749409
CLDN11	-2.47255	6.56692	-3.81361	0.00369482	0.0340789	-2.00407
FAM196A	-2.47786	4.60355	-9.66586	3.03e-06	0.000917349	5.16016
PIP5K1B	-2.47871	6.57589	-4.26725	0.00181828	0.0229295	-1.28099
SLC39A8	-2.47922	10.134	-6.20773	0.000121511	0.00613221	1.4855
FBXO17	-2.47932	11.5877	-4.25333	0.00185752	0.0232066	-1.30282
TMEM158	-2.49383	8.36849	-4.16265	0.00213597	0.0251727	-1.4455
SULF2	-2.49469	10.8931	-4.21204	0.00197923	0.0240563	-1.36766
TES	-2.50103	7.95233	-3.54632	0.00568004	0.0434519	-2.44046
CHRDL1	-2.50654	5.55985	-3.98771	0.00280552	0.0293499	-1.72371
RNF212	-2.50762	5.71888	-3.54934	0.0056523	0.0433203	-2.4355
PPP1R3B	-2.50934	7.99175	-5.04573	0.000575945	0.0126298	-0.104227
RBP7	-2.5129	9.29029	-6.40971	9.45e-05	0.00552742	1.74157
SFTPC	-2.52242	7.97767	-3.62799	0.00497624	0.0401492	-2.30644
COL9A2	-2.53456	9.55852	-5.31966	0.000392375	0.0106607	0.288707
LOC150568	-2.53457	5.4639	-9.97415	2.3e-06	0.000786773	5.42497
KCTD19	-2.53684	6.69862	-5.25612	0.000428498	0.0110806	0.198566
GAS1	-2.53775	7.62512	-3.9183	0.00312958	0.0311716	-1.83509
LECT1	-2.53881	6.50769	-4.74299	0.000891348	0.0158148	-0.551501
RET	-2.55038	5.72404	-3.48386	0.00628792	0.0462475	-2.54332
GAD2	-2.56302	5.1009	-4.09598	0.00236873	0.0266686	-1.5511
EGFL6	-2.56362	5.66146	-3.76442	0.00399653	0.0355613	-2.08388
VAV2	-2.56694	6.72556	-4.42185	0.00143718	0.0204279	-1.04049
PDGFRL	-2.57496	8.39324	-8.93287	6.01e-06	0.001337	4.49427
LGALSL	-2.58374	10.5812	-5.60085	0.000267555	0.00897334	0.68034
MGC24103	-2.584	6.69876	-4.33663	0.00163547	0.0217005	-1.17268
TMEM63B	-2.58474	8.99472	-6.84596	5.58e-05	0.00434668	2.27512
DIRC1	-2.59464	10.2944	-3.59788	0.00522447	0.0413192	-2.35578
RPRML	-2.59555	5.64057	-4.31799	0.00168257	0.0220303	-1.20171
BRSK2	-2.59914	9.17106	-3.45974	0.00654039	0.0474484	-2.5831
MOCOS	-2.60099	5.90652	-7.50223	2.64e-05	0.00303404	3.0297
CHIA	-2.60251	6.58102	-4.84856	0.000764287	0.0145975	-0.393997
RFX4	-2.60653	5.82534	-4.62427	0.00106169	0.0173101	-0.730569
TSPAN12	-2.60957	6.27986	-3.71643	0.00431589	0.0370116	-2.16198
LOC100507008	-2.61442	7.17823	-4.40298	0.00147877	0.0207595	-1.06968
DDX43	-2.61715	5.57552	-4.17991	0.00207977	0.0248134	-1.41827
PTPRE	-2.62901	9.55141	-5.06849	0.000557637	0.0123513	-0.071145
PRLR	-2.63686	5.75933	-6.33578	0.000103515	0.00579651	1.64851
METTL7A	-2.64109	9.09532	-7.69547	2.13e-05	0.0027493	3.24145
CSDA	-2.64558	9.62342	-4.58134	0.00113155	0.0179617	-0.795808
ENPP1	-2.64753	8.62764	-5.07996	0.000548655	0.0122779	-0.0545162
PTPRK	-2.64908	9.59648	-4.5491	0.00118724	0.0184078	-0.844987
NMU	-2.64948	6.66654	-4.5359	0.00121086	0.0185088	-0.865157
KRT40	-2.6552	5.25354	-10.4015	1.59e-06	0.000673102	5.77808
IGFBP6	-2.66509	9.78805	-4.84223	0.000771334	0.0147038	-0.403397
FST	-2.66588	6.68038	-4.45805	0.00136085	0.0198176	-0.984654
TMEM163	-2.67125	6.30053	-5.7847	0.000209545	0.00804098	0.929997
TGFB2	-2.67519	6.63385	-3.90962	0.00317276	0.0313856	-1.84904
CPNE6	-2.68089	10.7187	-3.76594	0.00398688	0.0355243	-2.08142
GPRC5B	-2.68463	10.1645	-6.60048	7.48e-05	0.00506324	1.97813
GPM6B	-2.68551	7.78242	-4.17017	0.00211127	0.0250227	-1.43363
SLC4A4	-2.69374	5.90579	-4.63232	0.00104911	0.0172167	-0.718364
PKIA	-2.70786	11.0093	-3.42371	0.00693737	0.0492463	-2.64262
LIN7A	-2.71254	7.59655	-3.64465	0.00484424	0.0396022	-2.27918
ARPP21	-2.72264	4.97717	-7.06367	4.33e-05	0.00385606	2.53169
WNT5A	-2.72693	5.89823	-5.49842	0.000307205	0.00954925	0.539053
TFPI2	-2.73952	6.81315	-4.94393	0.000666065	0.0136155	-0.253112
DSCAM	-2.7406	8.62559	-10.0653	2.12e-06	0.000768084	5.50166
SDK1	-2.7552	7.59539	-6.22494	0.000118907	0.00604708	1.50754
RTN4R	-2.75944	6.8022	-7.83308	1.84e-05	0.00248087	3.38945
DUSP2	-2.76401	7.72257	-4.08707	0.00240178	0.0268505	-1.56523
PPAPDC3	-2.77069	8.75013	-4.94959	0.000660684	0.0135781	-0.244804
GADD45G	-2.7805	7.9256	-4.53323	0.00121572	0.0185588	-0.869249
FZD7	-2.78113	7.53507	-3.83502	0.00357105	0.0334692	-1.96942
PAPLN	-2.78251	7.63379	-4.47517	0.00132623	0.019492	-0.958293
ZFP36L1	-2.78633	11.2579	-3.41243	0.00706669	0.0497508	-2.66126
CHRNE	-2.78833	6.71826	-4.5838	0.00112742	0.0179354	-0.792067
KCNJ3	-2.79684	8.81872	-3.5283	0.00584889	0.0443009	-2.47011
FAT1	-2.79797	7.73709	-4.15101	0.00217481	0.0254107	-1.46391
SCARA5	-2.80525	7.49515	-3.42721	0.00689771	0.0490501	-2.63683
DOCK11	-2.81528	8.18048	-7.49626	2.65e-05	0.00304441	3.02309
CDH19	-2.81894	5.11283	-6.80883	5.83e-05	0.00449537	2.23073
PI16	-2.82218	7.46147	-6.09865	0.000139524	0.00658757	1.34476
MYO15A	-2.82592	9.63858	-4.48858	0.00129979	0.0193192	-0.937687
NTNG1	-2.83295	6.03894	-4.91309	0.000696262	0.0138994	-0.298524
FAM59A	-2.83358	8.95012	-6.30764	0.000107206	0.00583299	1.61289
ATP6V1C2	-2.83606	5.82123	-5.44553	0.000330115	0.00979255	0.465489
IER2	-2.83731	12.5473	-4.69658	0.000954191	0.0163731	-0.621267
GNAS	-2.84748	5.53169	-6.60058	7.48e-05	0.00506324	1.97826
CDH22	-2.84998	5.83494	-4.48141	0.00131386	0.0193833	-0.948702
ESPN	-2.8719	7.19224	-8.72517	7.36e-06	0.00148154	4.29576
PDIA2	-2.87941	7.38245	-5.80282	0.00020461	0.0079542	0.95433
PTPN14	-2.88204	6.34178	-5.2167	0.00045269	0.0113565	0.142344
ASCL1	-2.88824	6.39058	-6.76477	6.14e-05	0.00459374	2.17781
HS3ST1	-2.89092	8.32032	-4.83072	0.000784327	0.0148015	-0.420506
BCL2	-2.89413	7.65611	-6.49123	8.54e-05	0.00534122	1.84328
CPAMD8	-2.89602	8.53735	-5.28623	0.000410955	0.010874	0.241355
BNC2	-2.89785	5.27578	-3.69562	0.00446257	0.0377957	-2.19591
SAMD5	-2.90155	8.96279	-6.51565	8.29e-05	0.00533555	1.87357
NKAIN2	-2.90208	5.43242	-10.522	1.43e-06	0.000620243	5.87487
COL11A1	-2.90584	8.91968	-6.08293	0.00014235	0.00662189	1.32433
PPFIA2	-2.94086	6.3513	-10.1498	1.97e-06	0.000757215	5.57204
DUSP1	-2.95185	11.7242	-5.6585	0.000247694	0.00860638	0.759165
F12	-2.9604	7.76821	-9.1054	5.1e-06	0.00119856	4.65579
FLJ30901	-2.96311	6.79873	-6.37212	9.89e-05	0.00567598	1.69435
SCGB2A1	-2.96832	7.00386	-5.38394	0.000359137	0.010169	0.379285
SOX11	-2.97066	5.31938	-5.14162	0.000502927	0.0118579	0.0345982
NPY	-2.99933	5.73554	-5.53512	0.000292314	0.0093531	0.589862
HES5	-3.00426	7.66453	-4.91112	0.000698241	0.0139241	-0.301431
KIAA1199	-3.00467	7.52715	-6.15714	0.000129532	0.00632205	1.42043
ADH1A	-3.00991	6.55597	-3.57991	0.00537876	0.0420168	-2.38527
TBX19	-3.01057	12.1457	-3.90416	0.00320026	0.0314998	-1.85783
TRPC3	-3.02896	10.498	-4.08979	0.00239164	0.0267976	-1.56092
ALDH1A3	-3.03972	6.66858	-3.64518	0.00484008	0.0395847	-2.27831
NR4A3	-3.07014	5.76059	-4.77076	0.000855876	0.0154914	-0.509912
CBS	-3.07702	8.74953	-4.44921	0.00137908	0.0199519	-0.998273
ASTL	-3.08353	8.1716	-3.49301	0.00619478	0.0459363	-2.52823
LOC100507218	-3.08425	6.57538	-4.23452	0.00191193	0.0235502	-1.33232
RIPK4	-3.09352	7.69339	-3.79133	0.00382846	0.0348235	-2.0402
SLC45A3	-3.09928	7.48442	-6.36996	9.92e-05	0.00568252	1.69164
KCNN2	-3.11067	8.72472	-4.51611	0.00124726	0.0188567	-0.895462
NPAS4	-3.11154	5.28546	-5.44283	0.000331335	0.00979431	0.461714
SSTR2	-3.11555	9.21637	-3.41432	0.0070449	0.0496628	-2.65815
DFNA5	-3.15069	7.72868	-5.03935	0.000581194	0.0126894	-0.113517
LOC100506388	-3.15367	6.88974	-4.9054	0.000704023	0.0139706	-0.309877
CEL	-3.15504	6.53841	-6.64635	7.08e-05	0.0049752	2.03425
ZNF521	-3.15968	8.26198	-5.89525	0.000181311	0.00745766	1.0777
SLIT2	-3.16718	6.63207	-4.69769	0.000952621	0.0163611	-0.619581
FGF14	-3.17074	5.85748	-10.7984	1.14e-06	0.000566705	6.09227
PGAM2	-3.18347	6.70603	-11.5971	6.02e-07	0.000429501	6.68703
MPPED1	-3.18544	6.61483	-7.71448	2.09e-05	0.0027212	3.26203
CH25H	-3.20208	7.1719	-3.91435	0.00314915	0.0312434	-1.84144
CISH	-3.20866	7.39666	-6.32097	0.000105439	0.00583018	1.62978
FMN1	-3.21113	7.08313	-7.44579	2.81e-05	0.00314383	2.96699
PTPRD	-3.21649	6.98685	-4.07447	0.00244941	0.0271172	-1.58527
CELSR1	-3.22465	6.63679	-4.63168	0.0010501	0.0172252	-0.719333
DNASE1	-3.24436	7.26799	-10.1254	2.01e-06	0.000758006	5.55176
YPEL4	-3.26492	8.95188	-4.40643	0.00147108	0.0207096	-1.06434
KLK11	-3.2713	7.33882	-5.57927	0.000275424	0.00909449	0.650709
C6orf118	-3.27595	6.41294	-15.1877	5.15e-08	8.81e-05	8.8542
C1QTNF4	-3.28581	8.80777	-9.32136	4.16e-06	0.00112567	4.85375
SATB1	-3.30208	9.04095	-4.32819	0.00165662	0.0218349	-1.18582
RSPO3	-3.30348	7.21037	-5.11813	0.000519845	0.011979	0.000718663
BMP7	-3.30986	6.38098	-4.9398	0.000670033	0.0136548	-0.259195
LINC00239	-3.31417	5.79477	-16.432	2.49e-08	6.12e-05	9.45154
BTG2	-3.32037	12.9205	-8.32347	1.1e-05	0.00188398	3.89873
CCNO	-3.32819	7.5272	-5.13414	0.000508245	0.0118898	0.0238276
CTXN3	-3.33986	5.76505	-11.834	5.02e-07	0.000393166	6.85443
ALK	-3.3448	5.66572	-12.4434	3.19e-07	0.000285517	7.26726
LGR6	-3.3484	6.80904	-3.75211	0.00407602	0.0359795	-2.10389
FOXP2	-3.36555	6.65532	-9.08505	5.2e-06	0.00121311	4.6369
VIT	-3.36814	5.91112	-5.40842	0.000347284	0.0100437	0.41362
TMEM45A	-3.37175	7.75983	-5.81246	0.000202034	0.00791192	0.967261
TMEM229A	-3.3741	6.58369	-3.84217	0.00353073	0.0333295	-1.95786
ATF3	-3.38285	8.66517	-3.53313	0.00580307	0.0440706	-2.46215
SOX3	-3.39885	10.2439	-3.49626	0.00616203	0.0457842	-2.52287
SORBS2	-3.40165	9.62047	-4.48739	0.00130212	0.0193213	-0.939516
ANGPT1	-3.40251	7.0952	-6.29753	0.000108567	0.00586138	1.60007
IL22RA1	-3.4089	5.13947	-8.47004	9.49e-06	0.0017363	4.04565
KDELR3	-3.43459	6.78473	-7.58265	2.41e-05	0.00288375	3.11838
ENPP6	-3.44199	5.39141	-8.33755	1.09e-05	0.00187413	3.91295
NFIX	-3.44962	9.99893	-4.02781	0.00263457	0.0283337	-1.6596
AFF2	-3.46214	4.64812	-9.97897	2.29e-06	0.000786773	5.42905
SLCO5A1	-3.47711	4.45936	-8.60568	8.29e-06	0.00157855	4.17949
LOC339240	-3.47943	7.97954	-12.4873	3.09e-07	0.000285517	7.29605
SAMD11	-3.49148	11.1314	-4.08588	0.00240626	0.0268767	-1.56714
GNG8	-3.50134	7.1469	-16.3534	2.6e-08	6.12e-05	9.41569
CR2	-3.50837	8.86668	-10.7924	1.14e-06	0.000566705	6.08761
ESPNL	-3.50877	8.37171	-6.8546	5.52e-05	0.00432927	2.28542
RASD1	-3.51089	14.4071	-3.50681	0.00605708	0.0453547	-2.50549
STYK1	-3.51255	6.257	-4.6476	0.00102565	0.0169799	-0.695215
FIGF	-3.51456	7.15837	-8.14322	1.33e-05	0.00204534	3.71476
SGCD	-3.53834	5.76968	-6.04335	0.000149744	0.00683013	1.27274
TLN2	-3.56402	9.11927	-13.1795	1.89e-07	0.000209254	7.73426
CACNA1B	-3.60367	8.97079	-4.94982	0.000660465	0.0135781	-0.244466
NOV	-3.60807	7.97903	-5.87749	0.000185555	0.00753715	1.0541
C8orf84	-3.61518	6.64652	-4.77576	0.000849651	0.0154307	-0.502438
MET	-3.64233	8.06078	-3.8257	0.00362441	0.033759	-1.9845
RPRM	-3.64391	5.93653	-8.15787	1.31e-05	0.00203954	3.72985
SMR3B	-3.65009	5.2179	-13.898	1.16e-07	0.000147966	8.15936
PDLIM4	-3.67389	9.50644	-6.13596	0.000133058	0.00640771	1.39309
GLDC	-3.69879	5.8022	-5.9235	0.000174774	0.00734833	1.11516
SYT13	-3.70893	10.4474	-4.50261	0.00127273	0.0190656	-0.916154
LINC00473	-3.72465	7.67851	-3.95727	0.00294302	0.0300695	-1.77247
FAM135B	-3.72979	5.60598	-5.877	0.000185675	0.00753715	1.05344
SEMA3A	-3.73417	6.71947	-4.57618	0.00114027	0.018006	-0.803668
PTCHD1	-3.73778	7.52638	-3.96741	0.00289647	0.0298533	-1.75623
KRTAP2-4	-3.75425	12.6193	-5.32439	0.00038982	0.0106411	0.295392
NBL1	-3.75872	7.95442	-5.78601	0.000209182	0.00804098	0.931765
ZMAT4	-3.78225	7.876	-5.18413	0.00047379	0.0115396	0.0957042
RGS16	-3.80003	10.3437	-4.54785	0.00118945	0.0184188	-0.846896
PMAIP1	-3.81584	5.65811	-4.2648	0.00182512	0.022985	-1.28483
GNRHR	-3.8226	7.22228	-4.83835	0.000775688	0.0147328	-0.409162
ID1	-3.85356	11.2536	-4.30524	0.00171564	0.0222619	-1.22161
CLIC5	-3.85612	8.17815	-9.60818	3.19e-06	0.000945881	5.10964
PYCR1	-3.89211	9.72184	-9.26986	4.36e-06	0.00113811	4.80696
TTC39C	-3.89518	10.0376	-6.81277	5.8e-05	0.00449537	2.23545
PPP1R13L	-3.90881	8.91387	-9.68106	2.99e-06	0.000917349	5.17342
CALB1	-3.91402	9.11313	-8.33775	1.09e-05	0.00187413	3.91315
ALDOB	-3.93118	6.98412	-6.27401	0.000111807	0.0058815	1.57017
MNX1	-3.94307	5.75311	-3.99655	0.00276684	0.0291162	-1.70956
ID4	-3.94769	8.51069	-4.75712	0.000873114	0.0156454	-0.530334
THBS2	-3.95747	5.3954	-3.8964	0.00323979	0.0316329	-1.87033
SOX2	-3.9901	8.38634	-3.89906	0.0032262	0.0316214	-1.86605
KRT81	-3.99489	11.4314	-8.88027	6.33e-06	0.00136442	4.44443
SNTG2	-3.99732	6.19223	-4.34799	0.00160742	0.0215487	-1.15499
OTOS	-4.01271	8.69457	-11.2469	7.92e-07	0.000473052	6.43219
COMP	-4.07724	9.71526	-7.27252	3.41e-05	0.00351023	2.77193
THBS4	-4.1232	11.3908	-7.24357	3.52e-05	0.00351519	2.73896
TDRD9	-4.15259	9.24279	-6.52508	8.2e-05	0.00532049	1.88524
FGFR3	-4.17789	9.91356	-5.10533	0.00052932	0.012079	-0.0177759
HES1	-4.19211	9.53719	-7.97565	1.58e-05	0.00230548	3.5404
GPHA2	-4.21816	6.90939	-4.27024	0.00180998	0.0228761	-1.27632
TTN	-4.23332	6.88902	-5.39877	0.000351905	0.0100581	0.400098
TTR	-4.23492	5.88608	-4.34535	0.0016139	0.0215741	-1.1591
BBOX1	-4.23639	5.69072	-5.71743	0.000229021	0.00829945	0.839237
CHDH	-4.24644	7.1153	-9.36415	4e-06	0.00108952	4.89243
TNNC1	-4.24878	6.78181	-10.3855	1.61e-06	0.000673102	5.76519
NRAP	-4.25616	5.15637	-14.2129	9.48e-08	0.000142744	8.33675
EFCAB1	-4.3171	6.26651	-5.93138	0.000172998	0.0073063	1.12558
NDNF	-4.34117	7.40473	-8.78085	6.97e-06	0.00142559	4.34942
CT45A1	-4.35262	6.03375	-11.0927	8.96e-07	0.000507376	6.31709
PKIB	-4.35592	6.81316	-6.46108	8.87e-05	0.00542137	1.80577
PPP1R17	-4.3787	5.83336	-5.62881	0.000257714	0.00879185	0.718638
MFSD6L	-4.40379	7.05984	-8.87726	6.35e-06	0.00136442	4.44157
GHRHR	-4.40953	8.32725	-5.38625	0.000358001	0.0101595	0.382527
SLIT1	-4.41166	4.84797	-10.646	1.29e-06	0.000593083	5.97314
CCK	-4.41861	9.22232	-4.77849	0.000846275	0.015414	-0.498359
BHLHE22	-4.49476	6.43852	-7.41405	2.91e-05	0.00320841	2.93154
LOC100505806	-4.52456	7.56251	-7.18271	3.77e-05	0.00360463	2.66931
WFDC10B	-4.53199	10.8105	-12.457	3.16e-07	0.000285517	7.27621
FOS	-4.54246	11.3092	-3.43715	0.00678642	0.0485949	-2.6204
NR4A1	-4.56773	11.6634	-4.36286	0.0015715	0.0213996	-1.13188
SPON1	-4.59478	7.37859	-6.18727	0.000124688	0.00620829	1.45923
FGF9	-4.65278	7.19036	-3.58528	0.00533215	0.0418105	-2.37645
BCAT1	-4.65283	7.76856	-8.24357	1.2e-05	0.00194774	3.81764
OGN	-4.65285	7.39847	-3.72341	0.00426784	0.036867	-2.1506
ARC	-4.66142	7.75462	-7.66123	2.21e-05	0.00279608	3.20426
HTR4	-4.70563	5.82829	-13.5716	1.45e-07	0.000170168	7.9698
CNTN2	-4.70804	8.12278	-6.9495	4.94e-05	0.00412582	2.39792
FCN2	-4.80458	6.38495	-4.99251	0.000621311	0.0131611	-0.181876
NEUROD4	-4.85568	6.70788	-4.54373	0.00119678	0.0184461	-0.853186
PTGDS	-4.90108	10.8642	-6.13984	0.000132405	0.00640411	1.3981
MGC16121	-4.90625	9.59493	-6.01029	0.000156236	0.00697391	1.22949
CRLF1	-4.96788	9.57551	-8.31184	1.11e-05	0.00188589	3.88697
PCK1	-5.00351	6.11801	-13.9956	1.09e-07	0.000146776	8.2149
CDKN2A	-5.02884	7.42476	-11.2059	8.18e-07	0.00047546	6.40173
KLK12	-5.08277	5.99493	-22.7742	1.18e-09	7.39e-06	11.6793
WIF1	-5.19261	5.97567	-3.8972	0.00323571	0.0316214	-1.86905
NR4A2	-5.35581	7.04621	-5.72538	0.000226622	0.00826476	0.849991
PCDHB13	-5.3771	11.4203	-18.417	8.62e-09	2.7e-05	10.2789
SFRP2	-5.48091	7.9972	-3.46	0.00653761	0.0474373	-2.58267
HEPACAM2	-5.53932	6.06998	-9.4388	3.73e-06	0.00103273	4.95948
LOC150622	-5.66541	5.98324	-18.0155	1.06e-08	3.06e-05	10.1228
PLCXD3	-5.68159	6.54934	-16.4671	2.44e-08	6.12e-05	9.46743
COL6A6	-5.73683	5.55736	-10.3377	1.68e-06	0.000693457	5.7264
NEFL	-5.83077	8.67985	-10.7039	1.23e-06	0.000579266	6.01866
NEFM	-5.94136	12.0667	-12.1974	3.82e-07	0.000319242	7.10358
MEG3	-6.01057	9.13027	-6.24407	0.000116083	0.0059638	1.53199
LOC100292909	-6.01064	8.13797	-6.26248	0.000113432	0.00591198	1.55549
NTS	-6.02468	6.64014	-24.9337	5.02e-10	3.78e-06	12.2139
LHB	-6.87295	11.5577	-14.1096	1.01e-07	0.000143355	8.27913
POMC	-7.01393	13.4887	-3.81653	0.00367767	0.034011	-1.99934
CGA	-7.01401	11.195	-4.30803	0.00170834	0.0221977	-1.21724
ARHGAP36	-7.18059	10.4242	-4.37724	0.00153757	0.021236	-1.10956
CNR1	-7.23993	8.16431	-9.53184	3.42e-06	0.000986497	5.0423
CGB	-7.52342	9.67999	-11.7944	5.17e-07	0.000396972	6.82667
POU1F1	-7.60048	7.77191	-9.75109	2.81e-06	0.000879678	5.23424
TSHB	-7.74505	10.0193	-3.91348	0.00315348	0.0312539	-1.84284
GAL	-8.53152	9.56556	-13.8783	1.18e-07	0.000147966	8.14807
DLK1	-9.47823	9.41652	-11.7082	5.52e-07	0.000407418	6.76601
GH2	-10.9653	7.87499	-31.5414	5.43e-11	1.02e-06	13.4119
CSHL1	-11.4122	8.55008	-29.7311	9.51e-11	1.19e-06	13.1368
GH1	-11.4428	10.1374	-20.0939	3.82e-09	1.6e-05	10.8772
CSH1	-11.5403	9.4496	-19.3353	5.47e-09	1.87e-05	10.6169
CSH2	-11.5752	9.58672	-21.9554	1.66e-09	8.94e-06	11.4521
LogFC = log2(Fold change). LogFC >= 1: upregaled DEG. LogFC <= -1: downregulated DEGs.
