# Supplementary material for: Quantitative Analysis of Proteome in Non-functional Pituitary Adenomas: Clinical Relevance and Potential Benefits for the Patients
Source: Front Endocrinol (Lausanne). 2019 Dec 5;10:854. doi: 10.3389/fendo.2019.00854 (PMC6915109; doi:10.3389/fendo.2019.00854)
Supplement: Supplementary file 4 [file Table_4.xls]

## Sheet: Sheet 1
Supplemental Table 4. 2751 DEGs between invasive NFPAs and controls
DEG name	logFC	AveExpr	t	p-value	Adjusted p-value	B
XIST	8.94463	7.79105	11.0969	8.93e-07	0.000308297	6.35835
NEB	6.2187	7.46785	9.67116	3.01e-06	0.000601482	5.16836
SSTR1	6.03881	7.51223	8.13546	1.34e-05	0.00129167	3.67648
CXCL13	6.03161	7.87129	5.52885	0.000294802	0.00634272	0.503713
ALPK2	5.92237	6.54758	20.2968	3.48e-09	7.99e-06	11.2351
PTH	5.81752	5.95606	15.326	4.74e-08	5.41e-05	9.0756
IGSF21	5.73848	10.6554	6.00605	0.00015709	0.00455065	1.15399
GZMK	5.6732	8.42806	6.76654	6.13e-05	0.00276123	2.12308
CACNA2D4	5.49672	9.12831	4.98952	0.000623965	0.0096824	-0.271589
GRIK1	5.48493	6.5543	12.0176	4.37e-07	0.000192781	7.04309
C15orf48	5.16993	6.45394	6.8969	5.25e-05	0.00254787	2.28122
NEUROD2	5.01336	5.99285	3.28075	0.00877571	0.0461795	-2.9849
CALB1	5.00032	9.11313	9.96387	2.32e-06	0.000532519	5.42673
PROM1	4.90298	5.62594	8.4517	9.67e-06	0.00107653	4.00376
RASSF6	4.8725	6.20918	11.0286	9.44e-07	0.000319908	6.30508
LOC100505912	4.80652	7.12502	5.94748	0.000169425	0.00474718	1.07597
SCD	4.70879	11.1589	8.20334	1.25e-05	0.00124713	3.74767
AGMO	4.57718	6.76852	10.5918	1.35e-06	0.000410368	5.95595
FUT9	4.5612	9.54184	5.45456	0.000326076	0.00671781	0.399474
PPBP	4.55545	7.2898	10.7737	1.16e-06	0.000367555	6.10315
COL11A1	4.50035	8.91968	8.81233	6.76e-06	0.000889353	4.36378
S100A8	4.4654	9.62763	4.60245	0.0010966	0.0133328	-0.854246
SLC7A11	4.45861	6.72076	7.39942	2.96e-05	0.00196674	2.87013
KANK4	4.38342	7.00389	5.32455	0.000389735	0.00738827	0.215073
ABCA12	4.38216	6.80233	7.6738	2.18e-05	0.00168425	3.17828
OPCML	4.37213	7.77275	6.42317	9.29e-05	0.00339748	1.6955
FSTL5	4.29622	10.5979	6.7569	6.2e-05	0.00277425	2.11129
GRIA3	4.22921	6.256	7.5596	2.47e-05	0.00180139	3.05114
SREBF1	4.16501	11.5016	7.3242	3.22e-05	0.00203816	2.78403
S100A9	4.16184	7.20836	6.46436	8.83e-05	0.00331651	1.74765
LYPD6B	4.10851	6.43592	7.18068	3.78e-05	0.00214664	2.61777
GPR64	4.07928	8.04996	6.53256	8.12e-05	0.00319792	1.83348
CCL3	4.04852	8.49971	4.64404	0.00103107	0.0128772	-0.790616
PF4	4.04584	7.68259	7.50897	2.62e-05	0.00184734	2.99426
AGT	4.03882	9.8722	4.35683	0.00158598	0.0164863	-1.23491
CITED1	4.01768	13.2054	13.56	1.46e-07	0.000115657	8.06583
SCN1B	3.994	6.43624	14.4394	8.2e-08	7.35e-05	8.58814
SKINTL	3.98097	6.18963	9.58239	3.27e-06	0.000622239	5.08847
SSC5D	3.93574	11.015	9.78984	2.71e-06	0.000559964	5.27404
SLC35F4	3.84616	5.67755	6.9264	5.08e-05	0.00250645	2.3167
LMO1	3.8435	10.4284	7.77934	1.95e-05	0.00159058	3.29437
CXCR2	3.83222	6.6199	6.06506	0.000145638	0.00436424	1.2321
CLU	3.78926	14.6516	8.71543	7.43e-06	0.000935513	4.26838
ZFPM2	3.78453	7.61955	3.2567	0.00913143	0.0474207	-3.02508
TMPRSS6	3.7554	8.13191	4.42754	0.00142488	0.0154075	-1.12447
CTSE	3.75149	6.42837	8.64407	7.98e-06	0.000982618	4.19751
ANKRD24	3.71998	7.53326	12.1099	4.07e-07	0.000191638	7.1085
C9orf140	3.69638	7.22926	8.31815	1.11e-05	0.00116406	3.86689
ZNF385B	3.67435	6.51098	10.4767	1.49e-06	0.000427445	5.8614
CCDC85A	3.66254	7.08207	6.51033	8.35e-05	0.00324175	1.80557
ANGPTL7	3.63828	9.39697	4.56702	0.00115593	0.013713	-0.908642
SLC32A1	3.59929	14.4708	12.2188	3.76e-07	0.000185531	7.18492
NNAT	3.50922	14.5097	5.96023	0.000166655	0.00469687	1.09299
CIB2	3.49076	12.5185	6.33675	0.00010339	0.00364635	1.58532
MMP16	3.48284	6.95199	5.58152	0.000274592	0.00612942	0.577126
HIST1H1C	3.46576	13.4113	3.94884	0.00298237	0.0237667	-1.88447
C1orf54	3.4542	12.7519	9.52744	3.44e-06	0.000629214	5.03865
SAMSN1	3.45209	7.00705	9.5232	3.45e-06	0.000629214	5.03479
NOS1AP	3.41706	10.3116	4.4332	0.00141278	0.0153658	-1.11568
AVPR1B	3.40745	6.41672	6.22209	0.000119335	0.00394873	1.43753
PAQR8	3.3873	9.40314	7.19217	3.73e-05	0.00214664	2.63118
LOC644192	3.37636	6.20105	15.5211	4.22e-08	4.96e-05	9.178
EBF1	3.37463	9.12568	7.33707	3.17e-05	0.00202114	2.79881
HMGA2	3.37228	7.06966	6.76841	6.12e-05	0.00276045	2.12536
TMEM229B	3.3678	6.70021	8.38583	1.03e-05	0.00112094	3.9365
LOC439949	3.34849	7.53424	4.02942	0.00262795	0.0220863	-1.75459
LOC100507311	3.32004	6.98238	8.8695	6.39e-06	0.000868521	4.4196
PCDH10	3.31657	7.68556	4.93205	0.000677534	0.0101657	-0.356743
SAA1	3.31631	9.77043	4.75372	0.000877462	0.0117883	-0.623984
FREM1	3.31602	7.03763	6.13325	0.000133516	0.00418578	1.32175
EZH2	3.30095	7.71154	12.2303	3.73e-07	0.000185531	7.19296
AR	3.29299	11.085	10.1255	2.01e-06	0.000484223	5.56617
RGS4	3.28346	8.15598	5.38604	0.000358101	0.00704777	0.302608
LYPD6	3.27123	7.28823	3.65891	0.00473413	0.0313747	-2.35748
BMP6	3.27024	9.19643	3.94466	0.00300208	0.0238632	-1.89123
PCDH9	3.26243	7.2094	4.10703	0.00232836	0.020543	-1.6302
HIST2H2BE	3.24868	9.14773	7.52438	2.57e-05	0.00183689	3.01161
UG0898H09	3.22098	6.17143	3.54899	0.00565549	0.0351008	-2.53883
FAM155B	3.1699	9.67005	3.8603	0.00343053	0.0258234	-2.02802
S100A12	3.14626	7.06354	5.33107	0.000386241	0.00736284	0.224386
GNB3	3.13868	11.9793	5.87438	0.000186309	0.00499821	0.977886
CLMP	3.13022	8.24162	5.4168	0.000343326	0.00690137	0.346174
MESP1	3.12847	11.2423	12.9437	2.23e-07	0.00014461	7.67443
GPA33	3.12674	5.95922	3.67386	0.00462151	0.0309755	-2.33289
RALYL	3.12611	8.63689	3.66651	0.00467653	0.0311431	-2.34498
FRMPD1	3.0991	7.10926	6.73925	6.33e-05	0.00279996	2.08968
ZNF804A	3.09686	5.85078	6.03861	0.000150655	0.00443596	1.19715
KCNIP1	3.08874	5.56255	3.6153	0.00507932	0.0328129	-2.4293
AQP9	3.07754	6.33244	5.17467	0.000480114	0.00828367	-0.000597759
CYP2B6	3.05046	8.48235	6.16497	0.000128254	0.00412143	1.36321
PRR15L	3.01454	11.0435	3.85792	0.00344349	0.0258598	-2.03188
NDST4	3.01024	5.8644	3.26776	0.00896597	0.0468726	-3.00659
MMP25	3.00339	7.44823	7.825	1.86e-05	0.00156218	3.34419
FADS2	3.00297	13.7636	8.38824	1.03e-05	0.00112094	3.93897
CORO6	2.9971	10.3231	7.02374	4.53e-05	0.00236827	2.43294
RAB26	2.99564	10.5691	10.1554	1.96e-06	0.000482674	5.59166
RGS18	2.99531	7.65774	10.2834	1.76e-06	0.000462337	5.70017
SPAG5	2.97951	10.1254	7.99377	1.55e-05	0.00140955	3.52621
C6orf25	2.96964	7.0858	7.0581	4.35e-05	0.00232413	2.47368
MBL1P	2.96516	6.3344	8.39487	1.02e-05	0.00111713	3.94576
CLDN9	2.92783	9.24683	12.4576	3.15e-07	0.00018173	7.34982
GJC1	2.89998	6.21491	6.48616	8.6e-05	0.00327478	1.77516
SAA2	2.8952	8.77142	5.19176	0.000468752	0.00819205	0.0241688
PACSIN1	2.89277	10.8499	3.63272	0.00493837	0.0322904	-2.40059
KIAA1211	2.88853	9.2581	5.6261	0.000258651	0.00596021	0.638945
CASK	2.88301	11.314	7.53848	2.53e-05	0.00181945	3.02745
GHR	2.87951	7.39979	5.39415	0.00035414	0.00702864	0.314108
NOS1	2.87942	7.76342	9.08158	5.21e-06	0.000778448	4.62379
C1orf226	2.87392	10.1126	4.10362	0.00234075	0.0205896	-1.63566
DTX1	2.85541	9.13445	8.45625	9.63e-06	0.00107519	4.00838
GLUL	2.85073	11.7948	4.45288	0.00137146	0.0150637	-1.08507
PRKCQ	2.84154	5.93817	5.50802	0.000303231	0.00644665	0.474572
MIR133A1	2.84022	5.82136	3.78946	0.00383989	0.0276228	-2.14346
G6PD	2.83719	9.46833	5.42535	0.000339336	0.0068431	0.358263
FCN1	2.8334	7.5718	4.202	0.00201006	0.0189144	-1.47899
SCN1A	2.83217	7.00101	5.31138	0.000396888	0.00746744	0.196266
RORB	2.81841	6.41972	3.87657	0.00334315	0.0253701	-2.00158
SPC25	2.81242	5.49914	5.64901	0.000250851	0.00584853	0.67059
ODF3L1	2.80821	6.65415	9.53672	3.41e-06	0.000629214	5.04708
IRF6	2.79236	8.62024	5.87523	0.000186104	0.00499821	0.979023
FPR1	2.78897	8.1665	3.8629	0.00341641	0.0257659	-2.0238
HIST1H2AC	2.78559	11.4353	5.28203	0.00041335	0.00763217	0.154239
EDA	2.78473	8.41925	3.3704	0.0075711	0.0420207	-2.83535
MS4A7	2.78231	9.49877	4.27786	0.00178898	0.0175978	-1.35901
BCAR3	2.78167	9.16974	7.41655	2.9e-05	0.00194819	2.88963
KIAA0040	2.76044	6.41875	11.6823	5.63e-07	0.000225081	6.80069
PSRC1	2.7553	8.11137	7.19728	3.71e-05	0.00214664	2.63714
FILIP1L	2.74802	8.89079	5.9037	0.000179328	0.00489703	1.01732
MCC	2.73141	6.96936	7.85199	1.8e-05	0.00154864	3.37352
COL14A1	2.70654	6.75369	3.80714	0.00373311	0.027096	-2.1146
RHOBTB3	2.69743	9.12941	9.18207	4.74e-06	0.000744864	4.71898
FKBP5	2.69272	9.75563	4.96877	0.000642764	0.00983778	-0.302278
TRIM9	2.67671	6.89983	9.21608	4.59e-06	0.000738024	4.75096
NRG1	2.66317	7.35486	5.89993	0.00018021	0.00490686	1.01226
KCNH5	2.66179	6.1429	3.45349	0.00660756	0.0386691	-2.69714
AFP	2.66148	4.9963	11.0166	9.53e-07	0.000320145	6.29569
LINGO1	2.65463	6.37329	4.80863	0.000809909	0.0112254	-0.541204
KIRREL3	2.64327	6.71146	3.8831	0.00330875	0.0252412	-1.99098
MAPK12	2.64275	8.31428	5.29942	0.00040351	0.00756178	0.179155
BTBD11	2.63766	9.40694	5.0721	0.000554796	0.00906119	-0.150103
C1orf187	2.63436	5.74802	4.26981	0.00181116	0.017753	-1.37171
CCL3L3	2.63257	7.16046	3.61537	0.00507875	0.0328129	-2.42919
CLN6	2.62773	9.43218	14.9283	6.04e-08	6.31e-05	8.86157
PBK	2.6269	6.23391	5.16829	0.000484427	0.00832836	-0.00984729
MIB1	2.62611	4.89895	3.98499	0.00281751	0.0230234	-1.82612
NIM1	2.61837	10.6823	7.1826	3.77e-05	0.00214664	2.62001
ZBTB16	2.61521	10.2873	6.44951	8.99e-05	0.00335083	1.72888
MLF1	2.6134	9.23891	10.2268	1.84e-06	0.000470671	5.65234
B3GALTL	2.61191	8.44466	4.51219	0.00125458	0.014355	-0.993168
S100P	2.60619	7.37617	4.50025	0.00127723	0.0145028	-1.01163
PPARGC1B	2.58023	7.90094	13.602	1.42e-07	0.000115657	8.09172
SERPINF1	2.56709	13.3599	3.46036	0.00653374	0.0384163	-2.68572
HIST2H2AA4	2.56656	13.9616	6.67591	6.83e-05	0.00291231	2.01179
NCKAP5	2.56486	7.90582	5.6358	0.000255316	0.0059087	0.652356
ADCY5	2.556	9.42724	9.37241	3.97e-06	0.000670841	4.89656
SRC	2.55497	8.14717	3.77371	0.00393763	0.0280791	-2.16919
LANCL3	2.55122	6.91574	3.97377	0.00286762	0.0232612	-1.84421
PLEKHH1	2.55016	8.4529	7.20681	3.67e-05	0.00214664	2.64823
VSTM4	2.54934	6.08972	6.43738	9.13e-05	0.00338107	1.71352
PRDM10	2.52878	10.8653	11.6709	5.68e-07	0.000225081	6.79231
MPP2	2.52765	8.83932	8.79854	6.85e-06	0.000895162	4.35026
RIMS4	2.524	11.6352	9.47641	3.6e-06	0.00063329	4.99213
EXPH5	2.51829	7.20228	6.42681	9.25e-05	0.00339748	1.70012
LOC100288911	2.51606	8.82506	4.05396	0.00252903	0.0216093	-1.71518
LRRN1	2.51289	7.3599	4.1115	0.00231224	0.020468	-1.62306
NECAB1	2.50676	11.3734	7.18942	3.75e-05	0.00214664	2.62796
CRIP3	2.50247	8.45706	9.17946	4.75e-06	0.000744864	4.71652
PLCD4	2.49803	11.5827	5.55437	0.000284816	0.00624585	0.539338
RNF157	2.4872	9.24286	7.46871	2.74e-05	0.00189595	2.94882
ABCG4	2.47287	6.86186	4.52358	0.00123339	0.0142167	-0.975587
KDM1B	2.46657	6.25129	7.25161	3.49e-05	0.00209777	2.70026
H19	2.45901	6.1916	3.40752	0.00712379	0.040457	-2.77355
CMTM2	2.45643	4.98135	5.00537	0.000610007	0.00958437	-0.248198
SIGLEC10	2.4554	5.85431	6.56668	7.79e-05	0.00312528	1.87617
MNDA	2.45257	7.00351	4.77477	0.000850881	0.0115968	-0.5922
CCL4	2.44869	9.34335	3.3557	0.00775626	0.0428022	-2.85985
TSC22D3	2.44509	8.98148	5.28755	0.000410204	0.00761518	0.16214
EPHA3	2.44044	6.65441	4.44018	0.00139798	0.0152707	-1.10482
MLF1IP	2.43436	6.94282	4.83768	0.000776438	0.0109305	-0.497585
SYT9	2.42877	7.48862	4.31713	0.00168479	0.0170518	-1.2972
YSK4	2.42693	5.60389	7.4051	2.94e-05	0.00196271	2.8766
SLC44A4	2.4223	8.89464	5.08933	0.000541427	0.00893591	-0.12488
DARC	2.41896	7.14335	4.02547	0.00264426	0.0221759	-1.76095
MYH7	2.40627	10.2592	6.53304	8.12e-05	0.00319792	1.83407
SRRM4	2.39332	10.771	4.91719	0.000692169	0.0102545	-0.378834
MAB21L1	2.39139	5.08908	12.9785	2.17e-07	0.00014461	7.69713
RIMS3	2.3906	8.78181	3.25675	0.00913065	0.0474207	-3.025
NR2F2	2.382	12.5975	4.99095	0.000622695	0.00967465	-0.269482
HCN1	2.37636	6.62619	3.35088	0.00781794	0.0430314	-2.86788
C1orf51	2.35507	9.24533	4.19187	0.0020417	0.0190833	-1.49506
TBC1D4	2.34332	7.79638	5.56023	0.000282576	0.00623666	0.547502
NSDHL	2.34323	7.4176	6.78227	6.02e-05	0.00274399	2.14228
C1orf186	2.33685	6.65824	3.76156	0.00401485	0.0284197	-2.18906
DDIT4L	2.33331	10.7461	3.48576	0.0062684	0.0373819	-2.64357
SLC24A2	2.32984	11.2327	5.59597	0.000269314	0.00608334	0.597188
CPNE6	2.32792	6.17666	3.81648	0.00367799	0.0268847	-2.09936
GRIA4	2.32562	7.43806	12.2217	3.75e-07	0.000185531	7.18698
SGCZ	2.31755	4.08395	5.88642	0.000183409	0.00496393	0.994084
RAB7B	2.3132	7.06204	5.0101	0.000605905	0.00956385	-0.241222
ARNTL2	2.30362	8.47248	4.67314	0.000987707	0.0125396	-0.746246
MMP12	2.30353	4.90685	3.55136	0.00563378	0.034996	-2.53491
TMEM108	2.29704	7.9191	4.06017	0.00250467	0.0214694	-1.70523
BLCAP	2.29581	12.4812	10.3495	1.66e-06	0.000443725	5.75563
TMEM2	2.29487	9.52996	8.47845	9.41e-06	0.00106043	4.03094
POP1	2.29289	6.94281	8.59239	8.4e-06	0.00100008	4.14584
FOSL2	2.28247	7.60187	5.76126	0.00021612	0.00543623	0.824576
IL1R2	2.28135	6.78364	3.72443	0.00426086	0.0294087	-2.24987
LOC100652944	2.2808	5.10476	4.64883	0.00102379	0.0128119	-0.783307
HIST1H1D	2.27375	9.11702	3.42926	0.00687462	0.039622	-2.7374
ITGA4	2.27348	6.27921	5.35982	0.000371238	0.00718975	0.265353
CERS6	2.27237	13.2641	8.92999	6.03e-06	0.000840245	4.47831
TPM1	2.27127	10.5676	7.29596	3.32e-05	0.00205154	2.75152
LOC440132	2.27089	5.56063	5.3925	0.000354945	0.00703568	0.31176
C9orf174	2.26601	9.60609	6.75028	6.25e-05	0.00278628	2.10319
APOC2	2.26327	5.39628	4.70486	0.000942638	0.0122484	-0.698005
PCBP3	2.25968	8.69238	5.56556	0.000280556	0.00620655	0.554915
MRO	2.25715	6.76508	5.08353	0.000545889	0.00896239	-0.133367
OSBPL6	2.25653	11.0859	13.1137	1.98e-07	0.000143202	7.7846
PEG10	2.25213	15.587	5.06646	0.000559249	0.0090936	-0.15837
FPR2	2.25189	4.71387	6.32918	0.000104368	0.00366018	1.57562
UPP2	2.25042	5.89609	5.75024	0.000219288	0.00547928	0.809544
ANK1	2.24998	8.52957	3.79299	0.00381833	0.0274888	-2.1377
DPF3	2.24443	8.31673	4.34677	0.00161041	0.0166117	-1.25067
CDC42EP4	2.24104	9.60958	3.41683	0.00701595	0.0401321	-2.75807
LOC100652987	2.2408	13.6597	8.17456	1.28e-05	0.00126277	3.71755
PRRX1	2.23988	4.94105	3.25195	0.00920336	0.0476831	-3.03301
CPNE9	2.23365	6.59851	4.31205	0.0016979	0.0171247	-1.30519
LAPTM5	2.22976	7.32633	4.09018	0.0023902	0.0208395	-1.65715
LAPTM4B	2.22406	9.50893	4.51294	0.00125318	0.0143466	-0.992017
CA14	2.21893	8.99047	3.30272	0.00846324	0.0451127	-2.94821
CENPF	2.21635	7.47247	5.1203	0.000518256	0.00869459	-0.0796509
SLC22A16	2.21568	5.56626	4.40946	0.00146435	0.0156819	-1.15265
IGF2BP2	2.21211	8.48766	7.79688	1.91e-05	0.00158145	3.31353
GPR34	2.21202	7.65851	3.84661	0.00350587	0.0261039	-2.05028
CDH20	2.21185	5.10294	4.51897	0.00124193	0.0142829	-0.982707
GFOD1	2.21068	7.71343	7.37794	3.03e-05	0.00198165	2.84561
PCCB	2.20981	8.00445	8.27295	1.16e-05	0.00119446	3.82013
OLFM3	2.2061	6.04989	8.19237	1.26e-05	0.00124808	3.73619
MAFB	2.19904	9.30009	3.2687	0.00895204	0.0468274	-3.00502
ELAVL4	2.1977	9.91846	4.34678	0.0016104	0.0166117	-1.25066
PSD2	2.19764	6.26972	6.95552	4.91e-05	0.00245495	2.3516
CA10	2.18054	10.2769	6.86851	5.43e-05	0.00260961	2.24697
TSC2	2.17949	10.7866	6.38569	9.73e-05	0.00349369	1.64785
NCF1	2.17666	6.78242	5.05518	0.000568266	0.00918551	-0.174909
FGFR3	2.17639	6.05251	7.07116	4.29e-05	0.00231586	2.48912
RHOU	2.15796	7.75361	3.53656	0.00577083	0.0355353	-2.5594
ONECUT2	2.1565	9.71525	4.36143	0.00157493	0.0164164	-1.22771
EHD3	2.15618	9.17052	7.90155	1.71e-05	0.00149629	3.42716
GRM8	2.15606	6.90785	3.49957	0.00612892	0.0368421	-2.62068
GRAMD2	2.15365	7.89083	7.18263	3.77e-05	0.00214664	2.62005
C12orf48	2.15225	7.49952	9.02664	5.49e-06	0.000801924	4.57133
MAD2L1	2.14593	7.51802	8.13422	1.34e-05	0.00129167	3.67518
SLC25A25	2.14576	7.33277	5.3882	0.000357042	0.00704563	0.30567
CNKSR3	2.14392	5.96446	3.32696	0.00813188	0.0440545	-2.90777
FGR	2.13457	8.86994	3.21389	0.00980183	0.0495557	-3.09665
LTA4H	2.12381	14.0165	9.26494	4.38e-06	0.000720293	4.79672
SGK494	2.1217	9.8033	5.75998	0.000216487	0.00544183	0.822821
TP53BP2	2.12034	9.9789	9.38147	3.93e-06	0.000669482	4.90492
BCL2A1	2.11788	5.76918	5.26064	0.000425812	0.00775931	0.123523
BUB1	2.11544	5.29636	4.55006	0.00118554	0.0139312	-0.934749
CDH10	2.1132	9.76844	6.58961	7.58e-05	0.00307708	1.90478
TRIM62	2.11121	6.52958	6.49432	8.51e-05	0.00325688	1.78543
LRRC7	2.10927	5.00526	7.94156	1.64e-05	0.00144415	3.47025
MIOS	2.10913	7.25747	4.44058	0.00139712	0.0152707	-1.10419
C5orf27	2.10113	7.14124	3.78387	0.00387426	0.0277957	-2.15258
TIPARP	2.09583	11.2322	3.23984	0.00938953	0.0482886	-3.05325
FADS1	2.09563	12.2712	7.72833	2.06e-05	0.00165895	3.23842
CCNF	2.09184	6.35684	5.37344	0.00036435	0.00709653	0.284719
ADAMTS8	2.09113	5.41682	4.96277	0.000648317	0.00987699	-0.311172
KIAA0664	2.09078	8.95247	6.59849	7.5e-05	0.00305735	1.91584
PRKCG	2.08848	6.02544	3.23038	0.00953767	0.0486762	-3.06906
SLC8A2	2.08265	10.6502	5.76428	0.000215261	0.00542186	0.828691
YPEL1	2.07796	10.2967	6.58721	7.6e-05	0.00308274	1.90178
ITGA2B	2.07555	7.46269	7.37439	3.04e-05	0.00198197	2.84155
ENTPD3	2.07303	9.642	4.60002	0.00110057	0.0133552	-0.857979
RASA4P	2.06651	7.34457	6.32146	0.000105376	0.0036834	1.56573
CA9	2.06526	5.27246	3.87113	0.00337208	0.0255212	-2.01041
RPS6KA5	2.0571	11.521	8.8397	6.58e-06	0.000882302	4.39055
CXCR2P1	2.05124	6.54947	5.98544	0.000161317	0.0046024	1.12659
LOC100129447	2.04615	7.05124	5.32204	0.000391086	0.0074027	0.211494
ZNF365	2.04539	10.1746	5.19752	0.000464988	0.00817247	0.0325058
MMP15	2.04429	6.53768	4.78726	0.000835521	0.0114621	-0.573376
SLC29A1	2.03649	12.0229	9.29406	4.27e-06	0.000703988	4.82389
VAV3	2.03598	9.63724	3.26906	0.00894673	0.0468111	-3.00442
C8orf47	2.03268	9.30738	7.46116	2.76e-05	0.00190489	2.94027
PTAFR	2.03183	6.8196	4.36714	0.00156132	0.0163383	-1.21876
GAPT	2.03175	6.12653	4.40569	0.00147272	0.0157216	-1.15853
SUSD4	2.03131	8.50147	3.97776	0.00284968	0.0231731	-1.83777
MAPK11	2.02839	11.8613	5.62408	0.000259351	0.00597035	0.636148
SYK	2.02636	9.5382	4.59403	0.00111041	0.0134227	-0.867167
GUCA2B	2.02624	8.67429	4.64327	0.00103224	0.0128799	-0.791787
SHC2	2.02064	12.661	6.23136	0.00011795	0.00392091	1.44956
KCNH3	2.01688	10.5702	5.38292	0.000359641	0.00706683	0.29817
UBE2E3	2.01473	10.3339	6.61713	7.33e-05	0.00303052	1.93901
ELOVL5	2.01358	9.57811	9.44115	3.72e-06	0.000646935	4.95985
SAA4	2.0064	5.69132	4.48539	0.00130604	0.0146671	-1.03464
INSM1	2.00265	12.0259	5.18425	0.00047371	0.00822219	0.0132883
PRC1	1.99817	8.73356	5.19757	0.000464957	0.00817247	0.0325754
CCNG2	1.99787	10.3506	8.15019	1.32e-05	0.00127696	3.69198
PRKCD	1.9942	9.07038	7.04824	4.4e-05	0.00232789	2.46201
NDUFA4L2	1.98939	7.66145	5.09246	0.000539037	0.00891603	-0.120307
OGFRL1	1.98577	9.92574	3.51558	0.00597114	0.0362644	-2.59414
CSF2RA	1.98195	6.53238	5.01066	0.000605421	0.00956385	-0.240394
ATAD2	1.97215	7.84702	6.0414	0.000150118	0.00442708	1.20084
UBE2C	1.96987	6.43651	4.7043	0.000943416	0.0122501	-0.698858
CCND2	1.96582	12.0474	6.4684	8.79e-05	0.00331651	1.75276
UNC5A	1.96291	6.97577	3.85013	0.00348633	0.0260154	-2.04455
HIST1H2AD	1.95918	12.4427	5.55502	0.000284569	0.00624585	0.540236
KPTN	1.95654	9.67806	6.55589	7.9e-05	0.00314455	1.86269
ALB	1.95357	6.12894	4.50548	0.00126726	0.0144594	-1.00355
ABCA2	1.95244	9.4927	8.17824	1.28e-05	0.00126277	3.7214
EMB	1.94998	11.2597	5.69807	0.000234981	0.00569006	0.738124
SIGLEC8	1.94991	5.83175	3.44562	0.00669304	0.0389633	-2.71021
CSF3R	1.94902	6.11326	4.90979	0.000699584	0.0103017	-0.38985
SLC17A1	1.94255	4.57992	7.70029	2.12e-05	0.00167424	3.20754
KIF15	1.94221	6.36023	7.57476	2.43e-05	0.0017783	3.0681
CALML4	1.93435	9.72766	4.66626	0.000997772	0.0126121	-0.756718
C1orf95	1.93324	6.11752	6.41938	9.33e-05	0.00339828	1.69069
EPB41L2	1.92715	8.33718	6.2524	0.000114875	0.00386305	1.47679
HIF3A	1.9269	5.74364	3.86216	0.00342043	0.0257783	-2.025
PCK2	1.92293	7.99317	6.0684	0.000145018	0.00435863	1.23651
OSBPL3	1.91994	6.75329	7.11866	4.06e-05	0.00224301	2.54511
EPHA7	1.91928	7.16505	6.25691	0.000114228	0.00385778	1.48261
ADAM22	1.91519	7.86627	11.4437	6.78e-07	0.000247687	6.62341
PRKD3	1.91414	8.90976	4.62145	0.00106612	0.0131615	-0.825143
LOC253039	1.91245	6.50941	3.99958	0.0027537	0.022686	-1.8026
FAM101B	1.91028	7.74978	5.19679	0.000465464	0.00817332	0.0314467
ADRB2	1.90633	6.11452	4.92975	0.000679772	0.010179	-0.360151
PFKFB2	1.90391	9.62901	4.19871	0.00202029	0.0189726	-1.48421
AP1G2	1.90299	11.6988	10.5763	1.37e-06	0.000412408	5.94329
DOK3	1.90208	7.6643	6.667	6.9e-05	0.00292162	2.00078
USP2	1.90005	7.23128	4.24125	0.00189227	0.0182158	-1.41682
WNK2	1.89248	7.27851	7.42672	2.87e-05	0.00194008	2.9012
PF4V1	1.8915	4.94696	7.01443	4.58e-05	0.00237748	2.42188
HIGD1B	1.89018	8.3204	4.28308	0.00177474	0.0175147	-1.35079
STK17B	1.88446	6.66189	3.80748	0.00373108	0.0270887	-2.11404
STX1A	1.88233	8.29316	5.55386	0.000285015	0.00624585	0.538617
TP53AIP1	1.88036	5.54268	5.03483	0.000584939	0.00934264	-0.20481
EMR3	1.87875	4.38808	4.96997	0.000641666	0.00983139	-0.300511
CCNB2	1.87103	6.35053	4.0163	0.0026825	0.0223423	-1.77569
NFIL3	1.8689	9.94009	3.57313	0.00543824	0.0342725	-2.49892
MIDN	1.86847	7.58584	4.05263	0.00253429	0.0216257	-1.71731
PLXNC1	1.86635	7.17557	5.51808	0.000299131	0.00639562	0.488645
EMR2	1.86557	5.9341	3.78388	0.00387423	0.0277957	-2.15257
PRKAB2	1.86297	10.7828	4.34397	0.00161728	0.0166496	-1.25506
CHAF1B	1.86153	9.24019	6.77598	6.06e-05	0.00275123	2.13461
E2F2	1.86045	6.15498	3.31508	0.00829256	0.0445403	-2.92759
CD53	1.85996	8.29059	3.37716	0.00748763	0.0417638	-2.8241
ITPR2	1.85824	7.85149	10.0154	2.22e-06	0.000518378	5.47141
OLFML2B	1.85764	6.54155	4.3087	0.00170661	0.0171964	-1.31046
RHBDL2	1.85236	6.97621	4.64272	0.00103308	0.0128834	-0.792629
GPSM2	1.85174	7.47122	3.97538	0.00286038	0.0232313	-1.84162
SUPT6H	1.84947	7.94723	8.80523	6.81e-06	0.000892429	4.35682
SLC39A8	1.84703	10.134	4.32609	0.00166193	0.0169068	-1.28312
FAM111B	1.84677	4.4991	3.69939	0.00443558	0.0301719	-2.29095
CHKA	1.84547	7.46045	8.58712	8.44e-06	0.00100008	4.14057
MAPK8IP1	1.84522	10.3063	5.26352	0.000424112	0.0077435	0.127658
PDE4DIP	1.84424	8.86985	9.58633	3.26e-06	0.000622239	5.09203
FOLR2	1.84347	8.15531	4.91069	0.000698674	0.0103017	-0.388505
CD163L1	1.84207	7.10766	4.18326	0.00206904	0.0192388	-1.50875
ITGB3	1.83577	6.30168	4.0133	0.00269513	0.0224078	-1.78052
ATP5E	1.83474	8.02262	4.87366	0.000737018	0.010579	-0.443732
TMEM184A	1.83159	9.23829	4.62103	0.00106679	0.0131615	-0.825793
BIRC5	1.83099	7.0642	3.62735	0.00498136	0.0324528	-2.40944
FAM64A	1.82852	6.43544	4.6705	0.000991556	0.0125652	-0.750263
KIAA1456	1.82618	6.91111	4.10682	0.00232912	0.0205449	-1.63054
PKD1	1.82182	11.2508	10.1685	1.94e-06	0.000482056	5.60285
ROR1	1.82178	8.11052	5.57204	0.000278118	0.00616711	0.563938
DAND5	1.81814	5.69593	8.47067	9.49e-06	0.00106558	4.02304
AOAH	1.81727	6.1071	3.83171	0.00358995	0.0264467	-2.07455
NME9	1.8122	8.30848	8.21638	1.23e-05	0.00123438	3.76129
ADORA3	1.81005	5.49292	3.68866	0.00451278	0.0305479	-2.30857
MS4A6A	1.80938	9.44398	4.37629	0.0015398	0.0161982	-1.20446
ACSL1	1.80904	10.6117	4.97449	0.000637526	0.00979588	-0.293819
GAS2	1.80872	8.84629	3.87653	0.00334335	0.0253701	-2.00164
SLC26A2	1.80865	9.52236	3.73769	0.00417126	0.0290031	-2.22814
TEKT5	1.80623	6.66635	4.26555	0.00182302	0.0177985	-1.37843
KIAA0922	1.80317	5.83379	7.35445	3.11e-05	0.00200774	2.81874
RTN4RL1	1.80274	9.11241	6.04747	0.000148954	0.00441001	1.20887
KLHL17	1.79782	6.91444	7.19639	3.72e-05	0.00214664	2.63609
GALNT13	1.79377	5.23506	4.4725	0.00133157	0.0147896	-1.05462
TOP2A	1.79172	5.35304	3.93094	0.00306776	0.0241506	-1.91343
MAK	1.789	7.7475	3.95992	0.00293078	0.023525	-1.86657
COL25A1	1.78876	5.62648	4.71811	0.000924472	0.0121399	-0.677903
RABGGTA	1.78288	8.69979	7.18977	3.74e-05	0.00214664	2.62837
FGD6	1.7827	7.61697	7.46487	2.75e-05	0.00190054	2.94448
DDIT4	1.78	12.8029	3.41009	0.00709385	0.0403454	-2.76928
ERAP2	1.7755	5.46622	3.20897	0.00988201	0.0498472	-3.10488
ZNF238	1.775	6.77467	6.42155	9.31e-05	0.00339748	1.69345
TPI1	1.77458	10.1649	6.8527	5.53e-05	0.00263968	2.22786
LILRB3	1.77343	6.84601	3.39572	0.00726296	0.0409508	-2.79319
TLCD1	1.77202	8.1296	12.2139	3.77e-07	0.000185531	7.18151
C1orf145	1.7714	7.2803	4.27322	0.00180174	0.0176837	-1.36634
LRRC25	1.7664	6.66318	3.42539	0.00691829	0.0397701	-2.74383
PTPLAD2	1.76627	7.56769	4.50433	0.00126944	0.0144767	-1.00532
P2RY13	1.76439	5.94577	5.71936	0.000228436	0.005607	0.767317
SESN3	1.76354	7.26936	5.82384	0.00019904	0.0052013	0.909619
DOK4	1.76162	8.27303	8.52691	8.97e-06	0.00103337	4.07998
SEMA4G	1.75674	8.6297	6.48792	8.58e-05	0.00327108	1.77737
PGBD5	1.75662	8.61598	5.37237	0.000364886	0.00710329	0.283199
KLF13	1.75225	12.3715	6.1963	0.000123275	0.00403028	1.40404
IL34	1.75179	7.2524	3.45817	0.00655722	0.0385123	-2.68937
KRTAP6-3	1.7515	7.24423	4.29711	0.00173707	0.017356	-1.32868
SLC38A11	1.74759	8.48932	3.43736	0.00678405	0.0392723	-2.72393
SLC7A7	1.74363	7.53985	3.68656	0.00452801	0.0306059	-2.31201
GAMT	1.74217	10.1314	6.61192	7.38e-05	0.00304017	1.93253
RILP	1.73898	7.35578	6.23503	0.000117408	0.0039098	1.4543
ROGDI	1.73819	9.91959	9.12789	4.99e-06	0.000766463	4.66778
C11orf41	1.73819	9.00084	5.53914	0.00029073	0.00628947	0.518093
GRIK5	1.73483	7.94684	8.32863	1.1e-05	0.00115812	3.8777
PHLDA1	1.73378	6.00177	4.01149	0.00270276	0.0224514	-1.78342
STARD5	1.7325	7.1694	4.08115	0.00242402	0.0210099	-1.6716
NUF2	1.7323	5.96525	5.18829	0.000471033	0.008212	0.0191479
ATP5B	1.7318	13.8762	7.36892	3.06e-05	0.00198726	2.8353
MGLL	1.72928	11.6152	4.1121	0.00231011	0.020463	-1.62211
HDAC10	1.72452	9.78926	6.41281	9.41e-05	0.00341443	1.68235
CLTCL1	1.72269	8.8242	5.33302	0.000385204	0.00735424	0.227166
KREMEN1	1.71907	10.7722	5.66504	0.000245543	0.00578934	0.692692
HOMER2	1.71896	7.75909	4.61899	0.00107002	0.0131721	-0.828911
NAIP	1.71784	8.33044	3.22805	0.00957453	0.0487999	-3.07296
OSBPL1A	1.71675	11.2926	7.36166	3.08e-05	0.00200004	2.82699
ITIH5	1.71635	7.60286	6.02351	0.000153604	0.00448071	1.17715
AMIGO1	1.71583	7.08007	5.69558	0.00023576	0.00569916	0.734707
STARD9	1.71558	9.17727	5.14461	0.000500815	0.00849472	-0.0442507
RPRM	1.71531	5.93653	3.59216	0.00527307	0.0335859	-2.46748
ZNF189	1.715	7.94891	3.54043	0.00573468	0.0353996	-2.553
CD209	1.71323	8.03506	4.79268	0.000828941	0.0114135	-0.565207
NPAS3	1.70955	6.42635	4.72653	0.000913116	0.0120627	-0.665134
DUSP27	1.70389	4.78574	4.53631	0.00121013	0.0140807	-0.955936
FGFBP2	1.70177	6.06351	4.75393	0.000877187	0.0117883	-0.623661
MRAP2	1.69852	6.7122	6.20718	0.000121595	0.00399628	1.41818
SLC11A1	1.69845	6.08283	5.72362	0.00022715	0.00558937	0.773151
TROAP	1.69119	7.77402	4.90474	0.000704692	0.0103221	-0.397371
VPS53	1.68724	7.84666	3.54048	0.00573417	0.0353996	-2.55291
IGFBPL1	1.68358	5.66361	5.08518	0.000544617	0.00895154	-0.130955
FGF12	1.68085	7.70017	3.49327	0.00619216	0.0371037	-2.63112
ADAM11	1.67839	6.88706	5.45117	0.000327587	0.00672876	0.394696
SETD5	1.67612	6.92292	5.49052	0.000310516	0.00654713	0.450027
CAB39L	1.67564	11.2181	5.27433	0.000417793	0.00767279	0.143183
FANCA	1.67175	5.5198	6.57708	7.7e-05	0.00310248	1.88915
TNF	1.6713	5.80666	3.20819	0.00989479	0.0498675	-3.10618
2018-09-12	1.66897	7.2868	3.92825	0.00308076	0.0242137	-1.91777
ACCN3	1.66831	7.85814	3.85519	0.00345846	0.0259152	-2.03633
TPI1P2	1.66788	12.9337	8.83086	6.64e-06	0.000885808	4.38191
2018-03-01	1.66652	6.94928	7.71734	2.08e-05	0.00166101	3.22633
SERINC2	1.66537	6.53511	3.60913	0.00513031	0.0330232	-2.43949
ZNF385A	1.66208	12.1332	6.40884	9.46e-05	0.00342648	1.67731
CXCR1	1.66068	5.83295	4.15672	0.00215565	0.0197097	-1.55094
KIF2C	1.65991	7.79315	6.27908	0.0001111	0.00380408	1.51122
KIF1A	1.65904	7.95517	6.78672	5.98e-05	0.00274399	2.1477
ASPH	1.6588	10.2968	6.60667	7.43e-05	0.00304375	1.92601
ITGAD	1.65772	4.4609	3.62417	0.00500702	0.0325357	-2.41468
SLC29A2	1.65764	7.8633	7.76147	1.99e-05	0.00160753	3.27481
MT2A	1.65731	14.0517	4.75538	0.000875338	0.0117765	-0.62148
TMEM135	1.65574	8.18258	8.00428	1.53e-05	0.00140673	3.53743
CALM1	1.65495	12.6718	7.17093	3.83e-05	0.00216459	2.60638
ADD2	1.65334	6.90331	5.29206	0.000407648	0.00759166	0.168604
LOC79015	1.65094	6.34988	5.76926	0.000213851	0.00540445	0.835478
TRIOBP	1.64861	9.31269	4.36209	0.00157335	0.0164094	-1.22667
U2AF1L4	1.64656	10.0728	8.48707	9.33e-06	0.00105761	4.03968
OSBPL7	1.64432	5.707	4.00696	0.00272204	0.0225425	-1.79072
PPM1E	1.64373	6.71952	4.60087	0.00109917	0.0133515	-0.856664
INPP5J	1.64111	8.39234	4.40821	0.00146712	0.0156967	-1.1546
HPS3	1.63967	9.83784	7.22837	3.58e-05	0.00212998	2.67331
ARRDC1	1.63792	7.69187	9.84226	2.59e-06	0.000559964	5.32032
GOLGA6L9	1.6369	8.37622	7.60086	2.37e-05	0.00175195	3.09725
CADM3	1.63687	10.9114	4.5741	0.00114381	0.0136207	-0.897761
ANKRD22	1.63604	6.07914	4.20697	0.00199474	0.0188359	-1.47111
TGFBR3	1.63468	9.13184	3.48563	0.00626979	0.0373843	-2.64379
DBP	1.63389	10.7165	4.81046	0.000807758	0.0112079	-0.538456
PIGS	1.63193	8.24009	6.38728	9.71e-05	0.00349016	1.64988
GREB1	1.63065	7.35246	3.48822	0.00624331	0.0372973	-2.63949
NIN	1.62992	8.99028	6.92234	5.1e-05	0.00251149	2.31182
JAKMIP2	1.62932	8.05963	5.06627	0.000559399	0.0090936	-0.158646
TK1	1.6277	8.30358	3.43185	0.00684554	0.0395089	-2.7331
PLEK	1.62731	6.66122	3.39557	0.00726481	0.040951	-2.79345
LOC643201	1.62501	7.42841	3.5313	0.00582036	0.0357584	-2.5681
RAB1B	1.62478	7.13826	5.69883	0.000234745	0.00569006	0.739163
CDK18	1.62326	8.05918	3.77735	0.00391484	0.0279802	-2.16325
SSX2IP	1.6206	9.24861	4.92656	0.000682895	0.0101901	-0.36489
ACOT2	1.618	8.6323	6.46485	8.83e-05	0.00331651	1.74826
CFP	1.61678	8.72804	3.98516	0.00281674	0.0230221	-1.82583
TMEM145	1.61525	11.9696	5.52441	0.00029658	0.0063664	0.497499
ZNF185	1.61322	8.71896	4.64234	0.00103367	0.012884	-0.79322
EBI3	1.61171	7.1391	4.71667	0.000926426	0.0121553	-0.680084
ITGA6	1.61157	9.40754	4.12859	0.0022517	0.0201645	-1.59578
LGALS3BP	1.60969	11.8088	6.92095	5.11e-05	0.00251149	2.31015
D4S234E	1.60904	12.921	3.96039	0.00292864	0.0235179	-1.86582
CDHR3	1.6077	6.15069	3.58035	0.00537492	0.033953	-2.48698
HMMR	1.60304	6.26377	4.14703	0.00218824	0.019861	-1.56638
CDCA5	1.60299	7.43654	4.66286	0.0010028	0.0126493	-0.761909
RPGRIP1	1.60282	5.59632	3.45552	0.00658559	0.0385585	-2.69376
MLXIP	1.60157	7.14008	4.02515	0.00264556	0.0221769	-1.76145
CENPA	1.59989	4.38317	4.59004	0.001117	0.0134505	-0.873275
KCNQ5	1.59936	5.97611	4.06659	0.00247968	0.0213135	-1.69493
ARHGEF11	1.59823	6.37882	7.61329	2.33e-05	0.00174201	3.1111
LIMA1	1.59712	11.6365	8.004	1.53e-05	0.00140673	3.53713
MKNK2	1.59688	8.18631	5.91274	0.000177234	0.0048514	1.02944
RAB15	1.59543	12.0195	3.75985	0.00402585	0.0284707	-2.19185
STXBP5L	1.59245	9.91151	4.86161	0.000749978	0.0107251	-0.461749
HTR3A	1.58964	5.75418	3.41718	0.00701196	0.0401321	-2.75749
CEACAM4	1.58771	5.59868	5.83254	0.000196784	0.00517106	0.921396
JAK2	1.58769	8.48961	4.1443	0.00219754	0.0198719	-1.57074
TREML1	1.58701	6.19247	7.09208	4.19e-05	0.00228362	2.51381
MAN2A1	1.58583	7.84393	5.01753	0.000599527	0.00950304	-0.230281
ULK1	1.58574	14.7563	5.82221	0.000199467	0.0052071	0.907407
C1orf110	1.58497	5.54481	3.58469	0.00533733	0.0338189	-2.47983
ProSAPiP1	1.58364	9.47626	5.20944	0.000457307	0.00810573	0.0497309
ADAMTS14	1.57869	6.4568	5.11616	0.000521291	0.00871295	-0.0856887
STRADB	1.57806	10.5902	6.44952	8.99e-05	0.00335083	1.72889
SH3GLB2	1.57485	10.1711	6.50619	8.39e-05	0.00324782	1.80036
ATP8A1	1.57292	8.39205	5.57951	0.000275334	0.00613785	0.574336
MALT1	1.57103	6.7204	6.47056	8.76e-05	0.00331455	1.75547
SIDT2	1.56736	12.9153	5.22147	0.00044969	0.00801982	0.0671011
KCND1	1.56675	4.92861	3.32832	0.00811363	0.0440063	-2.90549
TMEM18	1.56616	7.45355	6.17582	0.000126506	0.00409088	1.37736
C20orf112	1.56558	7.54161	6.44105	9.09e-05	0.0033725	1.71816
NEK2	1.56417	5.16078	3.40983	0.00709689	0.0403454	-2.76971
ELAVL2	1.5641	5.70506	3.83438	0.00357471	0.0263861	-2.0702
SLC19A2	1.56324	10.5097	6.6166	7.34e-05	0.00303052	1.93836
TPX2	1.56198	6.45691	5.9219	0.000175138	0.00483423	1.04173
PHKA1	1.56154	7.56594	3.2169	0.00975294	0.0494081	-3.0916
CRIP2	1.55794	12.1383	4.88406	0.000726024	0.010494	-0.428196
TBCD	1.55783	6.94998	7.05492	4.37e-05	0.00232413	2.46992
DAPP1	1.55535	5.74631	7.06537	4.32e-05	0.00231807	2.48228
ENAH	1.55292	6.94726	4.54775	0.00118963	0.0139478	-0.938303
PRIM2	1.5528	8.07177	3.55581	0.00559319	0.034844	-2.52755
ARHGEF6	1.5519	6.63936	4.14751	0.00218664	0.0198597	-1.56562
PDE5A	1.55175	6.42177	4.45095	0.00137546	0.0151031	-1.08807
BEND6	1.54662	6.43388	4.12122	0.00227761	0.0202664	-1.60755
DUSP10	1.5466	5.55373	4.28366	0.00177316	0.0175037	-1.34987
SPATA9	1.5443	5.69597	3.26571	0.00899643	0.0469574	-3.01002
SPIRE2	1.5443	8.58205	5.53949	0.000290596	0.00628947	0.518569
ABCA1	1.54285	6.51225	7.2695	3.42e-05	0.00207894	2.72097
DMD	1.54258	6.56765	6.81214	5.81e-05	0.00269615	2.17865
LILRA4	1.54258	6.23505	3.70986	0.00436164	0.0298989	-2.27376
FAM83D	1.54046	4.89086	4.29815	0.00173433	0.0173373	-1.32705
MANEA	1.5397	8.6839	6.15705	0.000129546	0.00413825	1.35287
LIFR	1.53788	7.98022	4.70979	0.000935839	0.0122192	-0.690527
SELPLG	1.5347	8.26756	3.34598	0.00788128	0.0432637	-2.87605
ASPM	1.5318	5.59113	3.63628	0.00491007	0.0321453	-2.39473
UNC13B	1.5315	8.16284	4.95975	0.000651124	0.00989971	-0.315638
HCK	1.53075	6.51758	4.08898	0.00239466	0.0208687	-1.65907
RRM2	1.53041	5.13926	3.78724	0.00385347	0.0276782	-2.14708
UACA	1.53039	7.15878	3.52442	0.0058859	0.0359526	-2.5795
TUBB1	1.52931	5.36406	5.92868	0.000173604	0.00480701	1.05081
TLN2	1.52894	7.80004	4.34243	0.00162108	0.016659	-1.25748
EPHB2	1.52796	7.10067	6.10448	0.000138492	0.0042612	1.284
C20orf132	1.52578	8.14912	7.55282	2.49e-05	0.00180139	3.04354
LSMD1	1.52565	15.4272	7.27706	3.39e-05	0.00207206	2.7297
PLB1	1.52313	7.49949	4.15455	0.00216293	0.0197314	-1.55441
C1orf38	1.52249	7.12233	3.56143	0.00554245	0.0346405	-2.51826
NRG3	1.52212	5.85192	4.63772	0.00104075	0.0129552	-0.800273
ESR2	1.51984	5.2265	3.84323	0.0035248	0.0261632	-2.0558
LDHA	1.51919	10.3725	3.93557	0.0030454	0.0240551	-1.90593
SLC4A2	1.51895	6.85237	6.05925	0.000146725	0.0043707	1.22443
SLC37A2	1.51894	7.91689	3.75891	0.00403192	0.0284976	-2.1934
MYLIP	1.51893	8.8922	5.07485	0.000552638	0.00903684	-0.146073
SESN1	1.51686	9.67379	4.92651	0.000682949	0.0101901	-0.364972
ANGPTL5	1.51669	5.30013	5.65387	0.000249227	0.00583055	0.677304
COG2	1.51668	8.10128	6.52862	8.16e-05	0.0032003	1.82853
KIAA0247	1.51525	12.0394	7.00498	4.63e-05	0.0023836	2.41064
MKRN3	1.51334	7.10063	7.7386	2.04e-05	0.00164416	3.24971
CCDC126	1.51331	8.74725	9.01105	5.58e-06	0.000804036	4.55639
MAPRE2	1.51258	10.689	6.37825	9.82e-05	0.00351597	1.63837
CLPB	1.50944	8.39408	5.45295	0.000326795	0.00671835	0.397197
ANO10	1.5094	8.87985	3.78012	0.00389753	0.0278935	-2.15871
FCGR2A	1.50841	8.49959	4.02414	0.00264977	0.0222023	-1.76309
C10orf58	1.50612	13.3847	4.87629	0.00073422	0.0105534	-0.439801
MAP2K1	1.506	11.2261	5.81512	0.000201331	0.00522849	0.897799
SPEG	1.50532	14.0729	3.64299	0.00485719	0.0319483	-2.38367
RND3	1.50413	8.58358	4.9078	0.000701584	0.0103017	-0.392801
CEP85	1.50321	7.88123	4.33216	0.00164664	0.0168195	-1.2736
REG1B	1.49844	5.32477	5.31743	0.000393582	0.0074303	0.204916
CDCA8	1.49671	7.74086	5.00341	0.000611715	0.00960318	-0.251088
MID1IP1	1.4966	9.27592	3.96213	0.00292061	0.0235025	-1.863
ZNF300	1.49257	5.86022	3.78329	0.0038779	0.0278112	-2.15354
MAN2A2	1.49097	13.6973	6.54252	8.03e-05	0.00317088	1.84595
TMEM109	1.49057	8.41789	5.09002	0.000540895	0.00893106	-0.123865
C16orf59	1.49055	9.21627	5.40352	0.000349623	0.0069647	0.327382
ODZ3	1.48953	7.6132	6.45794	8.9e-05	0.00333275	1.73954
CLCN5	1.48817	6.65959	4.76487	0.000863275	0.0116811	-0.607142
OTUB1	1.48717	9.23412	8.60651	8.28e-06	0.000995434	4.15999
ASAP1	1.4735	6.50407	5.79136	0.000207716	0.00530348	0.86555
PKMYT1	1.47309	9.02573	5.06918	0.000557098	0.00909088	-0.154384
PSEN2	1.46736	8.05669	4.32936	0.00165367	0.0168684	-1.27799
TRIM3	1.46603	5.41198	4.15455	0.00216293	0.0197314	-1.55441
CD300A	1.46507	6.30753	3.87866	0.0033321	0.0253428	-1.99819
ACAP3	1.46489	8.8075	8.3259	1.1e-05	0.00115812	3.87489
HIST1H2AA	1.46312	5.66738	3.40992	0.00709584	0.0403454	-2.76956
LPCAT3	1.46277	7.91013	8.22077	1.22e-05	0.00123438	3.76586
METAP1	1.46138	7.00752	7.13558	3.98e-05	0.00221728	2.56498
SNX33	1.45878	5.82542	3.78141	0.00388951	0.0278573	-2.1566
SYCE3	1.45871	8.39468	3.48447	0.00628163	0.0374312	-2.64571
DOPEY1	1.4567	9.95525	9.25434	4.43e-06	0.000724329	4.78681
C1orf74	1.45484	6.94387	5.08015	0.000548508	0.0089897	-0.138316
FAM127B	1.45478	11.0303	4.74328	0.00089097	0.0118861	-0.639769
TMEM8A	1.45392	9.36772	4.14218	0.00220474	0.0198978	-1.5741
ZMYM3	1.45376	9.84755	5.3265	0.000388687	0.00738027	0.217857
POR	1.45291	11.5529	6.80945	5.83e-05	0.00269615	2.17538
LOC100127983	1.45285	7.11064	4.96287	0.00064822	0.00987699	-0.311017
LOC100506495	1.45219	8.07986	3.51473	0.00597946	0.0362739	-2.59555
KLF9	1.45203	12.3734	3.88916	0.00327715	0.0251001	-1.98114
NLRP12	1.45138	5.23657	4.12791	0.00225407	0.020172	-1.59686
RAD51AP1	1.4507	4.97182	5.24926	0.000432603	0.00783583	0.10716
RNPC3	1.44724	7.03413	4.52827	0.00122477	0.0141614	-0.968345
GALNT11	1.44719	9.1873	6.00455	0.000157394	0.00455594	1.152
MYO1F	1.44682	8.55556	3.249	0.00924831	0.0478317	-3.03794
PCDHB17	1.44546	5.38156	3.37432	0.00752262	0.0418442	-2.82883
CYBASC3	1.44344	8.71989	5.35603	0.000373181	0.00720883	0.259955
ELAC2	1.44141	9.87108	6.89821	5.25e-05	0.00254774	2.2828
TEX2	1.44097	10.6802	7.37738	3.03e-05	0.00198165	2.84497
FBXO2	1.44005	14.3297	3.5846	0.0053381	0.0338189	-2.47998
SEC22C	1.43976	10.1443	4.50888	0.00126083	0.0143959	-0.998293
HEXDC	1.43874	10.3837	4.68962	0.000964006	0.0123731	-0.721159
TREM1	1.43784	5.59607	3.85587	0.0034547	0.0259152	-2.03522
LOC641467	1.43763	8.00185	3.84479	0.00351605	0.0261376	-2.05325
ARHGAP32	1.43696	9.85901	5.81009	0.000202664	0.005245	0.890984
ATP1B1	1.43402	15.2169	5.59369	0.000270137	0.00608334	0.594034
ARHGAP19	1.43399	7.83646	6.933	5.04e-05	0.00250027	2.32463
STK39	1.43389	11.9102	6.97672	4.79e-05	0.00242087	2.37694
HOXD4	1.43389	4.50029	3.2476	0.00926984	0.0479005	-3.04029
FRAT2	1.43367	10.0589	4.68263	0.000973987	0.0124368	-0.731799
SPATA2	1.43189	6.85332	4.19224	0.00204054	0.0190833	-1.49448
MCU	1.43172	7.77964	6.95667	4.9e-05	0.00245495	2.35298
SEMA6A	1.43152	6.49892	4.31634	0.00168683	0.0170633	-1.29845
KLHDC7B	1.42974	6.66875	3.45218	0.0066217	0.0387278	-2.69932
SULT1C2	1.42924	6.36264	3.68363	0.00454938	0.0306743	-2.31683
MAOA	1.42855	9.17296	3.61406	0.00508954	0.0328619	-2.43135
PTOV1	1.42726	11.0022	9.94341	2.36e-06	0.000538949	5.40892
PPM1F	1.42687	6.97942	5.45386	0.00032639	0.00671781	0.398481
IL16	1.4231	6.55123	3.8843	0.00330243	0.0252224	-1.98902
SLC2A12	1.42226	5.80128	3.64127	0.00487073	0.031989	-2.38651
MAMDC4	1.42154	10.5759	3.72953	0.00422616	0.0292658	-2.24151
ACER3	1.41895	6.80269	4.97754	0.000634752	0.00978472	-0.28931
KIAA2013	1.41894	10.2227	8.04205	1.47e-05	0.0013832	3.57768
ENO2	1.41893	12.4668	5.67196	0.000243286	0.00576446	0.702233
PRKAB1	1.41889	8.90418	4.60513	0.00109224	0.0133002	-0.850135
FAM78B	1.41764	7.8318	4.18026	0.00207864	0.0192808	-1.51351
AMY1C	1.4164	10.6866	3.70015	0.00443018	0.0301535	-2.2897
SLC7A4	1.41483	10.5889	4.35445	0.00159172	0.0165095	-1.23864
SNX10	1.41356	10.8191	6.27243	0.000112028	0.00381332	1.50265
LRRC48	1.41341	6.91945	3.29898	0.00851568	0.0453189	-2.95447
APOBEC3B	1.41266	5.45145	5.44395	0.000330829	0.00675847	0.384512
C14orf162	1.41262	8.10984	3.76162	0.00401452	0.0284197	-2.18897
C5orf13	1.41161	12.1099	6.72638	6.43e-05	0.00281673	2.07389
CRY2	1.41003	7.72649	6.74556	6.28e-05	0.0027898	2.09741
CYC1	1.40998	12.0267	7.61397	2.33e-05	0.00174201	3.11186
ARHGAP9	1.40876	7.83938	3.24317	0.00933802	0.0481224	-3.04769
USP5	1.40693	9.67028	6.46626	8.81e-05	0.00331651	1.75005
C3orf58	1.40693	7.1561	4.49836	0.00128086	0.0145309	-1.01456
GTSE1	1.40671	5.91757	5.03624	0.000583769	0.00933186	-0.202739
LOC100506409	1.40631	5.64534	3.70821	0.00437317	0.0299315	-2.27646
NAP1L1	1.40537	7.90252	5.74768	0.000220032	0.00548411	0.806043
RASSF5	1.40475	6.69928	4.6213	0.00106636	0.0131615	-0.825376
MFSD3	1.40334	9.96427	7.35258	3.11e-05	0.00200774	2.81659
MEGF8	1.40302	8.74804	4.68185	0.000975105	0.0124369	-0.732984
TMC4	1.40031	12.7203	4.85166	0.000760861	0.0107961	-0.47664
FERMT3	1.39957	6.46003	3.67895	0.00458381	0.0308401	-2.32453
SBF1	1.39879	10.0009	7.52093	2.58e-05	0.00183689	3.00773
LINC00204B	1.3962	5.85699	4.99123	0.000622443	0.00967465	-0.269065
FAM78A	1.39563	6.94999	3.85536	0.00345751	0.0259152	-2.03605
USP24	1.39499	11.1223	9.06259	5.31e-06	0.000786436	4.60569
TRAM1L1	1.39492	7.25055	4.75859	0.000871228	0.011738	-0.616617
MYO9A	1.39444	8.78821	6.49192	8.54e-05	0.00325839	1.78241
PSMC3IP	1.39272	8.17606	8.49395	9.27e-06	0.00105349	4.04665
CD36	1.39232	6.94474	3.75555	0.00405362	0.028564	-2.19889
UBAP1	1.38979	9.5431	6.31602	0.000106092	0.00370338	1.55875
HSPA8	1.3891	11.6235	4.69204	0.000960587	0.0123697	-0.717489
ZNF251	1.38893	6.50282	5.4457	0.000330038	0.00674597	0.386987
CANT1	1.38892	7.70037	3.81183	0.00370535	0.0269956	-2.10695
CD6	1.38795	6.96467	3.24439	0.00931909	0.0480577	-3.04564
GHRL	1.38655	7.86883	4.30232	0.0017233	0.0172881	-1.32048
CSRNP1	1.38652	8.73671	4.68309	0.000973316	0.0124368	-0.731086
KIF21B	1.38352	8.65443	7.1634	3.86e-05	0.00217349	2.59758
GAB1	1.38122	7.7557	3.72913	0.00422887	0.0292717	-2.24217
C6orf204	1.38091	6.82145	5.97815	0.000162841	0.00462818	1.11688
ELK1	1.38049	6.47824	3.96558	0.00290482	0.0234669	-1.85744
ZBTB22	1.38024	7.44556	9.91393	2.43e-06	0.00054987	5.38319
TNFRSF12A	1.37958	12.6183	5.13934	0.000504538	0.00853135	-0.0519103
CIAPIN1	1.3787	9.21975	7.3384	3.16e-05	0.00202114	2.80033
C5orf25	1.37793	10.6648	5.07687	0.000551058	0.00901656	-0.143113
TMEM178	1.37785	7.45856	4.94266	0.000667281	0.0100679	-0.340978
ADPRHL1	1.37543	10.1414	3.52361	0.00589369	0.0359629	-2.58085
TIGIT	1.37451	5.38168	4.37121	0.0015517	0.0162684	-1.21239
AGPAT6	1.37435	8.37872	3.68483	0.00454065	0.0306372	-2.31486
RND2	1.37217	8.29499	3.60758	0.00514315	0.0330583	-2.44204
HK3	1.37051	5.10801	4.36352	0.00156993	0.016401	-1.22443
SOCS1	1.3699	5.51083	3.91901	0.00312604	0.0244001	-1.93274
GPAA1	1.36592	9.09458	7.51193	2.61e-05	0.00184476	2.9976
H6PD	1.36542	5.70737	6.07404	0.000143976	0.00433664	1.24394
SEL1L3	1.36541	8.41687	4.00016	0.00275121	0.0226857	-1.80167
MTCH1	1.36528	11.9913	3.94918	0.0029808	0.0237643	-1.88393
SLC22A17	1.36344	13.3358	5.08652	0.000543586	0.008948	-0.128995
2018-09-11	1.36107	6.14801	6.24338	0.000116183	0.00389898	1.46512
CRIM1	1.35884	6.68631	3.4943	0.00618172	0.037047	-2.6294
GCLC	1.35744	11.0392	4.77852	0.000846239	0.0115484	-0.586548
PPP1CB	1.35706	8.18017	4.56881	0.00115285	0.0136894	-0.905889
ARHGEF26-AS1	1.35529	6.90843	5.0106	0.000605479	0.00956385	-0.240494
SUSD5	1.3544	5.96743	3.20861	0.00988793	0.0498602	-3.10548
ACO2	1.35345	11.8131	6.81814	5.77e-05	0.00268504	2.18595
C6orf145	1.35049	7.40964	3.79998	0.00377596	0.0272882	-2.12628
HIBADH	1.35015	11.061	6.40839	9.46e-05	0.00342648	1.67674
TANC1	1.35014	11.1728	6.06629	0.000145409	0.00436343	1.23372
MAP3K14	1.34731	10.2819	4.46814	0.00134033	0.0148606	-1.06138
CLYBL	1.34599	7.61447	3.87843	0.00333328	0.0253443	-1.99855
LRG1	1.34545	5.9793	3.98701	0.00280857	0.0229883	-1.82285
C1orf228	1.34188	8.46106	3.92231	0.00310979	0.024344	-1.92739
LOC100233156	1.3413	8.01153	3.5475	0.00566916	0.0351509	-2.54129
PDPK1	1.34125	9.07881	4.58877	0.00111912	0.0134544	-0.87523
RNF123	1.33927	9.30467	8.72839	7.34e-06	0.000926747	4.2812
FUT1	1.33835	10.7776	3.44605	0.00668835	0.0389481	-2.70949
REC8	1.33687	12.7975	3.71563	0.00432139	0.0297012	-2.26429
PRR24	1.33667	11.197	3.43026	0.00686335	0.0395853	-2.73574
BACH1	1.33507	9.24588	3.65894	0.00473388	0.0313747	-2.35742
CAPN10	1.3348	9.55239	6.60686	7.42e-05	0.00304375	1.92624
FAM193B	1.33382	8.91077	5.37973	0.000361216	0.00706847	0.293652
PER3	1.33369	8.40712	4.69139	0.000961507	0.0123697	-0.718477
EVI2B	1.3329	7.35081	3.66712	0.00467195	0.0311344	-2.34398
OTUB2	1.33238	4.84945	6.98981	4.71e-05	0.00241171	2.39256
MRFAP1	1.33204	13.1562	4.83571	0.000778665	0.0109455	-0.500545
ATP5G3	1.33016	7.30158	6.92871	5.06e-05	0.00250298	2.31947
PIK3R3	1.3299	6.24775	5.74048	0.000222135	0.00551953	0.796213
ST3GAL2	1.32978	9.26366	4.90892	0.000700462	0.0103017	-0.391146
ATP2B2	1.32867	6.14433	5.29593	0.000405467	0.00757958	0.174152
MED14	1.32797	3.95965	3.41088	0.00708467	0.0403106	-2.76797
EVI2A	1.32786	6.96385	4.07816	0.00243535	0.0210866	-1.67639
LOC100652876	1.32702	6.08541	5.85981	0.000189887	0.00505694	0.95824
SNX7	1.32597	11.6114	3.96137	0.00292412	0.0235117	-1.86424
SPC24	1.32417	5.26405	4.4628	0.00135114	0.0149407	-1.06967
LOC100506779	1.32412	6.43645	6.13977	0.000132417	0.00417333	1.33027
MPZL3	1.32399	9.43893	5.27682	0.00041635	0.00766499	0.146761
GRAMD1A	1.32356	6.99579	6.83603	5.64e-05	0.0026651	2.20767
PLXNA3	1.32341	7.16666	3.98277	0.00282734	0.0230587	-1.82969
PITHD1	1.32177	8.9027	4.10889	0.00232165	0.0204983	-1.62724
AP1B1	1.32023	8.34961	5.91258	0.00017727	0.0048514	1.02924
SEC22A	1.3202	8.46087	4.85668	0.000755348	0.0107616	-0.469124
ZNF135	1.31955	7.54829	5.62081	0.000260492	0.00597337	0.631614
TRIM50	1.3192	6.87711	4.58219	0.00113012	0.013522	-0.885335
CDKN2AIPNL	1.31885	10.0324	5.68765	0.000238261	0.00570704	0.723803
MXD4	1.31793	9.84017	7.29635	3.32e-05	0.00205154	2.75197
PLEKHM3	1.31761	10.2033	5.44158	0.000331898	0.00676691	0.381176
ATP8B3	1.31694	6.20535	4.04395	0.00256891	0.0217998	-1.73125
COQ6	1.31637	10.1986	7.37807	3.03e-05	0.00198165	2.84577
NAPA	1.31448	10.3943	5.65355	0.000249334	0.00583055	0.676859
RCCD1	1.31379	8.27754	4.22131	0.00195117	0.0185729	-1.44838
FLJ35424	1.31179	4.10034	4.57418	0.00114368	0.0136207	-0.897645
NR3C1	1.31051	9.39128	3.43248	0.00683847	0.0394741	-2.73205
MGC16703	1.30981	8.49761	5.39333	0.000354541	0.00703289	0.312938
ST3GAL3	1.30952	6.70171	4.93102	0.000678535	0.0101686	-0.358268
SMPD4	1.30924	8.94227	5.26454	0.00042351	0.00773624	0.129129
C9orf114	1.30906	7.45796	7.44651	2.8e-05	0.00192553	2.92367
TMEM223	1.30736	5.68002	5.55992	0.000282694	0.00623666	0.547069
DLG1	1.30703	9.4199	7.72454	2.07e-05	0.0016601	3.23426
SHKBP1	1.30685	7.96272	4.97501	0.000637049	0.00979588	-0.293044
ST6GALNAC1	1.30536	5.11225	3.27126	0.00891427	0.0466802	-3.00075
IFITM10	1.30535	6.17047	6.57663	7.7e-05	0.00310248	1.88859
NTN5	1.30389	9.58849	5.39629	0.000353104	0.00702022	0.317137
ZDHHC12	1.30302	7.91598	4.69842	0.000951611	0.0123013	-0.707791
BRD9	1.30282	9.42321	7.7749	1.96e-05	0.00159253	3.28952
NDUFA10	1.30268	8.12174	6.43457	9.16e-05	0.00338611	1.70996
RCL1	1.30254	10.4261	5.39211	0.000355132	0.00703568	0.311216
BTK	1.30214	5.2834	5.07681	0.000551105	0.00901656	-0.143201
ARAF	1.30115	9.08261	4.29511	0.00174239	0.017356	-1.33184
STEAP3	1.30063	7.89989	4.98684	0.00062636	0.00969956	-0.27555
TOM1L1	1.29782	7.08656	4.90342	0.00070603	0.0103297	-0.399331
C22orf39	1.29768	9.42654	5.9318	0.000172903	0.00479789	1.05499
ASB6	1.29745	9.81931	6.91342	5.15e-05	0.00252827	2.3011
PRKG2	1.29722	4.526	3.34522	0.00789108	0.0432852	-2.87731
CXorf69	1.29582	9.04914	4.76183	0.000867119	0.011712	-0.611733
TBC1D16	1.29404	6.55741	6.77087	6.1e-05	0.00275803	2.12836
CPSF3L	1.29403	7.24045	7.16899	3.83e-05	0.00216614	2.60411
PPP6R2	1.29334	7.47434	8.32968	1.09e-05	0.00115812	3.87879
GEN1	1.29327	6.12742	4.06661	0.00247961	0.0213135	-1.6949
ECHS1	1.2932	13.2081	4.64609	0.00102795	0.0128425	-0.78749
C2orf84	1.29254	7.62378	5.02454	0.000593565	0.00944832	-0.219945
ZNF93	1.29239	7.80565	6.06077	0.00014644	0.00436999	1.22643
RCAN2	1.29181	12.9368	4.00567	0.00272756	0.0225628	-1.7928
DVL1	1.29171	8.41915	5.24454	0.000435459	0.00786669	0.100356
DBNDD1	1.29135	7.51678	3.76247	0.00400906	0.0284054	-2.18758
ZNF423	1.29114	6.96063	4.90411	0.000705324	0.0103274	-0.398297
STXBP5	1.28882	8.95639	5.50376	0.000304987	0.00647302	0.468602
ARHGEF3	1.2885	11.1906	5.18118	0.000475751	0.00823861	0.00884276
BRPF3	1.28654	7.55567	6.63382	7.19e-05	0.00299117	1.95972
SETD1A	1.2848	7.73104	6.84654	5.58e-05	0.00264885	2.2204
SCG3	1.28432	10.4326	4.30522	0.00171568	0.0172347	-1.31592
PCSK7	1.28365	7.0415	6.54276	8.02e-05	0.00317088	1.84625
BCR	1.28099	10.0643	5.00972	0.000606235	0.00956505	-0.241785
SDHB	1.28062	11.8077	6.59031	7.57e-05	0.00307708	1.90564
NAT10	1.27994	9.80325	7.70212	2.12e-05	0.00167424	3.20955
POLR1D	1.27969	8.94549	6.3217	0.000105344	0.0036834	1.56604
TAF6L	1.27862	8.12131	6.12945	0.000134163	0.00419569	1.31676
PEAK1	1.27758	9.90416	5.74757	0.000220064	0.00548411	0.805892
TNFSF13B	1.27677	7.59251	3.67446	0.00461706	0.0309532	-2.33191
DISP2	1.2729	11.6366	4.64336	0.00103211	0.0128799	-0.79166
DHFR	1.27012	7.7773	3.52584	0.00587234	0.035896	-2.57715
CSGALNACT2	1.26997	8.82302	7.48694	2.68e-05	0.00187184	2.96942
FHDC1	1.26945	6.22557	3.75551	0.00405389	0.028564	-2.19895
GPR137	1.26868	8.19966	6.59264	7.55e-05	0.00307245	1.90854
URB2	1.26783	8.4996	3.61597	0.00507382	0.032792	-2.4282
STS	1.26688	5.84758	4.49059	0.00129588	0.014615	-1.02659
SH3BGRL2	1.26596	9.33946	5.10823	0.000527157	0.0087774	-0.0972605
CARD14	1.26423	6.08935	5.0136	0.000602892	0.0095403	-0.236067
C19orf51	1.26416	5.25817	4.92271	0.000686686	0.0102336	-0.370613
H1FX	1.26415	10.5253	5.00378	0.000611392	0.00960211	-0.250542
MAST4	1.26286	5.94612	6.3493	0.000101789	0.00360911	1.6014
CYP2J2	1.26205	7.25301	4.02646	0.00264014	0.0221513	-1.75935
TTC28	1.26197	9.19747	6.21391	0.00012057	0.00397289	1.42691
CBX4	1.26173	7.65635	4.3788	0.00153393	0.0161641	-1.20052
ZNF177	1.26105	9.67529	8.2942	1.13e-05	0.0011793	3.84214
LOC283588	1.26052	5.50751	4.6299	0.00105286	0.0130541	-0.812221
ITSN1	1.26035	7.19758	5.49754	0.00030757	0.00651315	0.459882
MED27	1.2588	8.68135	5.27865	0.000415293	0.00765678	0.149389
MCM2	1.2578	8.62298	3.81143	0.00370769	0.027001	-2.1076
SSBP3	1.25704	7.25891	4.61413	0.00107776	0.0132157	-0.836353
MASP1	1.2559	4.65927	3.29395	0.00858661	0.0455966	-2.96286
CENPH	1.25569	6.8953	3.76577	0.00398795	0.0283178	-2.18218
KLHL6	1.25467	6.31536	3.50872	0.00603821	0.0364716	-2.6055
C4orf43	1.25361	9.50276	6.13126	0.000133854	0.00419046	1.31914
WIPF1	1.2517	7.33316	3.78922	0.00384136	0.0276282	-2.14386
RECQL4	1.25115	8.78337	3.68663	0.00452754	0.0306059	-2.31191
ERF	1.25053	7.63526	3.22988	0.00954563	0.0486898	-3.06991
R3HDM2	1.25047	7.40649	7.96596	1.6e-05	0.0014308	3.49645
AES	1.24998	10.7153	4.99811	0.000616364	0.00964398	-0.258916
RIPPLY1	1.24979	4.46498	4.47917	0.0013183	0.0147258	-1.04428
MSR1	1.24953	7.0034	3.28527	0.00871042	0.0459581	-2.97735
NR6A1	1.24897	6.00738	5.25245	0.000430688	0.00781804	0.111748
LRPAP1	1.24837	6.53146	3.23755	0.00942521	0.048377	-3.05708
LYPLA2	1.24773	7.32762	6.10835	0.000137811	0.00425067	1.28909
DMXL2	1.24708	8.1839	7.65813	2.22e-05	0.00169928	3.16092
TMEM50A	1.24605	10.2596	6.78659	5.99e-05	0.00274399	2.14755
GALE	1.24531	7.8249	8.42331	9.95e-06	0.00110135	3.97483
FAM125A	1.24451	8.51588	6.38347	9.76e-05	0.00349999	1.64502
DCLK2	1.24282	9.55454	6.12397	0.0001351	0.00420022	1.30958
C19orf43	1.24062	6.93215	7.88302	1.74e-05	0.00151546	3.40714
DEF6	1.24012	8.62379	4.71678	0.000926281	0.0121553	-0.679922
SCN3A	1.23957	10.1378	4.92825	0.000681241	0.0101835	-0.362383
IL6ST	1.2392	7.44727	5.02695	0.000591536	0.00942044	-0.216406
CAMK4	1.23746	5.63047	3.50351	0.00608967	0.0366764	-2.61414
ARFGAP2	1.23705	8.93348	6.50449	8.41e-05	0.00324782	1.79823
LYSMD2	1.23622	12.866	5.67507	0.000242282	0.00576446	0.706507
SPSB3	1.23575	7.775	6.09987	0.000139307	0.00426537	1.27795
ATXN7L2	1.23559	10.19	4.30115	0.00172637	0.0172901	-1.32232
RBM23	1.23473	6.23141	5.27535	0.0004172	0.00767279	0.144653
PPP5C	1.23432	8.09689	7.02994	4.5e-05	0.00236114	2.44031
ALDOA	1.2343	14.3796	5.47072	0.000318983	0.00663534	0.422213
C4orf19	1.23142	4.87206	3.5294	0.00583839	0.0358074	-2.57125
KLHDC8B	1.23085	7.87706	3.73436	0.00419354	0.0291015	-2.23359
C9orf86	1.23049	12.7931	7.68103	2.17e-05	0.00168425	3.18627
C6orf89	1.23045	8.57554	5.02186	0.000595837	0.00946288	-0.223896
FMNL1	1.22906	7.77157	7.63203	2.29e-05	0.00173033	3.13195
FAM160A2	1.22776	12.3052	6.82378	5.73e-05	0.00267379	2.1928
KCNH2	1.22682	8.97368	5.3431	0.000379885	0.00729712	0.241544
ACOT11	1.22587	7.56646	5.10145	0.000532228	0.00883057	-0.10716
NEK8	1.22474	6.10872	5.1973	0.000465134	0.00817247	0.0321812
PPP2R1B	1.22429	7.68293	4.62323	0.00106332	0.0131516	-0.822422
RAB8B	1.22424	8.73132	5.21366	0.000454618	0.00806567	0.0558292
KCNC1	1.22398	5.83073	4.20513	0.0020004	0.0188565	-1.47403
NDUFS2	1.22383	11.0596	5.46284	0.00032242	0.00666631	0.411132
NLRP1	1.2231	6.82517	3.39239	0.00730272	0.0410949	-2.79873
PLEKHH3	1.22293	11.3969	8.08569	1.41e-05	0.00133812	3.62396
STX3	1.22292	9.26551	5.56558	0.000280548	0.00620655	0.554946
PLIN1	1.22257	4.81184	3.31396	0.00830791	0.0445946	-2.92946
DHPS	1.2222	10.4192	8.77635	7e-06	0.000900004	4.32847
FAM110B	1.22143	8.55814	4.54265	0.00119873	0.0140044	-0.94617
MT1G	1.2207	12.5167	3.46094	0.00652752	0.0383978	-2.68476
RELT	1.22051	6.49711	4.95196	0.000658433	0.00997859	-0.327179
SH3TC1	1.21966	6.22929	3.22519	0.00961997	0.0489387	-3.07774
KATNB1	1.21874	8.28582	7.34094	3.16e-05	0.00201943	2.80325
NFE4	1.21867	5.51287	5.19175	0.000468757	0.00819205	0.0241575
SERINC3	1.21847	10.4175	4.20934	0.00198748	0.018777	-1.46736
UNC119	1.21781	9.22302	4.86684	0.000744327	0.010666	-0.453931
SCAMP3	1.21768	10.5866	6.1416	0.000132108	0.00417333	1.33268
IGSF8	1.21763	9.32853	4.15289	0.00216847	0.0197482	-1.55704
PAFAH1B3	1.21749	10.8433	5.57908	0.000275494	0.00613785	0.573738
FANCD2	1.21565	5.5687	4.21867	0.00195913	0.0186026	-1.45257
VPS37B	1.21452	10.5342	3.6457	0.00483604	0.0318425	-2.37922
ST8SIA5	1.21336	9.17617	3.56359	0.00552304	0.034581	-2.51469
MLST8	1.21111	8.36487	7.096	4.17e-05	0.00227663	2.51844
ADAMTS9	1.21108	6.41919	3.60806	0.00513917	0.0330406	-2.44125
BCLAF1	1.2108	6.85625	6.41985	9.33e-05	0.00339828	1.69129
RACGAP1	1.21067	7.34747	3.3766	0.00749447	0.0417658	-2.82503
FADS3	1.21044	7.13857	4.13725	0.00222166	0.0199764	-1.58197
STAG3L4	1.21029	7.48327	6.01263	0.000155766	0.00452279	1.16272
TBC1D7	1.20972	9.87704	5.2242	0.000447978	0.00801643	0.0710441
LOC100507280	1.20913	6.5812	4.52689	0.00122729	0.0141665	-0.970471
TREML2	1.2084	5.39029	3.63906	0.00488815	0.0320465	-2.39016
ALDOAP2	1.20815	11.1293	5.68566	0.000238892	0.0057185	0.721071
C4orf46	1.20734	4.43913	3.7772	0.00391574	0.0279812	-2.16348
PDE8A	1.20651	6.91326	6.50577	8.39e-05	0.00324782	1.79984
KBTBD4	1.20613	7.65575	5.76135	0.000216094	0.00543623	0.8247
HIST1H2BK	1.20592	11.2191	3.85107	0.00348113	0.0259962	-2.04302
ANKRD13B	1.20567	7.32473	6.82656	5.71e-05	0.00267379	2.19617
TIGD2	1.20409	9.28483	3.4035	0.00717086	0.0406427	-2.78024
NS3BP	1.20318	7.39666	5.29485	0.000406073	0.00758103	0.172607
SSBP2	1.20061	9.13343	4.87527	0.000735311	0.010565	-0.441335
ADC	1.20028	7.80364	6.78313	6.01e-05	0.00274399	2.14332
EPB49	1.19901	8.22662	6.20151	0.000122467	0.00401432	1.41082
DECR1	1.1988	10.6151	3.85741	0.00344631	0.0258748	-2.03272
BTD	1.19812	7.83017	4.37612	0.00154019	0.0161982	-1.20471
LOC100505933	1.19677	5.28297	4.44971	0.00137804	0.0151271	-1.09
KCNC3	1.19651	10.6211	3.88904	0.00327775	0.0251001	-1.98133
C18orf10	1.19582	9.78188	5.4386	0.000333253	0.00678588	0.376965
HPX	1.19519	5.6132	4.71152	0.000933454	0.0122082	-0.687891
OXR1	1.19463	5.75264	3.37044	0.00757066	0.0420207	-2.83529
QARS	1.19455	8.86222	4.69699	0.000953616	0.0123177	-0.709966
CALD1	1.19359	4.54924	3.87697	0.00334101	0.0253701	-2.00092
APIP	1.19337	8.65578	4.56356	0.00116191	0.013758	-0.913972
MAPRE3	1.19331	9.00989	6.13331	0.000133506	0.00418578	1.32182
NCDN	1.19215	10.9076	4.34486	0.00161509	0.0166464	-1.25366
KDM6A	1.19138	9.80261	4.14167	0.0022065	0.0199017	-1.57492
FAM190A	1.1913	6.19334	3.48285	0.00629822	0.0374799	-2.6484
PEX2	1.18987	10.5017	5.33638	0.000383422	0.00734567	0.231959
ARHGAP33	1.18974	9.23402	4.96844	0.00064307	0.00983778	-0.302771
TMED4	1.18964	8.71813	3.9389	0.00302947	0.0239947	-1.90055
ORMDL1	1.18948	9.50272	4.58312	0.00112856	0.0135185	-0.883905
TMEM53	1.18854	9.60812	6.18405	0.000125196	0.00408243	1.3881
ARFRP1	1.18634	8.25415	6.12388	0.000135115	0.00420022	1.30947
SRRM2	1.18504	7.11628	6.15988	0.000129084	0.00413736	1.35656
PDE4D	1.18486	6.775	3.99649	0.00276711	0.0227598	-1.80758
MGAT4B	1.18464	9.04852	4.70565	0.00094154	0.0122426	-0.696801
SLC25A1	1.18453	10.7627	6.14074	0.000132252	0.00417333	1.33155
TXLNA	1.1843	7.53055	4.96855	0.000642969	0.00983778	-0.302607
APH1A	1.18385	7.07397	4.66856	0.000994392	0.0125863	-0.753213
SSH2	1.18346	6.20635	4.6988	0.000951069	0.0123013	-0.707203
ACACA	1.18224	6.8754	3.36637	0.00762146	0.0422193	-2.84207
USP54	1.1814	11.4814	4.54092	0.00120183	0.0140212	-0.948836
LOC285074	1.18053	10.1535	4.57665	0.00113948	0.0135988	-0.893845
AKT1	1.18006	6.85089	5.48998	0.000310741	0.00654713	0.449279
KCTD16	1.17989	6.14805	3.54254	0.00571502	0.0353505	-2.5495
SMYD2	1.17916	11.9027	3.71312	0.00433889	0.0297888	-2.26842
UBASH3B	1.17893	4.50955	3.90553	0.00319335	0.0247663	-1.95459
CDK14	1.17776	11.3632	3.56669	0.0054953	0.0344762	-2.50956
ITGA3	1.17768	9.69469	5.44892	0.000328594	0.00674076	0.391522
NPNT	1.17767	12.6229	3.84565	0.00351123	0.0261181	-2.05184
KCTD13	1.17709	6.77973	6.20428	0.000122042	0.00400735	1.4144
ZNF513	1.17589	9.67851	7.24216	3.53e-05	0.00211045	2.68931
ATG13	1.17558	10.2612	6.0834	0.000142265	0.00431382	1.25628
CADM2	1.17538	9.56316	4.14354	0.00220011	0.0198719	-1.57194
KLHL21	1.1739	6.05656	3.61373	0.00509226	0.0328677	-2.4319
PKM2	1.17384	12.2601	6.15126	0.0001305	0.00415459	1.34531
KDELC2	1.17279	6.47587	5.88197	0.000184475	0.00496393	0.988097
GBA2	1.17182	9.24271	6.17551	0.000126555	0.00409088	1.37697
C15orf29	1.1717	7.31571	5.28097	0.000413963	0.00763974	0.152707
PBX3	1.17131	10.2504	4.87738	0.000733062	0.0105448	-0.438169
MTBP	1.17104	5.26368	4.97396	0.000638006	0.00979924	-0.294596
TCF4	1.17036	6.8557	7.77417	1.96e-05	0.00159253	3.28872
LAIR1	1.17009	6.05631	3.27786	0.00881772	0.0463035	-2.98973
MED26	1.16996	6.25113	4.03704	0.00259681	0.021929	-1.74235
BCKDK	1.16982	8.66828	5.97265	0.000164001	0.00465061	1.10956
SDHD	1.16861	9.70925	4.44119	0.00139585	0.0152647	-1.10325
PLEC	1.16847	10.5703	3.62704	0.00498391	0.0324528	-2.40996
CROCCP2	1.16819	11.4024	3.40645	0.00713632	0.0405098	-2.77534
C3orf39	1.16774	9.65643	5.03724	0.00058294	0.00932258	-0.20127
PRMT1	1.16729	12.1632	7.6756	2.18e-05	0.00168425	3.18026
HIF1AN	1.16682	7.44029	6.35052	0.000101635	0.00360806	1.60296
ACACB	1.16654	6.47823	5.94809	0.000169292	0.004747	1.07678
RFC2	1.16564	8.29935	4.09126	0.00238618	0.0208141	-1.65542
TUBB4B	1.16551	14.9272	4.57661	0.00113954	0.0135988	-0.893903
PAPPA	1.16513	5.5561	3.93259	0.00305978	0.024118	-1.91076
TBL3	1.16465	6.96141	5.27765	0.000415874	0.00765998	0.147944
FBXL7	1.16465	10.7782	4.28662	0.00176516	0.0174568	-1.34521
TMCC2	1.16438	5.88413	5.81363	0.000201724	0.00523149	0.895783
OSGEPL1	1.16376	6.70247	5.68991	0.000237546	0.00569916	0.726906
SMAD2	1.16277	7.84503	7.18844	3.75e-05	0.00214664	2.62682
SNX17	1.16241	8.62719	4.36819	0.00155885	0.0163175	-1.21713
CHST4	1.16119	8.20292	4.01893	0.00267145	0.0223095	-1.77146
AKT3	1.16076	11.9682	4.89944	0.000710089	0.010381	-0.405257
GAS2L1	1.1585	5.95696	4.46706	0.00134251	0.0148716	-1.06306
LOC100505909	1.15808	5.43116	3.94379	0.00300619	0.0238858	-1.89264
OIP5	1.15765	6.25769	3.25599	0.00914202	0.0474568	-3.02625
CHD3	1.15761	8.08523	4.79896	0.000821396	0.0113386	-0.555758
PTPN9	1.15713	7.01559	4.35282	0.00159567	0.0165171	-1.24119
PGD	1.15659	10.5933	4.08926	0.00239361	0.0208644	-1.65862
ASNA1	1.1564	10.5131	7.21315	3.65e-05	0.00214664	2.65562
EME2	1.15611	8.99537	4.34404	0.00161712	0.0166496	-1.25496
GPR162	1.15606	8.79363	4.33583	0.00163746	0.0167576	-1.26784
SNX16	1.15556	6.6867	3.88809	0.00328269	0.0251277	-1.98287
CD300C	1.1553	5.29633	4.14739	0.00218704	0.0198597	-1.56582
PTPN13	1.15491	11.944	5.11864	0.00051947	0.00870333	-0.0820716
FANCM	1.15416	6.14217	3.9747	0.00286343	0.0232422	-1.84271
COX10	1.15389	6.59812	5.80675	0.000203557	0.00525366	0.886444
CD72	1.15321	5.52228	4.22148	0.00195067	0.0185729	-1.44812
SREBF2	1.15311	10.2612	6.26264	0.00011341	0.00384469	1.49002
KDM6B	1.15234	7.16633	5.5985	0.000268399	0.00607728	0.600707
RAD23A	1.15203	11.0275	7.05247	4.38e-05	0.00232633	2.46702
MRPL28	1.15145	11.7969	5.12515	0.000514726	0.00866548	-0.0725835
PSMD9	1.15076	5.5179	4.24924	0.00186921	0.0180726	-1.4042
CIRBP	1.15018	11.6747	4.17914	0.00208224	0.0193039	-1.51529
PFKM	1.15013	13.8449	5.78935	0.000208267	0.0053061	0.86281
SHCBP1	1.14916	5.22532	3.24178	0.00935952	0.048161	-3.05002
MAZ	1.14856	7.72489	5.64181	0.000253274	0.00588315	0.660655
ATP2C1	1.14776	9.79169	4.94816	0.000662032	0.010021	-0.332815
ACOX3	1.14699	6.29655	3.67724	0.00459638	0.0308805	-2.32732
NPAS1	1.14622	6.14047	4.03801	0.00259285	0.021929	-1.74078
GSTO2	1.14616	10.3985	6.17219	0.000127087	0.00410146	1.37263
MCAM	1.14595	9.08419	3.94066	0.00302109	0.0239737	-1.89771
NCF4	1.14502	5.63962	4.35881	0.0015812	0.0164457	-1.2318
RGS19	1.14416	6.76247	4.9182	0.000691157	0.0102475	-0.377322
NUP155	1.14293	8.42812	5.28458	0.000411894	0.00762023	0.157889
FLOT2	1.14266	5.75742	5.72847	0.000225697	0.00557773	0.77978
TTC31	1.14192	7.89773	6.23794	0.00011698	0.0039098	1.45807
ZNF738	1.141	5.83464	4.24289	0.00188751	0.0182027	-1.41423
ADI1	1.14059	11.4353	4.22741	0.00193297	0.0184754	-1.43873
DCAF10	1.14056	9.3328	3.34116	0.00794402	0.0434281	-2.88409
TYK2	1.14047	7.95708	5.7158	0.000229516	0.00562651	0.762441
CLASP2	1.13816	9.59752	6.87741	5.38e-05	0.00259021	2.25772
HAUS5	1.13779	6.28648	5.00609	0.000609378	0.00958249	-0.247131
KIF11	1.13772	6.98334	3.62486	0.00500144	0.0325107	-2.41354
PTCRA	1.13521	6.45653	4.51028	0.00125819	0.0143821	-0.996134
CASP14L	1.13467	4.80978	3.27884	0.00880341	0.0462735	-2.98809
PEA15	1.13456	10.2397	4.50279	0.00127238	0.0144878	-1.00771
KIAA1383	1.13382	6.95609	5.53583	0.000292034	0.00629396	0.513466
CA11	1.13306	11.3386	3.73913	0.00416163	0.0289915	-2.22578
PARP6	1.13176	12.1006	7.19787	3.71e-05	0.00214664	2.63782
DBF4B	1.1309	7.94143	5.10171	0.000532036	0.00883057	-0.106787
ATAT1	1.1298	6.50765	4.48383	0.00130911	0.0146743	-1.03706
SPAG9	1.129	9.19417	3.92915	0.00307641	0.0241984	-1.91632
SKA3	1.1289	5.62628	3.30614	0.00841565	0.0449576	-2.9425
TRIM74	1.12884	8.27737	6.7466	6.28e-05	0.0027898	2.09869
C17orf101	1.12878	9.84254	4.53531	0.00121194	0.0140974	-0.957479
SMARCD2	1.12869	9.32243	4.57045	0.00115004	0.0136617	-0.90337
LOC401127	1.12746	7.64402	5.0439	0.000577446	0.00927315	-0.191478
OXTR	1.12577	5.47848	5.46648	0.000320826	0.00665162	0.416256
XAGE2B	1.1254	4.57397	4.23103	0.00192222	0.0184114	-1.43299
CD70	1.12537	4.73303	3.80067	0.00377184	0.0272846	-2.12516
C8orf73	1.12494	9.73414	4.7677	0.00085971	0.0116538	-0.602867
XRCC2	1.12441	5.78176	4.44322	0.00139158	0.0152268	-1.10009
ZCCHC4	1.12418	6.69507	4.53044	0.00122079	0.0141477	-0.96499
PAK1	1.12326	8.59707	6.12713	0.000134559	0.00419813	1.31372
PXDNL	1.12311	4.62856	4.67769	0.000981101	0.012481	-0.739315
GSTCD	1.12227	8.33049	4.48495	0.0013069	0.0146671	-1.03532
FBXL6	1.12222	8.50626	7.21272	3.65e-05	0.00214664	2.65511
JKAMP	1.12178	8.81517	5.32154	0.000391357	0.0074041	0.210779
CYHR1	1.12177	8.74093	6.14541	0.000131472	0.00417333	1.33766
SPATS2	1.12168	7.74084	5.8075	0.000203355	0.00525205	0.887469
FARP2	1.12136	7.51929	4.7397	0.00089566	0.0119179	-0.645193
EFHA2	1.12118	10.9405	6.23244	0.000117791	0.00391909	1.45095
HIST1H2AJ	1.12101	10.5892	3.2847	0.00871862	0.0459949	-2.9783
REEP3	1.1203	6.4593	4.00194	0.00274356	0.0226553	-1.79881
GFER	1.11969	7.67643	3.80436	0.00374973	0.0271716	-2.11914
ATP5A1	1.11891	14.762	5.82389	0.000199027	0.0052013	0.909686
PEX11A	1.11785	8.03111	4.43612	0.00140657	0.0153196	-1.11114
TBC1D2	1.11723	7.77258	4.33024	0.00165145	0.0168549	-1.27661
GPT	1.11631	8.91543	4.37989	0.00153141	0.0161511	-1.19882
ZNF76	1.11494	8.61087	7.21398	3.64e-05	0.00214664	2.65658
FAM107B	1.11414	11.7443	5.40893	0.000347046	0.00694682	0.335032
ZNF706	1.11172	9.36833	5.27546	0.00041714	0.00767279	0.1448
SLC25A4	1.11054	13.4174	3.91978	0.00312226	0.0243757	-1.9315
CBFB	1.11042	10.2531	7.15282	3.91e-05	0.00219013	2.58518
MAN2B2	1.11024	9.04457	3.63903	0.00488831	0.0320465	-2.39019
SLC48A1	1.10971	11.4632	4.51214	0.00125468	0.014355	-0.993249
LOC158402	1.10966	6.16622	5.28663	0.000410725	0.0076163	0.160826
STK36	1.10944	8.84669	6.29497	0.000108915	0.00376352	1.53169
COG8	1.10937	7.64254	6.95023	4.94e-05	0.00246053	2.34528
PSD	1.10867	8.71374	6.07518	0.000143767	0.00433664	1.24544
TNFRSF8	1.10754	5.28113	4.38022	0.00153066	0.0161511	-1.19831
MAPK8IP2	1.10608	11.3059	6.49493	8.51e-05	0.00325688	1.78619
ANAPC1	1.10496	8.829	4.99396	0.000620022	0.00967128	-0.265034
STOML2	1.10481	10.0913	5.81239	0.000202055	0.00523644	0.894093
GTF2IRD1	1.10271	8.17242	5.90396	0.000179268	0.00489703	1.01766
TECR	1.10222	12.3287	6.13975	0.00013242	0.00417333	1.33025
WBP2	1.10033	7.78142	4.76655	0.000861161	0.0116608	-0.604609
PCDHB6	1.10015	5.54391	4.3308	0.00165004	0.016849	-1.27572
LPHN1	1.10011	10.2906	6.32631	0.000104742	0.00366985	1.57195
C5AR1	1.10008	6.60823	5.4844	0.000313105	0.00657149	0.441444
PSAP	1.09998	11.991	3.53589	0.00577714	0.0355683	-2.56051
ENTPD4	1.09995	8.28701	3.66952	0.00465391	0.0310581	-2.34003
HAGHL	1.09993	9.1458	5.19611	0.000465906	0.00817725	0.0304668
CHD1L	1.09964	11.1017	6.69891	6.64e-05	0.00286426	2.04014
RABL3	1.09959	6.8485	3.22298	0.00965531	0.0490191	-3.08144
METTL22	1.09951	6.74623	6.29743	0.000108581	0.00376234	1.53486
ZC3H12D	1.09871	5.20906	4.22058	0.00195335	0.0185784	-1.44953
CBX8	1.09847	6.63571	3.95953	0.0029326	0.0235273	-1.8672
BCL7B	1.09836	7.1534	5.40701	0.000347955	0.00694987	0.332326
BMF	1.09802	6.97721	4.03653	0.00259888	0.0219371	-1.74317
INPP5E	1.09782	6.76969	7.62359	2.31e-05	0.00173282	3.12257
NT5C3	1.09754	10.9506	5.38668	0.00035779	0.00704563	0.303504
FECH	1.09583	7.46668	4.22046	0.00195374	0.0185784	-1.44973
METTL13	1.09582	7.64031	4.48453	0.00130773	0.0146671	-1.03598
ACVR1	1.09534	9.7459	4.39543	0.00149578	0.0159	-1.17455
VWA5A	1.09382	7.29326	3.65269	0.00478178	0.0315737	-2.3677
CELSR2	1.09353	8.80582	5.47106	0.000318836	0.00663534	0.42269
WBP4	1.09293	7.48772	4.02138	0.00266122	0.0222537	-1.76752
2018-09-05	1.09264	8.32028	3.22332	0.00964985	0.0490191	-3.08087
URM1	1.09237	6.9998	4.85881	0.000753022	0.0107402	-0.465937
CDAN1	1.09206	8.63607	5.91328	0.000177111	0.0048514	1.03016
TCEB1	1.09204	8.98401	5.79023	0.000208024	0.00530348	0.864019
GAPDH	1.09202	14.893	6.97147	4.82e-05	0.00243216	2.37068
TOR3A	1.09147	8.20395	4.72513	0.000914988	0.0120684	-0.66725
UNC80	1.09069	9.43489	5.99877	0.00015857	0.00456971	1.14431
SPTB	1.09052	6.84022	3.94573	0.00299702	0.023838	-1.8895
FAM173B	1.09008	7.39842	4.67889	0.000979372	0.0124788	-0.737493
CLASRP	1.08905	10.1057	5.4314	0.000336543	0.00682451	0.366807
OTX1	1.08848	4.54068	5.22267	0.000448937	0.00801643	0.0688336
LGMN	1.08741	9.05844	4.5871	0.0011219	0.0134578	-0.877795
SORT1	1.08721	11.4517	5.06759	0.000558354	0.00909168	-0.156714
TMEM199	1.08701	8.32816	4.07071	0.00246381	0.0212466	-1.68833
MLX	1.08656	9.33842	6.11054	0.000137427	0.00424231	1.29197
CHUK	1.08611	7.10364	4.23703	0.00190457	0.0182969	-1.42349
RFESD	1.08606	7.66882	4.72552	0.000914475	0.0120684	-0.66667
EIF4H	1.08547	10.6127	3.76353	0.00400226	0.0283786	-2.18584
DDX5	1.08491	15.2249	5.67195	0.00024329	0.00576446	0.702218
LOC100506012	1.0835	6.19076	4.27405	0.00179945	0.0176797	-1.36502
BRMS1L	1.08216	8.48356	3.41966	0.00698346	0.0400268	-2.75335
POLQ	1.08197	4.98334	3.46303	0.00650529	0.0382969	-2.68129
TPMT	1.08152	6.15668	4.40157	0.00148193	0.0157841	-1.16496
PHF19	1.08111	9.64735	3.91196	0.00316107	0.024597	-1.94417
USP19	1.08025	7.34867	4.48524	0.00130634	0.0146671	-1.03488
CYP27A1	1.07927	8.56216	4.27829	0.00178781	0.0175941	-1.35834
MYO1H	1.079	4.28206	3.37146	0.00755799	0.0419975	-2.83359
PRUNE	1.0788	6.73439	6.17899	0.000126	0.00409088	1.3815
HIST1H2BN	1.07834	11.009	4.41634	0.00144919	0.0155637	-1.14192
TONSL	1.07811	5.78831	5.74258	0.000221521	0.00550948	0.799073
PGS1	1.07785	6.85997	5.34541	0.000378681	0.00728774	0.244827
HIP1	1.07595	8.46507	3.39682	0.00724991	0.040906	-2.79137
GPR84	1.07576	5.4333	5.06154	0.000563161	0.0091462	-0.165577
ALOX12	1.07524	5.09129	4.6521	0.00101885	0.0127713	-0.778311
AS3MT	1.07467	7.37343	4.49234	0.00129247	0.0145966	-1.02387
DBNL	1.0744	9.54438	5.65455	0.000249003	0.00583055	0.678232
KIAA0090	1.07423	7.09098	5.53432	0.000292633	0.00629965	0.511348
ARHGAP24	1.07353	9.15157	3.3264	0.00813943	0.0440804	-2.90871
LRRN2	1.07282	12.3993	4.69935	0.000950307	0.0122971	-0.706375
BIN2	1.07256	6.03752	4.344	0.00161722	0.0166496	-1.25502
C6orf64	1.07234	8.81981	3.9519	0.00296805	0.0237154	-1.87954
GSK3B	1.07144	8.10929	6.97735	4.78e-05	0.00242087	2.3777
ACRBP	1.07121	7.02234	4.45671	0.00136359	0.0150202	-1.07913
CDK5RAP1	1.07107	7.91763	6.15155	0.000130452	0.00415459	1.34569
STAU2	1.07071	9.46029	3.98338	0.00282464	0.0230508	-1.82871
KY	1.07033	7.00904	4.75132	0.000880542	0.0117986	-0.627604
MSTO1	1.07032	7.02627	3.72111	0.0042836	0.0295115	-2.25531
ADIPOR1	1.0702	11.4795	5.88406	0.000183973	0.00496393	0.990915
UQCC	1.07017	8.92923	5.1933	0.000467745	0.00819205	0.0263925
LYRM7	1.07009	7.05877	3.2489	0.00924983	0.0478317	-3.0381
CNTN1	1.07005	12.2995	4.91248	0.000696872	0.0102917	-0.385834
MARS	1.06954	8.9989	4.47872	0.00131918	0.0147258	-1.04497
C12orf70	1.06913	5.94511	3.37127	0.00756035	0.0420041	-2.83391
CARKD	1.06901	6.94581	5.53669	0.000291695	0.00629396	0.514668
CCBL1	1.06874	8.76838	4.36825	0.00155871	0.0163175	-1.21703
SLC26A10	1.06868	8.96022	3.22343	0.00964808	0.0490191	-3.08069
MAP4	1.06836	8.10469	4.70525	0.00094209	0.0122455	-0.697405
ABCA7	1.0679	10.8226	3.31372	0.00831112	0.0445988	-2.92985
TOP3B	1.0672	7.35824	6.09693	0.00013983	0.00427443	1.27408
TRIO	1.06671	7.73465	3.85357	0.00346736	0.0259345	-2.03896
TCF19	1.06636	4.91585	3.72148	0.00428104	0.0295072	-2.2547
ADD3	1.06616	11.6287	4.41113	0.00146065	0.0156602	-1.15005
KIAA0368	1.06489	7.93478	6.16104	0.000128893	0.00413491	1.35808
TM7SF2	1.06376	9.9368	5.17938	0.000476951	0.0082556	0.00623648
COX4I1	1.06286	10.477	3.83005	0.00359939	0.0264955	-2.07724
SLC38A10	1.06285	7.79661	4.27048	0.00180931	0.0177396	-1.37066
AP3M1	1.06203	9.76188	3.53683	0.00576832	0.0355353	-2.55895
CTC1	1.06182	9.10428	5.35831	0.00037201	0.0071899	0.263204
PRDX3	1.06166	10.6518	3.22315	0.00965256	0.0490191	-3.08116
LRCH1	1.06155	9.50265	6.95581	4.9e-05	0.00245495	2.35196
FCHSD2	1.06152	10.1773	5.95216	0.000168404	0.00473051	1.08221
PIK3C2B	1.05927	10.19	5.43128	0.000336601	0.00682451	0.36663
TCEB3	1.05741	9.9517	7.42819	2.86e-05	0.00194008	2.90287
RAD18	1.05685	6.54339	4.78769	0.000834988	0.0114604	-0.572717
DDX41	1.05579	10.5734	6.33233	0.000103959	0.00364923	1.57967
IL5RA	1.05497	5.82735	5.8312	0.000197128	0.00517651	0.919587
CYTH2	1.05452	9.97465	5.84478	0.000193655	0.00512103	0.937948
ARHGEF12	1.05437	7.61272	5.95976	0.000166756	0.00469687	1.09236
MAST2	1.05431	10.4849	3.26649	0.00898487	0.0469236	-3.00872
SHMT1	1.05419	6.56923	4.48468	0.00130743	0.0146671	-1.03574
LPP	1.05395	6.68962	4.08306	0.00241685	0.0209746	-1.66855
DKFZP434I0714	1.05338	7.4851	3.31818	0.00825027	0.0444145	-2.92241
G6PC3	1.05274	9.22531	4.37671	0.00153882	0.0161974	-1.2038
MAPK10	1.05202	9.60783	4.30265	0.00172243	0.017284	-1.31996
ABCA3	1.05202	10.9758	5.74904	0.000219637	0.00548191	0.8079
PDXP	1.05198	10.1467	4.21965	0.00195616	0.0185884	-1.45101
FAM117B	1.05186	10.8874	3.74753	0.004106	0.0287668	-2.21202
SH2B1	1.05176	9.4963	6.98378	4.75e-05	0.00241984	2.38537
MRPL38	1.05167	9.39717	7.52404	2.57e-05	0.00183689	3.01123
CIC	1.04915	11.382	6.01263	0.000155768	0.00452279	1.16272
GSG2	1.04902	5.16437	3.828	0.00361118	0.026546	-2.08059
ANAPC2	1.04883	7.24492	6.27981	0.000110999	0.00380408	1.51216
CYB5R4	1.04865	8.152	4.26683	0.00181946	0.0177881	-1.37642
KIAA0913	1.04826	7.59105	6.96868	4.83e-05	0.00243683	2.36734
STIM1	1.0481	9.85643	4.9079	0.000701492	0.0103017	-0.392665
CDA	1.04798	6.46803	4.47782	0.00132096	0.014737	-1.04637
FAM82A1	1.04658	8.96035	6.15704	0.000129547	0.00413825	1.35287
SNUPN	1.04624	8.32484	5.19494	0.000466674	0.00818691	0.0287635
GTPBP2	1.04572	6.95763	5.18477	0.000473362	0.00822219	0.014048
ACOT1	1.0453	11.484	4.74778	0.000885127	0.0118405	-0.63297
RICTOR	1.04529	7.57318	5.54674	0.000287766	0.00626656	0.528688
SLC9B1	1.04447	5.94741	5.29746	0.000404611	0.00756734	0.176338
C9orf91	1.04412	9.5225	4.07625	0.00244263	0.0211399	-1.67946
C9orf5	1.04403	7.13935	3.70264	0.00441248	0.0300855	-2.28561
PEX19	1.04317	11.5629	5.5456	0.000288206	0.00627253	0.527107
CISD2	1.04139	6.95448	4.09469	0.00237347	0.0207399	-1.64993
NFATC3	1.03979	8.44126	4.68958	0.000964071	0.0123731	-0.721228
L3MBTL2	1.0392	8.38399	6.09402	0.00014035	0.00428683	1.27026
KBTBD3	1.03898	6.12475	4.08732	0.00240084	0.0208887	-1.66172
LOC388152	1.03889	8.85612	5.75331	0.000218401	0.00547165	0.813731
DENR	1.03873	8.32641	3.51683	0.00595905	0.0362085	-2.59207
GRHPR	1.03869	11.5443	6.20017	0.000122675	0.00401764	1.40907
IMMP2L	1.03851	8.17411	4.14763	0.00218621	0.0198597	-1.56542
KAT6B	1.03782	8.92911	4.34684	0.00161023	0.0166117	-1.25056
COQ9	1.03771	10.9912	5.55277	0.000285432	0.00624585	0.537104
SLC2A4RG	1.03752	7.4126	4.61725	0.00107278	0.0131881	-0.831575
SLC27A4	1.03715	7.54467	4.51603	0.00124739	0.0143151	-0.987236
C2orf61	1.03705	5.77383	3.61243	0.00510296	0.0328978	-2.43404
OGDHL	1.03679	13.5571	3.75278	0.00407167	0.0286173	-2.20343
OXA1L	1.03448	10.7776	7.06683	4.31e-05	0.00231807	2.48401
PNPLA2	1.0338	9.84147	5.00799	0.000607737	0.00957766	-0.244342
SNAI3	1.03378	5.7335	4.70223	0.000946284	0.0122746	-0.701993
RTKN2	1.03345	5.08002	3.81137	0.00370805	0.027001	-2.1077
GSTZ1	1.03318	9.2063	3.44283	0.00672362	0.0390327	-2.71484
SETDB1	1.03316	8.47553	7.0893	4.2e-05	0.00228432	2.51053
PXN	1.03312	7.00939	3.51882	0.00593973	0.0361371	-2.58877
NRXN1	1.03228	8.14147	3.58223	0.00535859	0.0338897	-2.48388
SLC8A1	1.03094	6.31835	4.53276	0.00121656	0.014138	-0.961411
GNB2	1.03063	11.869	5.89189	0.000182106	0.00493983	1.00145
MED23	1.03014	7.31331	3.56536	0.00550714	0.0345159	-2.51175
C1orf122	1.02958	14.5118	4.60056	0.00109968	0.0133515	-0.857146
HDAC3	1.02914	8.53579	6.24167	0.000116432	0.00390147	1.46291
CCDC138	1.02899	5.67007	4.65418	0.00101572	0.0127519	-0.775134
GPATCH8	1.02795	9.88055	7.40268	2.94e-05	0.00196452	2.87385
NPLOC4	1.02779	10.694	4.63664	0.00104242	0.0129716	-0.801925
TPCN2	1.02777	6.66119	4.74082	0.000894193	0.011914	-0.643499
FAM190B	1.02739	10.7111	5.08549	0.000544379	0.00895154	-0.130503
NDFIP2	1.02709	8.52597	5.46964	0.00031945	0.00663914	0.4207
HIST1H2BE	1.02708	9.87554	4.62214	0.00106504	0.0131615	-0.824092
CALM3	1.02626	11.7367	7.38995	2.99e-05	0.00197109	2.85933
IPCEF1	1.02602	5.03669	4.78249	0.000841347	0.0115127	-0.580557
GATAD2A	1.02545	8.65594	4.3609	0.0015762	0.0164164	-1.22854
DCK	1.02508	8.70533	4.09676	0.00236585	0.0206943	-1.64663
C14orf1	1.02502	10.4859	3.9094	0.0031739	0.0246662	-1.94832
SOX6	1.02492	7.57752	3.40981	0.00709715	0.0403454	-2.76975
WHSC1	1.02267	9.81677	4.16652	0.00212323	0.01953	-1.53535
TNKS1BP1	1.02252	7.56592	4.14367	0.00219966	0.0198719	-1.57173
POLR2E	1.02233	9.14602	5.08086	0.000547953	0.00898451	-0.137269
ME2	1.022	10.4697	5.42264	0.000340594	0.00686478	0.354437
TADA2B	1.02135	7.36966	3.33733	0.00799425	0.0436166	-2.89048
DNAH6	1.02059	5.52057	3.82454	0.00363112	0.0266813	-2.08623
CHAC2	1.01996	7.01762	3.83518	0.00357016	0.0263628	-2.06889
PI3	1.01956	6.74266	4.33759	0.00163308	0.0167342	-1.26508
ASB1	1.01936	8.89685	3.62898	0.00496829	0.0324071	-2.40675
PRR3	1.01802	7.78146	5.0069	0.000608675	0.00958249	-0.245937
NPDC1	1.01795	15.1785	5.97504	0.000163496	0.0046398	1.11274
SPNS3	1.01768	6.67916	6.02702	0.000152914	0.00447098	1.1818
EPS15L1	1.01729	7.52044	5.64103	0.000253537	0.00588562	0.659583
ANKRD16	1.01652	9.6814	5.61969	0.000260882	0.00597864	0.630066
MRPL46	1.01642	10.2017	5.66713	0.000244859	0.00578045	0.695575
PSKH1	1.0153	10.9065	4.64819	0.00102475	0.0128196	-0.784274
ZNF134	1.01491	8.73806	4.25656	0.00184831	0.0179582	-1.39262
SCMH1	1.01452	9.3736	7.65394	2.23e-05	0.0017021	3.15628
CENPO	1.01359	7.67744	4.27824	0.00178793	0.0175941	-1.35841
ELK3	1.01327	5.956	3.76253	0.00400868	0.0284054	-2.18748
SNAP25	1.01249	10.5327	4.1565	0.00215639	0.0197097	-1.55129
SRGAP2	1.01248	11.2287	5.68032	0.000240593	0.00574268	0.713736
C10orf81	1.01201	4.75266	3.6474	0.00482281	0.0317888	-2.37642
CAMSAP1	1.01068	8.1416	3.50358	0.00608894	0.0366764	-2.61402
APC	1.0104	5.91935	4.89986	0.000709659	0.0103787	-0.404631
SIN3A	1.00985	8.00875	4.29961	0.00173046	0.0173184	-1.32475
TRIM37	1.00929	9.40121	4.15764	0.00215261	0.0196991	-1.54949
BTG1	1.00797	11.9279	4.40718	0.0014694	0.0157084	-1.15621
NCR1	1.00732	4.26242	3.21216	0.00982983	0.0496558	-3.09953
DHX35	1.0066	10.1344	4.45664	0.00136372	0.0150202	-1.07923
BBIP1	1.00616	7.25885	3.4745	0.00638463	0.0377644	-2.66225
PCBP2	1.00574	10.2366	6.38843	9.7e-05	0.00348856	1.65133
CD47	1.00564	11.2583	3.42672	0.00690322	0.0397199	-2.74162
UCKL1	1.00554	8.70213	5.05824	0.000565806	0.00916543	-0.170423
UBR4	1.00486	6.84043	3.44587	0.00669031	0.0389535	-2.70979
COBLL1	1.00482	7.05391	3.80521	0.00374461	0.0271503	-2.11775
CCDC24	1.00406	8.88837	5.88167	0.000184548	0.00496393	0.987693
SNAP23	1.00399	6.74684	4.8842	0.000725884	0.010494	-0.427997
CCNT2	1.00388	6.76352	3.83088	0.00359464	0.0264735	-2.07589
TUBGCP6	1.00339	10.4081	6.50864	8.36e-05	0.0032451	1.80345
SMG8	1.0023	9.22804	5.47128	0.000318741	0.00663534	0.422998
BTBD9	1.00212	11.2855	4.59555	0.0011079	0.0134053	-0.864833
SAE1	1.001	6.99018	4.64323	0.00103231	0.0128799	-0.791861
VPS52	1.00047	9.07761	7.01211	4.59e-05	0.00238053	2.41912
RALGAPA2	1.00031	10.3654	4.5239	0.0012328	0.0142167	-0.975092
PPP2R5A	-1.00052	8.47143	-3.63194	0.00494459	0.0323141	-2.40187
CCDC104	-1.00093	12.9625	-5.42614	0.000338968	0.00684302	0.359382
PLA2G3	-1.0019	4.85669	-3.70497	0.004396	0.0300112	-2.28179
PLA2G16	-1.00195	13.0065	-5.14417	0.000501122	0.00849472	-0.0448861
OXCT2	-1.00229	7.51527	-5.00294	0.000612129	0.00960568	-0.251789
ZNF667	-1.00235	9.14744	-4.68876	0.000965223	0.0123799	-0.722462
C11orf9	-1.00243	9.5588	-3.63084	0.00495337	0.0323491	-2.40369
NME2	-1.00349	14.8133	-3.73601	0.00418246	0.0290637	-2.23088
CCDC75	-1.00354	7.85345	-4.38368	0.00152264	0.0160947	-1.1929
ADCYAP1R1	-1.00395	6.45768	-4.97197	0.000639829	0.00981123	-0.297546
KIF13B	-1.00529	12.0356	-5.89091	0.000182339	0.00493983	1.00013
C20orf3	-1.00577	13.4528	-5.69974	0.000234463	0.00569006	0.740406
GCC2	-1.00628	9.59393	-4.37537	0.00154195	0.0162115	-1.20589
PAPLN	-1.00647	4.17644	-3.62333	0.00501389	0.0325673	-2.41608
CSNK1A1L	-1.00745	6.84944	-5.51846	0.000298974	0.00639562	0.489189
DOCK7	-1.00748	9.0073	-3.43011	0.00686511	0.0395853	-2.73599
GNG5	-1.00877	10.6704	-4.49202	0.0012931	0.0145992	-1.02437
DNAJB4	-1.0091	8.4323	-4.00449	0.00273258	0.0225944	-1.79469
FBXO31	-1.00911	9.04124	-3.46394	0.00649569	0.0382704	-2.67979
NBEAL1	-1.00967	7.8731	-4.47732	0.00132196	0.0147437	-1.04714
RPS21	-1.01035	14.5156	-4.62027	0.001068	0.0131637	-0.826962
AMN	-1.01197	9.33654	-3.5153	0.00597391	0.036272	-2.59461
GNPNAT1	-1.01235	8.71938	-3.33665	0.00800322	0.0436449	-2.89161
TRIM69	-1.01319	8.50618	-3.81347	0.00369569	0.0269513	-2.10428
SPINK7	-1.01516	9.9788	-5.03201	0.000587292	0.00937227	-0.208961
PRKAR2B	-1.01573	9.97461	-3.48351	0.00629144	0.037454	-2.6473
SKIL	-1.01608	7.76937	-4.72897	0.00090986	0.0120462	-0.661443
LOC100294362	-1.01666	6.97713	-3.96175	0.00292236	0.0235025	-1.86362
CMIP	-1.01786	10.026	-4.04852	0.00255064	0.0217075	-1.72392
MLEC	-1.01839	12.3985	-3.26183	0.00905432	0.0471642	-3.01651
EIF4EBP1	-1.01883	9.03715	-4.53224	0.00121751	0.014138	-0.962214
IGF2BP3	-1.02082	7.41925	-3.29222	0.00861116	0.0456724	-2.96575
NEUROG1	-1.02093	9.05909	-7.08966	4.2e-05	0.00228432	2.51097
LOC100131138	-1.02138	7.02049	-4.83497	0.000779496	0.0109472	-0.501648
GALK2	-1.02345	10.0374	-5.31344	0.000395763	0.00745469	0.199201
FAM156A	-1.02389	13.2124	-3.48266	0.00630022	0.0374826	-2.64872
ZNF323	-1.0239	7.00632	-3.31101	0.00834834	0.0447059	-2.93437
ZNF292	-1.02438	10.6218	-3.41313	0.00705857	0.0402446	-2.76422
PGM5	-1.02528	5.84225	-3.21696	0.00975197	0.0494081	-3.0915
ZNF614	-1.02551	7.14992	-4.81489	0.000802565	0.0111699	-0.53179
2018-09-08	-1.02579	9.36013	-5.99955	0.00015841	0.00456971	1.14536
IQCG	-1.02699	7.41314	-4.1977	0.00202343	0.0189796	-1.48581
SELK	-1.02717	13.5533	-4.58903	0.00111869	0.0134536	-0.874834
SCFD2	-1.02796	9.42467	-4.99595	0.000618263	0.00965855	-0.262097
PROM2	-1.02807	5.30155	-4.11208	0.00231015	0.020463	-1.62213
TCEA1	-1.02893	8.84804	-4.26024	0.00183794	0.0178901	-1.38682
PNPLA7	-1.02948	8.03777	-4.91649	0.000692861	0.0102584	-0.379868
HM13	-1.03014	8.67335	-5.02232	0.000595444	0.00946223	-0.223214
GYG2	-1.03135	6.3045	-3.90021	0.00322034	0.0248382	-1.96321
INE1	-1.03136	12.5855	-6.2448	0.000115976	0.0038966	1.46695
HSD17B12	-1.03149	7.39979	-3.8802	0.00332398	0.025315	-1.99569
LOC100509196	-1.0329	7.49987	-5.37505	0.000363547	0.00708935	0.287
TNXB	-1.03319	11.0057	-6.06284	0.000146052	0.00436878	1.22917
LOC401431	-1.03627	10.5504	-4.81548	0.000801882	0.0111699	-0.53091
TSPAN10	-1.03647	12.6157	-7.94678	1.63e-05	0.00143956	3.47586
ACADM	-1.03667	9.95058	-4.42618	0.00142782	0.015426	-1.1266
DPEP3	-1.03716	9.95588	-3.59921	0.0052133	0.0333577	-2.45586
WDR67	-1.03858	8.40962	-4.68823	0.00096599	0.0123799	-0.723282
TH	-1.03941	4.53431	-3.66957	0.00465349	0.0310581	-2.33993
ATP8B2	-1.04094	10.3937	-3.82032	0.0036556	0.0267939	-2.09311
CREB3L4	-1.04238	9.82164	-3.88183	0.00331538	0.02527	-1.99303
ACBD5	-1.04368	3.98354	-4.65852	0.00100924	0.0126973	-0.768519
LOC100271840	-1.04389	5.04593	-5.28815	0.00040986	0.00761255	0.163007
EXOC3L1	-1.04459	7.476	-3.60315	0.00518017	0.0332169	-2.44936
KCTD1	-1.04655	10.4741	-3.58873	0.00530244	0.0337039	-2.47314
LOC100506668	-1.04739	7.89327	-3.36396	0.00765171	0.0423682	-2.84609
CNPY2	-1.04775	12.2969	-4.61933	0.00106949	0.0131721	-0.828398
UCA1	-1.04942	5.58044	-3.71359	0.0043356	0.0297717	-2.26765
SYN1	-1.04984	11.9626	-5.43756	0.000333723	0.00678941	0.375507
HIST1H3E	-1.0502	10.4963	-5.5908	0.000271191	0.00608521	0.590011
GPC2	-1.05063	7.33206	-3.45403	0.00660172	0.0386409	-2.69624
LOXL4	-1.05155	6.63286	-3.41692	0.00701488	0.0401321	-2.75791
TRO	-1.05174	12.5046	-3.27698	0.00883048	0.0463579	-2.99119
CREB3L2	-1.05245	8.22913	-4.2589	0.0018417	0.0179171	-1.38893
FAM8A1	-1.05258	7.16185	-6.40462	9.51e-05	0.00343257	1.67194
LCE2C	-1.0526	9.09955	-5.45436	0.000326167	0.00671781	0.399185
FLJ23867	-1.05265	9.21547	-4.82679	0.000788808	0.0110427	-0.513921
MICAL3	-1.05423	7.92909	-6.56458	7.81e-05	0.00312528	1.87355
SOX17	-1.05581	10.7504	-6.86781	5.44e-05	0.00260961	2.24613
FOXK1	-1.05652	7.75402	-4.9965	0.000617776	0.00965855	-0.261283
AVP	-1.05702	7.00067	-3.3755	0.00750801	0.0417907	-2.82686
VSIG10	-1.05816	7.8203	-3.90043	0.00321922	0.0248382	-1.96286
AGMAT	-1.05821	5.44608	-3.21025	0.00986111	0.0497618	-3.10274
STX2	-1.05875	9.26069	-4.48222	0.00131226	0.0146948	-1.03955
WDR19	-1.05895	6.28457	-3.39272	0.00729883	0.0410852	-2.79819
UFM1	-1.06121	9.73373	-5.71028	0.000231204	0.00564949	0.754869
LOC100506075	-1.06138	9.42003	-3.76692	0.0039806	0.0282889	-2.18029
CTAGE1	-1.06186	5.7063	-4.49788	0.00128178	0.0145325	-1.0153
PAWR	-1.0629	10.5636	-3.92622	0.00309068	0.0242498	-1.92107
ZNF302	-1.06299	9.65271	-5.02139	0.000596239	0.00946288	-0.224594
AVPI1	-1.06318	9.54382	-4.605	0.00109246	0.0133002	-0.850341
XIAP	-1.06328	9.32904	-3.89923	0.00322532	0.0248656	-1.9648
KIAA1324	-1.06394	10.7774	-3.34078	0.00794897	0.0434327	-2.88472
LOC100507153	-1.06452	11.0341	-5.85515	0.000191047	0.00506987	0.951953
LOC349196	-1.06457	8.33355	-3.29436	0.00858071	0.045574	-2.96216
PABPC1L	-1.06544	9.62545	-3.37503	0.00751385	0.041814	-2.82765
EAF2	-1.06562	8.0747	-3.25347	0.0091803	0.0475833	-3.03048
RPL36A	-1.06571	14.4926	-4.4569	0.0013632	0.0150202	-1.07883
CCBE1	-1.06611	4.00773	-3.89685	0.00323747	0.024898	-1.96865
NXT1	-1.06702	10.8232	-5.55181	0.000285802	0.00624585	0.535767
SLC9A2	-1.06853	4.14815	-4.99308	0.000620802	0.00967465	-0.266335
SMARCA2	-1.06929	9.45586	-3.23467	0.00947028	0.0484919	-3.0619
PIAS4	-1.06939	4.94294	-4.84266	0.000770847	0.0108681	-0.490117
AKAP1	-1.07114	11.7794	-3.89639	0.00323987	0.0249022	-1.96941
BPNT1	-1.0714	5.11943	-5.20337	0.000461202	0.0081479	0.0409599
KIAA1407	-1.0715	10.4116	-4.71972	0.000922283	0.0121249	-0.675454
LOC100652791	-1.07234	10.3175	-4.73405	0.0009031	0.0119745	-0.65374
FSHR	-1.07422	5.11395	-4.11235	0.00230918	0.020463	-1.6217
FLVCR1	-1.07802	9.486	-5.73581	0.000223512	0.0055424	0.789828
OR2A20P	-1.07823	5.71871	-3.75593	0.00405119	0.028564	-2.19827
NRP1	-1.0808	7.10852	-3.99855	0.00275816	0.0227011	-1.80426
MAGI2-AS3	-1.08098	9.67373	-3.32943	0.00809886	0.0439579	-2.90365
HNRNPA1	-1.08122	8.4803	-4.05778	0.00251401	0.0215152	-1.70906
FBXO16	-1.08303	10.47	-3.86157	0.0034236	0.0257886	-2.02595
ATP13A2	-1.0831	10.6181	-5.0506	0.000571974	0.00922168	-0.181634
XAGE3	-1.08334	5.49526	-4.75812	0.000871836	0.011742	-0.617339
RCAN1	-1.08357	9.43968	-3.44041	0.00675031	0.0391273	-2.71886
KIF1C	-1.08403	11.6338	-3.51742	0.00595326	0.036185	-2.59108
RPL7	-1.08428	14.8461	-5.69597	0.000235638	0.00569916	0.73524
ZNF507	-1.08438	6.72651	-5.98808	0.00016077	0.00459709	1.13009
PLD3	-1.08512	13.5332	-4.40889	0.00146561	0.0156902	-1.15354
BACH2	-1.08524	5.75187	-3.89128	0.00326617	0.0250519	-1.9777
C16orf93	-1.08548	11.4541	-4.32781	0.00165758	0.0168854	-1.28042
WIPI1	-1.08762	10.1719	-4.24217	0.0018896	0.0182089	-1.41537
LOC100289361	-1.08799	11.1333	-5.29132	0.000408062	0.00759166	0.167554
LOC541472	-1.08827	9.53527	-5.53863	0.000290931	0.00628947	0.517379
LOC728640	-1.08914	9.40764	-5.79024	0.000208023	0.00530348	0.864022
TBC1D10A	-1.08948	9.03796	-3.66378	0.00469712	0.0312394	-2.34946
CEP70	-1.09017	7.66343	-3.60752	0.00514368	0.0330583	-2.44215
SNHG13	-1.09275	9.71426	-4.55637	0.00117442	0.0138407	-0.925025
MDH1B	-1.09349	7.50957	-3.67791	0.00459147	0.0308586	-2.32623
LOC729080	-1.09411	6.83377	-7.66376	2.21e-05	0.00169579	3.16716
DUSP18	-1.09457	10.9028	-4.05529	0.00252379	0.0215743	-1.71305
SAT2	-1.09461	14.322	-4.93608	0.000673623	0.0101151	-0.350757
FLJ43681	-1.095	12.9295	-6.02272	0.000153761	0.00448181	1.1761
GABARAPL3	-1.09591	8.55704	-3.4422	0.00673058	0.039049	-2.71589
AXIN2	-1.09636	6.78525	-4.43016	0.00141926	0.0153776	-1.1204
EIF2AK3	-1.09658	7.62718	-4.93713	0.000672599	0.0101151	-0.349185
SSTR3	-1.09884	8.6759	-4.08845	0.00239664	0.0208763	-1.65992
RPLP0P2	-1.09933	14.6143	-4.26629	0.00182096	0.0177981	-1.37726
LOC100506686	-1.10053	7.10286	-3.49084	0.00621668	0.0371754	-2.63514
RYR3	-1.10211	5.08413	-4.01507	0.00268766	0.0223636	-1.77767
FBN3	-1.10256	7.79715	-5.1249	0.000514909	0.00866548	-0.072951
TNFAIP8L1	-1.10316	6.27442	-6.47235	8.74e-05	0.00331455	1.75773
LOC90499	-1.10329	9.53818	-5.96565	0.000165492	0.00467877	1.10022
EPHX3	-1.10352	10.5153	-4.37709	0.00153794	0.0161926	-1.2032
LOC728855	-1.10378	10.6244	-4.59197	0.00111381	0.0134366	-0.870323
CARD9	-1.10404	9.42841	-6.17927	0.000125954	0.00409088	1.38187
PYY2	-1.10415	11.3827	-3.3391	0.00797102	0.0435088	-2.88753
CYP4F30P	-1.1056	9.61371	-4.04563	0.00256218	0.021769	-1.72856
SRPK3	-1.10851	8.39712	-3.87708	0.00334042	0.0253701	-2.00074
C1orf93	-1.10942	9.12374	-3.63491	0.00492097	0.0321989	-2.39699
NLE1	-1.11074	8.31112	-4.29411	0.00174507	0.017356	-1.33342
CRHR2	-1.11103	11.3974	-6.68125	6.79e-05	0.00290229	2.01838
CNOT6L	-1.1119	9.67893	-4.58811	0.00112023	0.0134575	-0.876252
LOC100130741	-1.11232	6.15635	-4.53934	0.00120467	0.0140346	-0.95127
C4orf26	-1.11303	5.20221	-4.57197	0.00114745	0.0136468	-0.90104
KLK7	-1.1151	4.42494	-5.42535	0.000339336	0.0068431	0.358261
SPEF1	-1.11576	9.90003	-4.25388	0.00185594	0.0179951	-1.39686
P2RX7	-1.11643	7.39747	-3.23781	0.00942118	0.048377	-3.05665
ZNF331	-1.11681	11.3214	-4.35338	0.0015943	0.0165171	-1.24031
PIP5K1C	-1.11682	9.78104	-6.74618	6.28e-05	0.0027898	2.09817
SYT11	-1.11707	8.70748	-3.25395	0.00917298	0.047565	-3.02967
SNORA78	-1.11711	12.0123	-5.95245	0.000168341	0.00473051	1.0826
BTN2A1	-1.121	7.40785	-6.72745	6.42e-05	0.00281673	2.07522
ATG9B	-1.12162	5.88525	-3.30652	0.00841045	0.0449568	-2.94188
WWC3	-1.12317	11.4654	-3.92036	0.00311939	0.0243757	-1.93055
RPL9	-1.12362	13.2402	-5.26723	0.00042193	0.00771489	0.132993
KRTDAP	-1.12551	5.21031	-3.33466	0.00802938	0.0437258	-2.89492
CDC14A	-1.12653	5.60861	-3.72372	0.00426568	0.0294257	-2.25103
PLAC1	-1.12667	4.65049	-3.54307	0.00571015	0.0353409	-2.54863
DFFB	-1.12704	4.8284	-6.51941	8.26e-05	0.00321654	1.81698
LMBRD2	-1.12877	6.7209	-3.61816	0.00505593	0.0327381	-2.4246
ENO3	-1.12882	8.4594	-3.86985	0.00337896	0.0255681	-2.0125
MST1P2	-1.12956	10.7885	-3.39005	0.00733088	0.0412275	-2.80264
LOC389199	-1.13022	10.234	-3.21045	0.00985782	0.0497519	-3.1024
C20orf108	-1.13058	11.7011	-4.0197	0.00266822	0.0222974	-1.77021
FBXO15	-1.13194	9.46268	-3.75618	0.00404959	0.028564	-2.19787
ATAD3C	-1.13219	10.301	-4.41016	0.00146281	0.015678	-1.15157
BEND7	-1.13304	6.56393	-5.67294	0.000242971	0.00576446	0.703572
CASC4	-1.13391	10.5848	-4.42867	0.00142246	0.0153947	-1.12273
C9orf163	-1.13439	9.4819	-4.38481	0.00152003	0.0160788	-1.19113
CDKL2	-1.13459	9.33863	-3.89848	0.00322916	0.0248806	-1.96602
USP36	-1.13519	4.77666	-4.50347	0.0012711	0.0144812	-1.00666
C12orf29	-1.13607	9.13457	-8.15782	1.31e-05	0.00127171	3.69999
C10orf118	-1.13661	9.59226	-4.96771	0.000643741	0.00983778	-0.303849
MKL2	-1.13802	10.6183	-5.58131	0.00027467	0.00612942	0.576833
PPAPDC1B	-1.13868	7.7628	-4.23512	0.00191017	0.0183414	-1.42652
MYH14	-1.13901	8.69193	-7.39703	2.96e-05	0.00196674	2.86741
DBNDD2	-1.13989	11.0311	-5.35546	0.000373475	0.00721052	0.259139
ARCN1	-1.13993	8.51541	-3.81635	0.00367873	0.0268849	-2.09957
HSPA13	-1.14054	11.1524	-5.40408	0.000349355	0.0069647	0.328176
GPR180	-1.14089	8.59949	-4.87386	0.000736802	0.010579	-0.443429
ZNRF1	-1.14089	7.93655	-5.53833	0.000291048	0.00628947	0.516962
LOC100507494	-1.14263	6.9959	-3.54701	0.00567364	0.0351729	-2.5421
C6orf26	-1.14278	8.99308	-5.08774	0.000542641	0.0089442	-0.127197
MAN1A2	-1.1429	8.37825	-3.83707	0.00355944	0.026314	-2.06581
GRIN1	-1.14357	11.0179	-7.05678	4.36e-05	0.00232413	2.47212
DENND2C	-1.14508	5.95021	-3.38988	0.00733286	0.0412275	-2.80291
CD274	-1.14552	8.38869	-4.474	0.00132858	0.0147738	-1.0523
MST1	-1.14677	11.4643	-3.65567	0.00475887	0.0314665	-2.3628
RPSA	-1.14735	12.2183	-5.79943	0.000205523	0.00527733	0.876513
OLFM2	-1.14931	6.1275	-6.66617	6.91e-05	0.00292162	1.99975
DPY19L3	-1.15075	7.88318	-3.91566	0.00314266	0.0244993	-1.93818
LOXHD1	-1.15352	6.1043	-5.26667	0.000422258	0.00771713	0.13219
STARD10	-1.15377	8.28933	-5.39189	0.000355243	0.00703568	0.310894
AGAP7	-1.15559	8.10424	-5.74657	0.000220355	0.00548589	0.804525
UBXN10	-1.1582	8.23296	-3.69037	0.00450034	0.030487	-2.30575
SLC2A9	-1.15861	6.5828	-4.25463	0.00185379	0.0179836	-1.39567
SLC46A1	-1.15863	7.98822	-4.97767	0.000634633	0.00978472	-0.289117
REST	-1.15934	5.17069	-3.39614	0.00725795	0.0409347	-2.79249
LYPD3	-1.15975	8.17792	-3.21113	0.00984667	0.0497022	-3.10126
RYBP	-1.1602	10.73	-4.10987	0.00231812	0.0204957	-1.62567
MEIS3P1	-1.16238	10.2561	-3.83392	0.00357733	0.0263899	-2.07095
NDNL2	-1.16384	11.244	-7.12517	4.03e-05	0.00223708	2.55275
FLJ42875	-1.16467	6.19922	-5.29091	0.000408294	0.00759166	0.166965
CBR1	-1.16501	10.0227	-3.33306	0.00805066	0.0438291	-2.8976
B4GALT5	-1.16605	10.0329	-5.29343	0.000406872	0.00758701	0.170574
GBA3	-1.16641	5.05112	-3.23538	0.00945907	0.0484806	-3.06071
ATP13A4	-1.16715	5.00258	-4.6869	0.000967878	0.0123924	-0.7253
UBXN4	-1.16749	9.78797	-5.23485	0.000441374	0.00793546	0.0864028
DOC2A	-1.16782	6.18334	-4.35177	0.00159822	0.0165223	-1.24284
ITPK1	-1.16821	11.6524	-5.44628	0.00032978	0.00674585	0.387798
RPL31	-1.16911	9.88932	-6.25261	0.000114845	0.00386305	1.47706
ARRDC3	-1.16945	6.33928	-4.30779	0.00170897	0.017204	-1.31188
GFRA3	-1.17068	6.38776	-4.05998	0.0025054	0.02147	-1.70553
KCNQ3	-1.17347	6.95929	-4.90726	0.000702131	0.0103017	-0.393607
SLITRK3	-1.17573	4.38719	-3.3027	0.00846357	0.0451127	-2.94825
PNLDC1	-1.17587	4.71387	-3.27583	0.00884727	0.0464068	-2.99312
TMEM177	-1.17658	10.7317	-4.68824	0.000965969	0.0123799	-0.72326
LGALS8	-1.17738	8.5867	-4.71342	0.000930853	0.0121964	-0.685008
KIAA0825	-1.17952	6.56108	-3.77661	0.00391946	0.0279927	-2.16445
RGS3	-1.18203	9.49488	-3.72196	0.00427775	0.0294928	-2.25391
RBM38	-1.18329	6.21949	-5.51348	0.000300998	0.00641808	0.482212
CEACAM1	-1.18413	6.71313	-3.93634	0.00304172	0.0240411	-1.90469
TXLNG	-1.18488	9.50654	-3.45577	0.00658298	0.0385585	-2.69336
CPNE7	-1.18595	8.38246	-4.30793	0.00170861	0.017204	-1.31166
LOC728323	-1.18598	11.9842	-5.37198	0.000365085	0.00710349	0.282635
C12orf68	-1.18598	5.16697	-5.14345	0.000501629	0.00849518	-0.0459301
FCN3	-1.18705	6.80664	-3.38538	0.00738721	0.0414237	-2.81041
BBC3	-1.18916	8.13685	-3.24177	0.0093596	0.048161	-3.05002
DRAM1	-1.18946	9.26032	-3.74858	0.0040991	0.0287377	-2.2103
TCF12	-1.18974	9.14666	-3.92733	0.00308524	0.0242269	-1.91926
KRTAP1-3	-1.19073	11.0715	-4.57646	0.0011398	0.0135988	-0.894136
UGGT2	-1.19308	9.42989	-5.79312	0.000207237	0.00530137	0.867936
SRSF8	-1.1934	9.9956	-4.85511	0.000757069	0.0107707	-0.471475
ANKRD2	-1.19342	8.989	-4.84835	0.000764514	0.0108109	-0.48159
LOC145694	-1.19351	8.41307	-5.89816	0.000180627	0.00491112	1.00987
APOL1	-1.1936	9.8189	-3.24797	0.00926418	0.0478886	-3.03967
MAP9	-1.1939	10.0401	-6.4495	8.99e-05	0.00335083	1.72887
DGKH	-1.19536	8.90376	-8.91348	6.13e-06	0.000847562	4.46232
C5orf24	-1.19538	11.9558	-4.93935	0.000670465	0.0100999	-0.3459
DCAF12L1	-1.19603	4.59508	-4.3491	0.00160472	0.0165713	-1.24702
OBP2A	-1.19626	4.08079	-4.4111	0.00146073	0.0156602	-1.1501
LOC100134167	-1.19704	5.07003	-4.98474	0.000628248	0.00971281	-0.278662
GLTPD1	-1.20202	14.0862	-3.68852	0.00451375	0.030549	-2.30879
WNK4	-1.20255	5.53823	-3.92186	0.00311199	0.0243471	-1.92812
LRRC8D	-1.20304	10.5685	-4.7198	0.000922172	0.0121249	-0.67533
LOC727869	-1.2034	5.46339	-3.29196	0.00861486	0.0456724	-2.96618
SNX29	-1.20431	9.57319	-5.216	0.000453137	0.00805838	0.0592041
CTBS	-1.20439	10.0951	-5.73114	0.0002249	0.00556775	0.783435
C20orf141	-1.20704	10.8142	-5.56476	0.000280858	0.00620957	0.553805
SELV	-1.20719	4.78771	-3.39706	0.00724705	0.0408978	-2.79097
N4BP2	-1.20926	8.61308	-4.15349	0.00216646	0.0197442	-1.55609
LZTFL1	-1.20948	10.0579	-4.95335	0.000657127	0.00996683	-0.325126
KCNV1	-1.21003	4.59057	-4.43239	0.00141449	0.0153685	-1.11693
AP3B1	-1.21016	11.2042	-4.71163	0.0009333	0.0122082	-0.687721
FOXB1	-1.21034	9.35142	-7.67407	2.18e-05	0.00168425	3.17857
AATK	-1.21052	9.97959	-4.85635	0.000755705	0.0107616	-0.469612
CLMN	-1.21237	8.63947	-3.26964	0.00893817	0.0467793	-3.00345
EVX1	-1.21252	10.4248	-5.28615	0.000410998	0.0076163	0.160141
CLRN3	-1.2128	4.66692	-3.21551	0.00977553	0.0494929	-3.09394
TMEM33	-1.2147	7.26242	-7.25591	3.47e-05	0.00209427	2.70524
CCDC81	-1.21505	6.1049	-4.09844	0.00235966	0.0206771	-1.64393
SULT1A2	-1.21588	11.0067	-3.75871	0.00403321	0.0285013	-2.19372
EXTL1	-1.21716	6.78557	-3.54228	0.00571742	0.0353511	-2.54993
TBX3	-1.21766	5.1472	-3.54158	0.00572397	0.03538	-2.55109
BHLHE23	-1.22276	11.4833	-4.03064	0.00262293	0.0220691	-1.75263
PER2	-1.22283	9.60058	-5.85413	0.000191302	0.00507307	0.950573
ZNF503	-1.22341	8.99802	-3.36972	0.00757968	0.0420373	-2.83649
GNG7	-1.22358	9.95961	-4.54875	0.00118786	0.0139424	-0.936769
ORMDL3	-1.22373	13.55	-8.30551	1.12e-05	0.00117194	3.85384
SHROOM2	-1.22549	7.8371	-3.60086	0.00519938	0.0332913	-2.45313
GOPC	-1.22601	8.0934	-4.89681	0.000712791	0.0103963	-0.409183
LOC100506317	-1.22623	4.84612	-4.54691	0.00119112	0.0139545	-0.939599
LOC100652974	-1.22635	9.18451	-6.00634	0.000157033	0.00455065	1.15437
RPS7	-1.22815	12.7346	-7.34085	3.16e-05	0.00201943	2.80315
C20orf201	-1.22871	10.2454	-5.82562	0.000198576	0.00519638	0.912033
CYP7B1	-1.22882	7.23298	-4.04342	0.00257102	0.0218086	-1.7321
SPRED1	-1.22986	5.31092	-3.7641	0.00399861	0.028358	-2.18491
HS3ST3B1	-1.23023	4.33699	-3.41587	0.00702702	0.0401498	-2.75967
BAG1	-1.232	13.8788	-6.70649	6.58e-05	0.0028623	2.04946
MYO5A	-1.23306	10.3818	-5.06105	0.000563552	0.00914647	-0.166295
PTPRJ	-1.2338	9.86933	-5.61253	0.000263396	0.00601171	0.620155
MPST	-1.23392	9.67657	-6.9471	4.95e-05	0.00246592	2.34152
CACNA1I	-1.23549	5.09778	-3.39163	0.0073119	0.0411342	-2.80001
LOC375196	-1.23639	5.91138	-6.12655	0.000134657	0.00419813	1.31297
MARCKS	-1.2368	12.4473	-4.05413	0.00252837	0.0216086	-1.71491
MDK	-1.23699	14.2965	-3.67154	0.00463881	0.0310326	-2.33671
DLGAP4	-1.23802	10.1586	-3.66967	0.0046528	0.0310581	-2.33978
HCG18	-1.2381	9.7878	-7.19328	3.73e-05	0.00214664	2.63247
RPL23AP7	-1.23908	10.2976	-6.45869	8.89e-05	0.00333275	1.74049
CTRB1	-1.24038	5.14476	-6.52328	8.22e-05	0.00320749	1.82183
C17orf76-AS1	-1.24292	13.7701	-6.56456	7.81e-05	0.00312528	1.87352
CNTNAP3	-1.24381	5.21986	-4.07446	0.00244943	0.0211841	-1.68231
LOC284242	-1.24458	4.01184	-4.52988	0.00122181	0.014151	-0.96585
CCDC146	-1.24512	9.45575	-4.50036	0.00127702	0.0145028	-1.01146
CCDC96	-1.24732	10.3673	-5.65349	0.000249354	0.00583055	0.676776
SLC6A20	-1.24894	5.56562	-4.26845	0.00181494	0.0177716	-1.37385
CBR3	-1.24905	5.84921	-3.60546	0.0051608	0.0331403	-2.44553
CACNA1E	-1.24963	10.1552	-4.72154	0.00091982	0.0121193	-0.672691
FBRSL1	-1.24964	12.7478	-3.88376	0.00330527	0.0252338	-1.9899
ZNF483	-1.2502	8.29077	-4.29423	0.00174474	0.017356	-1.33322
AQP2	-1.25054	10.2279	-7.78257	1.94e-05	0.00159058	3.2979
KLHL5	-1.2514	6.23027	-3.24307	0.00933947	0.0481233	-3.04785
GSTP1	-1.2516	15.7969	-3.45757	0.00656365	0.0385137	-2.69037
LOC401397	-1.25447	11.5465	-5.78453	0.000209591	0.00532865	0.856264
ZNF275	-1.2563	11.7266	-5.76659	0.000214605	0.00541229	0.831844
ZNF575	-1.25713	10.9802	-4.53883	0.00120558	0.0140409	-0.952053
FAM108C1	-1.25778	10.4105	-4.3233	0.00166901	0.0169514	-1.2875
BTC	-1.25787	7.22044	-7.5382	2.53e-05	0.00181945	3.02713
C11orf92	-1.25839	7.5819	-3.59658	0.00523549	0.0334221	-2.46019
BRP44L	-1.25853	11.7395	-5.00635	0.000609153	0.00958249	-0.246749
ITPR1	-1.26004	12.0938	-5.0407	0.000580076	0.00929104	-0.196178
RPL13AP3	-1.26016	12.8844	-3.41984	0.00698143	0.040023	-2.75306
C6orf225	-1.2614	12.4611	-6.49562	8.5e-05	0.00325688	1.78707
RPL12	-1.26147	13.5274	-5.03332	0.000586194	0.00935871	-0.207026
PRSS8	-1.26262	7.55844	-3.31339	0.0083157	0.0446001	-2.93041
ANKRD20A5P	-1.26418	7.66636	-3.67795	0.0045912	0.0308586	-2.32617
HGFAC	-1.26633	5.35757	-4.9091	0.000700279	0.0103017	-0.390876
POF1B	-1.26754	4.09794	-3.51974	0.00593086	0.0361013	-2.58724
GCNT2	-1.26762	4.09593	-9.00173	5.63e-06	0.000805093	4.54744
SYCE1L	-1.2688	13.9299	-6.352	0.000101449	0.00360806	1.60484
FAM3C	-1.26883	10.3579	-6.48428	8.62e-05	0.00327478	1.77279
SOX8	-1.26959	8.73881	-6.37128	9.91e-05	0.00353974	1.62947
XYLT1	-1.26981	5.99006	-3.50225	0.00610222	0.0367168	-2.61623
ZBTB10	-1.26993	7.29082	-5.65989	0.000247234	0.005811	0.685599
TIFA	-1.27016	7.70006	-3.20855	0.00988892	0.0498602	-3.10558
ZIM2	-1.2707	8.87716	-6.27538	0.000111615	0.003809	1.50646
PRR7	-1.27484	10.6978	-4.42295	0.0014348	0.0154571	-1.13163
FAM84A	-1.27498	6.37129	-3.37011	0.00757481	0.0420289	-2.83584
IFFO2	-1.27664	10.138	-4.14887	0.00218204	0.0198381	-1.56346
LEMD1	-1.27684	4.84719	-3.55951	0.00555971	0.0347009	-2.52143
FAM178A	-1.27707	10.2492	-6.6795	6.8e-05	0.0029051	2.01622
CYP2U1	-1.27812	9.77557	-4.79408	0.000827248	0.0113943	-0.563094
KRTAP10-10	-1.27823	7.89784	-6.51274	8.32e-05	0.00323557	1.8086
ANXA2	-1.27918	4.73804	-3.922	0.00311135	0.0243471	-1.92791
CEACAM19	-1.27927	9.78077	-3.96568	0.00290434	0.0234669	-1.85727
GLS2	-1.28081	9.35888	-3.65747	0.00474508	0.0314306	-2.35984
ARF3	-1.28235	11.461	-6.69008	6.72e-05	0.00288812	2.02926
A4GALT	-1.2834	6.48802	-3.71119	0.00435235	0.029854	-2.27159
QSOX2	-1.28366	6.37126	-4.14426	0.00219765	0.0198719	-1.57079
LRRC39	-1.28541	6.00281	-3.75784	0.00403885	0.0285251	-2.19515
MEIS2	-1.28655	9.78586	-3.56934	0.00547171	0.0344085	-2.50517
LOC393078	-1.28834	9.003	-4.93672	0.000673002	0.0101151	-0.349804
SNORD114-3	-1.28981	5.06519	-3.98557	0.00281493	0.0230123	-1.82517
C11orf74	-1.29032	10.2042	-6.38176	9.78e-05	0.00350404	1.64285
LOC100506029	-1.29221	9.09937	-6.17584	0.000126502	0.00409088	1.37739
C16orf11	-1.29329	9.23741	-4.93633	0.000673381	0.0101151	-0.350386
DSG2	-1.29417	5.08007	-4.16832	0.00211735	0.0194902	-1.5325
C3orf25	-1.29745	8.31793	-4.12472	0.00226527	0.0202044	-1.60196
AP1AR	-1.29772	6.83729	-5.33391	0.00038473	0.00734893	0.228439
DDX6	-1.29787	9.28284	-4.07195	0.00245906	0.0212284	-1.68635
MANF	-1.29812	12.9816	-4.24402	0.00188423	0.0181884	-1.41244
C8orf68	-1.30013	5.54871	-5.18745	0.000471592	0.00821448	0.0179221
MINA	-1.3018	8.46215	-5.67583	0.000242039	0.00576446	0.707546
LOC442421	-1.30236	10.6719	-7.65825	2.22e-05	0.00169928	3.16105
LINC00304	-1.30241	13.182	-4.45395	0.00136927	0.0150484	-1.08342
MPP1	-1.30387	10.5916	-4.53153	0.00121881	0.014138	-0.963315
HIST1H3J	-1.30404	7.50471	-6.25883	0.000113953	0.00385616	1.48509
SLC2A4	-1.3065	5.13621	-4.41478	0.00145262	0.0155954	-1.14436
C9orf135	-1.308	7.64937	-3.26868	0.00895234	0.0468274	-3.00506
CWH43	-1.30851	4.74428	-4.30103	0.00172671	0.0172901	-1.32252
RIMBP2	-1.3092	9.61203	-6.83746	5.64e-05	0.00266396	2.20939
MIR31HG	-1.30925	5.03452	-3.28894	0.00865781	0.0457961	-2.97122
LOC642852	-1.31001	11.5829	-3.49795	0.00614505	0.0369036	-2.62335
PRKY	-1.3112	5.18807	-5.28366	0.000412418	0.00762618	0.156574
GALNT10	-1.31346	6.65257	-3.47579	0.00637124	0.0377024	-2.66012
MPP5	-1.31448	7.79104	-3.46332	0.00650225	0.0382851	-2.68081
YPEL4	-1.31607	7.39031	-3.2121	0.00983088	0.0496558	-3.09964
CKMT2	-1.31636	7.70123	-4.88834	0.000721554	0.0104673	-0.421813
TMEM175	-1.31953	13.951	-3.40938	0.00710214	0.0403645	-2.77046
FAM133B	-1.31958	7.72123	-6.72712	6.42e-05	0.00281673	2.0748
DKK2	-1.32108	5.44175	-3.41684	0.00701582	0.0401321	-2.75805
DAGLA	-1.32241	5.7215	-7.34885	3.13e-05	0.00201164	2.81232
ZNF462	-1.32257	5.47138	-5.57627	0.00027654	0.00614661	0.569819
FAM27A	-1.32305	10.1644	-4.37825	0.00153522	0.016171	-1.20138
LOC339894	-1.32351	4.39573	-4.42317	0.00143432	0.0154571	-1.13129
PAK6	-1.32704	9.57091	-4.5828	0.00112909	0.0135185	-0.884392
HEPACAM	-1.3271	5.73484	-3.6567	0.00475098	0.0314365	-2.36111
CHGB	-1.32875	14.5253	-3.2997	0.00850549	0.0452832	-2.95325
GALNT3	-1.32923	7.98437	-9.32345	4.15e-06	0.000694054	4.85122
BTN3A3	-1.33079	9.18016	-4.5147	0.00124989	0.0143176	-0.989301
IER5	-1.33108	12.2563	-8.58556	8.45e-06	0.00100008	4.13899
SQLE	-1.33358	10.3677	-6.68148	6.79e-05	0.00290229	2.01865
UCMA	-1.33375	5.39118	-7.00712	4.62e-05	0.00238131	2.41318
SRCIN1	-1.33423	10.5927	-3.66277	0.0047048	0.0312573	-2.35113
RARG	-1.33503	7.54031	-4.08172	0.00242189	0.0210086	-1.67069
GNL3	-1.33631	10.6972	-5.45947	0.000323904	0.00668963	0.406385
SLC6A6	-1.33659	7.77827	-3.68142	0.00456558	0.0307623	-2.32046
SH3D21	-1.33775	10.4459	-5.20214	0.000461993	0.00815421	0.039189
SLC7A14	-1.33883	10.1699	-4.94239	0.000667539	0.0100679	-0.341379
USP13	-1.33904	8.88359	-5.94517	0.000169934	0.00475491	1.07287
C12orf63	-1.33969	4.42557	-6.2355	0.000117339	0.0039098	1.45492
HEY1	-1.34044	10.7333	-3.73321	0.00420127	0.029131	-2.23547
TOP1MT	-1.34178	9.9309	-5.54192	0.000289644	0.00628905	0.521961
LRP5	-1.34192	7.29825	-3.6547	0.00476633	0.0314882	-2.3644
KCNQ1	-1.34197	8.47561	-3.23108	0.00952671	0.0486762	-3.0679
DHRSX	-1.34239	9.31746	-5.55096	0.000286129	0.00624585	0.534584
ENTPD8	-1.34285	5.11732	-4.43561	0.00140763	0.0153223	-1.11192
CCL24	-1.34545	11.1241	-6.42336	9.29e-05	0.00339748	1.69575
KIAA1661	-1.34624	6.95879	-4.52902	0.00122339	0.0141519	-0.967184
PLIN4	-1.34675	5.72824	-3.2153	0.0097789	0.0494929	-3.09429
PVR	-1.34747	8.15396	-7.32169	3.22e-05	0.00203816	2.78114
MECOM	-1.34921	5.58366	-3.77622	0.00392191	0.0279935	-2.16509
DNALI1	-1.34944	11.1997	-3.65724	0.00474689	0.0314329	-2.36023
COG6	-1.34947	10.9014	-7.35993	3.09e-05	0.00200048	2.82501
RNF144A	-1.35171	7.04004	-5.23159	0.000443384	0.00796019	0.0817035
CYP3A5	-1.35289	4.41247	-3.99894	0.00275648	0.0226972	-1.80363
FAM98A	-1.35449	9.26764	-5.33975	0.000381643	0.00731968	0.23677
PNMA6A	-1.35509	7.12607	-4.39293	0.00150146	0.0159424	-1.17846
SPATA4	-1.35529	6.9293	-3.41216	0.00706981	0.0402781	-2.76583
ZBED1	-1.35638	9.87679	-5.04153	0.000579396	0.00929104	-0.194964
SLC39A11	-1.35827	7.79253	-4.85769	0.000754241	0.0107508	-0.467608
ARMCX1	-1.36235	11.1674	-5.59819	0.000268512	0.00607728	0.600273
CABIN1	-1.36247	10.9472	-4.14098	0.00220886	0.0199137	-1.57603
STON1-GTF2A1L	-1.36261	4.91871	-3.87409	0.00335631	0.0254325	-2.00561
APOBEC3G	-1.36316	6.66506	-3.444	0.0067108	0.0390135	-2.7129
MOB1B	-1.36356	8.04997	-7.29495	3.32e-05	0.00205154	2.75036
SOX13	-1.36431	6.91827	-6.08363	0.000142224	0.00431382	1.25657
DNAJC3	-1.36502	11.082	-8.00224	1.54e-05	0.00140673	3.53526
NDST3	-1.3652	4.95536	-6.22966	0.000118203	0.00392239	1.44735
RRBP1	-1.36569	10.4681	-3.98693	0.00280893	0.0229883	-1.82298
CLDN3	-1.36573	10.8573	-3.95032	0.00297544	0.0237568	-1.88209
PDE11A	-1.36983	7.71226	-3.98174	0.00283191	0.023076	-1.83135
PHF6	-1.36987	8.37574	-5.00146	0.00061342	0.00961391	-0.253966
LOC100652953	-1.3731	11.6329	-6.5246	8.2e-05	0.00320564	1.82349
KIAA1919	-1.374	10.6855	-7.49882	2.65e-05	0.00185426	2.98283
DMRT2	-1.37515	4.75889	-6.14594	0.000131384	0.00417333	1.33835
LOC100290566	-1.37649	10.0893	-8.17347	1.29e-05	0.00126277	3.71641
GOLM1	-1.37779	9.40154	-5.70875	0.000231674	0.00565061	0.752773
PRKCZ	-1.37811	6.72136	-8.21587	1.23e-05	0.00123438	3.76075
SSR4P1	-1.37843	7.51045	-3.81349	0.00369553	0.0269513	-2.10424
HIST2H2AC	-1.38115	10.4775	-4.77005	0.000856759	0.0116305	-0.599314
KIF16B	-1.38258	8.32406	-5.22225	0.000449195	0.00801643	0.0682382
CCDC30	-1.38349	8.61042	-5.87164	0.000186977	0.00500285	0.974191
C7orf23	-1.38456	8.67094	-5.58893	0.00027187	0.00609683	0.587424
MTFP1	-1.38519	7.66562	-7.9028	1.71e-05	0.00149629	3.42851
RPN1	-1.38604	8.45263	-6.43231	9.19e-05	0.00339224	1.70709
TMEM8B	-1.3866	9.83905	-3.4431	0.00672068	0.0390277	-2.7144
ROPN1	-1.38759	6.28157	-3.24358	0.00933169	0.0481029	-3.04701
C22orf23	-1.38803	7.74616	-4.05596	0.00252117	0.021562	-1.71198
APOL2	-1.38859	11.3528	-5.63251	0.000256442	0.00592747	0.647806
BRWD1	-1.38929	5.96762	-5.14381	0.000501376	0.00849472	-0.0454091
PHYH	-1.39291	9.71581	-7.4688	2.74e-05	0.00189595	2.94892
COPZ2	-1.39426	7.6045	-3.28581	0.00870273	0.0459292	-2.97645
DFNB59	-1.39492	8.34912	-3.96251	0.00291886	0.0235025	-1.86239
RWDD4	-1.39626	10.19	-6.63134	7.21e-05	0.00299351	1.95664
B3GNT9	-1.39695	12.8209	-4.40613	0.00147175	0.0157165	-1.15785
GRB7	-1.40073	7.35833	-4.60694	0.00108932	0.013283	-0.847372
FAM46C	-1.40567	7.23582	-3.22317	0.00965232	0.0490191	-3.08113
TMCO4	-1.40649	8.48597	-3.95505	0.00295335	0.0236356	-1.87444
EPHA1	-1.40719	5.14779	-3.60608	0.00515562	0.0331181	-2.44451
LOC100287482	-1.41068	7.70782	-6.58593	7.61e-05	0.00308419	1.90019
C4orf34	-1.41128	11.1839	-6.4672	8.8e-05	0.00331651	1.75123
WDR65	-1.41147	5.6764	-4.61168	0.00108169	0.0132378	-0.84011
HENMT1	-1.41351	9.57711	-3.45633	0.00657696	0.0385432	-2.69243
PRORSD1P	-1.41796	7.91057	-6.19918	0.000122828	0.00401916	1.40778
NCOA7	-1.42123	7.98546	-5.1172	0.000520527	0.0087094	-0.0841729
ZDHHC23	-1.42379	8.58803	-5.54152	0.000289801	0.00628905	0.521403
SPTLC2	-1.4239	8.4941	-4.93608	0.000673618	0.0101151	-0.350751
PABPC3	-1.42484	9.8536	-5.90213	0.000179696	0.00489997	1.0152
AKAP13	-1.42533	9.67582	-7.95336	1.62e-05	0.00143294	3.48292
DNAAF1	-1.42576	5.24443	-4.35095	0.0016002	0.0165382	-1.24411
HIPK1	-1.42892	10.7166	-6.17547	0.000126561	0.00409088	1.37691
SYNPO	-1.43048	9.94036	-5.44672	0.000329579	0.00674585	0.388428
LOC100288860	-1.43069	5.39317	-4.20318	0.00200643	0.0189038	-1.47712
SEC11C	-1.43326	14.5966	-4.77813	0.000846716	0.0115484	-0.58713
KIAA1652	-1.4346	10.2743	-6.64538	7.09e-05	0.00296948	1.97404
MAP6D1	-1.43492	9.02949	-5.93546	0.000172084	0.00479313	1.05989
ATP8B1	-1.43513	4.25716	-3.85038	0.00348498	0.0260147	-2.04416
MAGT1	-1.43596	9.28466	-3.752	0.00407678	0.0286465	-2.20471
PIEZO2	-1.43685	7.06274	-7.87912	1.75e-05	0.00151546	3.40292
CCDC151	-1.43732	9.06584	-3.72827	0.00423469	0.0292925	-2.24357
KIF26B	-1.43762	6.51592	-3.71749	0.0043085	0.0296306	-2.26124
FAM63B	-1.4382	9.86026	-4.5974	0.00110486	0.0133943	-0.861998
TSPAN5	-1.43865	9.75228	-4.93976	0.000670066	0.010098	-0.345285
ANXA2P3	-1.43968	5.16261	-4.36951	0.00155572	0.0162978	-1.21506
BATF2	-1.44019	7.00576	-4.00054	0.00274956	0.0226857	-1.80105
TIMP1	-1.44062	12.6832	-3.37775	0.00748038	0.0417512	-2.82312
FOXP1	-1.44085	11.932	-6.66187	6.95e-05	0.00292742	1.99445
COL18A1	-1.44096	8.70796	-3.2586	0.0091028	0.0473184	-3.02191
CYP4F2	-1.44123	8.94754	-5.98483	0.000161445	0.0046024	1.12577
NACAD	-1.44213	10.6078	-4.0792	0.00243142	0.0210574	-1.67473
H2AFJ	-1.44236	11.5848	-3.55779	0.00557522	0.0347638	-2.52427
CYP51A1	-1.44321	9.37144	-5.17468	0.000480107	0.00828367	-0.000583131
NPR1	-1.44376	7.13496	-4.02263	0.00265602	0.0222201	-1.76551
PTP4A1	-1.44391	10.6844	-3.79732	0.00379203	0.0273675	-2.13063
SLC34A1	-1.44446	6.25074	-4.85349	0.000758849	0.0107757	-0.473904
ZNF608	-1.44534	5.61144	-5.0881	0.000542372	0.00894368	-0.126684
MYZAP	-1.44567	4.81785	-4.9256	0.000683837	0.0101993	-0.366315
MOB3B	-1.44885	7.23683	-3.771	0.00395474	0.0281637	-2.17362
LOC400684	-1.44927	7.06302	-6.27207	0.000112079	0.00381332	1.50218
SEC16B	-1.45081	6.00203	-4.75965	0.000869881	0.0117257	-0.615019
PDIA4	-1.45113	9.61199	-4.90486	0.000704562	0.0103221	-0.397179
CDKN2B	-1.45205	6.00082	-3.70115	0.00442309	0.0301258	-2.28806
EXOC3L2	-1.45325	12.3824	-5.18177	0.000475357	0.00823861	0.00969851
UCP3	-1.45451	11.4373	-4.46099	0.00135482	0.0149638	-1.07247
AFF3	-1.45525	6.92767	-3.8579	0.00344362	0.0258598	-2.03192
PLXNA2	-1.45618	7.70025	-4.31431	0.00169204	0.017093	-1.30162
MEX3A	-1.45829	6.26089	-3.23718	0.00943092	0.0483825	-3.05769
PEMT	-1.46008	10.9777	-4.98591	0.000627198	0.00970455	-0.276933
ZNF74	-1.46453	8.32482	-5.62231	0.000259967	0.00597192	0.633699
MNS1	-1.46459	7.83852	-4.57708	0.00113875	0.0135988	-0.893182
FAM35B	-1.46539	8.28126	-4.02478	0.00264708	0.0221848	-1.76205
PBX4	-1.46698	8.57808	-6.66539	6.92e-05	0.00292162	1.99879
SLC25A21	-1.46882	5.82571	-4.564	0.00116116	0.013758	-0.913299
SUPT3H	-1.46967	5.58664	-4.99519	0.000618931	0.00966005	-0.263214
RSPH10B	-1.47024	5.54743	-6.29522	0.000108881	0.00376352	1.53201
NBPF22P	-1.47026	4.92412	-4.00049	0.0027498	0.0226857	-1.80114
BAGE	-1.47055	11.5961	-7.18781	3.75e-05	0.00214664	2.62609
NUDT4	-1.47122	10.1671	-5.295	0.000405989	0.00758103	0.172822
LRRC2	-1.47672	4.38395	-3.38667	0.00737159	0.0413645	-2.80826
FAH	-1.47912	9.10418	-3.66756	0.00466859	0.0311291	-2.34324
TRIM35	-1.48107	8.58997	-8.19952	1.25e-05	0.00124808	3.74368
AGPAT9	-1.48242	9.88732	-3.6169	0.00506619	0.0327618	-2.42666
APBB2	-1.48424	9.10984	-3.5545	0.00560512	0.0349033	-2.52972
RHOBTB1	-1.48952	7.92927	-3.67641	0.00460257	0.0308945	-2.3287
FAM111A	-1.49036	10.5686	-4.87356	0.000737129	0.010579	-0.443887
KRT18	-1.49108	12.6816	-3.55347	0.00561452	0.0349271	-2.53143
ZC3HAV1L	-1.49132	8.38046	-4.81284	0.000804965	0.0111857	-0.534876
FGFR2	-1.49419	4.777	-4.20954	0.00198685	0.018777	-1.46703
SLC5A3	-1.49434	8.25927	-3.97798	0.00284872	0.0231728	-1.83742
RTBDN	-1.49465	10.9587	-3.71915	0.0042971	0.0295767	-2.25853
ENKUR	-1.49605	6.24942	-4.32529	0.00166397	0.016923	-1.28438
UGT8	-1.49634	4.06328	-3.44366	0.00671458	0.0390154	-2.71347
PYGO1	-1.49731	6.14981	-6.82528	5.72e-05	0.00267379	2.19462
HAR1A	-1.4992	9.11601	-4.37405	0.00154503	0.0162265	-1.20795
C10orf67	-1.49978	5.56162	-6.6086	7.41e-05	0.00304375	1.92841
MFSD9	-1.50037	8.36217	-6.92021	5.11e-05	0.00251149	2.30927
LOC100506190	-1.50232	9.10876	-3.37437	0.0075219	0.0418442	-2.82873
DNAJC12	-1.5034	10.5715	-5.59901	0.000268217	0.00607728	0.601405
SLC38A2	-1.5054	9.387	-3.89799	0.00323166	0.0248808	-1.96681
CTAGE5	-1.508	8.15308	-6.28737	0.000109954	0.00378205	1.52191
SYCP2	-1.50918	5.97412	-3.66227	0.00470858	0.0312714	-2.35195
C8orf48	-1.51173	4.59248	-3.38571	0.00738326	0.0414118	-2.80986
CCDC108	-1.51282	7.59927	-3.70855	0.00437081	0.0299315	-2.27591
SPATA13	-1.51333	7.93907	-4.43271	0.00141382	0.0153685	-1.11644
CHD5	-1.51626	5.89812	-4.66265	0.0010031	0.0126493	-0.762218
LOC100505938	-1.51907	11.2234	-3.34317	0.0079178	0.0433508	-2.88074
CPNE8	-1.51985	6.63573	-4.31482	0.00169072	0.0170889	-1.30082
C1GALT1C1	-1.52207	11.5911	-3.62325	0.00501448	0.0325673	-2.4162
DIRAS1	-1.52419	11.6094	-3.69848	0.00444204	0.0302049	-2.29243
RYR1	-1.52437	6.08694	-3.27538	0.00885389	0.0464221	-2.99387
SAT1	-1.52442	12.9644	-3.71905	0.00429778	0.0295767	-2.25869
FKSG2	-1.52447	6.82291	-7.81464	1.88e-05	0.00156877	3.33291
FAM49A	-1.52448	7.73004	-3.90663	0.00318782	0.0247284	-1.95281
ASPHD2	-1.52705	8.538	-3.98327	0.00282515	0.0230508	-1.82889
LY6K	-1.52717	5.83158	-3.7489	0.00409701	0.028731	-2.20978
PARP14	-1.52751	8.69613	-4.59423	0.00111007	0.0134227	-0.866849
CGN	-1.52893	8.53385	-4.02327	0.00265337	0.0222127	-1.76448
RIN2	-1.53177	6.21281	-4.39379	0.00149949	0.015926	-1.1771
ICMT	-1.53373	8.14316	-7.81113	1.88e-05	0.00156877	3.32908
NAB2	-1.53545	9.81209	-5.79761	0.000206016	0.00527733	0.874037
CNNM1	-1.53733	7.09001	-4.42467	0.00143108	0.0154377	-1.12896
RSPH9	-1.5375	8.93168	-3.71283	0.00434086	0.0297969	-2.26889
EBNA1BP2	-1.53901	5.58028	-5.55191	0.000285765	0.00624585	0.535902
ASPHD1	-1.53926	11.7615	-4.41632	0.00144925	0.0155637	-1.14197
WFIKKN2	-1.53929	5.88868	-4.25322	0.00185782	0.0179994	-1.3979
HES4	-1.54013	10.0372	-5.51235	0.000301458	0.00642292	0.480634
KLK8	-1.54088	5.12368	-6.43823	9.12e-05	0.00338088	1.71459
CCDC39	-1.54149	5.60944	-5.47122	0.000318766	0.00663534	0.422918
RPS10P7	-1.54261	13.5077	-11.8072	5.12e-07	0.000214024	6.89187
RPP25	-1.54623	7.46387	-7.04244	4.43e-05	0.0023381	2.45513
RAP1GAP	-1.54786	7.4176	-4.14468	0.00219624	0.0198719	-1.57013
NDUFAF2	-1.55084	11.1035	-7.6979	2.13e-05	0.00167507	3.20491
PFKP	-1.55174	12.0876	-3.96724	0.00289724	0.0234307	-1.85476
NPFFR2	-1.5524	4.91684	-3.26931	0.00894299	0.046798	-3.004
ANKRD42	-1.55351	8.03007	-6.18169	0.000125571	0.00409088	1.38501
CNN3	-1.55449	10.0415	-3.22689	0.00959301	0.0488701	-3.07491
PLEKHG4	-1.55513	6.82264	-3.61874	0.00505118	0.0327322	-2.42364
KRT16	-1.55667	5.60098	-4.47036	0.00133586	0.0148241	-1.05794
FEZ1	-1.55689	9.5041	-3.57243	0.0054444	0.0342941	-2.50008
CCDC11	-1.55695	8.30117	-5.15375	0.000494422	0.00842178	-0.0309655
C19orf33	-1.55742	9.06026	-4.53968	0.00120406	0.0140318	-0.950747
SHROOM1	-1.56389	9.92627	-5.24098	0.000437623	0.00790199	0.0952294
PROZ	-1.56459	4.88285	-5.34452	0.000379144	0.00728784	0.243563
LRRC6	-1.56696	7.7867	-6.2365	0.000117191	0.0039098	1.45622
DNAH11	-1.56874	4.67934	-3.91238	0.00315895	0.0245907	-1.94348
NTF4	-1.57148	5.22979	-4.27759	0.00178971	0.0175978	-1.35944
TEKT2	-1.57243	8.9576	-3.63766	0.00489917	0.0321065	-2.39246
TMEM123	-1.57597	10.1712	-3.59654	0.0052358	0.0334221	-2.46025
LAIR2	-1.57964	4.8707	-5.97531	0.00016344	0.0046398	1.11309
C8orf34	-1.58016	4.15316	-5.23748	0.000439758	0.00792441	0.0901973
PPFIBP1	-1.58122	9.47705	-5.76979	0.000213702	0.0054043	0.836201
FAM7A1	-1.58165	6.1989	-4.15295	0.0021683	0.0197482	-1.55696
BFSP2	-1.58319	4.79012	-4.59918	0.00110195	0.0133676	-0.859268
LOC100128164	-1.5841	7.86474	-6.59712	7.51e-05	0.00305911	1.91413
PAQR6	-1.58701	11.0605	-3.9895	0.00279762	0.0229456	-1.81884
PHLDB3	-1.58868	9.40027	-5.01626	0.000600607	0.00951527	-0.23214
ANO6	-1.58928	9.07757	-4.22557	0.00193843	0.0185047	-1.44164
ERBB2	-1.5893	8.25488	-4.85984	0.000751904	0.0107376	-0.4644
TRAF3	-1.58933	6.60005	-7.68731	2.15e-05	0.00168038	3.1932
FAM167B	-1.59094	7.71406	-8.2517	1.19e-05	0.0012084	3.79806
CHMP2B	-1.59151	9.42367	-9.36477	3.99e-06	0.000670841	4.8895
TST	-1.59218	11.2372	-5.92146	0.000175237	0.00483423	1.04114
FONG	-1.59255	6.35263	-4.80897	0.000809509	0.0112254	-0.540694
RASSF9	-1.5951	4.52178	-6.96632	4.84e-05	0.00244025	2.36453
IGSF10	-1.59535	4.79922	-4.14572	0.00219271	0.0198719	-1.56848
FANK1	-1.59606	8.83308	-4.53159	0.00121869	0.014138	-0.963215
LOC145757	-1.59771	5.70492	-4.14005	0.00221204	0.0199375	-1.57751
HPCA	-1.59949	6.94697	-4.32125	0.00167425	0.0169862	-1.29073
NDN	-1.60371	11.9109	-5.99176	0.000160008	0.00458226	1.135
DDX3X	-1.61428	10.0121	-8.3431	1.08e-05	0.00115085	3.89262
ACPL2	-1.61504	9.57581	-3.74759	0.0041056	0.0287668	-2.21192
C7orf41	-1.61722	12.7307	-9.55118	3.36e-06	0.000629214	5.0602
MSX2	-1.61898	4.30501	-7.70663	2.11e-05	0.00166978	3.21453
PCDH11Y	-1.62836	4.14429	-3.54143	0.00572532	0.0353804	-2.55133
CLIC3	-1.62971	5.87257	-4.95448	0.00065606	0.00995465	-0.323446
CTBP2	-1.62998	13.1953	-7.67789	2.17e-05	0.00168425	3.18279
OSTCP1	-1.63608	8.24509	-9.47953	3.59e-06	0.00063329	4.99498
RAB11FIP1	-1.63647	7.96034	-7.63259	2.28e-05	0.00173033	3.13257
TRIB3	-1.63677	10.2722	-6.08757	0.00014151	0.00431008	1.26176
LGALS8-AS1	-1.63689	5.47469	-5.14522	0.000500382	0.00849319	-0.0433581
KRT23	-1.63697	6.61712	-3.32965	0.00809589	0.0439544	-2.90328
RASGEF1A	-1.63932	9.51097	-3.66543	0.00468468	0.0311727	-2.34676
TUBB8	-1.63941	6.99607	-9.08892	5.18e-06	0.000777986	4.63078
MSI2	-1.64239	8.36112	-4.92876	0.000680744	0.0101835	-0.361629
COTL1	-1.64353	10.0581	-3.63994	0.00488121	0.0320223	-2.38871
RAB27B	-1.64414	6.2102	-6.70592	6.59e-05	0.0028623	2.04875
C12orf75	-1.64447	8.50816	-4.85907	0.000752744	0.0107402	-0.465555
HIPK2	-1.6482	9.5325	-5.82611	0.000198449	0.00519638	0.912693
GOLGA6C	-1.65191	7.40836	-6.85327	5.53e-05	0.00263968	2.22855
TUBA4A	-1.65408	10.6467	-3.52226	0.00590664	0.0360121	-2.58308
GPR135	-1.65742	9.97671	-7.08184	4.24e-05	0.0022974	2.50174
MSX2P1	-1.65773	5.1149	-7.2467	3.51e-05	0.0021061	2.69458
B3GNT5	-1.65997	6.96776	-4.25066	0.00186513	0.018047	-1.40195
SRPRB	-1.66058	10.9331	-8.90703	6.16e-06	0.000849742	4.45607
MFI2	-1.66089	8.51444	-4.62082	0.00106712	0.0131615	-0.826108
2018-03-04	-1.66596	6.97597	-4.14522	0.00219438	0.0198719	-1.56926
NKX3-2	-1.66707	4.38083	-3.81522	0.00368538	0.026914	-2.10142
NKD2	-1.66912	6.32319	-3.65962	0.00472872	0.031372	-2.35631
NRG4	-1.6697	5.74346	-3.59983	0.00520808	0.0333356	-2.45484
VSX1	-1.67285	6.22163	-5.41177	0.000345695	0.00693418	0.339063
HMHB1	-1.67653	8.83473	-6.50375	8.42e-05	0.00324782	1.7973
PDIA5	-1.67688	10.5293	-3.71746	0.00430877	0.0296306	-2.2613
KCTD4	-1.67747	7.18475	-4.47576	0.00132507	0.0147653	-1.04957
GSN	-1.67866	13.007	-4.88093	0.00072932	0.010503	-0.43288
MAP3K5	-1.68046	10.3269	-5.22215	0.000449259	0.00801643	0.0680915
TLE3	-1.68147	5.60922	-4.30083	0.00172723	0.0172907	-1.32283
PCSK6	-1.68226	5.68658	-4.66826	0.000994842	0.0125877	-0.75368
ALDH1A2	-1.68714	5.20959	-3.87207	0.00336709	0.0254971	-2.00889
CLVS1	-1.68916	5.83127	-5.15985	0.000490202	0.00839014	-0.0221014
KCNG1	-1.69149	6.24026	-4.81218	0.000805736	0.0111881	-0.535865
C7orf31	-1.69174	6.97764	-5.89145	0.00018221	0.00493983	1.00086
MOB3C	-1.69382	8.29061	-7.00978	4.61e-05	0.00238053	2.41635
TRIM47	-1.70006	9.58548	-3.46428	0.00649208	0.0382602	-2.67922
NEURL3	-1.70051	5.89026	-3.67759	0.00459385	0.030869	-2.32676
C6orf192	-1.7024	10.5463	-4.59683	0.00110579	0.013397	-0.862866
AMD1	-1.70534	10.9244	-9.02031	5.53e-06	0.000803085	4.56526
MCTP1	-1.70686	6.90615	-4.84628	0.000766818	0.01083	-0.4847
SET	-1.71084	7.9953	-8.21748	1.23e-05	0.00123438	3.76243
TPPP3	-1.71149	10.1163	-3.31353	0.0083138	0.0445988	-2.93018
CTSO	-1.71505	6.29871	-5.10174	0.000532009	0.00883057	-0.106734
ANKRD36	-1.71526	7.94324	-5.45665	0.000325152	0.00670438	0.402408
WNT6	-1.72236	8.77478	-3.63922	0.00488683	0.0320465	-2.38988
TYRO3	-1.72559	6.89443	-6.76586	6.13e-05	0.00276123	2.12225
PRSS36	-1.72692	8.04684	-3.54605	0.0056825	0.0351987	-2.54369
ZFP36L2	-1.73184	9.16103	-3.32772	0.00812163	0.044018	-2.90649
COL9A1	-1.73275	6.78165	-3.81039	0.00371384	0.0270052	-2.1093
MFI2-AS1	-1.73356	10.2538	-5.04335	0.000577898	0.00927347	-0.192287
TNFRSF1A	-1.73473	7.77917	-3.42507	0.0069219	0.0397848	-2.74436
C3orf78	-1.74406	11.7684	-7.02486	4.53e-05	0.00236827	2.43427
TNNT2	-1.74584	5.62013	-4.88205	0.000728139	0.0105021	-0.431203
LOC389493	-1.74623	10.9704	-3.92478	0.00309769	0.0242694	-1.92339
CDH19	-1.74669	5.11283	-3.94645	0.00299362	0.0238211	-1.88834
TTC9	-1.75022	9.45483	-4.04721	0.00255587	0.021735	-1.72602
RARRES3	-1.75175	11.0891	-3.522	0.00590908	0.0360212	-2.5835
TRIM34	-1.75223	7.06659	-4.70993	0.000935639	0.0122192	-0.690306
MAP7D3	-1.7579	8.78151	-5.84251	0.000194233	0.00512551	0.93487
TCF7	-1.76067	6.82923	-3.69035	0.00450053	0.030487	-2.3058
SDK2	-1.76207	11.2071	-5.90291	0.000179514	0.00489855	1.01625
GALNT5	-1.76455	5.40249	-7.30222	3.3e-05	0.00204989	2.75873
MPO	-1.76695	4.58572	-4.52336	0.00123379	0.0142167	-0.975922
FAM181A	-1.77113	7.77982	-6.10666	0.000138108	0.00425636	1.28687
CAPN12	-1.77164	8.18776	-4.05183	0.00253746	0.0216384	-1.7186
SLC4A11	-1.77349	7.26751	-4.98842	0.000624954	0.00968975	-0.273227
LOC729444	-1.77366	6.09806	-3.43464	0.00681433	0.039377	-2.72845
PPAP2C	-1.77367	7.09726	-3.40771	0.00712159	0.0404531	-2.77324
GIPR	-1.776	7.42965	-5.59686	0.000268992	0.00608303	0.598426
SGMS2	-1.77621	5.81259	-5.69018	0.000237461	0.00569916	0.727277
DMRTA1	-1.77962	5.61052	-5.33416	0.000384595	0.00734893	0.2288
DKFZp779M0652	-1.78071	7.00861	-3.96287	0.00291721	0.0235013	-1.86181
C20orf26	-1.78166	10.2721	-3.51655	0.00596177	0.036216	-2.59254
CYB5A	-1.78522	11.3754	-3.95015	0.00297624	0.0237581	-1.88236
WNK3	-1.78543	7.80919	-4.96766	0.000643785	0.00983778	-0.303919
SVOPL	-1.78708	5.36191	-3.53661	0.00577038	0.0355353	-2.55932
C3orf52	-1.78753	5.74316	-5.10634	0.000528564	0.00879581	-0.100018
IZUMO2	-1.79103	4.79035	-4.22091	0.00195238	0.018576	-1.44902
RANBP3L	-1.79316	5.06201	-3.53137	0.00581972	0.0357584	-2.56799
NAT8	-1.79343	5.25212	-5.15061	0.000496605	0.00844048	-0.0355208
DPPA4	-1.79584	4.62085	-4.12704	0.00225713	0.0201855	-1.59826
HEY2	-1.79844	5.41281	-4.42983	0.00141997	0.0153776	-1.12091
OLFM1	-1.79851	11.8233	-3.88468	0.00330047	0.0252224	-1.98841
HSPA1A	-1.79894	11.7926	-4.70673	0.000940053	0.012236	-0.695168
TNFRSF25	-1.79952	12.7285	-6.07361	0.000144055	0.00433664	1.24337
C9orf116	-1.80686	9.76314	-8.69532	7.58e-06	0.000944766	4.24847
HSH2D	-1.80752	8.79984	-4.51516	0.00124903	0.0143176	-0.98859
KRTAP5-8	-1.81305	9.04049	-4.10221	0.00234589	0.0206089	-1.63792
RHBDL3	-1.81528	6.94824	-3.31956	0.00823164	0.0443533	-2.92012
CDH4	-1.81534	5.10127	-5.22414	0.000448012	0.00801643	0.0709661
GLIS3	-1.81813	5.60646	-5.82105	0.000199771	0.0052071	0.905834
CHADL	-1.81948	10.4403	-6.22568	0.000118797	0.00393821	1.44218
S100A14	-1.82128	5.03626	-3.47898	0.00633818	0.0376063	-2.65483
RPL24	-1.8218	11.8518	-7.72122	2.07e-05	0.0016601	3.2306
SLC44A3	-1.82244	8.66348	-4.75377	0.000877391	0.0117883	-0.623901
ZNF239	-1.82352	8.91843	-6.28045	0.000110909	0.00380408	1.51299
ACSS1	-1.82396	8.52114	-4.60157	0.00109803	0.0133459	-0.855594
ZNF395	-1.82398	7.56204	-9.42753	3.77e-06	0.000647375	4.94734
AMDHD1	-1.82466	5.77618	-3.23057	0.00953477	0.0486762	-3.06876
MYOZ3	-1.82569	7.09593	-4.31933	0.00167914	0.017013	-1.29374
JUP	-1.82654	9.96376	-5.18647	0.000472237	0.00821557	0.016509
DENND2D	-1.83182	10.2919	-4.59305	0.00111201	0.0134334	-0.868657
IGSF9	-1.8355	8.02398	-5.96375	0.000165899	0.00468608	1.09768
[truncated: 754 more rows]
