# Supplementary material for: Quantitative Analysis of Proteome in Non-functional Pituitary Adenomas: Clinical Relevance and Potential Benefits for the Patients
Source: Front Endocrinol (Lausanne). 2019 Dec 5;10:854. doi: 10.3389/fendo.2019.00854 (PMC6915109; doi:10.3389/fendo.2019.00854)
Supplement: Supplementary file 5 [file Table_5.xls]

## Sheet: Sheet 1
Supplemental Table 5. 3598 DEGs between NFPAs and controls
DEGs	Alteration
ABCA3	up
ABCG4	up
ABLIM3	up
ACCN2	up
ACER3	up
ACO2	up
ACOT2	up
ACSL4	up
ACSL6	up
ACSM2A	up
ACSM2B	up
ACTR1B	up
ADAM15	up
ADAM22	up
ADC	up
ADCY1	up
ADCY5	up
ADRA2A	up
AES	up
AGBL1	up
AIFM2	up
AIM1	up
AIM1L	up
AKAP6	up
AKNA	up
AKR1B1	up
AKT1	up
AKT3	up
ALAD	up
ALOX12	up
AMHR2	up
AMIGO1	up
AMMECR1	up
ANKDD1A	up
ANKRD55	up
ANKRD6	up
ANKS6	up
APBA1	up
APH1A	up
AR	up
ARAF	up
ARFGAP2	up
ARHGAP1	up
ARHGAP20	up
ARHGAP24	up
ARHGAP32	up
ARHGAP33	up
ARHGEF11	up
ARHGEF12	up
ARHGEF2	up
ARHGEF3	up
ARHGEF4	up
ARL6IP1	up
ARMC10	up
ARNTL2	up
ASB1	up
ATCAY	up
ATG13	up
ATN1	up
ATOH8	up
ATP1A4	up
ATP2A2	up
ATP5B	up
ATP5G3	up
ATP6V0E2	up
AVL9	up
B4GALNT1	up
BAHD1	up
BAP1	up
BCAS4	up
BCKDK	up
BCL9	up
BCLAF1	up
BEND5	up
BEND6	up
BHLHE41	up
BRMS1L	up
BRPF3	up
BSCL2	up
BSPRY	up
BST1	up
BTBD11	up
BTBD9	up
BTD	up
BTRC	up
BUB1	up
C11orf41	up
C11orf80	up
C11orf87	up
C12orf32	up
C12orf39	up
C12orf49	up
C14orf1	up
C14orf162	up
C15orf29	up
C17orf101	up
C18orf10	up
C1orf135	up
C1orf226	up
C1orf51	up
C20orf203	up
C20orf27	up
C20orf46	up
C22orf15	up
C2orf61	up
C2orf84	up
C3orf39	up
C3orf58	up
C3orf70	up
C4orf21	up
C4orf48	up
C4orf49	up
C5orf13	up
C5orf25	up
C5orf35	up
C6orf64	up
C8orf33	up
C8orf42	up
C8orf47	up
C9orf174	up
C9orf40	up
C9orf91	up
CA10	up
CA11	up
CAB39L	up
CABLES2	up
CADM3	up
CALM1	up
CALM3	up
CAMK2G	up
CAMK2N1	up
CASK	up
CBX3P2	up
CCDC69	up
CCNB1	up
CCND2	up
CCNE1	up
CCNG1	up
CD276	up
CD83	up
CD99L2	up
CDC25A	up
CDCA5	up
CDCA8	up
CDH10	up
CDH8	up
CDHR1	up
CDIPT	up
CDK16	up
CDK18	up
CDS1	up
CELSR2	up
CENPA	up
CENPF	up
CENPH	up
CENPW	up
CEP135	up
CEP152	up
CERS6	up
CES2	up
CHID1	up
CHST11	up
CHST4	up
CHST5	up
CHUK	up
CIB4	up
CISD2	up
CITED1	up
CKMT1A	up
CLCN5	up
CLCNKB	up
CLDN9	up
CLEC2L	up
CLIP3	up
CLN6	up
CLU	up
CNGA1	up
CNIH3	up
CdownT8	up
CNRIP1	up
CNTN1	up
COBLL1	up
COG8	up
COL2A1	up
COLQ	up
COX10	up
COX7B	up
CPLX2	up
CRABP1	up
CRABP2	up
CRIP3	up
CRY2	up
CRYGA	up
CRYGC	up
CSNK1E	up
CSPG5	up
CSRP1	up
CSRP2	up
CTSD	up
CTSS	up
CTTNBP2	up
CUL3	up
CXorf57	up
CXorf69	up
CYBASC3	up
CYC1	up
CYGB	up
CYP11A1	up
CYP27A1	up
CYP2A6	up
CYP2B6	up
CYP4F12	up
DBF4B	up
DBNL	up
DBP	up
DCAF7	up
DCDC2	up
DCK	up
DCLK2	up
DCTPP1	up
DDIT3	up
DEF6	up
DGAT2	up
DHCR24	up
DHRS11	up
DLGAP1	up
DNAJC19	up
DNASE1L1	up
DNPEP	up
DNTT	up
DOCK5	up
DOK6	up
DOPEY1	up
DPY19L2	up
DPY19L2P2	up
DSCR3	up
DSN1	up
DTNB	up
DTX1	up
DUSP10	up
DYNC1I1	up
DYRK3	up
ECE2	up
EDA	up
EFCAB11	up
EFNB3	up
ELK1	up
ELOVL7	up
Edown2	up
EPB41L1	up
EPB41L4B	up
EPB41L5	up
EPB49	up
EPHA10	up
EPHB1	up
EPS8	up
ERLIN1	up
ERO1L	up
ETNK2	up
EXD3	up
EXOC7	up
EXOSC5	up
EZH2	up
FAAH	up
FABP3	up
FADS1	up
FADS2	up
FAM113B	up
FAM122B	up
FAM122C	up
FAM123B	up
FAM132A	up
FAM181B	up
FAM54B	up
FAM5C	up
FAM60A	up
FAM64A	up
FAM69A	up
FAM70A	up
FAM82A1	up
FAM83D	up
FAM84B	up
FANCD2	up
FANCI	up
FANCM	up
FARP2	up
FBXL14	up
FBXO27	up
FCGR2A	up
FEV	up
FIG4	up
FILIP1L	up
FLJ30064	up
FLOT2	up
FMN2	up
FNDC5	up
FOLR2	up
FRAT1	up
FRAT2	up
FRMPD1	up
FSTL5	up
FXR1	up
GAL3ST1	up
GAL3ST3	up
GALNT12	up
GBA2	up
GDEP	up
GLCE	up
GM2A	up
GNA12	up
GNB3	up
GNB5	up
GNPDA1	up
GNRHR2	up
GOLGA6L6	up
GOLGA6L9	up
GPAA1	up
GPD1	up
GPR137B	up
GPR27	up
GPSM2	up
GPT2	up
GRIA4	up
GRIK5	up
GRINA	up
GRK6	up
GSDMB	up
GSG1L	up
GSTCD	up
GSTM2	up
GTPBP6	up
GTSE1	up
GUCA2B	up
H2BFXP	up
HADH	up
HCCS	up
HCN3	up
HDAC3	up
HDC	up
HEATR4	up
HEATR8	up
HIATL1	up
HIF1AN	up
HIGD1B	up
HIST1H2AC	up
HIST1H2AD	up
HIST1H2BE	up
HIST1H2BJ	up
HIST1H2BK	up
HIST1H2BM	up
HIST2H2AA4	up
HIST2H2BE	up
HLA-A	up
HMGA1	up
HMGA2	up
HMMR	up
HMP19	up
HPCAL4	up
HPS1	up
HRH3	up
HSD17B14	up
HSPA8	up
HTR1E	up
IDH1	up
IDS	up
IFI44	up
IFI44L	up
IGF2BP2	up
IGSF5	up
IGSF8	up
IMPDH1	up
INHA	up
INPP5E	up
INPP5J	up
IPCEF1	up
IPO13	up
IQGAP2	up
IQSEC2	up
ITGB3BP	up
ITIH5	up
ITPR2	up
JAKMIP2	up
KALRN	up
KAT6B	up
KAT7	up
KATNB1	up
KBTBD4	up
KCNA3	up
KCNA4	up
KCNC4	up
KCND3	up
KCNH3	up
KCNK3	up
KCTD13	up
KCTD14	up
KDM1A	up
KDM4D	up
KHDC1	up
KIAA0040	up
KIAA0247	up
KIAA0889	up
KIAA0922	up
KIAA1456	up
KIAA1524	up
KIAA1715	up
KIF11	up
KIF15	up
KIF1A	up
KIF1B	up
KIF21B	up
KIF2C	up
KLF8	up
KLHDC8B	up
KLHL18	up
KLHL23	up
KNTC1	up
KREMEN1	up
KREMEN2	up
LAMP2	up
LCN12	up
LGALS2	up
LGMN	up
LINC00086	up
LINC00087	up
LINC00277	up
LINGO1	up
LOC100127983	up
LOC100128239	up
LOC100129397	up
LOC100129447	up
LOC100131434	up
LOC100287616	up
LOC100505564	up
LOC100505679	up
LOC100506409	up
LOC100507475	up
LOC100507520	up
LOC100509683	up
LOC100652987	up
LOC151658	up
LOC157627	up
LOC158435	up
LOC202181	up
LOC253039	up
LOC286272	up
LOC441204	up
LOC441666	up
LOC643201	up
LOC643355	up
LOC650293	up
LOC728743	up
LOC729680	up
LOC730091	up
LONRF1	up
LPCAT4	up
LPHN3	up
LPIN2	up
LRPPRC	up
LRRC16A	up
LRRC28	up
LRRC41	up
LSAMP	up
LUZP1	up
M6PR	up
MACROD2	up
MAD2L1	up
MAGED2	up
MANEA	up
MANEAL	up
MAOA	up
MAOB	up
MAPK8IP2	up
MAPK9	up
MAPRE3	up
MAST2	up
MAT2A	up
MAZ	up
MCF2L2	up
MCM2	up
MCU	up
MECP2	up
MED12	up
MEGF8	up
MEGF9	up
MEIS3	up
MESP1	up
MFSD3	up
MGAT4B	up
MIOS	up
MIS18BP1	up
MKRN3	up
MLF1IP	up
MLLT6	up
MLST8	up
MOAP1	up
MOSPD1	up
MOSPD2	up
MPL	up
MPP2	up
MRAP2	up
MRO	up
MRPL10	up
MST4	up
MT2A	up
MTMR8	up
MYO1H	up
NAdownS3	up
NAP1L1	up
NAV1	up
NCOA3	up
NDFIP2	up
NDUFA1	up
NECAB1	up
NFATC3	up
NIT2	up
NLGN2	up
NLRP3	up
NMNAT3	up
downL4	up
NPAT	up
NPM2	up
NR0B1	up
NR1D2	up
NR1H2	up
NR6A1	up
NRG1	up
NRG2	up
NRN1L	up
NSDHL	up
NUF2	up
NUSAP1	up
NYNRIN	up
OAS3	up
OBSL1	up
OCRL	up
ODF3L1	up
OIP5	up
OR7E91P	up
ORC6	up
ORMDL1	up
OSBPL6	up
OTUB1	up
OTUB2	up
PACRGL	up
PACS1	up
PAK3	up
PAPPA	up
PAQR8	up
PARP11	up
PBK	up
PBX3	up
PCCB	up
PCDH10	up
PCDP1	up
PCSK1N	up
PCYT1B	up
PDE6H	up
PDE7B	up
PDLIM1	up
PDPK1	up
PEA15	up
PEG10	up
PEX19	up
PGBD5	up
PGK1	up
PHLDA1	up
PHLDB1	up
PIGH	up
PIGS	up
PIGZ	up
PIN4	up
PIP4K2C	up
PITX1	up
PITX2	up
PKM2	up
PLA2G1B	up
PLA2G4C	up
PLCD3	up
PLD1	up
PLEKHA5	up
PLEKHA7	up
PLEKHH1	up
PLK1	up
PLK2	up
PLLP	up
PLXDC1	up
PLXNA1	up
PNMA2	up
Pdown1	up
PNPLA6	up
POC1A	up
POC5	up
PODXL2	up
POLR1D	up
POLR2E	up
PPARGC1B	up
PPBP	up
PPM1A	up
PPM1F	up
PPME1	up
PPP1R3F	up
PPP4R4	up
PRC1	up
PRDM10	up
PRELID2	up
PRKRIR	up
PRMT1	up
PRMT3	up
PRPF40B	up
PRR13	up
PRR22	up
PRR3	up
PRSS58	up
PSAP	up
PSD	up
PSD2	up
PSEN2	up
PSMC3IP	up
PSMD10	up
PSME3	up
PTPLAD2	up
PTPN13	up
PTPRN	up
PVRL3	up
RAB11FIP5	up
RAB1B	up
RAB4B	up
RAB5B	up
RAB6B	up
RABGGTA	up
RABL3	up
RACGAP1	up
RAD51AP1	up
RAPGEFL1	up
RBM23	up
RBM45	up
RCCD1	up
RELT	up
RERG	up
RFC3	up
RGAG1	up
RGS18	up
RHOBTB3	up
RIMKLB	up
RIMS3	up
RIMS4	up
RNASEK	up
RND2	up
RND3	up
RNF157	up
RNF5	up
ROR1	up
RPL10	up
RRAGB	up
RRAGD	up
RTN4	up
RUVBL1	up
S100A9	up
SAA2	up
SAA4	up
SAV1	up
SBF1	up
SCAI	up
SCAP	up
SCD	up
SCG3	up
SCMH1	up
SCN1A	up
SCN3B	up
SCN9A	up
SDCBP2	up
SDHB	up
SEC14L4	up
SEC22C	up
SEMA6A	up
SEMA6D	up
SEMA7A	up
SENP3	up
SETD5	up
SETDB2	up
SGK1	up
SH3RF1	up
SHANK1	up
SHC2	up
SHCBP1	up
SHKBP1	up
SIAE	up
SIGLEC10	up
SIGMAR1	up
SIRT2	up
SIX6	up
SKA3	up
SLC12A5	up
SLC13A4	up
SLC16A14	up
SLC20A1	up
SLC22A17	up
SLC22A4	up
SLC24A2	up
SLC25A11	up
SLC25A4	up
SLC26A10	up
SLC26A8	up
SLC26A9	up
SLC27A4	up
SLC29A2	up
SLC30A1	up
SLC32A1	up
SLC35A5	up
SLC35F4	up
SLC37A2	up
SLC38A11	up
SLC39A3	up
SLC41A1	up
SLC6A1	up
SLC8A2	up
SMARCD3	up
SMPD4	up
SNCB	up
SNURF	up
SNX12	up
SNX17	up
SOX6	up
SPAG7	up
SPC25	up
SPEG	up
SPG20OS	up
SPRN	up
SPSB2	up
SPTB	up
SPTBN2	up
SREBF1	up
SREBF2	up
SRF	up
SRGAP2	up
SRGAP2P1	up
SRSF7	up
SSBP2	up
SSBP4	up
ST8SIA5	up
STAMBPL1	up
STARD9	up
STBD1	up
STEAP3	up
STK35	up
STMN4	up
STOML1	up
STRADB	up
STX3	up
STXBP5L	up
SUN3	up
SUSD1	up
SVOP	up
SYK	up
SYNGR1	up
SYTL2	up
TBC1D2B	up
TBCD	up
TBL3	up
TCEAL1	up
TCF19	up
TCN2	up
TCOF1	up
TCP1	up
TERF2	up
TESK2	up
TGOLN2	up
THAP10	up
THOC2	up
THRSP	up
TLN1	up
TM7SF2	up
TMC4	up
TMEM109	up
TMEM115	up
TMEM128	up
TMEM132A	up
TMEM178	up
TMEM18	up
TMEM180	up
TMEM223	up
TMEM229B	up
TMEM231	up
TMEM35	up
TMEM97	up
TMIE	up
TMPRSS9	up
TMSB15B	up
TNFRSF21	up
TOR3A	up
TPI1	up
TPI1P2	up
TPST2	up
TPX2	up
TRAFD1	up
TRAIP	up
TRIM49	up
TRIM74	up
TRIM9	up
TRIOBP	up
TRNT1	up
TSC22D3	up
TSPAN33	up
TSR2	up
TTC23	up
TTF2	up
TUBA1C	up
U2AF1L4	up
UBA1	up
UBA7	up
UBAP1	up
UBE2C	up
UBE2E3	up
UBE2N	up
UBE2S	up
UBE2T	up
UBE3B	up
UBL7	up
UHRF2	up
UNC119	up
UNG	up
UQCR10	up
USP35	up
USP46	up
UTP14A	up
VAT1	up
VEGFC	up
WBP2	up
WDR25	up
WDR47	up
WDR82	up
WHSC1	up
WWP2	up
XRCC2	up
YEATS4	up
YPEL1	up
ZBTB22	up
ZCCHC18	up
ZDHHC12	up
ZFHX2	up
ZFYVE19	up
ZMAT5	up
ZMYM3	up
ZNF124	up
ZNF135	up
ZNF177	up
ZNF238	up
ZNF385A	up
ZNF385B	up
ZNF541	up
ZNF665	up
ZNF681	up
ZNF738	up
ZNF75D	up
ZNF853	up
ZNF880	up
XIST	up
NEB	up
SSTR1	up
CXCL13	up
ALPK2	up
PTH	up
IGSF21	up
GZMK	up
CACNA2D4	up
GRIK1	up
C15orf48	up
NEUROD2	up
PROM1	up
RASSF6	up
LOC100505912	up
FUT9	up
S100A8	up
SLC7A11	up
KANK4	up
ABCA12	up
OPCML	up
GRIA3	up
LYPD6B	up
GPR64	up
CCL3	up
PF4	up
AGT	up
SCN1B	up
SKINTL	up
SSC5D	up
LMO1	up
CXCR2	up
ZFPM2	up
TMPRSS6	up
CTSE	up
ANKRD24	up
C9orf140	up
CCDC85A	up
ANGPTL7	up
NNAT	up
CIB2	up
MMP16	up
HIST1H1C	up
C1orf54	up
SAMSN1	up
downS1AP	up
AVPR1B	up
LOC644192	up
EBF1	up
LOC439949	up
LOC100507311	up
SAA1	up
FREM1	up
RGS4	up
LYPD6	up
BMP6	up
PCDH9	up
UG0898H09	up
FAM155B	up
S100A12	up
CLMP	up
GPA33	up
RALYL	up
ZNF804A	up
KCNIP1	up
AQP9	up
PRR15L	up
NDST4	up
MMP25	up
CORO6	up
RAB26	up
SPAG5	up
C6orf25	up
MBL1P	up
GJC1	up
PACSIN1	up
KIAA1211	up
GHR	up
GLUL	up
PRKCQ	up
MIR133A1	up
G6PD	up
FCN1	up
RORB	up
IRF6	up
FPR1	up
MS4A7	up
BCAR3	up
PSRC1	up
MCC	up
COL14A1	up
FKBP5	up
KCNH5	up
AFP	up
KIRREL3	up
MAPK12	up
C1orf187	up
CCL3L3	up
MIB1	up
NIM1	up
ZBTB16	up
MLF1	up
B3GALTL	up
S100P	up
SERPINF1	up
NCKAP5	up
SRC	up
LANCL3	up
VSTM4	up
EXPH5	up
LOC100288911	up
LRRN1	up
PLCD4	up
KDM1B	up
H19	up
CMTM2	up
MNDA	up
CCL4	up
EPHA3	up
SYT9	up
YSK4	up
SLC44A4	up
DARC	up
MYH7	up
SRRM4	up
MAB21L1	up
NR2F2	up
HCN1	up
TBC1D4	up
C1orf186	up
DDIT4L	up
SGCZ	up
RAB7B	up
MMP12	up
TMEM108	up
BLCAP	up
TMEM2	up
POP1	up
IL1R2	up
LOC100652944	up
HIST1H1D	up
ITGA4	up
TPM1	up
LOC440132	up
APOC2	up
PCBP3	up
FPR2	up
UPP2	up
ANK1	up
DPF3	up
CDC42EP4	up
PRRX1	up
CPNE9	up
LAPTM5	up
LAPTM4B	up
CA14	up
SLC22A16	up
GPR34	up
CDH20	up
GFOD1	up
MAFB	up
ELAVL4	up
TSC2	up
NCF1	up
RHOU	up
ONECUT2	up
EHD3	up
GRM8	up
GRAMD2	up
C12orf48	up
SLC25A25	up
CNKSR3	up
FGR	up
LTA4H	up
SGK494	up
TP53BP2	up
BCL2A1	up
TRIM62	up
LRRC7	up
C5orf27	up
TIPARP	up
CCNF	up
ADAMTS8	up
KIAA0664	up
PRKCG	up
ITGA2B	up
ENTPD3	up
RASA4P	up
CA9	up
RPS6KA5	up
CXCR2P1	up
ZNF365	up
MMP15	up
SLC29A1	up
VAV3	up
PTAFR	up
GAPT	up
MAPK11	up
ELOVL5	up
INSM1	up
CCNG2	up
PRKCD	up
NDUFA4L2	up
OGFRL1	up
CSF2RA	up
ATAD2	up
UNC5A	up
KPTN	up
ALB	up
ABCA2	up
EMB	up
SIGLEC8	up
CSF3R	up
SLC17A1	up
CALML4	up
C1orf95	up
EPB41L2	up
HIF3A	up
PCK2	up
EPHA7	up
PRKD3	up
FAM101B	up
ADRB2	up
PFKFB2	up
AP1G2	up
DOK3	up
USP2	up
WNK2	up
PF4V1	up
STK17B	up
STX1A	up
TP53AIP1	up
EMR3	up
CCNB2	up
MIDN	up
PLXNC1	up
EMR2	up
PRKAB2	up
CHAF1B	up
E2F2	up
CD53	up
OLFML2B	up
RHBDL2	up
SUPT6H	up
FAM111B	up
CHKA	up
MAPK8IP1	up
PDE4DIP	up
CD163L1	up
ITGB3	up
ATP5E	up
TMEM184A	up
BIRC5	up
PKD1	up
DAND5	up
AOAH	up
NME9	up
ADORA3	up
MS4A6A	up
ACSL1	up
GAS2	up
SLC26A2	up
TEKT5	up
KLHL17	up
TOP2A	up
MAK	up
COL25A1	up
FGD6	up
DDIT4	up
ERAP2	up
LILRB3	up
C1orf145	up
LRRC25	up
P2RY13	up
SESN3	up
DOK4	up
SEMA4G	up
KLF13	up
IL34	up
KRTAP6-3	up
SLC7A7	up
GAMT	up
RILP	up
ROGDI	up
STARD5	up
MGLL	up
HDAC10	up
CLTCL1	up
HOMER2	up
NAIP	up
OSBPL1A	up
ZNF189	up
CD209	up
DUSP27	up
FGFBP2	up
SLC11A1	up
TROAP	up
VPS53	up
IGFBPL1	up
FGF12	up
ADAM11	up
FANCA	up
TNF	up
43355	up
ACCN3	up
SERINC2	up
CXCR1	up
ASPH	up
ITGAD	up
TMEM135	up
ADD2	up
LOC79015	up
OSBPL7	up
PPM1E	up
HPS3	up
ARRDC1	up
ANKRD22	up
TGFBR3	up
GREB1	up
NIN	up
TK1	up
PLEK	up
SSX2IP	up
CFP	up
TMEM145	up
EBI3	up
ITGA6	up
LGALS3BP	up
D4S234E	up
CDHR3	up
RPGRIP1	up
MLXIP	up
KCNQ5	up
LIMA1	up
MKNK2	up
RAB15	up
HTR3A	up
CEACAM4	up
JAK2	up
TREML1	up
MAN2A1	up
ULK1	up
C1orf110	up
ProSAPiP1	up
ADAMTS14	up
SH3GLB2	up
ATP8A1	up
MALT1	up
SIDT2	up
KCND1	up
C20orf112	up
NEK2	up
ELAVL2	up
SLC19A2	up
PHKA1	up
CRIP2	up
DAPP1	up
ENAH	up
PRIM2	up
ARHGEF6	up
PDE5A	up
SPATA9	up
SPIRE2	up
ABCA1	up
LILRA4	up
LIFR	up
SELPLG	up
ASPM	up
UNC13B	up
HCK	up
RRM2	up
UACA	up
TUBB1	up
EPHB2	up
C20orf132	up
LSMD1	up
PLB1	up
C1orf38	up
NRG3	up
ESR2	up
LDHA	up
SLC4A2	up
MYLIP	up
SESN1	up
ANGPTL5	up
COG2	up
CCDC126	up
MAPRE2	up
CLPB	up
Adown10	up
C10orf58	up
MAP2K1	up
CEP85	up
REG1B	up
MID1IP1	up
ZNF300	up
MAN2A2	up
C16orf59	up
ODZ3	up
ASAP1	up
PKMYT1	up
TRIM3	up
CD300A	up
ACAP3	up
HIST1H2AA	up
LPCAT3	up
METAP1	up
SNX33	up
SYCE3	up
C1orf74	up
FAM127B	up
TMEM8A	up
POR	up
LOC100506495	up
KLF9	up
NLRP12	up
RNPC3	up
GALNT11	up
MYO1F	up
PCDHB17	up
ELAC2	up
TEX2	up
FBXO2	up
HEXDC	up
TREM1	up
LOC641467	up
ATP1B1	up
ARHGAP19	up
STK39	up
HOXD4	up
SPATA2	up
KLHDC7B	up
PTOV1	up
IL16	up
MAMDC4	up
KIAA2013	up
PRKAB1	up
FAM78B	up
AMY1C	up
SLC7A4	up
SNX10	up
LRRC48	up
APOBEC3B	up
ARHGAP9	up
USP5	up
RASSF5	up
FERMT3	up
LINC00204B	up
FAM78A	up
USP24	up
TRAM1L1	up
MYO9A	up
CD36	up
ZNF251	up
CANT1	up
CD6	up
GHRL	up
CSRNP1	up
GAB1	up
C6orf204	up
TNFRSF12A	up
CIAPIN1	up
ADPRHL1	up
TIGIT	up
AGPAT6	up
HK3	up
SOCS1	up
H6PD	up
MTCH1	up
43354	up
CRIM1	up
GCLC	up
PPP1CB	up
SUSD5	up
C6orf145	up
HIBADH	up
TANC1	up
MAP3K14	up
CLYBL	up
LRG1	up
C1orf228	up
LOC100233156	up
RNF123	up
FUT1	up
REC8	up
PRR24	up
BACH1	up
CAPN10	up
FAM193B	up
PER3	up
EVI2B	up
MRFAP1	up
PIK3R3	up
ST3GAL2	up
ATP2B2	up
MED14	up
EVI2A	up
LOC100652876	up
SNX7	up
SPC24	up
LOC100506779	up
MPZL3	up
GRAMD1A	up
PLXNA3	up
PITHD1	up
AP1B1	up
SEC22A	up
TRIM50	up
CDKN2AIPNL	up
MXD4	up
PLEKHM3	up
ATP8B3	up
COQ6	up
NAPA	up
FLJ35424	up
MGC16703	up
ST3GAL3	up
C9orf114	up
DLG1	up
ST6GALNAC1	up
IFITM10	up
NTN5	up
BRD9	up
NDUFA10	up
RCL1	up
BTK	up
TOM1L1	up
C22orf39	up
ASB6	up
PRKG2	up
TBC1D16	up
CPSF3L	up
PPP6R2	up
GEN1	up
ECHS1	up
ZNF93	up
RCAN2	up
DVL1	up
DBNDD1	up
ZNF423	up
STXBP5	up
SETD1A	up
PCSK7	up
BCR	up
NAT10	up
TAF6L	up
PEAK1	up
TNFSF13B	up
DISP2	up
DHFR	up
CSGALNACT2	up
FHDC1	up
GPR137	up
URB2	up
STS	up
SH3BGRL2	up
CARD14	up
C19orf51	up
H1FX	up
MAST4	up
TTC28	up
CBX4	up
LOC283588	up
ITSN1	up
MED27	up
SSBP3	up
MASP1	up
KLHL6	up
C4orf43	up
WIPF1	up
RECQL4	up
ERF	up
R3HDM2	up
RIPPLY1	up
MSR1	up
LRPAP1	up
LYPLA2	up
DMXL2	up
TMEM50A	up
GALE	up
FAM125A	up
C19orf43	up
SCN3A	up
IL6ST	up
LYSMD2	up
SPSB3	up
ATXN7L2	up
PPP5C	up
ALDOA	up
C4orf19	up
C9orf86	up
C6orf89	up
FMNL1	up
FAM160A2	up
KCNH2	up
ACOT11	up
NEK8	up
PPP2R1B	up
RAB8B	up
KCNC1	up
NDUFS2	up
NLRP1	up
PLEKHH3	up
PLIN1	up
DHPS	up
FAM110B	up
MT1G	up
SH3TC1	up
NFE4	up
SERINC3	up
SCAMP3	up
PAFAH1B3	up
VPS37B	up
ADAMTS9	up
FADS3	up
STAG3L4	up
TBC1D7	up
LOC100507280	up
TREML2	up
ALDOAP2	up
C4orf46	up
PDE8A	up
ANKRD13B	up
TIGD2	up
NS3BP	up
DECR1	up
LOC100505933	up
KCNC3	up
HPX	up
OXR1	up
QARS	up
APIP	up
NCDN	up
KDM6A	up
FAM190A	up
PEX2	up
TMED4	up
TMEM53	up
ARFRP1	up
SRRM2	up
PDE4D	up
SLC25A1	up
TXLNA	up
SSH2	up
ACACA	up
USP54	up
LOC285074	up
KCTD16	up
SMYD2	up
UBASH3B	up
CDK14	up
ITGA3	up
NPNT	up
ZNF513	up
CADM2	up
KLHL21	up
KDELC2	up
MTBP	up
TCF4	up
LAIR1	up
MED26	up
SDHD	up
PLEC	up
CROCCP2	up
ACACB	up
RFC2	up
TUBB4B	up
FBXL7	up
TMCC2	up
OSGEPL1	up
SMAD2	up
GAS2L1	up
LOC100505909	up
CHD3	up
PTPN9	up
PGD	up
ASNA1	up
EME2	up
GPR162	up
SNX16	up
CD300C	up
CD72	up
KDM6B	up
RAD23A	up
MRPL28	up
PSMD9	up
CIRBP	up
PFKM	up
ATP2C1	up
ACOX3	up
NPAS1	up
GSTO2	up
MCAM	up
NCF4	up
RGS19	up
NUP155	up
TTC31	up
ADI1	up
DCAF10	up
TYK2	up
CLASP2	up
HAUS5	up
PTCRA	up
CASP14L	up
KIAA1383	up
PARP6	up
ATAT1	up
SPAG9	up
SMARCD2	up
LOC401127	up
OXTR	up
XAGE2B	up
CD70	up
C8orf73	up
ZCCHC4	up
PAK1	up
PXDNL	up
FBXL6	up
JKAMP	up
CYHR1	up
SPATS2	up
EFHA2	up
HIST1H2AJ	up
REEP3	up
GFER	up
ATP5A1	up
PEX11A	up
TBC1D2	up
GPT	up
ZNF76	up
FAM107B	up
ZNF706	up
CBFB	up
MAN2B2	up
SLC48A1	up
LOC158402	up
STK36	up
TNFRSF8	up
ANAPC1	up
STOML2	up
GTF2IRD1	up
TECR	up
PCDHB6	up
LPHN1	up
C5AR1	up
ENTPD4	up
HAGHL	up
CHD1L	up
METTL22	up
ZC3H12D	up
CBX8	up
BCL7B	up
BMF	up
NT5C3	up
FECH	up
METTL13	up
ACVR1	up
VWA5A	up
WBP4	up
URM1	up
CDAN1	up
TCEB1	up
GAPDH	up
UNC80	up
FAM173B	up
CLASRP	up
OTX1	up
SORT1	up
TMEM199	up
MLX	up
RFESD	up
EIF4H	up
DDX5	up
LOC100506012	up
POLQ	up
TPMT	up
PHF19	up
USP19	up
PRUNE	up
HIST1H2BN	up
TONSL	up
PGS1	up
HIP1	up
GPR84	up
AS3MT	up
KIAA0090	up
LRRN2	up
BIN2	up
GSK3B	up
ACRBP	up
CDK5RAP1	up
STAU2	up
KY	up
MSTO1	up
ADIPOR1	up
UQCC	up
LYRM7	up
MARS	up
C12orf70	up
CARKD	up
CCBL1	up
MAP4	up
ABCA7	up
TOP3B	up
TRIO	up
ADD3	up
KIAA0368	up
COX4I1	up
SLC38A10	up
AP3M1	up
CTC1	up
PRDX3	up
LRCH1	up
FCHSD2	up
PIK3C2B	up
TCEB3	up
RAD18	up
DDX41	up
IL5RA	up
CYTH2	up
SHMT1	up
LPP	up
DKFZP434I0714	up
G6PC3	up
MAPK10	up
PDXP	up
FAM117B	up
SH2B1	up
MRPL38	up
CIC	up
GSG2	up
ANAPC2	up
CYB5R4	up
KIAA0913	up
STIM1	up
CDA	up
SNUPN	up
GTPBP2	up
ACOT1	up
RICTOR	up
SLC9B1	up
C9orf5	up
L3MBTL2	up
KBTBD3	up
LOC388152	up
DENR	up
GRHPR	up
IMMP2L	up
COQ9	up
SLC2A4RG	up
OGDHL	up
OXA1L	up
PNPLA2	up
SNAI3	up
GSTZ1	up
SETDB1	up
PXN	up
NRXN1	up
SLC8A1	up
GNB2	up
MED23	up
C1orf122	up
CCDC138	up
GPATCH8	up
NPLOC4	up
TPCN2	up
FAM190B	up
GATAD2A	up
TNKS1BP1	up
ME2	up
TADA2B	up
DNAH6	up
CHAC2	up
PI3	up
NPDC1	up
SPNS3	up
EPS15L1	up
ANKRD16	up
MRPL46	up
PSKH1	up
ZNF134	up
CENPO	up
ELK3	up
SNAP25	up
C10orf81	up
CAMSAP1	up
APC	up
SIN3A	up
TRIM37	up
BTG1	up
NCR1	up
DHX35	up
BBIP1	up
PCBP2	up
CD47	up
UCKL1	up
UBR4	up
CCDC24	up
SNAP23	up
CCNT2	up
TUBGCP6	up
SMG8	up
SAE1	up
VPS52	up
RALGAPA2	up
43162	down
43163	down
43351	down
A4GALT	down
AADAT	down
AATK	down
ABCG2	down
ACADM	down
ACBD5	down
ACPL2	down
ACSS1	down
ACTA1	down
ACTR3B	down
ADAM28	down
ADAMTS12	down
ADAMTS18	down
ADCYAP1R1	down
ADH1A	down
ADH1C	down
Adown6	down
ADRA2C	down
ADSSL1	down
AFF2	down
AFF3	down
AFMID	down
AGAP7	down
AGMAT	down
AGPAT9	down
AGR2	down
AGR3	down
AIF1L	down
AK5	down
AKAP1	down
AKAP12	down
AKAP13	down
AKR1C1	down
ALCAM	down
ALDH1A2	down
ALDH1A3	down
ALDH1L2	down
ALDH2	down
ALDOB	down
ALK	down
AMD1	down
AMDHD1	down
AMN	down
AMOTL1	down
AMZ1	down
ANG	down
ANGPT1	down
ANKRD2	down
ANKRD20A5P	down
ANKRD23	down
ANKRD36	down
ANKRD37	down
ANKRD42	down
ANKRD43	down
ANXA2	down
ANXA2P3	down
AP1S2	down
AP3B1	down
AP3S1	down
APBB2	down
APLN	down
APOA1	down
APOL1	down
APOL2	down
APOL4	down
AQP2	down
ARC	down
ARCN1	down
ARG2	down
ARHGAP18	down
ARHGAP36	down
ARHGAP44	down
ARHGDIG	down
ARHGEF10	down
ARHGEF26	down
ARHGEF35	down
ARHGEF5	down
ARID3A	down
ARID5B	down
ARL17B	down
ARL4A	down
ARMCX1	down
ARPP21	down
ARRDC3	down
ARRDC4	down
ARSD	down
ARVCF	down
ASAP2	down
ASCL1	down
ASPG	down
ASPHD1	down
ASPHD2	down
ASPRV1	down
ASS1	down
ASTL	down
ASTN1	down
ATAD3C	down
ATF3	down
ATG9B	down
ATP11A	down
ATP11B	down
ATP13A2	down
ATP13A4	down
ATP1A2	down
ATP2B3	down
ATP5G2	down
ATP6V1C2	down
ATP8B1	down
ATP8B2	down
AVP	down
AVPI1	down
AXIN2	down
B3GALNT2	down
B3GNT5	down
B3GNT9	down
B4GALT1	down
B4GALT5	down
BAALC	down
BACH2	down
BAG1	down
BAGE	down
BAIAP3	down
BAMBI	down
BASP1	down
BATF2	down
BBC3	down
BBOX1	down
BCAM	down
BCAT1	down
BCHE	down
BCL2	down
BEND7	down
BEX5	down
BFSP2	down
BHLHE22	down
BHLHE23	down
BHMT	down
BHMT2	down
BMP7	down
BMP8B	down
BNC2	down
BOK	down
BPNT1	down
BRP44L	down
BRSK2	down
BTC	down
BTG2	down
BTN2A1	down
BTN3A3	down
BTNL2	down
BUB3	down
BVES	down
C10orf11	down
C10orf118	down
C10orf125	down
C10orf47	down
C10orf67	down
C10orf82	down
C11orf74	down
C11orf75	down
C11orf9	down
C12orf26	down
C12orf29	down
C12orf34	down
C12orf63	down
C12orf68	down
C15orf27	down
C16orf11	down
C16orf82	down
C16orf89	down
C16orf93	down
C17orf72	down
C17orf76-AS1	down
C18orf1	down
C18orf45	down
C19orf33	down
C1GALT1C1	down
C1orf114	down
C1orf168	down
C1orf194	down
C1orf93	down
C1orf96	down
C1QTNF4	down
C20orf108	down
C20orf141	down
C20orf195	down
C20orf201	down
C20orf26	down
C20orf3	down
C22orf23	down
C2orf55	down
C2orf77	down
C3orf25	down
C3orf52	down
C3orf78	down
C4orf26	down
C4orf34	down
C4orf47	down
C5orf24	down
C5orf39	down
C5orf4	down
C6orf118	down
C6orf132	down
C6orf146	down
C6orf192	down
C6orf225	down
C6orf26	down
C6orf52	down
C7orf23	down
C7orf31	down
C7orf41	down
C7orf50	down
C7orf58	down
C8orf34	down
C8orf48	down
C8orf56	down
C8orf68	down
C8orf83	down
C8orf84	down
C9orf116	down
C9orf135	down
C9orf150	down
C9orf163	down
C9orf3	down
CA12	down
CA3	down
CA4	down
CABIN1	down
CABYR	down
CACNA1B	down
CACNA1E	down
CACNA1I	down
CADPS2	down
CALB2	down
[truncated: 1,600 more rows]
