# Supplementary material for: Quantitative Analysis of Proteome in Non-functional Pituitary Adenomas: Clinical Relevance and Potential Benefits for the Patients
Source: Front Endocrinol (Lausanne). 2019 Dec 5;10:854. doi: 10.3389/fendo.2019.00854 (PMC6915109; doi:10.3389/fendo.2019.00854)
Supplement: Supplementary file 6 [file Table_6.xls]

## Sheet: Sheet 1
Supplemental Table 6. 1088 overlapped molecules (DEGs; proteins) between 3598 DEGs and 6076 proteins in NFPAs.
Genes/proteins	Alteration
SLC30A1	up
SRSF7	up
FARP2	up
NIT2	up
DBNL	up
DYNC1I1	up
SSBP4	up
UBL7	up
SPAG7	up
FAAH	up
SLC25A4	up
SIRT2	up
CNTN1	up
LRPPRC	up
RFC3	up
GM2A	up
KDM1A	up
ARFGAP2	up
ARMC10	up
FABP3	up
TERF2	up
UTP14A	up
RAB5B	up
ALOX12	up
POLR1D	up
MANEAL	up
CDS1	up
MAPK9	up
NAP1L1	up
PPM1A	up
DNPEP	up
THOC2	up
DNAJC19	up
GNA12	up
EPB41L1	up
APH1A	up
LRRC16A	up
SCAP	up
RCCD1	up
ARL6IP1	up
ARHGEF2	up
PSD	up
GPT2	up
ATCAY	up
RAB4B	up
MOSPD2	up
UBE3B	up
SLC25A11	up
NDUFA1	up
HCCS	up
MAT2A	up
OBSL1	up
LPCAT4	up
IMPDH1	up
PNPLA6	up
FXR1	up
AKR1B1	up
TBL3	up
SNX17	up
TRNT1	up
AKT3	up
WWP2	up
SMPD4	up
PGBD5	up
SPTBN2	up
PPM1F	up
PDPK1	up
RUVBL1	up
ROR1	up
CUL3	up
GRK6	up
LRRC41	up
TGOLN2	up
UBA1	up
LPIN2	up
WDR47	up
HPS1	up
GBA2	up
RABL3	up
KALRN	up
MOAP1	up
EXOC7	up
ALAD	up
PRMT1	up
GTPBP6	up
RRAGD	up
TMEM115	up
HADH	up
SCG3	up
TRIM9	up
UNC119	up
PEA15	up
VAT1	up
SPTB	up
YEATS4	up
PEX19	up
CDIPT	up
ARHGEF12	up
M6PR	up
IPO13	up
SDHB	up
TMEM223	up
CXorf57	up
KAT7	up
PSMD10	up
WDR82	up
DOCK5	up
UNG	up
COG8	up
CAMK2G	up
SHCBP1	up
SENP3	up
BCKDK	up
MRPL10	up
ARHGAP1	up
GNPDA1	up
RPL10	up
SBF1	up
TOR3A	up
DBF4B	up
SLC27A4	up
TCP1	up
ACTR1B	up
KIF1B	up
CLDN9	up
CHID1	up
BTD	up
EPB41L5	up
BCLAF1	up
CISD2	up
HIF1AN	up
CYC1	up
TMEM231	up
GNB5	up
RAB1B	up
PSME3	up
HIST1H2BJ	up
OCRL	up
TMEM97	up
TBC1D2B	up
PTPN13	up
MACROD2	up
SIX6	up
GRIA4	up
DCAF7	up
PTPRN	up
SCAI	up
POLR2E	up
ERLIN1	up
CENPA	up
CPLX2	up
HSPA8	up
ATP2A2	up
SIAE	up
PPME1	up
UBE2N	up
ACSL6	up
RTN4	up
MED12	up
UBA7	up
PACS1	up
ADAM22	up
OTUB1	up
CHST5	up
AKT1	up
DCK	up
HLA-A	up
TMEM128	up
TBCD	up
GSTM2	up
CTSD	up
TMC4	up
WBP2	up
DHRS11	up
ATP5B	up
FLOT2	up
COX7B	up
SSBP2	up
PHLDB1	up
MAPRE3	up
PCCB	up
KIF1A	up
OAS3	up
PPP1R3F	up
RAB6B	up
SVOP	up
ACO2	up
CNRIP1	up
RBM45	up
SLC8A2	up
USP35	up
ERO1L	up
STXBP5L	up
MAGED2	up
FCGR2A	up
PCSK1N	up
LAMP2	up
TLN1	up
GLCE	up
MANEA	up
ACSL4	up
BHLHE41	up
SLC22A17	up
MECP2	up
NSDHL	up
TMEM109	up
ITIH5	up
CSNK1E	up
AIFM2	up
BST1	up
UQCR10	up
C14orf1	up
AVL9	up
FIG4	up
TRIOBP	up
LUZP1	up
JAKMIP2	up
AES	up
NMNAT3	up
CALM1	up
LGMN	up
PSAP	up
ARHGEF11	up
PIP4K2C	up
SCD	up
FADS2	up
STEAP3	up
ADAM15	up
MCM2	up
BSCL2	up
TPI1	up
MCU	up
RAB11FIP5	up
GPAA1	up
NLGN2	up
RBM23	up
CLCN5	up
ARHGAP32	up
ARAF	up
CADM3	up
PGK1	up
CYP27A1	up
CSRP1	up
MAST2	up
SMARCD3	up
RHOBTB3	up
CERS6	up
STX3	up
GSTCD	up
PNMA2	up
GPD1	up
IQGAP2	up
PIGS	up
MEGF8	up
SYK	up
RABGGTA	up
IDS	up
IGSF8	up
PSEN2	up
SAA4	up
CKMT1A	up
SLC24A2	up
IGF2BP2	up
MPP2	up
ARHGAP24	up
NAV1	up
PLEKHA5	up
MAOB	up
TSC22D3	up
PAK3	up
KCNA4	up
SNCB	up
MIOS	up
TM7SF2	up
OSBPL6	up
ITPR2	up
CAB39L	up
SEC14L4	up
PPBP	up
APBA1	up
CASK	up
EPS8	up
SLC12A5	up
CTSS	up
ZMYM3	up
SNX12	up
LSAMP	up
CSRP2	up
PCYT1B	up
PLCD3	up
STBD1	up
PLEKHA7	up
SLC10A4	up
B4GALNT1	up
PEG10	up
BTBD11	up
CLU	up
BSPRY	up
S100A9	up
GAL3ST3	up
ENO2	up
CCDC69	up
PDLIM1	up
MAD2L1	up
SYNGR1	up
CYP11A1	up
TCN2	up
ADCY5	up
COL2A1	up
MAOA	up
CRABP1	up
CRABP2	up
GNB3	up
FSTL5	up
PVRL3	up
HPCAL4	up
SLC32A1	up
ETNK2	up
GAL3ST1	up
GALNT12	up
CDK18	up
EPHA10	up
NECAB1	up
IDH1	up
SEMA7A	up
VPS52	up
SAE1	up
SMG8	up
TUBGCP6	up
CCNT2	up
SNAP23	up
UBR4	up
UCKL1	up
CD47	up
PCBP2	up
DHX35	up
SIN3A	up
SNAP25	up
MRPL46	up
EPS15L1	up
NPDC1	up
ME2	up
TNKS1BP1	up
NPLOC4	up
GPATCH8	up
MED23	up
GNB2	up
SLC8A1	up
NRXN1	up
PXN	up
SETDB1	up
GSTZ1	up
OXA1L	up
OGDHL	up
COQ9	up
IMMP2L	up
GRHPR	up
ACOT1	up
CDA	up
STIM1	up
MRPL38	up
SH2B1	up
PDXP	up
MAPK10	up
LPP	up
SHMT1	up
CYTH2	up
DDX41	up
TCEB3	up
LRCH1	up
PRDX3	up
AP3M1	up
SLC38A10	up
COX4I1	up
ADD3	up
TRIO	up
ABCA7	up
MAP4	up
CCBL1	up
CARKD	up
MARS	up
GSK3B	up
BIN2	up
HIP1	up
PGS1	up
PRUNE	up
USP19	up
TPMT	up
DDX5	up
EIF4H	up
TMEM199	up
SORT1	up
FAM173B	up
UNC80	up
GAPDH	up
TCEB1	up
URM1	up
VWA5A	up
METTL13	up
FECH	up
CBX8	up
CHD1L	up
C5AR1	up
LPHN1	up
TECR	up
STOML2	up
ANAPC1	up
MAN2B2	up
CBFB	up
FAM107B	up
ATP5A1	up
GFER	up
REEP3	up
PAK1	up
SMARCD2	up
SPAG9	up
CLASP2	up
DCAF10	up
NUP155	up
RGS19	up
NCF4	up
MCAM	up
ACOX3	up
ATP2C1	up
PFKM	up
CIRBP	up
PSMD9	up
MRPL28	up
RAD23A	up
ASNA1	up
PGD	up
PTPN9	up
CHD3	up
SMAD2	up
OSGEPL1	up
TMCC2	up
TUBB4B	up
RFC2	up
PLEC	up
TCF4	up
KDELC2	up
CADM2	up
NPNT	up
ITGA3	up
CDK14	up
UBASH3B	up
SMYD2	up
ACACA	up
TXLNA	up
SLC25A1	up
SRRM2	up
ARFRP1	up
TMED4	up
NCDN	up
APIP	up
QARS	up
OXR1	up
HPX	up
DECR1	up
VPS37B	up
PAFAH1B3	up
SCAMP3	up
DHPS	up
NDUFS2	up
RAB8B	up
ACOT11	up
KCNH2	up
FMNL1	up
C6orf89	up
ALDOA	up
PPP5C	up
LYSMD2	up
IL6ST	up
C19orf43	up
GALE	up
DMXL2	up
LYPLA2	up
LRPAP1	up
MSR1	up
SSBP3	up
MED27	up
TTC28	up
SH3BGRL2	up
STS	up
URB2	up
DISP2	up
TAF6L	up
NAT10	up
BCR	up
SETD1A	up
STXBP5	up
ECHS1	up
PPP6R2	up
CPSF3L	up
PRKG2	up
TOM1L1	up
BTK	up
RCL1	up
NDUFA10	up
DLG1	up
NAPA	up
COQ6	up
PLEKHM3	up
SEC22A	up
AP1B1	up
PITHD1	up
PLXNA3	up
GRAMD1A	up
SNX7	up
MED14	up
ATP2B2	up
RNF123	up
LRG1	up
CLYBL	up
TANC1	up
HIBADH	up
PPP1CB	up
GCLC	up
MTCH1	up
H6PD	up
ADPRHL1	up
CIAPIN1	up
CANT1	up
CD36	up
USP24	up
FERMT3	up
USP5	up
KIAA2013	up
PTOV1	up
STK39	up
ATP1B1	up
FBXO2	up
ELAC2	up
MYO1F	up
GALNT11	up
RNPC3	up
POR	up
METAP1	up
LPCAT3	up
TRIM3	up
ASAP1	up
MAN2A2	up
MAP2K1	up
ANO10	up
CLPB	up
MAPRE2	up
COG2	up
SLC4A2	up
LDHA	up
TUBB1	up
UACA	up
SELPLG	up
PDE5A	up
ENAH	up
CRIP2	up
PHKA1	up
MALT1	up
ATP8A1	up
SH3GLB2	up
MAN2A1	up
TREML1	up
LIMA1	up
LGALS3BP	up
ITGA6	up
PLEK	up
TGFBR3	up
ADD2	up
TMEM135	up
ASPH	up
VPS53	up
NAIP	up
MGLL	up
ROGDI	up
GAMT	up
SESN3	up
ERAP2	up
SLC26A2	up
ACSL1	up
ITGB3	up
PDE4DIP	up
MAPK8IP1	up
SUPT6H	up
PRKAB2	up
STX1A	up
WNK2	up
DOK3	up
PFKFB2	up
FAM101B	up
PCK2	up
EPB41L2	up
ABCA2	up
ALB	up
NDUFA4L2	up
PRKCD	up
INSM1	up
ELOVL5	up
MAPK11	up
SLC29A1	up
RPS6KA5	up
ITGA2B	up
PRKCG	up
LRRC7	up
LTA4H	up
FGR	up
SLC25A25	up
EHD3	up
TSC2	up
ELAVL4	up
GFOD1	up
CDH20	up
ANK1	up
PCBP3	up
APOC2	up
TPM1	up
ITGA4	up
TMEM2	up
MAB21L1	up
MYH7	up
SLC44A4	up
MNDA	up
SRC	up
SERPINF1	up
S100P	up
B3GALTL	up
MIB1	up
MAPK12	up
FKBP5	up
COL14A1	up
MCC	up
G6PD	up
GLUL	up
KIAA1211	up
PACSIN1	up
RALYL	up
S100A12	up
SAA1	up
ANKRD24	up
SSC5D	up
SKINTL	up
AGT	up
PF4	up
S100A8	up
CACNA2D4	up
NEB	up
GH1	down
GAL	down
POU1F1	down
POMC	down
NEFM	down
NEFL	down
PLCXD3	down
PCK1	down
FCN2	down
OGN	down
BCAT1	down
SPON1	down
FOS	down
NDNF	down
TTR	down
TTN	down
THBS4	down
THBS2	down
ALDOB	down
PYCR1	down
GLDC	down
PDLIM4	down
TLN2	down
ANGPT1	down
SORBS2	down
C1QTNF4	down
GNAS	down
PI16	down
DOCK11	down
PAPLN	down
LIN7A	down
GPM6B	down
GPRC5B	down
TMEM163	down
PTPRK	down
ENPP1	down
METTL7A	down
TMEM63B	down
EGFL6	down
TES	down
KRT18	down
ALDH1L2	down
SCIN	down
KRT85	down
IGFBP5	down
FAM49A	down
EMP2	down
HSPA1A	down
EZR	down
ITPR3	down
BUB3	down
CDR2L	down
MPP7	down
GATM	down
HIP1R	down
DHRS3	down
NSF	down
ITIH2	down
SPATA18	down
TUBB6	down
RRBP1	down
ARHGDIG	down
GALNT5	down
LDLRAP1	down
HSPA2	down
BCAM	down
TNN	down
RAB27A	down
RAB38	down
ESRP1	down
OGDH	down
ATP11A	down
MPO	down
PDIA4	down
DCLK1	down
APOA1	down
SCD5	down
FBN2	down
CD99	down
SRPRB	down
WIPI1	down
CGN	down
ALDH1A2	down
ARVCF	down
ERN1	down
FAM98A	down
PALLD	down
MPST	down
ITGB1	down
RPN1	down
RPL22	down
RELL1	down
SARDH	down
KRT8	down
TUBA8	down
MSI2	down
ZNF462	down
PDLIM5	down
PRUNE2	down
KIAA0513	down
CLDN3	down
DNAJC12	down
HTATSF1	down
ADSSL1	down
RALB	down
JUP	down
CALD1	down
FTCD	down
NCOA7	down
CHGB	down
RAB30	down
FAM120C	down
SLC9A3R2	down
PGM3	down
USP13	down
COCH	down
NANS	down
C7orf50	down
ALDH2	down
SLC12A2	down
FGD4	down
HTATIP2	down
TMX4	down
TP53I3	down
DEPTOR	down
REXO2	down
DNAJC3	down
RABGAP1L	down
LSS	down
ENO3	down
NAB2	down
ASAP2	down
RAB11FIP1	down
LZTFL1	down
DSG2	down
TMEM33	down
FSTL4	down
MAGT1	down
SLC7A14	down
PROZ	down
MPP5	down
SLC16A2	down
ZADH2	down
STX2	down
PPP2R5A	down
MYO5B	down
YPEL2	down
REEP1	down
TOR1AIP2	down
SMARCA2	down
CMIP	down
ANXA2	down
LRRFIP1	down
LMAN1	down
FNDC3B	down
HM13	down
ACTR3B	down
TMTC3	down
FAM8A1	down
POTEE	down
SUGT1	down
SSR3	down
ASS1	down
CA3	down
TMEM106B	down
GPR180	down
LEPRE1	down
MSN	down
MICAL3	down
SYNGR2	down
P4HB	down
SPCS3	down
AP3S1	down
MANF	down
SLC2A1	down
CCP110	down
CHMP2B	down
TST	down
EPHX1	down
NEDD4L	down
UFM1	down
GUSB	down
RAP1B	down
EXOC3L2	down
IKBIP	down
ATP11B	down
PRL	down
RBP4	down
RPS4Y1	down
DDX3Y	down
FSHB	down
BAIAP3	down
DPP6	down
MIA	down
COL22A1	down
AGR2	down
NPTX2	down
COL4A6	down
LGI1	down
HP	down
ALCAM	down
HSD11B1	down
FAM167A	down
GPC4	down
SYT12	down
AGR3	down
SLC27A2	down
PLIN5	down
GFAP	down
CRYM	down
FABP7	down
LAMA1	down
AKAP12	down
TIMP4	down
COL4A4	down
LY6H	down
TF	down
AKR1C1	down
EIF1AY	down
SLC2A13	down
PHYHIP	down
CHGA	down
MYO7A	down
SLC1A2	down
FRAS1	down
KBTBD11	down
PCOLCE2	down
ATP1A2	down
LAMA2	down
ITM2C	down
HSPA12A	down
SPARCL1	down
AIF1L	down
SMPD3	down
NDRG1	down
F5	down
TESC	down
GDA	down
NGEF	down
CA4	down
SHROOM3	down
RAB34	down
COL4A3	down
VAT1L	down
ARHGAP18	down
GALNT7	down
CNTN4	down
ATP2B3	down
ADH1C	down
DYNLRB2	down
CADPS2	down
NDRG2	down
MYO5C	down
ARSD	down
FBLL1	down
CYBRD1	down
HPCAL1	down
FAM114A1	down
MX1	down
BASP1	down
ITGA2	down
ADAM28	down
TPM4	down
OCIAD2	down
SLCO2A1	down
KRT17	down
PHGDH	down
MT3	down
PSD3	down
EPS8L1	down
PEG3	down
LDHB	down
KIF5C	down
SLC12A7	down
PITPNM2	down
OGFR	down
GRHL2	down
DDAH2	down
PRKG1	down
NT5DC3	down
PDE2A	down
MTHFD1L	down
PSAT1	down
ERO1LB	down
LTBP4	down
MTAP	down
BHMT	down
ARG2	down
SLC39A14	down
SYT7	down
SYT5	down
ECM1	down
AMDHD1	down
ACSS1	down
RPL24	down
CYB5A	down
TPPP3	down
SET	down
TRIM47	down
GSN	down
PDIA5	down
TUBA4A	down
RAB27B	down
COTL1	down
CTBP2	down
DDX3X	down
NDN	down
TRAF3	down
ANO6	down
PPFIBP1	down
TMEM123	down
TEKT2	down
CNN3	down
PFKP	down
NDUFAF2	down
ICMT	down
PARP14	down
DIRAS1	down
C1GALT1C1	down
CPNE8	down
CTAGE5	down
FAH	down
NUDT4	down
SUPT3H	down
SLC25A21	down
CYP51A1	down
NACAD	down
COL18A1	down
TIMP1	down
SEC11C	down
AKAP13	down
SPTLC2	down
FAM46C	down
B3GNT9	down
PHYH	down
APOL2	down
MTFP1	down
KIF16B	down
GOLM1	down
PHF6	down
MOB1B	down
ARMCX1	down
COG6	down
PVR	down
GNL3	down
BTN3A3	down
GALNT3	down
CKMT2	down
GALNT10	down
MPP1	down
DDX6	down
QSOX2	down
GLS2	down
CYP2U1	down
FAM3C	down
RPL12	down
ITPR1	down
GSTP1	down
ZNF483	down
DLGAP4	down
PTPRJ	down
MYO5A	down
BAG1	down
CYP7B1	down
RPS7	down
GOPC	down
GNG7	down
CLMN	down
AP3B1	down
CTBS	down
LRRC8D	down
APOL1	down
UGGT2	down
FCN3	down
LGALS8	down
TMEM177	down
RPL31	down
ITPK1	down
UBXN4	down
CBR1	down
NDNL2	down
SLC46A1	down
STARD10	down
RPSA	down
CD274	down
MAN1A2	down
HSPA13	down
ARCN1	down
MYH14	down
CASC4	down
LMBRD2	down
RPL9	down
BTN2A1	down
PIP5K1C	down
SAT2	down
TBC1D10A	down
PLD3	down
RPL7	down
HNRNPA1	down
NRP1	down
BPNT1	down
AKAP1	down
KIAA1324	down
XIAP	down
WDR19	down
AGMAT	down
FOXK1	down
LOXL4	down
CNPY2	down
ACBD5	down
ACADM	down
HSD17B12	down
TCEA1	down
SCFD2	down
SELK	down
PGM5	down
GALK2	down
MLEC	down
PRKAR2B	down
RPS21	down
DNAJB4	down
GNG5	down
DOCK7	down
GCC2	down
KIF13B	down
NME2	down
CALB1	different
COL11A1	different
CPNE6	different
DMD	different
CAMK4	different
SPATA13	different
ARF3	different
AP1AR	different
SRCIN1	different
SYN1	different
CAMKV	different
SPOCK1	different
SDC4	different
APOBEC3G	different
GYG2	different
IL13RA2	different
NR3C1	different
TNXB	different
