# Supplementary material for: Quantitative Analysis of Proteome in Non-functional Pituitary Adenomas: Clinical Relevance and Potential Benefits for the Patients
Source: Front Endocrinol (Lausanne). 2019 Dec 5;10:854. doi: 10.3389/fendo.2019.00854 (PMC6915109; doi:10.3389/fendo.2019.00854)
Supplement: Supplementary file 7 [file Table_7.xls]

## Sheet: Sheet 1
Supplemental Table 7. 162 proteins of 6076 proteins were involved in endocytosis
Protein name	ID number
PDCD6IP	10015
ARPC5	10092
ARPC4	10093
ARPC3	10094
ARPC1B	10095
ARPC2	10109
RNF41	10193
STAM2	10254
ARPC1A	10552
ARFGEF2	10564
ARFGEF1	10565
STAMBP	10617
RAB10	10890
EHD1	10938
RAB35	11021
WWP1	11059
SNF8	11267
VPS26B	112936
VPS45	11311
ARAP1	116985
AGAP1	116987
AGAP3	116988
AP2M1	1173
AP2S1	1175
ZFYVE27	118813
CLTA	1211
CLTB	1212
CLTC	1213
CHMP4B	128866
VPS37A	137492
AP2A1	160
DAB2	1601
AP2A2	161
AP2B1	163
DNM1	1759
DNM2	1785
EPS15	2060
FGFR4	2264
RAB11FIP2	22841
EPN2	22905
NEDD4L	23327
PSD3	23362
PIP5K1C	23396
ACAP2	23527
CHMP2B	25978
DNM3	26052
RAB11FIP5	26056
LDLRAP1	26119
ARFGAP3	26286
SNX5	27131
VPS4A	27183
CHMP2A	27243
AMPH	273
BIN1	274
GRK6	2870
GIT1	28964
CHMP4A	29082
EPN1	29924
SNX12	29934
EHD4	30844
EHD3	30845
EHD2	30846
HLA-A	3105
HLA-B	3106
HLA-C	3107
HLA-F	3134
HRAS	3265
HSPA1A	3303
HSPA2	3306
HSPA8	3312
IGF2R	3482
ARF3	377
KIF5A	3798
KIF5B	3799
KIF5C	3800
ARF5	381
ARF6	382
RHOA	387
ARRB1	408
SMAD2	4087
RAB8A	4218
IQSEC3	440073
ASAP1	50807
VPS36	51028
SH3GLB1	51100
VPS28	51160
CHMP1A	5119
CHMP5	51510
VTA1	51534
CHMP3	51652
VPS29	51699
PML	5371
EPN3	55040
VPS37C	55048
VPS35	55737
ARFGAP1	55738
PRKCI	5584
PARD3	56288
PSD	5662
SH3GLB2	56904
CHMP1B	57132
RAB22A	57403
EPS15L1	58513
SNX6	58533
RAB4A	5867
RAB5A	5868
RAB5B	5869
RAB5C	5878
SMAP1	60682
SH3GL1	6455
SH3GL2	6456
SH3GL3	6457
SMAP2	64744
SNX1	6642
SNX2	6643
SRC	6714
TFRC	7037
TRAF6	7189
TSG101	7251
CXCR4	7852
RAB7A	7879
CHMP6	79643
VPS37B	79720
RAB11FIP1	80223
RUFY1	80230
STAM	8027
ARPC5L	81873
CAPZA1	829
CAPZA2	830
CAPZB	832
ITCH	83737
PIP5K1A	8394
EEA1	8411
VPS25	84313
ARFGAP2	84364
CAV1	857
CAV2	858
CBL	867
CBLB	868
SNX4	8723
SNX3	8724
GBF1	8729
ASAP2	8853
WASL	8976
MVB12B	89853
USP8	9101
RABEP1	9135
HGS	9146
CHMP7	91782
RAB11B	9230
CHMP4C	92421
CYTH2	9266
CYTH1	9267
ZFYVE9	9372
VPS4B	9525
VPS26A	9559
ZFYVE16	9765
IST1	9798
GIT2	9815
DNAJC6	9829
IQSEC1	9922
CDC42	998
