# Supplementary material for: Quantitative Analysis of Proteome in Non-functional Pituitary Adenomas: Clinical Relevance and Potential Benefits for the Patients
Source: Front Endocrinol (Lausanne). 2019 Dec 5;10:854. doi: 10.3389/fendo.2019.00854 (PMC6915109; doi:10.3389/fendo.2019.00854)
Supplement: Supplementary file 8 [file Table_8.xls]

## Sheet: Sheet 1
Supplemental Table 8. 107 proteins of 6076 proteins were involved in the spliceosome pathway
Protein name	ID number
ALYREF	10189
SF3B4	10262
SMNDC1	10285
BCAS2	10286
SF3A1	10291
PPIE	10450
PPIH	10465
CHERP	10523
SLU7	10569
PRPF8	10594
USP39	10713
SRSF10	10772
TXNL4A	10907
TCERG1	10915
SF3A3	10946
SF3B2	10992
LSM6	11157
DDX42	11325
U2AF2	11338
ZMAT2	153527
DDX5	1655
DHX8	1659
DHX15	1665
HNRNPA3	220988
PUF60	22827
NCBP2	22916
SNW1	22938
ACIN1	22985
SNRNP200	23020
U2SURP	23350
SF3B3	23450
SF3B1	23451
PRPF6	24148
LSM4	25804
PRPF31	26121
LSM3	27258
RBMX	27316
PRPF19	27339
TRA2A	29896
HNRNPA1	3178
HNRNPC	3183
HNRNPK	3190
HNRNPU	3192
HSPA1A	3303
HSPA2	3306
HSPA8	3312
HNRNPM	4670
NCBP1	4686
RBMXL1	494115
PCBP1	5093
CRNKL1	51340
CDC40	51362
CWC15	51503
SF3B6	51639
PPIL1	51645
LSM7	51690
LSM8	51691
PLRG1	5356
MAGOHB	55110
PRPF40A	55660
RBM22	55696
CTNNBL1	56259
XAB2	56949
THOC2	57187
ISY1	57461
LSM2	57819
RBM25	58517
SRSF1	6426
SRSF2	6427
SRSF3	6428
SRSF4	6429
SRSF5	6430
SRSF6	6431
SRSF7	6432
TRA2B	6434
SNRNP70	6625
SNRPA	6626
SNRPA1	6627
SNRPB	6628
SNRPB2	6629
SNRPC	6631
SNRPD1	6632
SNRPD2	6633
SNRPD3	6634
SNRPE	6635
U2AF1	7307
DDX39B	7919
SF3A2	8175
THOC3	84321
DHX16	8449
PHF5A	84844
PRPF38A	84950
RBM17	84991
SRSF9	8683
SART1	9092
PRPF4	9128
PRPF3	9129
EFTUD2	9343
SNRNP40	9410
DDX23	9416
AQR	9716
EIF4A3	9775
DHX38	9785
DDX46	9879
CDC5L	988
RBM8A	9939
THOC1	9984
