# Supplementary material for: Quantitative Analysis of Proteome in Non-functional Pituitary Adenomas: Clinical Relevance and Potential Benefits for the Patients
Source: Front Endocrinol (Lausanne). 2019 Dec 5;10:854. doi: 10.3389/fendo.2019.00854 (PMC6915109; doi:10.3389/fendo.2019.00854)
Supplement: Supplementary file 9 [file Table_9.xls]

## Sheet: Sheet 1
Supplemental Table 9. 35 DEGs were involved the focal adhesion pathway
Protein name	ID number
AKT3	10000
COL2A1	1280
COL4A3	1285
COL4A4	1286
COL4A6	1288
AKT1	207
PIP5K1C	23396
LAMA1	284217
GSK3B	2932
XIAP	331
ITGA6	3655
ITGA2	3673
ITGA2B	3674
ITGA3	3675
ITGA4	3676
ITGB1	3688
ITGB3	3690
LAMA2	3908
PAK1	5058
PAK3	5063
PDPK1	5170
PPP1CB	5500
PRKCG	5582
MAPK9	5601
MAPK10	5602
MAP2K1	5604
PXN	5829
RAP1B	5908
TNN	63923
SRC	6714
THBS2	7058
THBS4	7060
TLN1	7094
TNXB	7148
TLN2	83660
