# Supplementary material for: Quantitative Analysis of Proteome in Non-functional Pituitary Adenomas: Clinical Relevance and Potential Benefits for the Patients
Source: Front Endocrinol (Lausanne). 2019 Dec 5;10:854. doi: 10.3389/fendo.2019.00854 (PMC6915109; doi:10.3389/fendo.2019.00854)
Supplement: Supplementary file 10 [file Table_10.xls]

## Sheet: Sheet 1
Supplemental Table 10. 23 DEGs were involved in the cGMP-PKG pathway
Protein name	ID number
AKT3	10000
ADCY5	111
AKT1	207
GNA12	2768
SLC25A4	291
ITPR1	3708
ITPR2	3709
ITPR3	3710
MYH7	4625
ATP1A2	477
ATP1B1	481
ATP2A2	488
ATP2B2	491
ATP2B3	492
PDE2A	5138
PPP1CB	5500
PRKG1	5592
PRKG2	5593
MAP2K1	5604
SLC8A2	6543
SLC8A1	6546
CALM1	801
PDE5A	8654
