# Supplementary material for: Quantitative Analysis of Proteome in Non-functional Pituitary Adenomas: Clinical Relevance and Potential Benefits for the Patients
Source: Front Endocrinol (Lausanne). 2019 Dec 5;10:854. doi: 10.3389/fendo.2019.00854 (PMC6915109; doi:10.3389/fendo.2019.00854)
Supplement: Supplementary file 11 [file Table_11.xls]

## Sheet: Sheet 1
Supplemental Table 11. 27 DEGs were involved in the platelet activation pathway.
Protein name	ID number
AKT3	10000
ADCY5	111
AKT1	207
FCGR2A	2212
ARHGEF12	23365
GNAS	2778
ITGA2	3673
ITGA2B	2674
ITGB1	3688
ITGB3	3680
ITPR1	3708
ITPR2	3709
ITPR3	3710
PPP1CB	5500
FRXG1	5502
FRXG2	5593
MAPK11	5600
RAF1B	5508
MAPK12	6300
SRC	6714
STIM1	6788
SYK	6850
STK	695
TLN1	7004
TLN2	83660
FERMT3	83706
SNAP23	8773
