# Supplementary material for: Quantitative Analysis of Proteome in Non-functional Pituitary Adenomas: Clinical Relevance and Potential Benefits for the Patients
Source: Front Endocrinol (Lausanne). 2019 Dec 5;10:854. doi: 10.3389/fendo.2019.00854 (PMC6915109; doi:10.3389/fendo.2019.00854)
Supplement: Supplementary file 12 [file Table_12.xls]

## Sheet: 工作表1
Supplemental Table 12. Proteins (n = 2175) identified in human anterior pituitary gland [69], including 1933 proteins that were also identified in NFPAs, and 242 proteins that were not identified in NFPAs, compared to 6076 NFPA proteins in Supplemental Table 1. NFPA = nonfunctional pituitary adenoma. Yes means this protein is also identified in NFPAs. No means this protein is not identified in NF…
Accession	Gene Symbol	Protein	Localization	Biological process	Molecular function	# Unique Peptides	# PSMs	MW [Kda]	calc pI	Can it be identified in NFPA ?
4501853	ACAA1	3-ketoacyl-CoA thiolase, peroxisomal isoform a	Peroxisome	Metabolism	Acyltransferase activity	2	4	44.3	8.44	YES
4501859	ACADSB	short/branched chain specific acyl-CoA dehydrogenase, mitochondrial	Mitochondrion	Metabolism	Catalytic activity	3	8	47.5	6.99	YES
4501867	ACO2	aconitate hydratase, mitochondrial	Mitochondrion	Metabolism	Catalytic activity	26	88	85.4	7.61	YES
4501885	ACTB	actin, cytoplasmic 1	Cytoplasm	Cell growth and/or maintenance	Structural constituent of cytoskeleton	1	1101	41.7	5.48	YES
4501891	ACTN1	alpha-actinin-1 isoform b	Cytoplasm	Cell growth and/or maintenance	Cytoskeletal protein binding	20	166	103	5.41	YES
4501987	AFM	afamin	Extracellular	Cell growth and/or maintenance	Structural molecule activity	1	2	69	5.9	YES
4502013	AK2	adenylate kinase 2, mitochondrial isoform a	Mitochondrion	Metabolism	Catalytic activity	8	25	26.5	7.81	YES
4502027	ALB	serum albumin preproprotein	Extracellular	Transport	Transporter activity	72	3146	69.3	6.28	YES
4502049	AKR1B1	aldose reductase	Cytoplasm	Metabolism	Oxidoreductase activity	10	48	35.8	6.98	YES
4502057	ALOX5	arachidonate 5-lipoxygenase isoform 1	Cytoplasm	Metabolism	Lipase activity	1	2	77.9	5.77	YES
4502067	AMBP	protein AMBP preproprotein	Extracellular	Immune response	Defense/immunity protein activity	1	2	39	6.25	YES
4502101	ANXA1	annexin A1	Cytoplasm	Cell communication	Calcium ion binding	19	129	38.7	7.02	YES
4502107	ANXA5	annexin A5	Extracellular	Cell communication	Calcium ion binding	19	149	35.9	5.05	YES
4502133	APCS	serum amyloid P-component	Extracellular	Protein metabolism	Binding	5	22	25.4	6.54	YES
4502149	APOA2	apolipoprotein A-II preproprotein	Extracellular	Transport	Transporter activity	2	6	11.2	6.62	YES
4502171	APRT	adenine phosphoribosyltransferase isoform a	-	Purine salvage	Transferase activity	4	7	19.6	6.02	YES
4502205	ARF4	ADP-ribosylation factor 4	Plasma membrane	Transport	Transporter activity	1	18	20.5	7.14	YES
4502271	ATP1A2	sodium/potassium-transporting ATPase subunit alpha-2	Plasma membrane	Transport	ATPase activity	12	185	112.2	5.66	YES
4502277	ATP1B1	sodium/potassium-transporting ATPase subunit beta-1	Plasma membrane	Transport	ATPase activity	14	161	35	8.53	YES
4502281	ATP1B3	sodium/potassium-transporting ATPase subunit beta-3	Plasma membrane	Transport	ATPase activity	1	4	31.5	8.35	YES
4502303	ATP5O	ATP synthase subunit O, mitochondrial	Mitochondrion	Metabolism	Transporter activity	13	44	23.3	9.96	YES
4502315	ATP6V1C1	V-type proton ATPase subunit C 1	-	Transport	ATPase activity	13	36	43.9	7.46	YES
4502317	ATP6V1E1	V-type proton ATPase subunit E 1 isoform a	Plasma membrane	Transport	ATPase activity	4	12	26.1	8	YES
4502327	AUH	methylglutaconyl-CoA hydratase, mitochondrial isoform 1	Mitochondrion	Regulation of nucleobase, nucleoside, nucleotide and nucleic acid metabolism	RNA binding	2	8	35.6	9.48	YES
4502337	AZGP1	zinc-alpha-2-glycoprotein	Extracellular	Immune response	Cell adhesion molecule activity	1	2	34.2	6.05	YES
4502389	BANF1	barrier-to-autointegration factor	Nucleus	Biological_process unknown	DNA binding	2	4	10.1	6.09	YES
4502403	BGN	biglycan preproprotein	Extracellular	Cell growth and/or maintenance	Extracellular matrix structural constituent	13	228	41.6	7.52	YES
4502419	BLVRB	flavin reductase (NADPH)	Cytoplasm	Metabolism	Oxidoreductase activity	4	12	22.1	7.65	YES
4502491	C1QBP	complement component 1 Q subcomponent-binding protein, mitochondrial	Mitochondrion	Immune response	Complement receptor activity	3	10	31.3	4.84	YES
4502511	C9	complement component C9	Extracellular	Immune response	Complement activity	2	4	63.1	5.59	YES
4502599	CBR1	carbonyl reductase [NADPH] 1 isoform 1	Cytoplasm	Metabolism	Oxidoreductase activity	9	38	30.4	8.32	YES
4502643	CCT6A	T-complex protein 1 subunit zeta isoform a	Cytoplasm	Protein metabolism	Chaperone activity	16	65	58	6.68	YES
4502673	CD47	leukocyte surface antigen CD47 isoform 1	Plasma membrane	Immune response	Molecular function unknown	3	8	35.2	7.21	YES
4502693	CD9	CD9 antigen	Plasma membrane	Immune response	Molecular function unknown	2	8	25.4	7.15	YES
4502805	CHGA	chromogranin-A isoform 1 preproprotein	Endoplasmic reticulum	Cell communication	Defense/immunity protein activity	15	73	50.7	4.6	YES
4502891	CLNS1A	methylosome subunit pICln isoform a	Plasma membrane	Transport	Transporter activity	1	2	26.2	4.11	YES
4502901	CLTB	clathrin light chain B isoform a	Cytoplasm	Cell growth and/or maintenance	Structural molecule activity	4	8	23.2	4.69	YES
4502923	CNN3	calponin-3 isoform 1	Cytoplasm	Cell growth and/or maintenance	Cytoskeletal protein binding	1	3	36.4	6.05	YES
4502985	COX6B1	cytochrome c oxidase subunit 6B1	Mitochondrion	Metabolism	Oxidoreductase activity	3	18	10.2	7.05	YES
4503009	CPE	carboxypeptidase E preproprotein	Plasma membrane	Protein metabolism	Carboxypeptidase activity	25	320	53.1	5.14	YES
4503023	CPT2	carnitine O-palmitoyltransferase 2, mitochondrial	Mitochondrion	Metabolism	Palmitoyltransferase activity	8	24	73.7	8.18	YES
4503065	CRYM	ketimine reductase mu-crystallin	Cytoplasm	Osmoregulation	Hormone binding	16	160	33.8	5.14	YES
4503107	CST3	cystatin-C	Extracellular	Protein metabolism	Protease inhibitor activity	3	10	15.8	8.75	YES
4503117	CSTB	cystatin-B	Nucleus	Protein metabolism	Protease inhibitor activity	3	10	11.1	7.56	YES
4503143	CTSD	cathepsin D preproprotein	Lysosome	Protein metabolism	Aspartic-type signal peptidase activity	11	50	44.5	6.54	YES
4503301	DECR1	2,4-dienoyl-CoA reductase, mitochondrial	Mitochondrion	Metabolism	Catalytic activity	7	30	36	9.28	YES
4503475	EEF1A2	elongation factor 1-alpha 2	Cytoplasm	Protein metabolism	Translation regulator activity	8	326	50.4	9.03	YES
4503477	EEF1B2	elongation factor 1-beta	Cytoplasm	Protein metabolism	Translation regulator activity	4	12	24.7	4.67	YES
4503481	EEF1G	elongation factor 1-gamma	Nucleolus	Protein metabolism	Translation regulator activity	9	40	50.1	6.67	YES
4503483	EEF2	elongation factor 2	Cytoplasm	Protein metabolism	Translation regulator activity	21	90	95.3	6.83	YES
4503487	EFNA5	ephrin-A5	Plasma membrane	Cell communication	Receptor binding	1	2	26.3	6.42	YES
4503507	EIF2S3	eukaryotic translation initiation factor 2 subunit 3	Cytoplasm	Protein metabolism	Translation regulator activity	5	12	51.1	8.4	YES
4503509	EIF3A	eukaryotic translation initiation factor 3 subunit A	Cytoplasm	Protein metabolism	Translation regulator activity	6	14	166.5	6.79	YES
4503513	EIF3I	eukaryotic translation initiation factor 3 subunit I	Ribosome	Protein metabolism	Translation regulator activity	2	6	36.5	5.64	YES
4503515	EIF3H	eukaryotic translation initiation factor 3 subunit H	Ribosome	Protein metabolism	Translation regulator activity	1	2	39.9	6.54	YES
4503519	EIF3F	eukaryotic translation initiation factor 3 subunit F	Cytoplasm	Protein metabolism	Translation regulator activity	1	2	37.5	5.45	YES
4503523	EIF3D	eukaryotic translation initiation factor 3 subunit D	Cytoplasm	Protein metabolism	Translation regulator activity	1	2	63.9	6.05	YES
4503571	ENO1	alpha-enolase isoform 1	Cytoplasm	Metabolism	Catalytic activity	33	727	47.1	7.39	YES
4503607	ETFA	electron transfer flavoprotein subunit alpha, mitochondrial isoform a	Mitochondrion	Metabolism	Auxiliary transport protein activity	8	34	35.1	8.38	YES
4503609	ETFB	electron transfer flavoprotein subunit beta isoform 1	Mitochondrion	Metabolism	Oxidoreductase activity	13	44	27.8	8.1	YES
4503635	F2	prothrombin isoform 1 preproprotein	Extracellular	Protein metabolism	Peptidase activity	2	4	70	5.9	YES
4503641	F3	tissue factor isoform 1	Plasma membrane	Protein metabolism	Cofactor binding	1	2	33	7.03	YES
4503649	F9	coagulation factor IX isoform 1 preproprotein	Extracellular	Protein metabolism	Extracellular matrix binding	1	2	51.7	5.47	YES
4503685	FDPS	farnesyl pyrophosphate synthase isoform a	Peroxisome	Metabolism	Transferase activity	1	2	48.2	6.15	YES
4503689	FGA	fibrinogen alpha chain isoform alpha-E preproprotein	Extracellular	Protein metabolism	Protein binding	7	16	94.9	6.01	YES
4503729	FKBP4	peptidyl-prolyl cis-trans isomerase FKBP4	Cytoplasm	Metabolism	Isomerase activity	5	11	51.8	5.43	YES
4503765	FMR1	fragile X mental retardation protein 1 isoform ISO1	Cytoplasm	Regulation of nucleobase, nucleoside, nucleotide and nucleic acid metabolism	RNA binding	2	4	71.1	7.42	YES
4503771	FNTA	protein farnesyltransferase/geranylgeranyltransferase type-1 subunit alpha	Nucleus	Protein modification	Transferase activity	1	2	44.4	5.08	YES
4503841	XRCC6	X-ray repair cross-complementing protein 6 isoform 1	Nucleus	Regulation of nucleobase, nucleoside, nucleotide and nucleic acid metabolism	DNA binding	19	72	69.8	6.64	YES
4503895	GALK1	galactokinase	Cytoplasm	Metabolism	Catalytic activity	3	8	42.2	6.46	YES
4503937	GBAS	protein NipSnap homolog 2 isoform 1	Plasma membrane	Cell communication	Molecular function unknown	7	32	33.7	9.36	YES
4503943	GCDH	glutaryl-CoA dehydrogenase, mitochondrial isoform a	Mitochondrion	Metabolism	Catalytic activity	2	6	48.1	8.06	YES
4503971	GDI1	rab GDP dissociation inhibitor alpha	Cytoplasm	Cell communication	GTPase activator activity	16	145	50.6	5.14	YES
4503987	GGH	gamma-glutamyl hydrolase	Lysosome	Metabolism	Hydrolase activity	1	2	35.9	7.11	YES
4504031	GMDS	GDP-mannose 4,6 dehydratase isoform 1	Cytoplasm	Metabolism	Hydro-lyase activity	1	2	41.9	7.31	YES
4504041	GNAI2	guanine nucleotide-binding protein G(i) subunit alpha-2 isoform 1	Plasma membrane	Cell communication	GTPase activity	8	105	40.4	5.54	YES
4504051	GNAZ	guanine nucleotide-binding protein G(z) subunit alpha	Golgi apparatus	Cell communication	GTPase activity	3	10	40.9	7.61	YES
4504061	GNS	N-acetylglucosamine-6-sulfatase	Lysosome	Metabolism	Catalytic activity	1	2	62	8.31	YES
4504067	GOT1	aspartate aminotransferase, cytoplasmic	Cytoplasm	Metabolism	Transaminase activity	22	120	46.2	7.01	YES
4504111	GRB2	growth factor receptor-bound protein 2 isoform 1	Cytoplasm	Signal transduction	Receptor signaling complex scaffold activity	5	14	25.2	6.32	YES
4504175	GSTM2	glutathione S-transferase Mu 2 isoform 1	Cytoplasm	Metabolism	Glutathione transferase activity	8	45	25.7	6.37	YES
4504255	H2AFZ	histone H2A.Z	Nucleus	Regulation of nucleobase, nucleoside, nucleotide and nucleic acid metabolism	DNA binding	1	23	13.5	10.58	YES
4504279	H3F3A	histone H3.3	Nucleus	Regulation of nucleobase, nucleoside, nucleotide and nucleic acid metabolism	DNA binding	2	46	15.3	11.27	YES
4504351	HBD	hemoglobin subunit delta	-	Transport	Transporter activity	9	589	16	8.05	YES
4504373	HEXB	beta-hexosaminidase subunit beta isoform 1 preproprotein	Lysosome	Metabolism	Hydrolase activity	3	10	63.1	6.76	YES
4504483	HPRT1	hypoxanthine-guanine phosphoribosyltransferase	Cytoplasm	Metabolism	Catalytic activity	12	44	24.6	6.68	YES
4504505	HSD17B4	peroxisomal multifunctional enzyme type 2 isoform 2	Peroxisome	Metabolism	Catalytic activity	12	34	79.6	8.84	YES
4504511	DNAJA1	dnaJ homolog subfamily A member 1 isoform 1	Nucleus	Protein metabolism	Heat shock protein activity	2	6	44.8	7.08	YES
4504517	HSPB1	heat shock protein beta-1	Cytoplasm	Protein metabolism	Chaperone activity	21	175	22.8	6.4	YES
4504523	HSPE1	10 kDa heat shock protein, mitochondrial	Mitochondrion	Protein metabolism	Heat shock protein activity	3	22	10.9	8.92	YES
4504763	ITGAV	integrin alpha-V isoform 1 preproprotein	Plasma membrane	Cell communication	Receptor activity	3	6	116	5.68	YES
4504771	EIF6	eukaryotic translation initiation factor 6 isoform a	Nucleolus	Regulation of translation	Translation regulator activity	3	10	26.6	4.68	YES
4504893	KNG1	kininogen-1 isoform 2	Extracellular	Protein metabolism	Protease inhibitor activity	3	8	47.9	6.65	YES
4504901	KPNA4	importin subunit alpha-3	Cytoplasm	Transport	Transporter activity	2	3	57.9	4.96	YES
4504981	LGALS1	galectin-1	Nucleus	Immune response	Receptor binding	6	50	14.7	5.5	YES
4505021	LRPAP1	alpha-2-macroglobulin receptor-associated protein	Endoplasmic reticulum	Protein metabolism	Chaperone activity	4	10	41.4	8.78	YES
4505029	LTA4H	leukotriene A-4 hydrolase isoform 1	Cytoplasm	Protein metabolism	Hydrolase activity	18	65	69.2	6.18	YES
4505047	LUM	lumican	Extracellular	Cell growth and/or maintenance	Extracellular matrix structural constituent	15	252	38.4	6.61	YES
4505143	ME1	NADP-dependent malic enzyme	Cytoplasm	Metabolism	Carboxy-lyase activity	5	10	64.1	6.13	YES
4505145	ME2	NAD-dependent malic enzyme, mitochondrial isoform 1	Mitochondrion	Metabolism	Carboxy-lyase activity	5	13	65.4	7.61	YES
4505235	MPI	mannose-6-phosphate isomerase isoform 1	Cytoplasm	Metabolism	Isomerase activity	4	8	46.6	5.95	YES
4505255	MSI1	RNA-binding protein Musashi homolog 1	Cytoplasm	Regulation of nucleobase, nucleoside, nucleotide and nucleic acid metabolism	RNA binding	1	2	39.1	7.85	YES
4505357	NDUFA4	cytochrome c oxidase subunit NDUFA4	Mitochondrion	Metabolism	Oxidoreductase activity	2	6	9.4	9.38	YES
4505369	NDUFS4	NADH dehydrogenase [ubiquinone] iron-sulfur protein 4, mitochondrial isoform 1	Mitochondrion	Metabolism	Catalytic activity	1	2	20.1	10.3	YES
4505467	NT5E	5'-nucleotidase isoform 1 preproprotein	Plasma membrane	Regulation of nucleobase, nucleoside, nucleotide and nucleic acid metabolism	Hydrolase activity	17	80	63.3	7.03	YES
4505529	ORM2	alpha-1-acid glycoprotein 2	Extracellular	Immune response	Defense/immunity protein activity	1	4	23.6	5.11	YES
4505531	OSBP	oxysterol-binding protein 1	Cytoplasm	Transport	Transporter activity	1	2	89.4	7.3	YES
4505571	SQSTM1	sequestosome-1 isoform 1	Cytoplasm	Protein metabolism	Ubiquitin-specific protease activity	2	4	47.7	5.22	YES
4505581	PRKRA	interferon-inducible double-stranded RNA-dependent protein kinase activator A isoform 1	Cytoplasm	Regulation of nucleobase, nucleoside, nucleotide and nucleic acid metabolism	RNA binding	2	6	34.4	8.41	YES
4505621	PEBP1	phosphatidylethanolamine-binding protein 1	Cytoplasm	Cell communication	Protease inhibitor activity	11	70	21	7.53	YES
4505657	PDE2A	cGMP-dependent 3',5'-cyclic phosphodiesterase isoform PDE2A3	Cytoplasm	Metabolism	Phosphoric diester hydrolase activity	2	4	105.6	5.41	YES
4505701	PDXK	pyridoxal kinase	Cytoplasm	Metabolism	Catalytic activity	10	48	35.1	6.13	YES
4505753	PGAM1	phosphoglycerate mutase 1 isoform 1	Cytoplasm	Metabolism	Catalytic activity	13	147	28.8	7.18	YES
4505763	PGK1	phosphoglycerate kinase 1	Cytoplasmic vesicle	Metabolism	Catalytic activity	34	326	44.6	8.1	YES
4505783	PHKB	phosphorylase b kinase regulatory subunit beta isoform a	-	Biological_process unknown	Molecular function unknown	1	2	124.8	6.95	YES
4505881	PLG	plasminogen isoform 1	Extracellular	Protein metabolism	Peptidase activity	2	8	90.5	7.24	YES
4505941	POLR2B	DNA-directed RNA polymerase II subunit RPB2 isoform 1	Nucleus	Regulation of nucleobase, nucleoside, nucleotide and nucleic acid metabolism	DNA-directed RNA polymerase activity	1	2	133.8	6.87	YES
4506005	PPP1CB	serine/threonine-protein phosphatase PP1-beta catalytic subunit isoform 1	Nucleolus	Cell growth and/or maintenance	Protein serine/threonine phosphatase activity	4	34	37.2	6.19	YES
4506013	PPP1R7	protein phosphatase 1 regulatory subunit 7 isoform 1	Nucleus	Regulation of nucleobase, nucleoside, nucleotide and nucleic acid metabolism	Protein serine/threonine phosphatase activity	4	14	41.5	4.91	YES
4506017	PPP2CA	serine/threonine-protein phosphatase 2A catalytic subunit alpha isoform	Cytoplasm	Cell communication	Protein serine/threonine phosphatase activity	7	20	35.6	5.54	YES
4506031	PPT1	palmitoyl-protein thioesterase 1 isoform 1	Lysosome	Metabolism	Hydrolase activity	4	12	34.2	6.52	YES
4506041	PRELP	prolargin	Extracellular matrix	Cell growth and/or maintenance	Cytoskeletal anchoring activity	16	170	43.8	9.38	YES
4506067	PRKCA	protein kinase C alpha type	Nucleus	Cell communication	Protein serine/threonine kinase activity	3	14	76.7	7.05	YES
4506127	PRPS1	ribose-phosphate pyrophosphokinase 1 isoform 1	-	Metabolism	Ligase activity	4	12	34.8	6.98	YES
4506141	HTRA1	serine protease HTRA1	Extracellular	Protein metabolism	Serine-type peptidase activity	5	20	51.3	7.83	YES
4506181	PSMA2	proteasome subunit alpha type-2	-	Protein metabolism	Ubiquitin-specific protease activity	5	25	25.9	7.43	YES
4506183	PSMA3	proteasome subunit alpha type-3 isoform 1	Cytoplasm	Protein metabolism	Ubiquitin-specific protease activity	5	20	28.4	5.33	YES
4506185	PSMA4	proteasome subunit alpha type-4 isoform 1	Cytoplasm	Protein metabolism	Ubiquitin-specific protease activity	8	30	29.5	7.72	YES
4506189	PSMA7	proteasome subunit alpha type-7	Cytoplasm	Protein metabolism	Ubiquitin-specific protease activity	13	65	27.9	8.46	YES
4506193	PSMB1	proteasome subunit beta type-1	-	Protein metabolism	Ubiquitin-specific protease activity	6	12	26.5	8.13	YES
4506195	PSMB2	proteasome subunit beta type-2 isoform 1	Cytoplasm	Protein metabolism	Ubiquitin-specific protease activity	2	4	22.8	7.02	YES
4506203	PSMB7	proteasome subunit beta type-7	Cytoplasm	Protein metabolism	Ubiquitin-specific protease activity	1	2	29.9	7.68	YES
4506209	PSMC2	26S protease regulatory subunit 7 isoform 1	Nucleus	Protein metabolism	Ubiquitin-specific protease activity	5	16	48.6	5.95	YES
4506221	PSMD12	26S proteasome non-ATPase regulatory subunit 12 isoform 1	Cytoplasm	Protein metabolism	Ubiquitin-specific protease activity	8	24	52.9	7.65	YES
4506339	PEX19	peroxisomal biogenesis factor 19 isoform a	Peroxisome	Cell communication	Protein binding	1	2	32.8	4.34	YES
4506365	RAB2A	ras-related protein Rab-2A isoform a	Golgi apparatus	Cell communication	GTPase activity	2	8	23.5	6.54	YES
4506367	RAB3A	ras-related protein Rab-3A	Golgi apparatus	Cell communication	GTPase activity	2	53	25	5.03	YES
4506387	RAD23B	UV excision repair protein RAD23 homolog B isoform 1	Nucleus	Regulation of nucleobase, nucleoside, nucleotide and nucleic acid metabolism	DNA binding	1	6	43.1	4.84	YES
4506455	RCN1	reticulocalbin-1	Endoplasmic reticulum	Cell communication	Calcium ion binding	7	22	38.9	5	YES
4506583	RPA1	replication protein A 70 kDa DNA-binding subunit	Nucleus	Regulation of nucleobase, nucleoside, nucleotide and nucleic acid metabolism	DNA binding	2	4	68.1	7.21	YES
4506607	RPL18	60S ribosomal protein L18 isoform 1	Ribosome	Protein metabolism	Structural constituent of ribosome	1	2	21.6	11.72	YES
4506613	RPL22	60S ribosomal protein L22	Ribosome	Protein metabolism	Structural constituent of ribosome	1	2	14.8	9.19	YES
4506669	RPLP1	60S acidic ribosomal protein P1 isoform 1	Ribosome	Protein metabolism	Structural constituent of ribosome	1	6	11.5	4.32	YES
4506671	RPLP2	60S acidic ribosomal protein P2	Cytoplasm	Protein metabolism	Structural constituent of ribosome	3	14	11.7	4.54	YES
4506675	RPN1	dolichyl-diphosphooligosaccharide--protein glycosyltransferase subunit 1	Endoplasmic reticulum	Protein metabolism	Ubiquitin-specific protease activity	11	44	68.5	6.38	YES
4506699	RPS21	40S ribosomal protein S21	Ribosome	Protein metabolism	Structural constituent of ribosome	2	10	9.1	8.5	YES
4506715	RPS28	40S ribosomal protein S28	Ribosome	Protein metabolism	Structural constituent of ribosome	1	2	7.8	10.7	YES
4506725	RPS4X	40S ribosomal protein S4, X isoform X isoform	Ribosome	Protein metabolism	Structural constituent of ribosome	5	12	29.6	10.15	YES
4506741	RPS7	40S ribosomal protein S7	Ribosome	Protein metabolism	Structural constituent of ribosome	2	4	22.1	10.1	YES
4506753	RUVBL1	ruvB-like 1 isoform 1	Nucleus	Regulation of nucleobase, nucleoside, nucleotide and nucleic acid metabolism	DNA binding	9	28	50.2	6.42	YES
4506787	IQGAP1	ras GTPase-activating-like protein IQGAP1	Cytoplasm	Cytoskeleton organization and biogenesis	GTPase activator activity	12	41	189.1	6.48	YES
4506901	SRSF3	serine/arginine-rich splicing factor 3	Nucleus	Regulation of nucleobase, nucleoside, nucleotide and nucleic acid metabolism	RNA binding	1	6	19.3	11.65	YES
4506925	SH3BGRL	SH3 domain-binding glutamic acid-rich-like protein	-	Cell communication	Molecular function unknown	3	5	12.8	5.25	YES
4507021	SLC4A1	band 3 anion transport protein	Plasma membrane	Transport	Auxiliary transport protein activity	9	36	101.7	5.19	YES
4507115	FSCN1	fascin	Plasma membrane	Cell growth and/or maintenance	Structural molecule activity	8	26	54.5	7.24	YES
4507127	SNRPC	U1 small nuclear ribonucleoprotein C	Nucleus	Regulation of nucleobase, nucleoside, nucleotide and nucleic acid metabolism	RNA binding	1	2	17.4	9.67	YES
4507149	SOD1	superoxide dismutase [Cu-Zn]	Peroxisome	Metabolism	Superoxide dismutase activity	6	43	15.9	6.13	YES
4507185	SPR	sepiapterin reductase	-	Metabolism	Catalytic activity	4	26	28	8.05	YES
4507207	SRI	sorcin isoform A	Cytoplasm	Cell communication	Calcium ion binding	3	8	21.7	5.59	YES
4507217	SRP9	signal recognition particle 9 kDa protein isoform 2	Cytoplasm	Protein metabolism	RNA binding	1	2	10.1	7.97	YES
4507297	STXBP1	syntaxin-binding protein 1 isoform a	Cytoplasm	Neurotransmitter transport	Transporter activity	32	184	68.7	6.77	YES
4507319	SURF1	surfeit locus protein 1 isoform 1	Mitochondrion	Metabolism	Transporter activity	1	2	33.3	9.6	YES
4507467	TGFBI	transforming growth factor-beta-induced protein ig-h3	Extracellular	Cell communication	Receptor binding	7	18	74.6	7.71	YES
4507491	THOP1	thimet oligopeptidase	Cytoplasm	Protein metabolism	Metallopeptidase activity	4	8	78.8	6.05	YES
4507509	TIMP1	metalloproteinase inhibitor 1	Extracellular	Cell growth and/or maintenance	Extracellular matrix structural constituent	3	8	23.2	8.1	YES
4507511	TIMP2	metalloproteinase inhibitor 2	Extracellular	Cell growth and/or maintenance	Extracellular matrix structural constituent	4	12	24.4	7.49	YES
4507555	TMPO	thymopoietin isoform alpha	Mitochondrion	Nuclear organization and biogenesis	Molecular function unknown	1	2	75.4	7.66	YES
4507677	HSP90B1	endoplasmin	Endoplasmic reticulum	Protein metabolism	Heat shock protein activity	34	147	92.4	4.84	YES
4507725	TTR	transthyretin	Extracellular	Transport	Transporter activity	2	12	15.9	5.76	YES
4507729	TUBB2A	tubulin beta-2A chain isoform 1	Cytoplasm	Cell growth and/or maintenance	Structural constituent of cytoskeleton	3	2265	49.9	4.89	YES
4507793	UBE2N	ubiquitin-conjugating enzyme E2 N	Nucleus	Protein metabolism	Ubiquitin-specific protease activity	2	4	17.1	6.57	YES
4507835	UMPS	uridine 5'-monophosphate synthase	Nucleus	Metabolism	Transferase activity	1	2	52.2	7.24	YES
4507943	XPO1	exportin-1	Nucleus	Cell communication	Transporter activity	12	35	123.3	6.06	YES
4507947	YARS	tyrosine--tRNA ligase, cytoplasmic	Extracellular	Metabolism	Ligase activity	5	9	59.1	7.05	YES
4507951	YWHAH	14-3-3 protein eta	Cytoplasm	Cell communication	Receptor signaling complex scaffold activity	12	95	28.2	4.84	YES
4557014	CAT	catalase	Cytoplasm	Metabolism	Oxidoreductase activity	13	35	59.7	7.39	YES
4557233	ACADS	short-chain specific acyl-CoA dehydrogenase, mitochondrial isoform 1	Mitochondrion	Metabolism	Oxidoreductase activity	1	2	44.3	7.99	YES
4557237	ACAT1	acetyl-CoA acetyltransferase, mitochondrial	Mitochondrion	Metabolism	Acyltransferase activity	24	115	45.2	8.85	YES
4557305	ALDOA	fructose-bisphosphate aldolase A isoform 1	Cytoplasm	Metabolism	Lyase activity	23	263	39.4	8.09	YES
4557353	BCKDHB	2-oxoisovalerate dehydrogenase subunit beta, mitochondrial isoform 1	Mitochondrion	Metabolism	Catalytic activity	1	2	43.1	6.29	YES
4557395	CA2	carbonic anhydrase 2 isoform 1	Cytoplasm	Metabolism	Catalytic activity	12	60	29.2	7.4	YES
4557581	FABP5	fatty acid-binding protein, epidermal	Cytoplasm	Transport	Transporter activity	2	4	15.2	7.01	YES
4557587	FAH	fumarylacetoacetase	Cytoplasm	Metabolism	Hydrolase activity	5	15	46.3	6.95	YES
4557625	GCLC	glutamate--cysteine ligase catalytic subunit isoform a	-	Metabolism	Ligase activity	2	4	72.7	6.09	YES
4557707	L1CAM	neural cell adhesion molecule L1 isoform 1	Plasma membrane	Biological_process unknown	Cell adhesion molecule activity	16	102	139.9	6.24	YES
4557735	MAOA	amine oxidase [flavin-containing] A isoform 1	Mitochondrion	Metabolism	Catalytic activity	1	12	59.6	7.85	YES
4557759	MPO	myeloperoxidase	Extracellular	Metabolism	Oxidoreductase activity	2	4	83.8	8.97	YES
4557809	OAT	ornithine aminotransferase, mitochondrial isoform 1	Mitochondrion	Metabolism	Transaminase activity	6	15	48.5	7.03	YES
4557817	OXCT1	succinyl-CoA:3-ketoacid coenzyme A transferase 1, mitochondrial	Mitochondrion	Metabolism	CoA-transferase activity	8	26	56.1	7.46	YES
4557871	TF	serotransferrin	Endosome	Transport	Transporter activity	2	248	77	7.12	YES
4757714	ACP1	low molecular weight phosphotyrosine protein phosphatase isoform c	Cytoplasm	Metabolism	Acid phosphatase activity	1	2	18	6.74	YES
4757732	AIFM1	apoptosis-inducing factor 1, mitochondrial isoform AIF	Mitochondrion	Cell communication	Oxidoreductase activity	11	26	66.9	8.95	YES
4757764	RHOB	rho-related GTP-binding protein RhoB	Plasma membrane	Cell communication	GTPase activity	1	10	22.1	5.24	YES
4757804	ATOX1	copper transport protein ATOX1	Cytoplasm	Protein metabolism	Chaperone activity	1	2	7.4	7.24	YES
4757834	BAG2	BAG family molecular chaperone regulator 2	Nucleus	Apoptosis	Receptor signaling complex scaffold activity	1	2	23.8	6.7	YES
4757900	CALR	calreticulin	Endoplasmic reticulum	Protein metabolism	Chaperone activity	14	85	48.1	4.44	YES
4757902	CETN2	centrin-2	Centrosome	Cell communication	Calcium ion binding	3	10	19.7	5	YES
4757944	CD81	CD81 antigen isoform 1	Plasma membrane	Metabolism	Catalytic activity	1	8	25.8	5.29	YES
4757952	CDC42	cell division control protein 42 homolog isoform 1	Cell junction	Cell communication	GTPase activity	3	12	21.2	6.55	YES
4758032	COPB2	coatomer subunit beta'	Cytoplasm	Transport	Transporter activity	6	14	102.4	5.27	YES
4758052	CRABP1	cellular retinoic acid-binding protein 1	Cytoplasm	Transport	Transporter activity	1	2	15.6	5.38	YES
4758086	CSRP1	cysteine and glycine-rich protein 1 isoform 1	Nucleus	Cell communication	Receptor signaling complex scaffold activity	4	10	20.6	8.57	YES
4758256	EIF2S1	eukaryotic translation initiation factor 2 subunit 1	Cytoplasm	Protein metabolism	Translation regulator activity	1	2	36.1	5.08	YES
4758302	ERH	enhancer of rudimentary homolog	Nucleus	Regulation of nucleobase, nucleoside, nucleotide and nucleic acid metabolism	Transcription regulator activity	2	3	12.3	5.92	YES
4758304	PDIA4	protein disulfide-isomerase A4	Endoplasmic reticulum	Protein metabolism	Chaperone activity	18	64	72.9	5.07	YES
4758340	FARSA	phenylalanine--tRNA ligase alpha subunit	Cytoplasm	Protein metabolism	Ligase activity	2	3	57.5	7.8	YES
4758384	FKBP5	peptidyl-prolyl cis-trans isomerase FKBP5 isoform 1	Cytoplasm	Metabolism	Isomerase activity	1	2	51.2	5.9	YES
4758442	GMFB	glia maturation factor beta	Cytoplasm	Cell differentiation	Growth factor activity	1	2	16.7	5.29	YES
4758484	GSTO1	glutathione S-transferase omega-1 isoform 1	Nucleus	Metabolism	Glutathione transferase activity	8	30	27.5	6.6	YES
4758504	HSD17B10	3-hydroxyacyl-CoA dehydrogenase type-2 isoform 1	Mitochondrion	Metabolism	Catalytic activity	13	72	26.9	7.78	YES
4758582	IDH3G	isocitrate dehydrogenase [NAD] subunit gamma, mitochondrial isoform a	Mitochondrion	Metabolism	Catalytic activity	6	18	42.8	8.5	YES
4758638	PRDX6	peroxiredoxin-6	Cytoplasm	Metabolism	Peroxidase activity	28	187	25	6.38	YES
4758648	KIF5B	kinesin-1 heavy chain	Mitochondrion	Cell growth and/or maintenance	Motor activity	16	47	109.6	6.51	YES
4758650	KIF5C	kinesin heavy chain isoform 5C	-	Cell growth and/or maintenance	Motor activity	8	32	109.4	6.19	YES
4758714	MGST3	microsomal glutathione S-transferase 3	Endoplasmic reticulum	Metabolism	Glutathione transferase activity	5	16	16.5	9.38	YES
4758762	NARS	asparagine--tRNA ligase, cytoplasmic	Cytoplasm	Protein metabolism	Ligase activity	3	6	62.9	6.25	YES
4758768	NDUFA10	NADH dehydrogenase [ubiquinone] 1 alpha subcomplex subunit 10, mitochondrial isoform 1	Mitochondrion	Metabolism	Oxidoreductase activity	4	22	40.7	8.48	YES
4758774	NDUFB10	NADH dehydrogenase [ubiquinone] 1 beta subcomplex subunit 10	Mitochondrion	Metabolism	Oxidoreductase activity	1	3	20.8	8.48	YES
4758788	NDUFS3	NADH dehydrogenase [ubiquinone] iron-sulfur protein 3, mitochondrial	Mitochondrion	Metabolism	Catalytic activity	13	62	30.2	7.5	YES
4758792	NDUFS6	NADH dehydrogenase [ubiquinone] iron-sulfur protein 6, mitochondrial	Mitochondrion	Metabolism	Catalytic activity	1	2	13.7	8.28	YES
4758906	SERPINB9	serpin B9	Cytoplasm	Protein metabolism	Protease inhibitor activity	1	4	42.4	5.86	YES
4758950	PPIB	peptidyl-prolyl cis-trans isomerase B	Endoplasmic reticulum	Protein metabolism	Chaperone activity	5	16	23.7	9.41	YES
4758988	RAB1A	ras-related protein Rab-1A isoform 1	Endoplasmic reticulum	Cell communication	GTPase activity	3	33	22.7	6.21	YES
4759034	ETF1	eukaryotic peptide chain release factor subunit 1 isoform 1	Ribosome	Protein metabolism	Translation regulator activity	2	8	49	5.71	YES
4759068	SCO1	protein SCO1 homolog, mitochondrial	Mitochondrion	Metabolism	Molecular function unknown	1	4	33.8	8.88	YES
4759082	SDPR	serum deprivation-response protein	Cytoplasm	Cell growth and/or maintenance	Serine-type peptidase activity	2	4	47.1	5.21	YES
4759098	TRA2B	transformer-2 protein homolog beta isoform 1	Nucleus	Regulation of nucleobase, nucleoside, nucleotide and nucleic acid metabolism	RNA binding	1	2	33.6	11.25	YES
4759156	SNRPA	U1 small nuclear ribonucleoprotein A	Nucleus	Regulation of nucleobase, nucleoside, nucleotide and nucleic acid metabolism	RNA binding	1	3	31.3	9.83	YES
4759160	SNRPD3	small nuclear ribonucleoprotein Sm D3	Nucleus	Regulation of nucleobase, nucleoside, nucleotide and nucleic acid metabolism	RNA binding	2	6	13.9	10.32	YES
4759270	TSN	translin isoform 1	Nucleus	Regulation of nucleobase, nucleoside, nucleotide and nucleic acid metabolism	DNA binding	7	35	26.2	6.44	YES
4759302	VAPB	vesicle-associated membrane protein-associated protein B/C isoform 1	Plasma membrane	Transport	Auxiliary transport protein activity	1	2	27.2	7.3	YES
4759344	ZW10	centromere/kinetochore protein zw10 homolog	Kinetochore	Cell communication	DNA binding	1	1	88.8	6.27	YES
4809279	ANXA7	annexin A7 isoform 2	Nucleus	Transport	Calcium ion binding	7	24	52.7	5.68	YES
4826643	ANXA3	annexin A3	Cytoplasm	Cell communication	Calcium ion binding	2	6	36.4	5.92	YES
4826655	CALB1	calbindin	Nucleus	Cell communication	Calcium ion binding	5	22	30	4.83	YES
4826675	CDK5	cyclin-dependent-like kinase 5 isoform 1	Cytoplasm	Cell communication	Protein serine/threonine kinase activity	1	4	33.3	7.66	YES
4826686	DDX1	ATP-dependent RNA helicase DDX1	Nucleus	Regulation of nucleobase, nucleoside, nucleotide and nucleic acid metabolism	RNA binding	11	42	82.4	7.23	YES
4826734	FUS	RNA-binding protein FUS isoform 1	Nucleus	RNA localization	Nucleocytoplasmic transporter activity	2	8	53.4	9.36	YES
4826762	HP	haptoglobin isoform 1 preproprotein	Extracellular	Immune response	Transporter activity	2	7	45.2	6.58	YES
4826898	PFN1	profilin-1	Cytoplasm	Cell growth and/or maintenance	Cytoskeletal protein binding	7	36	15	8.27	YES
4826908	PIK3R2	phosphatidylinositol 3-kinase regulatory subunit beta	Plasma membrane	Cell communication	Kinase regulator activity	1	2	81.6	6.52	YES
4826952	PSMD5	26S proteasome non-ATPase regulatory subunit 5 isoform 1	Cytoplasm	Protein metabolism	Ubiquitin-specific protease activity	6	12	56.2	5.48	YES
4826964	RAD23A	UV excision repair protein RAD23 homolog A isoform 1	Nucleus	DNA repair	DNA binding	2	5	39.6	4.58	YES
4826972	RBM8A	RNA-binding protein 8A	Nucleus	Regulation of nucleobase, nucleoside, nucleotide and nucleic acid metabolism	RNA binding	1	1	19.9	5.72	YES
4827050	USP14	ubiquitin carboxyl-terminal hydrolase 14 isoform a	Cytosol	Protein metabolism	Ubiquitin-specific protease activity	7	23	56	5.3	YES
4885049	ACTC1	actin, alpha cardiac muscle 1	Cytoplasm	Cell growth and/or maintenance	Structural constituent of cytoskeleton	1	616	42	5.39	YES
4885153	CRKL	crk-like protein	Cytoplasm	Cell communication	Receptor signaling complex scaffold activity	2	6	33.8	6.74	YES
4885281	GLUD1	glutamate dehydrogenase 1, mitochondrial isoform a	Mitochondrion	Metabolism	Catalytic activity	28	177	61.4	7.8	YES
4885379	HIST1H1E	histone H1.4	Nucleus	Regulation of nucleobase, nucleoside, nucleotide and nucleic acid metabolism	DNA binding	3	7	21.9	11.03	YES
4885399	SMC3	structural maintenance of chromosomes protein 3	Nucleus	Biological_process unknown	Molecular function unknown	2	4	141.5	7.18	YES
4885413	HINT1	histidine triad nucleotide-binding protein 1	Cytoplasm	Cell communication	ATPase activity	1	2	13.8	6.95	YES
4885417	UBE2K	ubiquitin-conjugating enzyme E2 K isoform 1	Cytoplasm	Protein metabolism	Ubiquitin-specific protease activity	1	2	22.4	5.44	YES
4885661	YES1	tyrosine-protein kinase Yes	Cytoplasm	Cell communication	Protein-tyrosine kinase activity	1	6	60.8	6.74	YES
5031569	ACTR1A	alpha-centractin	Cytoplasm	Cell growth and/or maintenance	Structural constituent of cytoskeleton	5	21	42.6	6.64	YES
5031571	ACTR2	actin-related protein 2 isoform b	Cytoplasm	Cell motility	Structural constituent of cytoskeleton	8	36	44.7	6.74	YES
5031573	ACTR3	actin-related protein 3 isoform 1	Cytoplasm	Cell growth and/or maintenance	Structural constituent of cytoskeleton	15	64	47.3	5.88	YES
5031599	ARPC2	actin-related protein 2/3 complex subunit 2	Actin cytoskeleton	Cytoskeleton organization and biogenesis	Cytoskeletal protein binding	6	30	34.3	7.36	YES
5031631	SCARB2	lysosome membrane protein 2 isoform 1	Plasma membrane	Cell communication	Receptor activity	4	8	54.3	5.14	YES
5031635	CFL1	cofilin-1	Cytoplasm	Cell growth and/or maintenance	Cytoskeletal protein binding	7	58	18.5	8.09	YES
5031653	BCAS2	pre-mRNA-splicing factor SPF27	Nucleus	Regulation of nucleobase, nucleoside, nucleotide and nucleic acid metabolism	Pre-mRNA splicing factor activity	1	2	26.1	5.66	YES
5031741	DNAJA2	dnaJ homolog subfamily A member 2	Cytoplasm	Protein metabolism	Chaperone activity	12	38	45.7	6.48	YES
5031755	HNRNPR	heterogeneous nuclear ribonucleoprotein R isoform 2	Nucleus	Regulation of nucleobase, nucleoside, nucleotide and nucleic acid metabolism	RNA binding	6	28	70.9	8.13	YES
5031777	IDH3A	isocitrate dehydrogenase [NAD] subunit alpha, mitochondrial	Mitochondrion	Metabolism	Catalytic activity	10	48	39.6	6.92	YES
5031857	LDHA	L-lactate dehydrogenase A chain isoform 1	Cytoplasm	Metabolism	Catalytic activity	15	146	36.7	8.27	YES
5031863	LGALS3BP	galectin-3-binding protein	Extracellular	Immune response	Extracellular matrix structural constituent	13	121	65.3	5.27	YES
5031873	LMAN1	protein ERGIC-53	Endoplasmic reticulum	Protein metabolism	Chaperone activity	1	2	57.5	6.77	YES
5031877	LMNB1	lamin-B1 isoform 1	Nucleus	Cell growth and/or maintenance	Structural molecule activity	7	34	66.4	5.16	YES
5031923	MRE11A	double-strand break repair protein MRE11A isoform 1	Nucleus	DNA repair	Exonuclease activity	1	2	80.5	5.9	YES
5031977	NAMPT	nicotinamide phosphoribosyltransferase	Extracellular	Anti-apoptosis	Transferase activity	2	4	55.5	7.15	YES
5031981	PSMD14	26S proteasome non-ATPase regulatory subunit 14	Cytoplasm	Protein metabolism	Ubiquitin-specific protease activity	2	4	34.6	6.52	YES
5031985	NUTF2	nuclear transport factor 2	Cytoplasm	Transport	Transporter activity	1	2	14.5	5.38	YES
5032007	PURA	transcriptional activator protein Pur-alpha	Nucleus	Regulation of nucleobase, nucleoside, nucleotide and nucleic acid metabolism	Transcription factor activity	8	44	34.9	6.44	YES
5032009	PYGM	glycogen phosphorylase, muscle form isoform 1	Endoplasmic reticulum	Metabolism	Phosphorylase activity	3	12	97	7.03	YES
5032027	RBBP4	histone-binding protein RBBP4 isoform a	Nucleus	Regulation of nucleobase, nucleoside, nucleotide and nucleic acid metabolism	Transcription regulator activity	2	5	47.6	4.89	YES
5032057	S100A11	protein S100-A11	Nucleus	Cell communication	Calcium ion binding	1	2	11.7	7.12	YES
5032087	SF3A1	splicing factor 3A subunit 1	Nucleus	Regulation of nucleobase, nucleoside, nucleotide and nucleic acid metabolism	RNA binding	2	4	88.8	5.22	YES
5032133	EIF1	eukaryotic translation initiation factor 1	Cytoplasm	Protein metabolism	Translation regulator activity	1	4	12.7	7.44	YES
5032179	TRIM28	transcription intermediary factor 1-beta	Nucleus	Regulation of nucleobase, nucleoside, nucleotide and nucleic acid metabolism	Transcription regulator activity	10	36	88.5	5.77	YES
5174391	AKR1A1	alcohol dehydrogenase [NADP(+)]	Cytoplasm	Metabolism	Oxidoreductase activity	8	30	36.6	6.79	YES
5174529	MAT2A	S-adenosylmethionine synthase isoform type-2	Cytoplasm	Metabolism	Catalytic activity	5	20	43.6	6.48	YES
5174613	NAP1L4	nucleosome assembly protein 1-like 4	Nucleus	Regulation of nucleobase, nucleoside, nucleotide and nucleic acid metabolism	Chaperone activity	4	14	42.8	4.69	YES
5174655	RTN3	reticulon-3 isoform a	Endoplasmic reticulum	Biological_process unknown	Molecular function unknown	3	15	25.6	8.51	YES
5174731	TSNAX	translin-associated protein X	Cytoplasm	Regulation of nucleobase, nucleoside, nucleotide and nucleic acid metabolism	Transporter activity	2	4	33.1	6.55	YES
5174735	TUBB4B	tubulin beta-4B chain	Cytoplasm	Cell growth and/or maintenance	Structural molecule activity	2	2418	49.8	4.89	YES
5292161	PSMD4	26S proteasome non-ATPase regulatory subunit 4	Cytoplasm	Protein metabolism	Ubiquitin-specific protease activity	2	4	40.7	4.79	YES
5453539	PAICS	multifunctional protein ADE2 isoform 2	Nucleus	Metabolism	Ligase activity	7	22	47	7.23	YES
5453543	AKR1C1	aldo-keto reductase family 1 member C1	Cytoplasm	Metabolism	Catalytic activity	3	18	36.8	7.88	YES
5453549	PRDX4	peroxiredoxin-4	Cytoplasm	Metabolism	Peroxidase activity	7	32	30.5	6.29	YES
5453559	ATP5H	ATP synthase subunit d, mitochondrial isoform a	Mitochondrial membrane	Energy pathways	Transporter activity	5	10	18.5	5.3	YES
5453593	CAP2	adenylyl cyclase-associated protein 2	-	Cell communication	Molecular function unknown	2	6	52.8	6.37	YES
5453599	CAPZA2	F-actin-capping protein subunit alpha-2	Cytoskeleton	Cell growth and/or maintenance	Structural constituent of cytoskeleton	2	12	32.9	5.85	YES
5453603	CCT2	T-complex protein 1 subunit beta isoform 1	Cytoplasm	Protein metabolism	Chaperone activity	18	73	57.5	6.46	YES
5453607	CCT7	T-complex protein 1 subunit eta isoform a	Cytoplasm	Protein folding	Chaperone activity	10	32	59.3	7.65	YES
5453634	DYNC1LI2	cytoplasmic dynein 1 light intermediate chain 2 isoform 1	Cytoplasm	Biological_process unknown	Molecular function unknown	5	18	54.1	6.38	YES
5453690	DNAJB1	dnaJ homolog subfamily B member 1 isoform 1	Cytoplasm	Protein metabolism	Heat shock protein activity	1	2	38	8.63	YES
5453704	ARL6IP5	PRA1 family protein 3	Cytoplasm	Cell communication	Molecular function unknown	3	14	21.6	9.77	YES
5453710	LASP1	LIM and SH3 domain protein 1 isoform a	Cytosol	Signal transduction	Cytoskeletal protein binding	1	2	29.7	7.05	YES
5453722	LYPLA1	acyl-protein thioesterase 1 isoform 1	Endoplasmic reticulum	Metabolism	Phospholipase activity	2	4	24.7	6.77	YES
5453880	ANP32A	acidic leucine-rich nuclear phosphoprotein 32 family member A	Cytoplasm	Immune response	MHC class I receptor activity	3	8	28.6	4.09	YES
5453908	PITPNA	phosphatidylinositol transfer protein alpha isoform	Cytoplasm	Transport	Transporter activity	1	2	31.8	6.55	YES
5453990	PSME1	proteasome activator complex subunit 1 isoform 1	Nucleus	Protein metabolism	Ubiquitin-specific protease activity	4	20	28.7	6.02	YES
5453998	IPO7	importin-7	Nucleus	Transport	Transporter activity	2	6	119.4	4.82	YES
5454002	DNPH1	2'-deoxynucleoside 5'-phosphate N-hydrolase 1 isoform 1	Nucleus	Biological_process unknown	Molecular function unknown	2	4	19.1	5.05	YES
5454028	RRAS	ras-related protein R-Ras	Plasma membrane	Cell communication	GTPase activity	2	4	23.5	6.93	YES
5454032	S100A1	protein S100-A1	Cytoplasm	Cell communication	Calcium ion binding	2	3	10.5	4.5	YES
5454034	S100B	protein S100-B	Extracellular	Cell communication	Calcium ion binding	2	4	10.7	4.59	YES
5454064	RBM14	RNA-binding protein 14 isoform 1	Nucleus	Regulation of nucleobase, nucleoside, nucleotide and nucleic acid metabolism	RNA binding	3	9	69.4	9.67	YES
5454152	UQCRB	cytochrome b-c1 complex subunit 7 isoform 1	Mitochondrion	Metabolism	Catalytic activity	3	6	13.5	8.78	YES
5729770	TPP1	tripeptidyl-peptidase 1 preproprotein	Lysosome	Protein metabolism	Serine-type peptidase activity	5	30	61.2	6.48	YES
5729779	COPS8	COP9 signalosome complex subunit 8 isoform 1	Cytoplasm	Regulation of signal transduction	Molecular function unknown	1	2	23.2	5.38	YES
5729875	PGRMC1	membrane-associated progesterone receptor component 1 isoform 1	Plasma membrane	Cell communication	Receptor activity	3	12	21.7	4.7	YES
5729937	MTX2	metaxin-2 isoform 1	Mitochondrion	Transport	Molecular function unknown	4	14	29.7	6.29	YES
5729980	PMVK	phosphomevalonate kinase isoform 1	Peroxisome	Metabolism	Lipid kinase activity	1	2	22	5.73	YES
5729991	PSMC4	26S protease regulatory subunit 6B isoform 1	Nucleus	Protein metabolism	Ubiquitin-specific protease activity	8	24	47.3	5.21	YES
5730023	RUVBL2	ruvB-like 2 isoform 1	Cytoplasm	Regulation of nucleobase, nucleoside, nucleotide and nucleic acid metabolism	Transcription regulator activity	12	34	51.1	5.64	YES
5730027	KHDRBS1	KH domain-containing, RNA-binding, signal transduction-associated protein 1 isoform 1	Nucleus	Regulation of nucleobase, nucleoside, nucleotide and nucleic acid metabolism	RNA binding	1	2	48.2	8.66	YES
5730116	DCTN6	dynactin subunit 6	Mitochondrion	Biological_process unknown	Molecular function unknown	1	2	20.7	6.32	YES
5802974	PRDX3	thioredoxin-dependent peroxide reductase, mitochondrial isoform a	Mitochondrion	Metabolism	Peroxidase activity	7	38	27.7	7.78	YES
5802984	B4GAT1	beta-1,4-glucuronyltransferase 1	Golgi apparatus	Metabolism	Transferase activity	10	73	47.1	7.2	YES
5803011	ENO2	gamma-enolase	Cytoplasm	Metabolism	Catalytic activity	22	422	47.2	5.03	YES
5803013	ERP29	endoplasmic reticulum resident protein 29 isoform 1	Endoplasmic reticulum	Protein folding	Chaperone activity	11	34	29	7.31	YES
5803023	LMAN2	vesicular integral-membrane protein VIP36	Golgi apparatus	Transport	Transporter activity	2	8	40.2	6.95	YES
5803036	HNRNPA0	heterogeneous nuclear ribonucleoprotein A0	Nucleus	Regulation of nucleobase, nucleoside, nucleotide and nucleic acid metabolism	RNA binding	2	4	30.8	9.29	YES
5803076	CBX1	chromobox protein homolog 1	Nucleus	Regulation of nucleobase, nucleoside, nucleotide and nucleic acid metabolism	DNA binding	1	4	21.4	4.93	YES
5803121	PDIA5	protein disulfide-isomerase A5	Endoplasmic reticulum	Protein metabolism	Chaperone activity	3	6	59.6	7.91	YES
5803135	RAB35	ras-related protein Rab-35 isoform 1	-	Cell communication	GTPase activity	3	25	23	8.29	YES
5803137	RBM3	RNA-binding protein 3	Nucleolus	Regulation of nucleobase, nucleoside, nucleotide and nucleic acid metabolism	RNA binding	1	4	17.2	8.91	YES
5803177	SNTB2	beta-2-syntrophin	Cytoplasm	Signal transduction	Receptor signaling complex scaffold activity	3	8	57.9	8.82	YES
5803181	STIP1	stress-induced-phosphoprotein 1 isoform b	Nucleus	Cell communication	Receptor signaling complex scaffold activity	10	36	62.6	6.8	YES
5803187	TALDO1	transaldolase	Nucleus	Metabolism	Transferase activity, transferring aldehyde or ketonic groups	5	16	37.5	6.81	YES
5803225	YWHAE	14-3-3 protein epsilon	Cytoplasm	Cell communication	Receptor signaling complex scaffold activity	10	134	29.2	4.74	YES
5803227	YWHAQ	14-3-3 protein theta	Cytoplasm	Cell communication	Receptor signaling complex scaffold activity	16	110	27.7	4.78	YES
5901908	BTN3A3	butyrophilin subfamily 3 member A3 isoform a	Integral to membrane	Biological_process unknown	Molecular function unknown	4	10	65	5.53	YES
5901926	NUDT21	cleavage and polyadenylation specificity factor subunit 5	Nucleus	Regulation of nucleobase, nucleoside, nucleotide and nucleic acid metabolism	RNA binding	5	14	26.2	8.82	YES
5901944	EMILIN1	EMILIN-1	Extracellular	Cell growth and/or maintenance	Extracellular matrix structural constituent	1	2	106.6	5.17	YES
5901948	FAF1	FAS-associated factor 1	Nucleus	Apoptosis	Receptor signaling complex scaffold activity	1	2	73.9	4.88	YES
5901970	HNMT	histamine N-methyltransferase isoform 1	Cytosol	Amino acid and derivative metabolism	Methyltransferase activity	3	6	33.3	5.34	YES
5902076	SRSF1	serine/arginine-rich splicing factor 1 isoform 1	Nucleus	Protein metabolism	RNA binding	3	6	27.7	10.36	YES
5902102	SNRPD1	small nuclear ribonucleoprotein Sm D1 isoform 1	Cytoplasm	Regulation of nucleobase, nucleoside, nucleotide and nucleic acid metabolism	RNA binding	2	4	13.3	11.56	YES
6005721	ERLIN2	erlin-2 isoform 1	-	Biological_process unknown	Molecular function unknown	10	54	37.8	5.62	YES
6005824	SEC23IP	SEC23-interacting protein	Endoplasmic reticulum	Transport	Transporter activity	1	2	111	5.54	YES
6005842	PROSC	proline synthase co-transcribed bacterial homolog protein	Cytoplasm	Metabolism	Racemase and epimerase activity	3	8	30.3	7.5	YES
6005846	TWF2	twinfilin-2	Cytoplasm	Cell communication	Protein-tyrosine kinase activity	1	2	39.5	6.84	YES
6005926	U2AF2	splicing factor U2AF 65 kDa subunit isoform a	Nucleus	RNA metabolism	Spliceosomal catalysis	1	4	53.5	9.09	YES
6005942	VCP	transitional endoplasmic reticulum ATPase	Endoplasmic reticulum	Metabolism	ATPase activity	34	186	89.3	5.26	YES
6005993	CLTA	clathrin light chain A isoform b	Cytoplasm	Cell growth and/or maintenance	Structural molecule activity	1	2	27.1	4.51	YES
6031192	SLC25A3	phosphate carrier protein, mitochondrial isoform a	Mitochondrial membrane	Transport	Transporter activity	3	32	40.1	9.38	YES
6274552	STAT1	signal transducer and activator of transcription 1-alpha/beta isoform alpha	Cytoplasm	Regulation of nucleobase, nucleoside, nucleotide and nucleic acid metabolism	Transcription factor activity	15	37	87.3	6.05	YES
6598323	GDI2	rab GDP dissociation inhibitor beta isoform 1	Cytoplasm	Transport	Auxiliary transport protein activity	9	121	50.6	6.47	YES
6631112	SYNGR3	synaptogyrin-3	Plasma membrane	Transport	Molecular function unknown	2	12	24.5	8.18	YES
6681764	NDUFA9	NADH dehydrogenase [ubiquinone] 1 alpha subcomplex subunit 9, mitochondrial	Mitochondrion	Metabolism	Oxidoreductase activity	5	21	42.5	9.8	YES
6912238	PRDX5	peroxiredoxin-5, mitochondrial isoform a	Mitochondrion	Metabolism	Oxidoreductase activity	8	38	22	8.57	YES
6912240	AP3M1	AP-3 complex subunit mu-1 isoform a	Golgi apparatus	Protein targeting	Protein transporter activity	1	2	46.9	6.93	YES
6912242	APPL1	DCC-interacting protein 13-alpha	Cytoplasm	Cell communication	Receptor signaling complex scaffold activity	2	4	79.6	5.41	YES
6912280	AHSA1	activator of 90 kDa heat shock protein ATPase homolog 1 isoform 1	Cytoplasm	Biological_process unknown	Molecular function unknown	3	14	38.3	5.53	YES
6912328	DDAH1	N(G),N(G)-dimethylarginine dimethylaminohydrolase 1 isoform 1	Cytoplasm	Metabolism	Hydrolase activity	9	45	31.1	5.81	YES
6912482	LETM1	LETM1 and EF-hand domain-containing protein 1, mitochondrial	Plasma membrane	Cell communication	Calcium ion binding	6	12	83.3	6.7	YES
6912494	MAPRE1	microtubule-associated protein RP/EB family member 1	Centrosome	Cell communication	Protein binding	2	3	30	5.14	YES
6912540	NUBP2	cytosolic Fe-S cluster assembly factor NUBP2 isoform 1	Cytoplasm	Protein metabolism	Molecular function unknown	3	8	28.8	5.83	YES
6912582	PEF1	peflin	Cytoplasm	Cell communication	Calcium ion binding	1	2	30.4	6.54	YES
6912586	PGLS	6-phosphogluconolactonase	-	Metabolism	Hydrolase activity	12	34	27.5	6.05	YES
6912618	QPCT	glutaminyl-peptide cyclotransferase	Extracellular	Metabolism	Catalytic activity	8	30	40.9	6.61	YES
6912630	IFIT5	interferon-induced protein with tetratricopeptide repeats 5	-	Biological_process unknown	Molecular function unknown	1	2	55.8	7.4	YES
6912638	RSU1	ras suppressor protein 1 isoform 1	-	Cell adhesion	Molecular function unknown	9	34	31.5	8.65	YES
6912646	NPTN	neuroplastin isoform b	Plasma membrane	Immune response	Antigen binding	4	14	44.4	7.99	YES
6912708	TIMM10	mitochondrial import inner membrane translocase subunit Tim10	Mitochondrial membrane	Protein metabolism	Chaperone activity	1	4	10.3	6.29	YES
6912734	TNPO3	transportin-3 isoform 1	Nucleus	Cell communication	Ligand-dependent nuclear receptor activity	2	4	104.1	5.57	YES
6996021	CYBB	cytochrome b-245 heavy chain	Plasma membrane	Metabolism	Catalytic activity	1	2	65.3	8.63	YES
7019477	HTRA2	serine protease HTRA2, mitochondrial isoform 1 preproprotein	Mitochondrion	Protein metabolism	Serine-type peptidase activity	4	12	48.8	10.07	YES
7019485	PDCD6	programmed cell death protein 6 isoform 1	Cytoplasm	Cell communication	Calcium ion binding	3	5	21.9	5.4	YES
7019519	PCSK1N	proSAAS preproprotein	Extracellular	Hormone metabolism	Molecular function unknown	9	73	27.4	6.62	YES
7019545	NENF	neudesin	Extracellular	Biological_process unknown	Kinase regulator activity	3	6	18.8	5.69	YES
7019569	VPS4A	vacuolar protein sorting-associated protein 4A	Cytoplasm	Cell communication	ATPase activity	1	2	48.9	7.8	YES
7305503	STOML2	stomatin-like protein 2, mitochondrial isoform a	Plasma membrane	Transport	Auxiliary transport protein activity	8	35	38.5	7.39	YES
7330335	CLIC4	chloride intracellular channel protein 4	Plasma membrane	Transport	Intracellular ligand-gated ion channel activity	3	9	28.8	5.59	YES
7427519	MCM6	DNA replication licensing factor MCM6	Nucleus	Regulation of nucleobase, nucleoside, nucleotide and nucleic acid metabolism	Protein binding	1	1	92.8	5.41	YES
7549809	PLS3	plastin-3 isoform 1	Cytoplasm	Cell growth and/or maintenance	Structural molecule activity	5	18	70.8	5.6	YES
7656952	CACYBP	calcyclin-binding protein isoform 1	Cytoplasm	Protein metabolism	Molecular function unknown	5	13	26.2	8.25	YES
7657015	RTCB	tRNA-splicing ligase RtcB homolog	-	Biological_process unknown	Molecular function unknown	3	7	55.2	7.23	YES
7657033	NT5C	5'(3')-deoxyribonucleotidase, cytosolic type isoform 1	Cytoplasm	Metabolism	Hydrolase activity	2	4	23.4	6.64	YES
7657381	PRPF19	pre-mRNA-processing factor 19	Nucleus	Regulation of nucleobase, nucleoside, nucleotide and nucleic acid metabolism	DNA repair protein	4	8	55.1	6.61	YES
7657603	HEBP2	heme-binding protein 2	Cytoplasm	Biological_process unknown	Molecular function unknown	4	14	22.9	4.63	YES
7657647	TMOD2	tropomodulin-2 isoform a	Cytoplasm	Cell growth and/or maintenance	Cytoskeletal protein binding	4	10	39.6	5.27	YES
7661844	CCDC22	coiled-coil domain-containing protein 22	-	Biological_process unknown	Molecular function unknown	5	10	70.7	6.74	YES
7661862	PPM1F	protein phosphatase 1F	Cytoplasm	Cell communication	Protein serine/threonine phosphatase activity	3	10	49.8	5.1	YES
7661890	SNX17	sorting nexin-17 isoform 1	Cytoplasm	Cell communication	Receptor signaling complex scaffold activity	1	2	52.9	7.46	YES
7661920	EIF4A3	eukaryotic initiation factor 4A-III	Nucleus	Regulation of nucleobase, nucleoside, nucleotide and nucleic acid metabolism	Molecular function unknown	2	9	46.8	6.73	YES
7661922	RAB21	ras-related protein Rab-21	Endoplasmic reticulum	Cell communication	GTPase activity	1	1	24.3	7.94	YES
7662036	SPOCK2	testican-2 isoform 2	Extracellular	Cell growth and/or maintenance	Extracellular matrix structural constituent	2	12	46.7	4.83	YES
7662294	EPM2AIP1	EPM2A-interacting protein 1	Endoplasmic reticulum	Biological_process unknown	Molecular function unknown	4	10	70.3	6.11	YES
7662350	CNTNAP2	contactin-associated protein-like 2	Plasma membrane	Cell communication	Cell adhesion molecule activity	1	2	148.1	6.58	YES
7662645	MRPS18B	28S ribosomal protein S18b, mitochondrial	Mitochondrion	Protein metabolism	Structural constituent of ribosome	1	4	29.4	9.38	YES
7669550	VCL	vinculin isoform meta-VCL	Cytoplasm	Cell growth and/or maintenance	Cytoskeletal protein binding	29	91	123.7	5.66	YES
7705558	ISYNA1	inositol-3-phosphate synthase 1 isoform 1	-	Metabolism	Isomerase activity	5	10	61	5.76	YES
7705855	HSD17B12	very-long-chain 3-oxoacyl-CoA reductase	Endoplasmic reticulum	Metabolism	Catalytic activity	2	14	34.3	9.32	YES
7705925	DCXR	L-xylulose reductase isoform 1	Integral to membrane	Metabolism	Oxidoreductase activity	5	15	25.9	8.1	YES
7706322	C14orf166	UPF0568 protein C14orf166	Nucleus	Regulation of nucleobase, nucleoside, nucleotide and nucleic acid metabolism	Transcription regulator activity	7	37	28.1	6.65	YES
7706425	LSM8	LSM8 homolog, U6 small nuclear RNA associated	Cytoplasm	Regulation of nucleobase, nucleoside, nucleotide and nucleic acid metabolism	RNA binding	1	2	10.4	4.48	YES
7706495	DNAJB11	dnaJ homolog subfamily B member 11	Endoplasmic reticulum	Protein metabolism	Chaperone activity	1	2	40.5	6.18	YES
7706497	CMPK1	UMP-CMP kinase isoform a	Cytoplasm	Regulation of nucleobase, nucleoside, nucleotide and nucleic acid metabolism	Catalytic activity	4	10	25.8	7.97	YES
7706667	TRAPPC4	trafficking protein particle complex subunit 4 isoform 1	Cytoplasm	Transport	Transporter activity	1	2	24.3	6.21	YES
7706757	ATP6V1D	V-type proton ATPase subunit D	Integral to membrane	Metabolism	ATPase activity	1	3	28.2	9.36	YES
8051631	RALY	RNA-binding protein Raly isoform 1	Mitochondrion	Regulation of nucleobase, nucleoside, nucleotide and nucleic acid metabolism	RNA binding	2	4	32.4	9.17	YES
8051636	XPOT	exportin-T	Nucleus	Transport	Transporter activity	1	2	109.9	5.39	YES
8393009	VPS51	vacuolar protein sorting-associated protein 51 homolog	-	Biological_process unknown	Molecular function unknown	1	2	86	6.47	YES
8659555	ACO1	cytoplasmic aconitate hydratase	Cytoplasm	Regulation of nucleobase, nucleoside, nucleotide and nucleic acid metabolism	Isomerase activity	6	16	98.3	6.68	YES
8922331	MAGOHB	protein mago nashi homolog 2 isoform 1	Nucleus	Biological_process unknown	Molecular function unknown	1	4	17.3	6.39	YES
8922498	PNPO	pyridoxine-5'-phosphate oxidase	Cytoplasm	Metabolism	Catalytic activity	6	27	30	7.06	YES
8922720	TMEM30A	cell cycle control protein 50A isoform 1	Integral to membrane	Biological_process unknown	Molecular function unknown	4	17	40.7	8.59	YES
8922944	LIN7C	protein lin-7 homolog C	Extracellular	Cell communication	Molecular function unknown	2	10	21.8	8.43	YES
8923001	ABHD10	mycophenolic acid acyl-glucuronide esterase, mitochondrial isoform 1	-	Metabolism	Hydrolase activity	11	47	33.9	8.57	YES
8923421	SARS2	serine--tRNA ligase, mitochondrial isoform b	Mitochondrion	Protein metabolism	Ligase activity	3	10	58.2	8.13	YES
8923819	IMPACT	protein IMPACT	-	Biological_process unknown	Molecular function unknown	1	2	36.4	4.97	YES
8923930	CISD1	CDGSH iron-sulfur domain-containing protein 1	-	Biological_process unknown	Molecular function unknown	1	1	12.2	9.09	YES
9507215	TUBA8	tubulin alpha-8 chain isoform 1	Cytoskeleton	Cell growth and/or maintenance	Cytoskeletal protein binding	1	1208	50.1	5.06	YES
9558755	DNAJB9	dnaJ homolog subfamily B member 9	Endoplasmic reticulum	Protein metabolism	Chaperone activity	2	10	25.5	8.27	YES
9845516	S100A4	protein S100-A4	Cytoplasm	Cell growth and/or maintenance	Calcium ion binding	1	2	11.7	6.11	YES
9910244	MRPS22	28S ribosomal protein S22, mitochondrial	Mitochondrion	Protein metabolism	Structural constituent of ribosome	1	2	41.3	7.9	YES
9910280	UGGT1	UDP-glucose:glycoprotein glucosyltransferase 1	Endoplasmic reticulum	Metabolism	Transferase activity	8	16	177.1	5.63	YES
9910460	NIT2	omega-amidase NIT2	-	Metabolism	Hydrolase activity	11	34	30.6	7.21	YES
9910542	SAR1A	GTP-binding protein SAR1a	Endoplasmic reticulum	Cell communication	GTPase activity	2	4	22.4	6.68	YES
9945439	SEPT5	septin-5 isoform 1	Cytoplasm	Signal transduction	GTP binding	12	52	42.8	6.67	YES
9951915	AHCY	adenosylhomocysteinase isoform 1	Cytoplasm	Metabolism	Hydrolase activity	13	63	47.7	6.34	YES
9955963	ABCB6	ATP-binding cassette sub-family B member 6, mitochondrial	Mitochondrion	Transport	Auxiliary transport protein activity	1	2	93.8	8.48	YES
9966793	LZTFL1	leucine zipper transcription factor-like protein 1 isoform 1	-	Biological_process unknown	Molecular function unknown	2	3	34.6	5.36	YES
9966849	TIGAR	fructose-2,6-bisphosphatase TIGAR	-	Metabolism	Hydrolase activity	2	6	30	7.69	YES
10092657	NDUFA12	NADH dehydrogenase [ubiquinone] 1 alpha subcomplex subunit 12 isoform a	Mitochondrion	Metabolism	Oxidoreductase activity	1	2	17.1	9.63	YES
10092665	SUSD2	sushi domain-containing protein 2	Integral to membrane	Biological_process unknown	Molecular function unknown	2	4	90.2	6.28	YES
10092677	PDXP	pyridoxal phosphate phosphatase	-	Metabolism	Acid phosphatase activity	2	4	31.7	6.55	YES
10346135	MAPRE2	microtubule-associated protein RP/EB family member 2 isoform 1	Centrosome	Cell growth and/or maintenance	Cytoskeletal protein binding	1	6	37	5.57	YES
10567816	GNAO1	guanine nucleotide-binding protein G(o) subunit alpha isoform a	Plasma membrane	Cell communication	GTPase activity	18	237	40	5.53	YES
10800412	MAPRE3	microtubule-associated protein RP/EB family member 3	Cytoskeleton	Cell growth and/or maintenance	Cytoskeletal protein binding	3	9	32	5.54	YES
10835063	NPM1	nucleophosmin isoform 1	Centrosome	Protein metabolism	Chaperone activity	6	44	32.6	4.78	YES
10835067	SSB	lupus La protein	Nucleus	Regulation of nucleobase, nucleoside, nucleotide and nucleic acid metabolism	RNA binding	5	10	46.8	7.12	YES
10863945	XRCC5	X-ray repair cross-complementing protein 5	Nucleus	Regulation of nucleobase, nucleoside, nucleotide and nucleic acid metabolism	DNA repair protein	13	37	82.7	5.81	YES
10864017	ENOPH1	enolase-phosphatase E1 isoform 1	-	Biological_process unknown	Molecular function unknown	1	2	28.9	4.78	YES
10947137	ABCF2	ATP-binding cassette sub-family F member 2 isoform b	Mitochondrion	Immune response	Molecular function unknown	1	2	72.4	7.49	YES
11024698	MGEA5	protein O-GlcNAcase isoform a	Cytoplasm	Metabolism	Hydrolase activity	1	2	102.8	4.91	YES
11038643	AP2S1	AP-2 complex subunit sigma isoform AP17delta	Plasma membrane	Cell communication	Receptor signaling complex scaffold activity	3	16	12.4	5.85	YES
11055998	GNB4	guanine nucleotide-binding protein subunit beta-4	Plasma membrane	Cell communication	GTPase activity	2	42	37.5	6	YES
11056036	TTLL12	tubulin--tyrosine ligase-like protein 12	Nucleus	Metabolism	Ligase activity	1	2	74.4	5.53	YES
11056044	PPA1	inorganic pyrophosphatase	Cytoplasm	Metabolism	Catalytic activity	4	20	32.6	5.86	YES
11056046	CADM3	cell adhesion molecule 3 isoform 1	Plasma membrane	Immune response	Antigen binding	12	63	47	5.38	YES
11056061	TMSB4X	thymosin beta-4	Cytoplasm	Cell growth and/or maintenance	Cytoskeletal protein binding	2	6	5.1	5.06	YES
11095441	ALDH6A1	methylmalonate-semialdehyde dehydrogenase [acylating], mitochondrial isoform 1	Mitochondrion	Metabolism	Catalytic activity	8	16	57.8	8.5	YES
11128019	CYCS	cytochrome c	Mitochondrion	Metabolism	Catalytic activity	4	8	11.7	9.57	YES
11321561	HPX	hemopexin	Extracellular	Transport	Transporter activity	8	41	51.6	7.02	YES
11321583	SUCLA2	succinyl-CoA ligase [ADP-forming] subunit beta, mitochondrial	Mitochondrion	Metabolism	Ligase activity	11	42	50.3	7.42	YES
11321640	SNTB1	beta-1-syntrophin	Cytoplasm	Cell communication	Receptor signaling complex scaffold activity	1	4	58	8.63	YES
11342680	ACTR1B	beta-centractin	Cytoplasm	Cell growth and/or maintenance	Structural constituent of cytoskeleton	1	6	42.3	6.4	YES
11386135	BCKDHA	2-oxoisovalerate dehydrogenase subunit alpha, mitochondrial isoform 1	Mitochondrion	Metabolism	Catalytic activity	1	2	50.4	8.27	YES
11496277	LAMTOR3	ragulator complex protein LAMTOR3 isoform 1	Endosome	Cell communication	Receptor signaling complex scaffold activity	1	2	13.6	7.34	YES
11496885	PDLIM7	PDZ and LIM domain protein 7 isoform 1	Cytoskeleton	Cell communication	Receptor signaling complex scaffold activity	1	2	49.8	8.41	YES
11545863	MCCC2	methylcrotonoyl-CoA carboxylase beta chain, mitochondrial	Mitochondrion	Metabolism	Ligase activity	2	4	61.3	7.68	YES
11545906	FN3K	fructosamine-3-kinase	-	Protein metabolism	Transferase activity	1	4	35.1	7.55	YES
11545918	TINAGL1	tubulointerstitial nephritis antigen-like isoform 1	Extracellular	Transport	Transporter activity	6	37	52.4	6.99	YES
11545920	LIN7B	protein lin-7 homolog B isoform 1	Plasma membrane	Cell communication	Receptor signaling complex scaffold activity	1	4	22.9	8.66	YES
11559929	COPG1	coatomer subunit gamma-1	Golgi apparatus	Transport	Transporter activity	5	13	97.7	5.47	YES
11761619	GMPPB	mannose-1-phosphate guanyltransferase beta isoform 1	-	Metabolism	Phosphorylase activity	2	4	42.6	6.46	YES
11863154	ARCN1	coatomer subunit delta isoform 1	Cytoplasm	Transport	Transporter activity	5	10	57.2	6.21	YES
12056473	NANS	sialic acid synthase	Cytoplasm	Metabolism	Catalytic activity	4	13	40.3	6.74	YES
12408677	PFDN4	prefoldin subunit 4	Cytoplasm	Protein metabolism	Chaperone activity	1	2	15.3	4.53	YES
13027602	DDRGK1	DDRGK domain-containing protein 1	-	Biological_process unknown	Molecular function unknown	1	2	35.6	5.12	YES
13027640	AASS	alpha-aminoadipic semialdehyde synthase, mitochondrial	Mitochondrion	Metabolism	Oxidoreductase activity	1	2	102.1	6.64	YES
13027812	GH1	somatotropin isoform 1	Extracellular	Cell communication	Cytokine activity	4	937	24.8	5.43	YES
13027814	GH1	somatotropin isoform 2	Extracellular	Cell communication	Cytokine activity	2	463	23	5.6	YES
13129010	NUDT9	ADP-ribose pyrophosphatase, mitochondrial isoform a	Cytoplasm	Ion transport	Catalytic activity	1	2	39.1	8.22	YES
13129018	GGCT	gamma-glutamylcyclotransferase isoform 1	-	Biological_process unknown	Molecular function unknown	1	2	21	5.14	YES
13129092	TMEM109	transmembrane protein 109	-	Biological_process unknown	Molecular function unknown	1	2	26.2	10.48	YES
13236587	TMEM43	transmembrane protein 43	Integral to membrane	Biological_process unknown	Molecular function unknown	5	22	44.8	8.13	YES
13259510	DCTN1	dynactin subunit 1 isoform 1	Cytoplasm	Transport	Structural constituent of cytoskeleton	6	24	141.6	5.81	YES
13324688	WDR11	WD repeat-containing protein 11	-	Biological_process unknown	Molecular function unknown	1	2	136.6	6.92	YES
13325075	QSOX1	sulfhydryl oxidase 1 isoform a	Extracellular matrix	Regulation of cell cycle	Molecular function unknown	2	4	82.5	8.92	YES
13375727	ACSS3	acyl-CoA synthetase short-chain family member 3, mitochondrial	-	Metabolism	Molecular function unknown	3	6	74.7	8.63	YES
13376007	ISOC2	isochorismatase domain-containing protein 2 isoform 2	-	Metabolism	Molecular function unknown	5	15	24.1	7.77	YES
13376212	UBA5	ubiquitin-like modifier-activating enzyme 5 isoform 1	Integral to membrane	Protein metabolism	Protein binding	1	4	44.8	4.84	YES
13376331	L2HGDH	L-2-hydroxyglutarate dehydrogenase, mitochondrial	Mitochondrion	Metabolism	Catalytic activity	1	1	50.3	8.15	YES
13376617	PTGES2	prostaglandin E synthase 2 isoform 1	Endoplasmic reticulum	Metabolism	Isomerase activity	2	6	41.9	9.16	YES
13489087	SERPINB1	leukocyte elastase inhibitor	Cytoplasm	Protein metabolism	Protease inhibitor activity	9	32	42.7	6.28	YES
13559514	PI4K2A	phosphatidylinositol 4-kinase type 2-alpha	Endoplasmic reticulum	Cell communication	Lipid kinase activity	1	2	54	8.29	YES
13569956	ARPC5L	actin-related protein 2/3 complex subunit 5-like protein	-	Biological_process unknown	Molecular function unknown	1	2	16.9	6.6	YES
13569962	RAB1B	ras-related protein Rab-1B	Cytoplasmic vesicle	Cell communication	GTPase activity	2	27	22.2	5.73	YES
13654237	PRKDC	DNA-dependent protein kinase catalytic subunit isoform 1	Cytoplasm	Cell communication	Protein serine/threonine kinase activity	3	6	468.8	7.12	YES
13676857	HSPA2	heat shock-related 70 kDa protein 2	Cytoplasm	Protein metabolism	Heat shock protein activity	2	176	70	5.74	YES
13699803	WASF3	wiskott-Aldrich syndrome protein family member 3 isoform 1	Nucleus	Cell growth and/or maintenance	Cytoskeletal protein binding	1	2	55.3	6.43	YES
13775198	SH3BGRL3	SH3 domain-binding glutamic acid-rich-like protein 3	Cytoplasm	Biological_process unknown	Molecular function unknown	1	2	10.4	4.93	YES
13775238	PLVAP	plasmalemma vesicle-associated protein	Plasma membrane	Biological_process unknown	Molecular function unknown	2	4	50.6	8.79	YES
13904870	RPS5	40S ribosomal protein S5	Ribosome	Protein metabolism	Structural constituent of ribosome	1	4	22.9	9.72	YES
14043022	MARS	methionine--tRNA ligase, cytoplasmic	Cytoplasm	Protein metabolism	Ligase activity	3	6	101.1	6.16	YES
14043070	HNRNPA1	heterogeneous nuclear ribonucleoprotein A1 isoform b	Nucleus	Regulation of nucleobase, nucleoside, nucleotide and nucleic acid metabolism	RNA binding	7	46	38.7	9.13	YES
14110407	HNRNPDL	heterogeneous nuclear ribonucleoprotein D-like isoform a	-	-	-	1	12	46.4	9.57	YES
14110420	HNRNPD	heterogeneous nuclear ribonucleoprotein D0 isoform a	Nucleus	Regulation of nucleobase, nucleoside, nucleotide and nucleic acid metabolism	MRNA binding	5	30	38.4	7.81	YES
14141152	HNRNPM	heterogeneous nuclear ribonucleoprotein M isoform a	Plasma membrane	Regulation of nucleobase, nucleoside, nucleotide and nucleic acid metabolism	Ribonucleoprotein	13	50	77.5	8.7	YES
14141168	PCBP2	poly(rC)-binding protein 2 isoform a	Nucleus	Regulation of nucleobase, nucleoside, nucleotide and nucleic acid metabolism	RNA binding	6	46	38.6	6.79	YES
14149716	PPP1R12C	protein phosphatase 1 regulatory subunit 12C isoform a	Cytoplasm	Metabolism	Protein binding	4	8	84.8	5.57	YES
14149734	CORO1B	coronin-1B	-	Cell motility	Molecular function unknown	4	10	54.2	5.88	YES
14150147	NUDT16L1	protein syndesmos isoform 1	Nucleolus	Cell communication	Molecular function unknown	1	2	23.3	8.91	YES
14165437	HNRNPK	heterogeneous nuclear ribonucleoprotein K isoform a	Nucleolus	Regulation of nucleobase, nucleoside, nucleotide and nucleic acid metabolism	Ribonucleoprotein	16	91	51	5.33	YES
14210488	DCTN5	dynactin subunit 5 isoform 1	-	Biological_process unknown	Molecular function unknown	1	2	20.1	8.02	YES
14210536	TUBB6	tubulin beta-6 chain isoform 1	-	Cell growth and/or maintenance	Structural constituent of cytoskeleton	7	789	49.8	4.88	YES
14211923	HINT2	histidine triad nucleotide-binding protein 2, mitochondrial	Mitochondrion	Metabolism	Hydrolase activity	1	2	17.2	9.16	YES
14249342	INA	alpha-internexin	Cytoplasm	Cell growth and/or maintenance	Structural constituent of cytoskeleton	34	659	55.4	5.4	YES
14277700	RPS12	40S ribosomal protein S12	Ribosome	Protein metabolism	Structural constituent of ribosome	2	4	14.5	7.21	YES
14589889	CDH2	cadherin-2 isoform 1 preproprotein	Plasma membrane	Cell communication	Cell adhesion molecule activity	3	14	99.7	4.81	YES
14670350	GTF2I	general transcription factor II-I isoform 1	Cytoplasm	Regulation of nucleobase, nucleoside, nucleotide and nucleic acid metabolism	Transcription factor activity	3	10	112.3	6.39	YES
14719392	CFL2	cofilin-2 isoform 1	Cytoplasm	Cytoskeleton organization and biogenesis	Cytoskeletal protein binding	2	15	18.7	7.88	YES
15011918	ATP6AP2	renin receptor	Plasma membrane	Cell communication	Receptor activity	12	57	39	6.1	YES
15055537	SCGN	secretagogin	Cytoplasm	Cell communication	Calcium ion binding	40	361	32	5.41	YES
15055539	RPS2	40S ribosomal protein S2	Ribosome	Protein metabolism	Structural constituent of ribosome	2	4	31.3	10.24	YES
15088795	PIGS	GPI transamidase component PIG-S	Microsome	Cell growth and/or maintenance	Cytoskeletal anchoring activity	1	2	61.6	6.49	YES
15147219	PURB	transcriptional activator protein Pur-beta	Nucleus	Regulation of nucleobase, nucleoside, nucleotide and nucleic acid metabolism	Transcription regulator activity	1	2	33.2	5.43	YES
15149476	RARS	arginine--tRNA ligase, cytoplasmic	Cytoplasm	Protein metabolism	Ligase activity	3	6	75.3	6.68	YES
15277342	HSD17B8	estradiol 17-beta-dehydrogenase 8	-	Metabolism	Catalytic activity	1	2	27	6.54	YES
15431288	RPL10A	60S ribosomal protein L10a	Ribosome	Protein metabolism	Structural constituent of ribosome	3	8	24.8	9.94	YES
15431293	RPL15	60S ribosomal protein L15 isoform 1	Ribosome	Protein metabolism	Structural constituent of ribosome	1	2	24.1	11.62	YES
15431295	RPL13	60S ribosomal protein L13 isoform 1	Ribosome	Protein metabolism	RNA binding	2	8	24.2	11.65	YES
15431303	RPL9	60S ribosomal protein L9	Ribosome	Protein metabolism	Structural constituent of ribosome	1	2	21.9	9.95	YES
15431310	KRT14	keratin, type I cytoskeletal 14	Cytoplasm	Cell growth and/or maintenance	Structural constituent of cytoskeleton	2	36	51.6	5.16	YES
15451856	CAV1	caveolin-1 isoform alpha	Plasma membrane	Cell growth and/or maintenance	Structural molecule activity	1	4	20.5	6.02	YES
15812198	FBXO2	F-box only protein 2	Cytoplasm	Protein metabolism	Ubiquitin-specific protease activity	7	45	33.3	4.37	YES
16418379	STX1B	syntaxin-1B	Integral to membrane	Transport	Auxiliary transport protein activity	2	8	33.2	5.38	YES
16418381	VPS26B	vacuolar protein sorting-associated protein 26B	Plasma membrane	Transport	Transporter activity	1	1	39.1	7.36	YES
16445029	IGSF8	immunoglobulin superfamily member 8	Plasma membrane	Immune response	Antigen binding	8	21	65	8	YES
16445419	SCAMP3	secretory carrier-associated membrane protein 3 isoform 1	Golgi apparatus	Transport	Auxiliary transport protein activity	1	2	38.3	7.64	YES
16445426	WDR13	WD repeat-containing protein 13 isoform 1	Nucleus	Regulation of nucleobase, nucleoside, nucleotide and nucleic acid metabolism	Transcription regulator activity	1	2	53.7	9.23	YES
16507237	HSPA5	78 kDa glucose-regulated protein	Endoplasmic reticulum	Protein metabolism	Chaperone activity	32	245	72.3	5.16	YES
16579885	RPL4	60S ribosomal protein L4	Ribosome	Protein metabolism	Structural constituent of ribosome	4	9	47.7	11.06	YES
16751921	DCD	dermcidin isoform 1 preproprotein	Extracellular	Immune response	Molecular function unknown	2	6	11.3	6.54	YES
16753207	UBQLN2	ubiquilin-2	Cytoplasm	Protein metabolism	Ubiquitin-specific protease activity	3	6	65.7	5.22	YES
16753215	PFN2	profilin-2 isoform a	Cytoplasm	Cell growth and/or maintenance	Structural molecule activity	2	6	15	6.99	YES
16933546	RPLP0	60S acidic ribosomal protein P0	Nucleus	Protein metabolism	Structural constituent of ribosome	3	16	34.3	5.97	YES
17017988	COX5B	cytochrome c oxidase subunit 5B, mitochondrial	Mitochondrion	Metabolism	Oxidoreductase activity	1	2	13.7	8.81	YES
17136148	ATP6AP1	V-type proton ATPase subunit S1	-	Transport	Transporter activity	2	4	52	6.14	YES
17149828	NAA15	N-alpha-acetyltransferase 15, NatA auxiliary subunit	Cytoplasm	Metabolism	Transferase activity	2	4	101.2	7.42	YES
17149830	GIT2	ARF GTPase-activating protein GIT2 isoform 1	Nucleus	Cell communication	GTPase activator activity	1	2	84.5	7.23	YES
17149834	SORT1	sortilin isoform 1 preproprotein	Golgi apparatus	Cell communication	Receptor activity	1	2	92	5.74	YES
17149836	FKBP1A	peptidyl-prolyl cis-trans isomerase FKBP1A isoform a	Cytoplasm	Cell communication	Isomerase activity	2	8	11.9	8.16	YES
17149842	FKBP2	peptidyl-prolyl cis-trans isomerase FKBP2	Endoplasmic reticulum lumen	Cell communication	Isomerase activity	1	2	15.6	9.13	YES
17865802	VPS4B	vacuolar protein sorting-associated protein 4B	Perinuclear region	Transport	Transporter activity	1	2	49.3	7.23	YES
17921989	TUBA4A	tubulin alpha-4A chain isoform 1	Cytoplasm	Cell growth and/or maintenance	Structural constituent of cytoskeleton	12	1714	49.9	5.06	YES
17978477	VPS11	vacuolar protein sorting-associated protein 11 homolog isoform 1	Endosome	Transport	Transporter activity	1	2	107.7	7.05	YES
17978485	VPS18	vacuolar protein sorting-associated protein 18 homolog	Cytoplasm	Transport	Transporter activity	1	2	110.1	6.07	YES
17978519	VPS26A	vacuolar protein sorting-associated protein 26A isoform 1	Cytoplasm	Transport	Transporter activity	1	2	38.1	6.57	YES
17986001	HLA-B	major histocompatibility complex, class I, B	Plasma membrane	Immune response	MHC class I receptor activity	3	15	40.4	5.85	YES
17986258	MYL6	myosin light polypeptide 6 isoform 1	Cytoskeleton	Cell growth and/or maintenance	Structural constituent of cytoskeleton	5	24	16.9	4.65	YES
17999541	VPS35	vacuolar protein sorting-associated protein 35	Cytoplasm	Transport	Transporter activity	12	41	91.6	5.49	YES
18087855	DYNLL2	dynein light chain 2, cytoplasmic	Cytoplasm	Cell growth and/or maintenance	Motor activity	1	4	10.3	7.37	YES
18105056	VPS33A	vacuolar protein sorting-associated protein 33A	Golgi apparatus	Transport	Transporter activity	1	2	67.6	6.96	YES
18105063	VPS45	vacuolar protein sorting-associated protein 45 isoform 1	Golgi apparatus	Transport	Transporter activity	3	6	65	8.24	YES
18375505	APEX1	DNA-(apurinic or apyrimidinic site) lyase	Cytoplasm	Regulation of nucleobase, nucleoside, nucleotide and nucleic acid metabolism	DNA repair protein	1	2	35.5	8.12	YES
18375623	DDX39B	spliceosome RNA helicase DDX39B	-	-	-	6	20	49	5.67	YES
18379349	VAT1	synaptic vesicle membrane protein VAT-1 homolog	Cytoplasmic vesicle	Transport	Transporter activity	25	262	41.9	6.29	YES
18390331	GFM1	elongation factor G, mitochondrial isoform 2	Mitochondrion	Protein metabolism	Translation regulator activity	2	6	83.4	7.01	YES
18491024	DPP3	dipeptidyl peptidase 3 isoform 1	Cytoplasm	Protein metabolism	Aminopeptidase activity	5	12	82.5	5.1	YES
18497300	ATP6V1G2	V-type proton ATPase subunit G 2 isoform a	-	Transport	ATPase activity	1	5	13.6	10.26	YES
18543329	PSMD9	26S proteasome non-ATPase regulatory subunit 9 isoform 1	Cytoplasm	Protein metabolism	Ubiquitin-specific protease activity	5	10	24.7	6.95	YES
18699732	SDF4	45 kDa calcium-binding protein isoform 2	Golgi lumen	Cell communication	Calcium ion binding	1	2	41.8	4.86	YES
19526773	ATG3	ubiquitin-like-conjugating enzyme ATG3 isoform 1	Cytoplasm	Biological_process unknown	Molecular function unknown	1	2	35.8	4.74	YES
19557645	SCG3	secretogranin-3 isoform 1	Secretory granule	Protein metabolism	Molecular function unknown	7	36	53	5.03	YES
19557691	SURF4	surfeit locus protein 4 isoform 1	Cytoplasm	Transport	Auxiliary transport protein activity	2	8	30.4	7.78	YES
19743813	ITGB1	integrin beta-1 isoform 1A	Plasma membrane	Cell communication	Receptor activity	7	22	88.4	5.39	YES
19743875	FH	fumarate hydratase, mitochondrial	Mitochondrion	Metabolism	Catalytic activity	6	34	54.6	8.76	YES
19913412	MVP	major vault protein isoform 1	Cytoplasm	Cell growth and/or maintenance	Nucleocytoplasmic transporter activity	25	81	99.3	5.48	YES
19913414	AP2A1	AP-2 complex subunit alpha-1 isoform 1	Plasma membrane	Transport	Transporter activity	12	99	107.5	7.03	YES
19913424	ATP6V1A	V-type proton ATPase catalytic subunit A	Plasma membrane	Metabolism	Transporter activity	34	271	68.3	5.52	YES
19913428	ATP6V1B2	V-type proton ATPase subunit B, brain isoform	Endosome	Transport	Transporter activity	21	141	56.5	5.81	YES
19913432	ATP6V0D1	V-type proton ATPase subunit d 1	-	Transport	ATPase activity	11	69	40.3	5	YES
19920317	CKAP4	cytoskeleton-associated protein 4	Plasma membrane	Cell growth and/or maintenance	Cytoskeletal protein binding	5	9	66	5.92	YES
19923142	KPNB1	importin subunit beta-1 isoform 1	Cytoplasm	Transport	Transporter activity	15	89	97.1	4.78	YES
19923193	ST13	hsc70-interacting protein isoform 1	Lysosome	Cell communication	Receptor signaling complex scaffold activity	5	24	41.3	5.27	YES
19923233	SCP2	non-specific lipid-transfer protein isoform 1	Cytoplasm	Lipid metabolism	Sterol transporter activity	1	2	59	6.89	YES
19923315	SHMT2	serine hydroxymethyltransferase, mitochondrial isoform 1	Mitochondrion	Metabolism	Methyltransferase activity	1	2	56	8.53	YES
19923437	AK3	GTP:AMP phosphotransferase AK3, mitochondrial isoform a	Mitochondrion	Metabolism	Catalytic activity	15	48	25.6	9.16	YES
19923483	RAB14	ras-related protein Rab-14	Integral to membrane	Cell communication	GTPase activity	5	38	23.9	6.21	YES
19923669	SEL1L	protein sel-1 homolog 1 isoform 1	Cytoplasmic vesicle	Biological_process unknown	Binding	1	2	88.7	5.39	YES
19923748	DLST	dihydrolipoyllysine-residue succinyltransferase component of 2-oxoglutarate dehydrogenase complex, mitochondrial isoform 1	Mitochondrion	Metabolism	Acyltransferase activity	12	62	48.7	8.95	YES
19923821	DPYSL5	dihydropyrimidinase-related protein 5	Cytoplasm	Biological_process unknown	Molecular function unknown	13	38	61.4	7.2	YES
19923830	PBXIP1	pre-B-cell leukemia transcription factor-interacting protein 1 isoform 1	Cytoplasm	Regulation of nucleobase, nucleoside, nucleotide and nucleic acid metabolism	Transcription regulator activity	5	14	80.6	5.33	YES
19923919	REEP6	receptor expression-enhancing protein 6	Integral to membrane	Biological_process unknown	Molecular function unknown	1	2	20.7	8.56	YES
19923973	KCTD12	BTB/POZ domain-containing protein KCTD12	-	Transport	Ion channel activity	3	12	35.7	5.64	YES
19923985	RAB3C	ras-related protein Rab-3C isoform 1	Cytoplasmic vesicle	Transport	GTPase activity	3	43	25.9	5.24	YES
19924099	SYN1	synapsin-1 isoform Ia	Cytoplasm	Transport	Transporter activity	17	114	74.1	9.83	YES
19924103	SYN2	synapsin-2 isoform IIa	Synaptic vesicle	Cell communication	Molecular function unknown	7	31	63	8.41	YES
20070125	P4HB	protein disulfide-isomerase	Endoplasmic reticulum	Protein metabolism	Isomerase activity	22	69	57.1	4.87	YES
20070197	DDOST	dolichyl-diphosphooligosaccharide--protein glycosyltransferase 48 kDa subunit	Endoplasmic reticulum	Metabolism	Galactosyltransferase activity	1	4	50.7	6.4	YES
20070220	PRMT5	protein arginine N-methyltransferase 5 isoform a	Cytoplasm	Cell communication	Methyltransferase activity	1	4	72.6	6.29	YES
20070228	NUCB1	nucleobindin-1	Golgi apparatus	Cell communication	Calcium ion binding	7	20	53.8	5.25	YES
20127408	HADHA	trifunctional enzyme subunit alpha, mitochondrial	Mitochondrion	Metabolism	Catalytic activity	33	165	82.9	9.04	YES
20127450	PRKCB	protein kinase C beta type isoform 2	Cytoplasm	Signal transduction	Protein serine/threonine kinase activity	1	4	77	7.02	YES
20127454	ATIC	bifunctional purine biosynthesis protein PURH	-	Metabolism	Hydrolase activity	23	68	64.6	6.71	YES
20143480	CDS2	phosphatidate cytidylyltransferase 2	Mitochondrion	Metabolism	Nucleotidyltransferase activity	1	2	51.4	7.09	YES
20149498	FTL	ferritin light chain	Cytoplasm	Transport	Storage protein	6	42	20	5.78	YES
20149568	NDUFV1	NADH dehydrogenase [ubiquinone] flavoprotein 1, mitochondrial isoform 1	Mitochondrion	Metabolism	Oxidoreductase activity	7	14	50.8	8.21	YES
20149594	HSP90AB1	heat shock protein HSP 90-beta isoform a	Cytoplasm	Cell communication	Chaperone activity	21	405	83.2	5.03	YES
20149675	EFHD2	EF-hand domain-containing protein D2	Nucleus	Biological_process unknown	Molecular function unknown	2	4	26.7	5.2	YES
20270343	ARL8A	ADP-ribosylation factor-like protein 8A isoform 1	-	Cell communication	GTPase activity	1	2	21.4	7.77	YES
20270371	CMBL	carboxymethylenebutenolidase homolog	-	Biological_process unknown	Molecular function unknown	4	10	28	7.18	YES
20336212	GAMT	guanidinoacetate N-methyltransferase isoform b	-	Protein metabolism	Acyltransferase activity	1	2	29.4	5.87	YES
20336225	RHD	blood group Rh(D) polypeptide isoform 1	Plasma membrane	Transport	Channel or pore class transporter activity	1	1	45.2	8.5	YES
20336242	PCSK1	neuroendocrine convertase 1 isoform 1 preproprotein	Extracellular	Protein metabolism	Serine-type peptidase activity	25	284	84.1	5.99	YES
20336244	PCSK2	neuroendocrine convertase 2 isoform 1 preproprotein	-	Protein metabolism	Molecular function unknown	1	2	70.5	6.49	YES
20336270	GNB5	guanine nucleotide-binding protein subunit beta-5 isoform b	Membrane fraction	Signal transduction	GTPase activity	1	2	43.5	6.46	YES
20336761	HEBP1	heme-binding protein 1	Cytoplasm	Biological_process unknown	Molecular function unknown	2	10	21.1	5.8	YES
20357529	GNB2	guanine nucleotide-binding protein G(I)/G(S)/G(T) subunit beta-2	Cytoplasm	Cell communication	GTPase activity	7	121	37.3	6	YES
20357568	AASDHPPT	L-aminoadipate-semialdehyde dehydrogenase-phosphopantetheinyl transferase	Cytoplasm	Metabolism	Catalytic activity	1	2	35.8	6.8	YES
20531765	SPRYD7	SPRY domain-containing protein 7 isoform 1	-	Biological_process unknown	Molecular function unknown	2	4	21.7	6.7	YES
21071030	A1BG	alpha-1B-glycoprotein	Extracellular	Biological_process unknown	Molecular function unknown	7	24	54.2	5.86	YES
21264315	EHD4	EH domain-containing protein 4	Extracellular	Cell communication	Calcium ion binding	12	28	61.1	6.76	YES
21264318	AMPD2	AMP deaminase 2 isoform 1	Cytoplasm	Metabolism	Deaminase activity	2	4	100.6	6.93	YES
21265104	TSPAN7	tetraspanin-7	Plasma membrane	Cell communication	Receptor activity	1	6	27.6	7.2	YES
21361091	UCHL1	ubiquitin carboxyl-terminal hydrolase isozyme L1	Cytoplasm	Protein metabolism	Ubiquitin-specific protease activity	19	236	24.8	5.48	YES
21361103	SLC25A12	calcium-binding mitochondrial carrier protein Aralar1	Mitochondrion	Transport	Transporter activity	17	95	74.7	8.38	YES
21361114	SLC25A11	mitochondrial 2-oxoglutarate/malate carrier protein isoform 1	Mitochondrion	Transport	Auxiliary transport protein activity	12	59	34	9.91	YES
21361176	ALDH1A1	retinal dehydrogenase 1	-	Aldehyde metabolism	Aldehyde dehydrogenase activity	14	86	54.8	6.73	YES
21361181	ATP1A1	sodium/potassium-transporting ATPase subunit alpha-1 isoform a	Plasma membrane	Transport	ATPase activity	13	194	112.8	5.49	YES
21361340	GSK3B	glycogen synthase kinase-3 beta isoform 1	Cytoplasm	Metabolism	Protein serine/threonine kinase activity	1	2	48	8.78	YES
21361370	PYGB	glycogen phosphorylase, brain form	Cytoplasm	Metabolism	Phosphorylase activity	15	79	96.6	6.86	YES
21361399	PPP2R1A	serine/threonine-protein phosphatase 2A 65 kDa regulatory subunit A alpha isoform	Cytoplasm	Cell communication	Protein serine/threonine phosphatase activity	20	67	65.3	5.11	YES
21361462	EHD2	EH domain-containing protein 2	Nucleus	Cell communication	Molecular function unknown	5	12	61.1	6.46	YES
21361497	ACAD9	acyl-CoA dehydrogenase family member 9, mitochondrial	Mitochondrion	Metabolism	Catalytic activity	1	2	68.7	7.96	YES
21361559	VSNL1	visinin-like protein 1	Plasma membrane	Cell communication	Calcium ion binding	1	2	22.1	5.15	YES
21361565	ATP5F1	ATP synthase F(0) complex subunit B1, mitochondrial	Mitochondrion	Metabolism	Transporter activity	9	28	28.9	9.36	YES
21361619	TOLLIP	toll-interacting protein isoform 1	Cytoplasm	Cell communication	Receptor signaling complex scaffold activity	4	14	30.3	5.97	YES
21361621	PGM1	phosphoglucomutase-1 isoform 1	Cytoplasm	Metabolism	Catalytic activity	20	50	61.4	6.76	YES
21361633	LRRC40	leucine-rich repeat-containing protein 40	-	Biological_process unknown	Molecular function unknown	1	2	68.2	6.43	YES
21361647	AHCYL1	adenosylhomocysteinase 2 isoform a	Cytoplasm	Metabolism	Hydrolase activity	3	13	58.9	6.89	YES
21361657	PDIA3	protein disulfide-isomerase A3	Endoplasmic reticulum	Protein metabolism	Isomerase activity	28	160	56.7	6.35	YES
21361659	IPO9	importin-9	Cytoplasm	Transport	Transporter activity	1	2	115.9	4.81	YES
21361741	VTA1	vacuolar protein sorting-associated protein VTA1 homolog isoform a	-	Biological_process unknown	Molecular function unknown	1	1	33.9	6.29	YES
21361743	NIPSNAP3B	protein NipSnap homolog 3B	-	Transport	Transporter activity	3	16	28.3	9.28	YES
21361794	CAND1	cullin-associated NEDD8-dissociated protein 1	Nucleus	Regulation of nucleobase, nucleoside, nucleotide and nucleic acid metabolism	Transcription regulator activity	21	92	136.3	5.78	YES
21361837	PITHD1	PITH domain-containing protein 1	-	Biological_process unknown	Molecular function unknown	1	2	24.2	5.74	YES
21361884	RAB2B	ras-related protein Rab-2B isoform 1	Golgi apparatus	Cell communication	GTPase activity	1	6	24.2	7.83	YES
21361933	ITFG1	T-cell immunomodulatory protein isoform 1	Plasma membrane	Immune response	Molecular function unknown	4	10	68.1	5.39	YES
21396489	LONP1	lon protease homolog, mitochondrial isoform 1	Mitochondrion	Protein metabolism	Serine-type peptidase activity	17	47	106.4	6.39	YES
21464101	YWHAG	14-3-3 protein gamma	Cytoplasm	Cell communication	Receptor signaling complex scaffold activity	14	117	28.3	4.89	YES
21536286	CKB	creatine kinase B-type	Cytoplasm	Metabolism	Catalytic activity	24	374	42.6	5.59	YES
21536449	PFDN1	prefoldin subunit 1	Cytoplasm	Protein metabolism	Chaperone activity	1	2	14.2	6.81	YES
21618344	STAT5B	signal transducer and activator of transcription 5B	Cytoplasm	Regulation of nucleobase, nucleoside, nucleotide and nucleic acid metabolism	Transcription factor activity	9	22	89.8	6.05	YES
21626466	MATR3	matrin-3 isoform a	Nucleus	Regulation of nucleobase, nucleoside, nucleotide and nucleic acid metabolism	RNA binding	13	32	94.6	6.25	YES
21735485	ATPAF2	ATP synthase mitochondrial F1 complex assembly factor 2	Mitochondrion	Metabolism	Molecular function unknown	1	4	32.8	7.09	YES
21735596	PDCD4	programmed cell death protein 4 isoform 1	Nucleus	Apoptosis	Molecular function unknown	2	4	51.7	5.21	YES
21735621	MDH2	malate dehydrogenase, mitochondrial isoform 1	Mitochondrion	Metabolism	Catalytic activity	12	104	35.5	8.68	YES
21956645	MTPN	myotrophin	Cytoplasm	Protein metabolism	Protein binding	2	5	12.9	5.52	YES
22035696	SYNGR1	synaptogyrin-1 isoform 1a	Integral to membrane	Transport	Molecular function unknown	2	8	25.4	4.68	YES
22202624	GSTZ1	maleylacetoacetate isomerase isoform 1	-	Metabolism	Glutathione transferase activity	1	2	24.1	7.71	YES
22267436	NIPSNAP3A	protein NipSnap homolog 3A	Plasma membrane	Transport	Transporter activity	8	46	28.4	9.16	YES
22538431	CTSB	cathepsin B isoform 1 preproprotein	Cytoplasm	Protein metabolism	Cysteine-type peptidase activity	4	19	37.8	6.3	YES
22538442	CTSZ	cathepsin Z preproprotein	Lysosome	Protein metabolism	Cysteine-type peptidase activity	3	8	33.8	7.11	YES
22538444	TP53I3	quinone oxidoreductase PIG3 isoform 1	Cytoplasm	Cell communication	Oxidoreductase activity	1	1	35.5	7.17	YES
22538465	PSMB3	proteasome subunit beta type-3	Nucleus	Protein metabolism	Ubiquitin-specific protease activity	3	8	22.9	6.55	YES
22538467	PSMB4	proteasome subunit beta type-4	Cytoplasm	Protein metabolism	Ubiquitin-specific protease activity	2	8	29.2	5.97	YES
22749479	CNPY4	protein canopy homolog 4	-	Biological_process unknown	Molecular function unknown	1	2	28.3	4.64	YES
22907052	ARPC1A	actin-related protein 2/3 complex subunit 1A isoform 1	Cytoplasm	Cell growth and/or maintenance	Structural constituent of cytoskeleton	3	5	41.5	8.18	YES
23065544	GSTM1	glutathione S-transferase Mu 1 isoform 1	Cytoplasm	Energy pathways	Glutathione transferase activity	5	27	25.7	6.7	YES
23065552	GSTM3	glutathione S-transferase Mu 3	Cytoplasm	Metabolism	Glutathione transferase activity	16	77	26.5	5.54	YES
23097250	TIPRL	TIP41-like protein isoform 1	-	Biological_process unknown	Molecular function unknown	1	2	31.4	5.91	YES
23110925	PSMB6	proteasome subunit beta type-6 isoform 1	Cytoplasm	Protein metabolism	Ubiquitin-specific protease activity	1	4	25.3	4.92	YES
23110935	PSMA1	proteasome subunit alpha type-1 isoform 1	Nucleus	Protein metabolism	Peptidase activity	2	4	30.2	6.99	YES
23110942	PSMA5	proteasome subunit alpha type-5 isoform 1	Cytoplasm	Protein metabolism	Ubiquitin-specific protease activity	5	19	26.4	4.79	YES
23110944	PSMA6	proteasome subunit alpha type-6 isoform a	Cytoplasm	Protein metabolism	Ubiquitin-specific protease activity	6	20	27.4	6.76	YES
23200008	ABHD11	protein ABHD11 isoform 1	-	Biological_process unknown	Molecular function unknown	3	10	34.7	9.48	YES
23238222	COPS3	COP9 signalosome complex subunit 3 isoform 1	Cytoplasm	Cell communication	Transcription regulator activity	4	10	47.8	6.65	YES
23503295	CSNK2B	casein kinase II subunit beta isoform 1	Nucleus	Cell communication	Protein serine/threonine kinase activity	3	10	24.9	5.55	YES
23510381	TNPO1	transportin-1 isoform 2	Cytoplasm	Transport	Transporter activity	4	25	101.2	4.96	YES
23510451	APEH	acylamino-acid-releasing enzyme	Cytoplasm	Metabolism	Hydrolase activity	8	19	81.2	5.48	YES
24111250	GNA13	guanine nucleotide-binding protein subunit alpha-13 isoform 1	Plasma membrane	Cell communication	GTPase activity	4	50	44	8	YES
24234683	USP11	ubiquitin carboxyl-terminal hydrolase 11	Nucleus	Protein metabolism	Ubiquitin-specific protease activity	1	2	109.7	5.45	YES
24234688	HSPA9	stress-70 protein, mitochondrial	Cytoplasm	Protein metabolism	Chaperone activity	29	177	73.6	6.16	YES
24234699	KRT19	keratin, type I cytoskeletal 19	Cytoplasm	Cell growth and/or maintenance	Structural constituent of cytoskeleton	9	62	44.1	5.14	YES
24234747	ILF2	interleukin enhancer-binding factor 2 isoform 1	Nucleus	Regulation of nucleobase, nucleoside, nucleotide and nucleic acid metabolism	Transcription factor activity	9	30	43	5.26	YES
24307939	CCT5	T-complex protein 1 subunit epsilon isoform a	Centrosome	Protein metabolism	Chaperone activity	21	81	59.6	5.66	YES
24307949	NCDN	neurochondrin isoform 1	Cytoplasm	Biological_process unknown	Molecular function unknown	6	11	78.8	5.48	YES
24307965	UBXN4	UBX domain-containing protein 4	-	Biological_process unknown	Molecular function unknown	1	2	56.7	6.38	YES
24307999	GPD1L	glycerol-3-phosphate dehydrogenase 1-like protein	-	Biological_process unknown	Molecular function unknown	1	2	38.4	7.02	YES
24308007	ARL6IP1	ADP-ribosylation factor-like protein 6-interacting protein 1 isoform 1	Cytoplasm	Transport	Auxiliary transport protein activity	1	2	23.3	9.32	YES
24308039	UFL1	E3 UFM1-protein ligase 1	Mitochondrion	Biological_process unknown	Molecular function unknown	2	4	89.5	6.79	YES
24308071	CNRIP1	CB1 cannabinoid receptor-interacting protein 1 isoform CRIP1a	-	Biological_process unknown	Molecular function unknown	1	2	18.6	7.94	YES
24308127	DNAJC10	dnaJ homolog subfamily C member 10 isoform 1	Endoplasmic reticulum	Protein metabolism	Molecular function unknown	2	4	91	7.18	YES
24308201	APMAP	adipocyte plasma membrane-associated protein	-	Biological_process unknown	Molecular function unknown	7	25	46.5	6.16	YES
24308207	LRRC47	leucine-rich repeat-containing protein 47	Cytoplasm	Biological_process unknown	Molecular function unknown	8	25	63.4	8.28	YES
24308213	SERINC1	serine incorporator 1	Plasma membrane	Biological_process unknown	Protein binding	1	10	50.5	5.85	YES
24308257	VAT1L	synaptic vesicle membrane protein VAT-1 homolog-like	-	Biological_process unknown	Molecular function unknown	33	363	45.9	5.06	YES
24308273	ABRACL	costars family protein ABRACL	-	-	-	1	4	9.1	6.29	YES
24308279	NECAB1	N-terminal EF-hand calcium-binding protein 1	-	Cell communication	Calcium ion binding	1	2	40.5	4.88	YES
24308309	TMEM163	transmembrane protein 163	-	Biological_process unknown	Molecular function unknown	1	2	31.4	7.53	YES
24430151	PSMC1	26S protease regulatory subunit 4	Nucleus	Protein metabolism	Ubiquitin-specific protease activity	3	6	49.2	6.21	YES
24431933	RTN4	reticulon-4 isoform B	Endoplasmic reticulum membrane	Regulation of cell growth	Protein binding	1	24	40.3	4.78	YES
24431935	RTN4	reticulon-4 isoform A	Endoplasmic reticulum membrane	Regulation of cell growth	Protein binding	2	25	129.9	4.5	YES
24432106	CCAR2	cell cycle and apoptosis regulator protein 2	Nucleus	Signal transduction	Calcium ion binding	5	10	102.8	5.22	YES
24497435	PSMC5	26S protease regulatory subunit 8 isoform 1	Cytoplasm	Protein metabolism	Ubiquitin-specific protease activity	6	14	45.6	7.55	YES
24497605	NUP62	nuclear pore glycoprotein p62	Nuclear membrane	Transport	Transporter activity	1	2	53.2	5.31	YES
24638433	NCSTN	nicastrin isoform 1	Plasma membrane	Cell communication	Protein binding	3	10	78.4	5.99	YES
24638454	ATP2A2	sarcoplasmic/endoplasmic reticulum calcium ATPase 2 isoform b	Endoplasmic reticulum	Transport	Auxiliary transport protein activity	3	12	114.7	5.34	YES
24797086	IPO5	importin-5	Cytoplasm	Transport	Transporter activity	2	6	125.5	4.92	YES
24797097	PYCR1	pyrroline-5-carboxylate reductase 1, mitochondrial isoform 1	Cytoplasm	Metabolism	Oxidoreductase activity	1	1	33.3	7.61	YES
24850115	SIAE	sialate O-acetylesterase isoform 1	Cytoplasm	Metabolism	Hydrolase activity	3	10	58.3	7.33	YES
25777600	PSMD1	26S proteasome non-ATPase regulatory subunit 1 isoform 1	Cytoplasm	Protein metabolism	Ubiquitin-specific protease activity	3	24	105.8	5.39	YES
25777602	PSMD2	26S proteasome non-ATPase regulatory subunit 2 isoform 1	Cytoplasm	Protein metabolism	Ubiquitin-specific protease activity	12	34	100.1	5.2	YES
25777612	PSMD3	26S proteasome non-ATPase regulatory subunit 3	Cytoplasm	Protein metabolism	Ubiquitin-specific protease activity	13	41	60.9	8.44	YES
25777615	PSMD7	26S proteasome non-ATPase regulatory subunit 7	Nucleus	Protein metabolism	Ubiquitin-specific protease activity	2	4	37	6.77	YES
25777713	SKP1	S-phase kinase-associated protein 1 isoform b	Cytoplasm	Protein metabolism	Ubiquitin-specific protease activity	3	8	18.6	4.54	YES
25777721	ALDH5A1	succinate-semialdehyde dehydrogenase, mitochondrial isoform 1	Mitochondrion	Metabolism	Catalytic activity	9	36	58.6	8.09	YES
25777724	ALDH1A2	retinal dehydrogenase 2 isoform 1	Extracellular	Metabolism	Catalytic activity	1	15	56.7	6.05	YES
25777732	ALDH2	aldehyde dehydrogenase, mitochondrial isoform 1	Mitochondrion	Metabolism	Catalytic activity	21	131	56.3	7.05	YES
25777736	ALDH4A1	delta-1-pyrroline-5-carboxylate dehydrogenase, mitochondrial isoform a	Mitochondrion	Metabolism	Catalytic activity	4	12	61.7	8.07	YES
25952114	CAMK2A	calcium/calmodulin-dependent protein kinase type II subunit alpha isoform 1	Centrosome	Cell communication	Protein serine/threonine kinase activity	2	20	55.3	7.44	YES
26667177	MRPL46	39S ribosomal protein L46, mitochondrial	Mitochondrion	Protein metabolism	Structural constituent of ribosome	3	6	31.7	7.05	YES
27436946	LMNA	lamin isoform A	Nucleus	Cell growth and/or maintenance	Structural molecule activity	45	449	74.1	7.02	YES
27501446	DENR	density-regulated protein	Nucleus	Cell communication	Molecular function unknown	1	2	22.1	5.3	YES
27545315	TACO1	translational activator of cytochrome c oxidase 1	-	Biological_process unknown	Molecular function unknown	1	2	32.5	8.13	YES
27764867	SYP	synaptophysin	Nucleus	Transport	Transporter activity	3	30	33.8	4.81	YES
27804313	GAL	galanin peptides preproprotein	Secretory granule	Regulation of physiological process	Molecular function unknown	2	6	13.3	7.52	YES
27881482	DDX58	probable ATP-dependent RNA helicase DDX58	Cytoplasm	Regulation of nucleobase, nucleoside, nucleotide and nucleic acid metabolism	Molecular function unknown	1	2	106.5	6.4	YES
27883866	RIC8A	synembryn-A isoform 1	Cytoplasm	Cell communication	Guanyl-nucleotide exchange factor activity	3	10	60.3	5.33	YES
28178832	IDH2	isocitrate dehydrogenase [NADP], mitochondrial isoform 1	Mitochondrion	Metabolism	Catalytic activity	16	72	50.9	8.69	YES
28195384	NPTX2	neuronal pentraxin-2	Extracellular	Biological_process unknown	Calcium ion binding	1	6	47	5.63	YES
28302131	HBG1	hemoglobin subunit gamma-1	-	Transport	Transporter activity	1	46	16.1	7.2	YES
28827795	CHMP4B	charged multivesicular body protein 4b	Cytoplasm	Transport	Transporter activity	1	2	24.9	4.82	YES
28872725	PSMD11	26S proteasome non-ATPase regulatory subunit 11	Cytoplasm	Protein metabolism	Ubiquitin-specific protease activity	3	6	47.4	6.48	YES
29029559	CSE1L	exportin-2 isoform 1	Nucleus	Transport	Transporter activity	7	18	110.3	5.77	YES
29150261	IFI30	gamma-interferon-inducible lysosomal thiol reductase preproprotein	Lysosome	Metabolism	Catalytic activity	1	4	27.9	4.88	YES
29171702	PPA2	inorganic pyrophosphatase 2, mitochondrial isoform 1	Mitochondrion	Metabolism	Catalytic activity	4	14	37.9	7.39	YES
29568111	MYL9	myosin regulatory light polypeptide 9 isoform a	-	Muscle contraction	Molecular function unknown	3	10	19.8	4.92	YES
29788768	TUBB2B	tubulin beta-2B chain	-	Cell growth and/or maintenance	Structural constituent of cytoskeleton	2	2285	49.9	4.89	YES
29788785	TUBB	tubulin beta chain isoform b	Cytoplasm	Cell growth and/or maintenance	Structural constituent of cytoskeleton	7	2550	49.6	4.89	YES
29789409	NDUFAF2	mimitin, mitochondrial	Mitochondrion	Cell proliferation	Molecular function unknown	1	4	19.8	8.97	YES
29826294	GORASP2	Golgi reassembly-stacking protein 2 isoform 1	Golgi apparatus	Transport	Transporter activity	3	6	47.1	4.82	YES
30023820	FAM134C	protein FAM134C	-	Biological_process unknown	Molecular function unknown	1	2	51.4	4.97	YES
30089972	ACOX1	peroxisomal acyl-coenzyme A oxidase 1 isoform a	Peroxisome	Metabolism	Catalytic activity	1	2	74.6	7.62	YES
30410792	PSME2	proteasome activator complex subunit 2	Cytoplasm	Protein metabolism	Ubiquitin-specific protease activity	6	30	27.4	5.73	YES
30795180	ZFYVE1	zinc finger FYVE domain-containing protein 1 isoform 1	Cytoplasmic vesicle	Biological_process unknown	Lipid binding	2	4	87.1	7.42	YES
30795225	CEND1	cell cycle exit and neuronal differentiation protein 1	Mitochondrion	Cell growth and/or maintenance	Molecular function unknown	3	10	14.9	9.2	YES
30795227	DTD1	D-tyrosyl-tRNA(Tyr) deacylase 1 isoform 2	Nucleus	Metabolism	ATPase activity	1	2	23.4	8.24	YES
30795231	BASP1	brain acid soluble protein 1	Nucleus	Regulation of nucleobase, nucleoside, nucleotide and nucleic acid metabolism	Transcription regulator activity	14	119	22.7	4.63	YES
31317224	EDIL3	EGF-like repeat and discoidin I-like domain-containing protein 3 isoform 1	Extracellular	Cell growth and/or maintenance	Extracellular matrix structural constituent	2	4	53.7	7.28	YES
31377697	COLGALT1	procollagen galactosyltransferase 1	-	Biological_process unknown	Molecular function unknown	1	2	71.6	7.31	YES
31542718	ECHDC3	enoyl-CoA hydratase domain-containing protein 3, mitochondrial	-	Metabolism	Molecular function unknown	1	2	32.7	8.65	YES
31542723	SPATA20	spermatogenesis-associated protein 20 isoform 1	-	Reproduction	Molecular function unknown	1	2	89.7	7.81	YES
31542947	HSPD1	60 kDa heat shock protein, mitochondrial	Mitochondrion	Protein folding	Heat shock protein activity	36	262	61	5.87	YES
31542984	ITIH4	inter-alpha-trypsin inhibitor heavy chain H4 isoform 1	Extracellular	Protein metabolism	Protease inhibitor activity	2	4	103.3	6.98	YES
31543106	BCAM	basal cell adhesion molecule isoform 1	Plasma membrane	Cell adhesion	Cell adhesion molecule activity	11	32	67.4	5.81	YES
31543380	PARK7	protein deglycase DJ-1	Cytoplasm	Regulation of nucleobase, nucleoside, nucleotide and nucleic acid metabolism	RNA binding	13	58	19.9	6.79	YES
31543806	THBS4	thrombospondin-4 isoform a	Extracellular	Cell growth and/or maintenance	Extracellular matrix structural constituent	1	2	105.8	4.68	YES
31621303	SFXN3	sideroflexin-3	Integral to membrane	Biological_process unknown	Molecular function unknown	1	2	36	9.09	YES
31621305	LRPPRC	leucine-rich PPR motif-containing protein, mitochondrial	Nucleus	Regulation of nucleobase, nucleoside, nucleotide and nucleic acid metabolism	RNA binding	9	24	157.8	6.13	YES
31652249	LBP	lipopolysaccharide-binding protein	Extracellular	Immune response	Polysaccharide binding	1	2	53.4	6.7	YES
31657129	PFAS	phosphoribosylformylglycinamidine synthase	Cytoplasm	Metabolism	Ligase activity	1	2	144.6	5.76	YES
31657142	ITGA1	integrin alpha-1	Plasma membrane	Cell communication	Receptor activity	2	4	130.8	6.29	YES
31711992	DLAT	dihydrolipoyllysine-residue acetyltransferase component of pyruvate dehydrogenase complex, mitochondrial	Mitochondrion	Metabolism	Acyltransferase activity	13	48	69	7.84	YES
32189392	PRDX2	peroxiredoxin-2	Cytoplasm	Metabolism	Peroxidase activity	12	64	21.9	5.97	YES
32189394	ATP5B	ATP synthase subunit beta, mitochondrial	Mitochondrion	Metabolism	Transporter activity	31	1055	56.5	5.4	YES
32307148	OGT	UDP-N-acetylglucosamine--peptide N-acetylglucosaminyltransferase 110 kDa subunit isoform 1	Nucleus	Protein metabolism	Transferase activity	4	10	116.9	6.7	YES
32307161	CUL1	cullin-1	Nucleus	Protein metabolism	Ubiquitin-specific protease activity	2	4	89.6	8	YES
32307172	DPT	dermatopontin	Extracellular	Cell growth and/or maintenance	Extracellular matrix structural constituent	3	12	24	4.82	YES
32454741	SERPINH1	serpin H1	Endoplasmic reticulum	Protein metabolism	Heat shock protein activity	4	10	46.4	8.69	YES
32483416	NEFH	neurofilament heavy polypeptide	Cytoplasm	Cell growth and/or maintenance	Structural molecule activity	9	174	111.8	6.11	YES
32484975	ADK	adenosine kinase isoform b	Cytoplasm	Regulation of nucleobase, nucleoside, nucleotide and nucleic acid metabolism	Catalytic activity	1	2	40.5	6.7	YES
32528282	ACOT7	cytosolic acyl coenzyme A thioester hydrolase isoform hBACHb	Cytoplasm	Lipid metabolism	Hydrolase activity	8	34	41.8	8.54	YES
33286418	PKM	pyruvate kinase PKM isoform a	-	-	-	4	580	57.9	7.84	YES
33286422	PKM	pyruvate kinase PKM isoform b	-	-	-	4	561	58	7.71	YES
33350932	DYNC1H1	cytoplasmic dynein 1 heavy chain 1	Cytoplasm	Metabolism	ATPase activity	104	521	532.1	6.4	YES
33457316	PLEKHO2	pleckstrin homology domain-containing family O member 2 isoform 1	-	Biological_process unknown	Molecular function unknown	1	2	53.3	5.43	YES
33457348	MYDGF	myeloid-derived growth factor	-	Cell communication	Growth factor activity	1	2	18.8	6.68	YES
33469951	RABGGTA	geranylgeranyl transferase type-2 subunit alpha	Cytoplasm	Protein modification	Transferase activity	1	2	65	5.67	YES
33469966	SCFD1	sec1 family domain-containing protein 1 isoform a	Plasma membrane	Transport	Auxiliary transport protein activity	6	12	72.3	6.27	YES
33620747	MYEF2	myelin expression factor 2 isoform a	Nucleus	Regulation of nucleobase, nucleoside, nucleotide and nucleic acid metabolism	Transcription regulator activity	2	3	64.1	8.87	YES
33636738	PRKACB	cAMP-dependent protein kinase catalytic subunit beta isoform 1	Cytoplasm	Cell communication	Protein serine/threonine kinase activity	2	9	46.2	8.69	YES
33946324	GNAI1	guanine nucleotide-binding protein G(i) subunit alpha-1 isoform 1	Plasma membrane	Cell communication	GTPase activity	5	102	40.3	5.97	YES
33946329	RALA	ras-related protein Ral-A	Plasma membrane	Cell communication	GTPase activity	2	4	23.6	7.11	YES
34098946	YBX1	nuclease-sensitive element-binding protein 1	Cytoplasm	Regulation of nucleobase, nucleoside, nucleotide and nucleic acid metabolism	Transcription factor activity	2	4	35.9	9.88	YES
34101288	CPSF2	cleavage and polyadenylation specificity factor subunit 2 isoform 1	Nucleus	Regulation of nucleobase, nucleoside, nucleotide and nucleic acid metabolism	RNA binding	1	2	88.4	5.11	YES
34147513	RAB7A	ras-related protein Rab-7a	Endosome	Cell communication	GTPase activity	5	14	23.5	6.7	YES
34147630	TUFM	elongation factor Tu, mitochondrial	Mitochondrion	Protein metabolism	Translation regulator activity	11	63	49.8	7.61	YES
34335134	SEC13	protein SEC13 homolog isoform 1	Endoplasmic reticulum	Transport	Transporter activity	1	3	35.5	5.48	YES
34335270	PRNP	major prion protein preproprotein	Plasma membrane	Metabolism	Molecular function unknown	1	8	27.6	9	YES
34452732	PREX1	phosphatidylinositol 3,4,5-trisphosphate-dependent Rac exchanger 1 protein	Cytoplasm	Cell communication	Guanyl-nucleotide exchange factor activity	3	6	186.1	6.38	YES
34485722	KPNA3	importin subunit alpha-4	Nucleus	Transport	Transporter activity	1	1	57.8	4.94	YES
34734062	FBLN1	fibulin-1 isoform C	Extracellular	Cell growth and/or maintenance	Extracellular matrix structural constituent	1	6	74.4	5.29	YES
34734066	FBLN1	fibulin-1 isoform D	Extracellular	Cell growth and/or maintenance	Extracellular matrix structural constituent	1	6	77.2	5.26	YES
34740329	HNRNPA3	heterogeneous nuclear ribonucleoprotein A3	Nucleus	Regulation of nucleobase, nucleoside, nucleotide and nucleic acid metabolism	RNA binding	13	56	39.6	9.01	YES
37594464	NUDT5	ADP-sugar pyrophosphatase isoform 1	-	Metabolism	Hydrolase activity	1	2	24.3	4.94	YES
37694062	AQP1	aquaporin-1 isoform 1	Plasma membrane	Transport	Water channel activity	1	2	28.5	7.42	YES
38016911	STOM	erythrocyte band 7 integral membrane protein isoform a	Cytoplasm	Cell communication	Channel regulator activity	2	4	31.7	7.88	YES
38016914	SAMHD1	deoxynucleoside triphosphate triphosphohydrolase SAMHD1	Nucleus	Immune response	GTPase activity	18	49	72.2	7.14	YES
38045942	UBA3	NEDD8-activating enzyme E1 catalytic subunit isoform 1	Nucleus	Protein metabolism	Ubiquitin-specific protease activity	1	4	51.8	5.45	YES
38149981	SNRPB2	U2 small nuclear ribonucleoprotein B''	Nucleus	RNA metabolism	RNA binding	1	4	25.5	9.72	YES
38150007	SNRPB	small nuclear ribonucleoprotein-associated proteins B and B' isoform B'	Cytoplasm	Regulation of nucleobase, nucleoside, nucleotide and nucleic acid metabolism	RNA binding	4	14	24.6	11.19	YES
38176300	NES	nestin	Cytoplasm	Cell growth and/or maintenance	Structural constituent of cytoskeleton	8	30	177.3	4.36	YES
38201714	ELAVL1	ELAV-like protein 1	Cytoplasm	Regulation of nucleobase, nucleoside, nucleotide and nucleic acid metabolism	RNA binding	1	2	36.1	9.17	YES
38202207	MAOB	amine oxidase [flavin-containing] B	Mitochondrion	Metabolism	Catalytic activity	7	33	58.7	7.5	YES
38202257	GANAB	neutral alpha-glucosidase AB isoform 2	Endoplasmic reticulum	Carbohydrate metabolism	Hydrolase activity	27	97	106.8	6.14	YES
38327029	UBE4A	ubiquitin conjugation factor E4 A isoform 1	-	Protein metabolism	Ubiquitin-specific protease activity	1	2	123.4	5.24	YES
38327039	HSPA4	heat shock 70 kDa protein 4	Golgi apparatus	Protein metabolism	Chaperone activity	22	76	94.3	5.19	YES
38327625	CS	citrate synthase, mitochondrial	Mitochondrial matrix	Metabolism	Acyltransferase activity	20	93	51.7	8.32	YES
38372919	BSG	basigin isoform 1	Plasma membrane	Cell communication	Receptor activity	2	4	42.2	5.66	YES
38455427	CCT4	T-complex protein 1 subunit delta isoform a	Cytoplasm	Protein metabolism	Chaperone activity	16	66	57.9	7.83	YES
38570142	MPP5	MAGUK p55 subfamily member 5 isoform 1	Plasma membrane	Cell communication	Molecular function unknown	1	4	77.2	6.14	YES
39725934	SERPINF1	pigment epithelium-derived factor	Extracellular	Cell communication	Serine-type peptidase activity	3	9	46.3	6.38	YES
39930541	C9orf142	protein PAXX	Nucleus	Biological_process unknown	Molecular function unknown	2	6	21.6	5.48	YES
39995109	GM2A	ganglioside GM2 activator isoform 1	Lysosome	Metabolism	Transporter activity	1	2	20.8	5.31	YES
40018633	IDI1	isopentenyl-diphosphate Delta-isomerase 1 isoform a	Peroxisome	Metabolism	Isomerase activity	4	7	32.5	7.88	YES
40068485	VWA1	von Willebrand factor A domain-containing protein 1 isoform 1	Extracellular	Extracellular structure organization and biogenesis	Extracellular matrix structural constituent	4	9	46.8	7.68	YES
40068518	PGD	6-phosphogluconate dehydrogenase, decarboxylating isoform 1	Cytoplasm	Metabolism	Catalytic activity	5	23	53.1	7.23	YES
40217847	SNRNP200	U5 small nuclear ribonucleoprotein 200 kDa helicase	Nucleus	Regulation of nucleobase, nucleoside, nucleotide and nucleic acid metabolism	Ribonucleoprotein	2	6	244.4	6.06	YES
40254446	CUL5	cullin-5	Plasma membrane	Protein metabolism	Ubiquitin-specific protease activity	2	4	90.9	7.94	YES
40254462	GNAQ	guanine nucleotide-binding protein G(q) subunit alpha	Plasma membrane	Cell communication	GTPase activity	4	29	42.1	5.68	YES
40254947	TMX4	thioredoxin-related transmembrane protein 4	-	Cell motility	Molecular function unknown	1	2	38.9	4.37	YES
40254986	HSDL2	hydroxysteroid dehydrogenase-like protein 2 isoform 1	-	Biological_process unknown	Molecular function unknown	2	6	45.4	7.99	YES
40316910	SAA1	serum amyloid A-1 protein preproprotein	Extracellular	Lipid transport	Transporter activity	3	10	13.5	6.79	YES
40316915	RNPEP	aminopeptidase B isoform a	Golgi apparatus	Protein metabolism	Aminopeptidase activity	7	18	72.5	5.74	YES
40317626	THBS1	thrombospondin-1	Extracellular	Cell growth and/or maintenance	Extracellular matrix structural constituent	7	18	129.3	4.94	YES
40354195	KRT18	keratin, type I cytoskeletal 18	Cytoplasm	Cell growth and/or maintenance	Structural constituent of cytoskeleton	9	43	48	5.45	YES
40789249	DARS2	aspartate--tRNA ligase, mitochondrial	Mitochondrion	Biological_process unknown	Molecular function unknown	1	2	73.5	8.02	YES
40805823	COL22A1	collagen alpha-1(XXII) chain	-	Cell growth and/or maintenance	Extracellular matrix structural constituent	1	1	161	7.23	YES
40805864	TPD52L2	tumor protein D54 isoform a	-	Biological_process unknown	Molecular function unknown	3	12	24.8	6.42	YES
40807485	PRPF6	pre-mRNA-processing factor 6	Nucleus	Cell communication	Receptor signaling complex scaffold activity	1	2	106.9	8.25	YES
41281453	SLK	STE20-like serine/threonine-protein kinase isoform 1	Cytoplasm	Cell communication	Protein serine/threonine kinase activity	1	2	142.6	5.15	YES
41281564	WDR37	WD repeat-containing protein 37	-	Biological_process unknown	Molecular function unknown	3	6	54.6	7.23	YES
41281768	CYB5A	cytochrome b5 isoform 1	Mitochondrion	Metabolism	Oxidoreductase activity	1	4	15.3	4.96	YES
41327712	CRK	adapter molecule crk isoform a	Cytoplasm	Cell communication	Receptor signaling complex scaffold activity	3	6	33.8	5.55	YES
41327741	ETHE1	persulfide dioxygenase ETHE1, mitochondrial isoform 1	Mitochondrion	Metabolism	Molecular function unknown	4	10	27.9	6.83	YES
41327764	AKR7A2	aflatoxin B1 aldehyde reductase member 2 isoform 1	Cytoplasm	Metabolism	Catalytic activity	2	4	39.6	7.17	YES
41327781	NDUFAF3	NADH dehydrogenase [ubiquinone] 1 alpha subcomplex assembly factor 3 isoform a	-	Biological_process unknown	Molecular function unknown	1	2	20.3	8.22	YES
41349456	PREP	prolyl endopeptidase	Cytoplasm	Protein metabolism	Serine-type peptidase activity	14	54	80.6	5.86	YES
41350333	TBCD	tubulin-specific chaperone D	Microtubule	Protein folding	Chaperone activity	1	6	132.5	6.19	YES
41393561	LAP3	cytosol aminopeptidase	Cytoplasm	Protein metabolism	Aminopeptidase activity	16	38	56.1	7.93	YES
41406084	GPX1	glutathione peroxidase 1 isoform 1	Cytoplasm	Anti-apoptosis	Peroxidase activity	1	4	22.1	6.55	YES
41872631	FASN	fatty acid synthase	Cytoplasm	Metabolism	Catalytic activity	22	72	273.3	6.44	YES
42544144	GIPC1	PDZ domain-containing protein GIPC1 isoform 1	Cytoplasmic vesicle membrane	Signal transduction	Binding	1	2	36	6.28	YES
42716275	CNOT1	CCR4-NOT transcription complex subunit 1 isoform a	Nucleus	Transcription	Transcription regulator activity	1	2	266.8	7.11	YES
42741648	SEP15	15 kDa selenoprotein isoform 1	Endoplasmic reticulum	Protein folding	Protein binding	1	2	18.1	5.03	YES
42794771	TXNDC5	thioredoxin domain-containing protein 5 isoform 1	Endoplasmic reticulum	Protein metabolism	Oxidoreductase activity	6	14	47.6	5.97	YES
42822880	MBLAC2	metallo-beta-lactamase domain-containing protein 2	-	Biological_process unknown	Molecular function unknown	1	2	31.3	6.92	YES
45387945	ESYT2	extended synaptotagmin-2	Mitochondrion	Biological_process unknown	Molecular function unknown	1	3	98.8	8.68	YES
45439306	DARS	aspartate--tRNA ligase, cytoplasmic isoform 1	Cytoplasm	Metabolism	ATPase activity	8	28	57.1	6.55	YES
45446749	KIF5A	kinesin heavy chain isoform 5A	Plasma membrane	Transport	Motor activity	4	24	117.3	5.9	YES
45545411	NCKAP1	nck-associated protein 1 isoform 2	Cytoplasm	Cell communication	Protein binding	4	17	129.4	6.68	YES
45580688	C7	complement component C7	Extracellular	Immune response	Complement activity	1	2	93.5	6.48	YES
45827776	RTN1	reticulon-1 isoform C	Endoplasmic reticulum	Cell communication	Signal transducer activity	3	16	23.6	8.91	YES
45827806	ATL3	atlastin-3 isoform 1	Mitochondrion	Immune response	Molecular function unknown	1	2	60.5	5.66	YES
46276893	TCEB2	transcription elongation factor B polypeptide 2 isoform b	Nucleus	Regulation of nucleobase, nucleoside, nucleotide and nucleic acid metabolism	Transcription regulator activity	1	4	17.9	6.1	YES
46367787	PABPC1	polyadenylate-binding protein 1	Cytoplasm	Regulation of nucleobase, nucleoside, nucleotide and nucleic acid metabolism	RNA binding	7	18	70.6	9.5	YES
46593007	UQCRC1	cytochrome b-c1 complex subunit 1, mitochondrial	Mitochondrion	Metabolism	Catalytic activity	12	72	52.6	6.37	YES
46852147	IARS2	isoleucine--tRNA ligase, mitochondrial	Mitochondrion	Metabolism	TRNA ligase activity	8	20	113.7	7.2	YES
47078292	ITGB3	integrin beta-3	Plasma membrane	Cell communication	Receptor activity	2	4	87	5.24	YES
47132583	PRKAR1A	cAMP-dependent protein kinase type I-alpha regulatory subunit isoform a	Cytoplasm	Cell communication	Protein serine/threonine kinase activity	2	6	43	5.35	YES
47132585	PRKAR2B	cAMP-dependent protein kinase type II-beta regulatory subunit	Nucleus	Cell communication	Protein serine/threonine kinase activity	4	20	46.3	4.92	YES
47132620	KRT2	keratin, type II cytoskeletal 2 epidermal	Cytoplasm	Cell growth and/or maintenance	Cytoskeletal protein binding	18	241	65.4	8	YES
47132622	MTAP	S-methyl-5'-thioadenosine phosphorylase	Cytoplasm	Metabolism	Phosphorylase activity	3	10	31.2	7.18	YES
47155554	NPEPL1	probable aminopeptidase NPEPL1 isoform 1	-	Protein metabolism	Aminopeptidase activity	1	6	55.8	6.87	YES
47271443	SRSF2	serine/arginine-rich splicing factor 2	Nucleus	Regulation of nucleobase, nucleoside, nucleotide and nucleic acid metabolism	Ribonucleoprotein	1	2	25.5	11.85	YES
47519616	TPM2	tropomyosin beta chain isoform Tpm2.1sm/cy	Cytoskeleton	Cell growth and/or maintenance	Structural constituent of cytoskeleton	1	29	33	4.67	YES
47717102	ATP6V1H	V-type proton ATPase subunit H isoform 1	-	Transport	ATPase activity	10	44	55.8	6.48	YES
47933379	NAPA	alpha-soluble NSF attachment protein	Golgi apparatus	Transport	Receptor signaling complex scaffold activity	2	10	33.2	5.36	YES
48255957	ATP2B4	plasma membrane calcium-transporting ATPase 4 isoform 4b	Plasma membrane	Transport	ATPase activity	4	34	133.8	6.42	YES
48255966	UGP2	UTP--glucose-1-phosphate uridylyltransferase isoform a	-	Metabolism	Nucleotidyltransferase activity	6	24	56.9	8.15	YES
48526509	TIMM50	mitochondrial import inner membrane translocase subunit TIM50	Mitochondrion	Cell communication	Protein tyrosine/serine/threonine phosphatase activity	1	2	50.4	9.42	YES
48762920	PFKL	ATP-dependent 6-phosphofructokinase, liver type isoform b	Cytoplasm	Metabolism	Catalytic activity	10	55	85	7.5	YES
48762932	CCT8	T-complex protein 1 subunit theta isoform 1	Cytoplasm	Protein metabolism	Chaperone activity	17	56	59.6	5.6	YES
48762934	COL1A2	collagen alpha-2(I) chain	Extracellular	Cell growth and/or maintenance	Extracellular matrix structural constituent	3	13	129.2	8.95	YES
48928056	HSPA13	heat shock 70 kDa protein 13	Endoplasmic reticulum	Protein metabolism	Chaperone activity	2	4	51.9	5.76	YES
49355721	FAM162A	protein FAM162A	-	Biological_process unknown	Molecular function unknown	1	2	17.3	9.77	YES
49472822	EIF3G	eukaryotic translation initiation factor 3 subunit G	Cytoplasm	Protein metabolism	Translation regulator activity	1	2	35.6	6.13	YES
49574491	ATP1B2	sodium/potassium-transporting ATPase subunit beta-2 isoform 1	Plasma membrane	Transport	ATPase activity	2	8	33.3	8.31	YES
49574502	CYB5R1	NADH-cytochrome b5 reductase 1	Endoplasmic reticulum	Metabolism	Catalytic activity	3	8	34.1	9.38	YES
50263048	GPM6B	neuronal membrane glycoprotein M6-b isoform 1	Plasma membrane	Biological_process unknown	Molecular function unknown	1	2	36.2	6.09	YES
50301238	GSR	glutathione reductase, mitochondrial isoform 1	Cytoplasm	Metabolism	Catalytic activity	7	24	56.2	8.5	YES
50345984	ATP5A1	ATP synthase subunit alpha, mitochondrial isoform a	Mitochondrion	Metabolism	Transporter activity	38	824	59.7	9.13	YES
50345988	ATP5C1	ATP synthase subunit gamma, mitochondrial isoform L (liver)	Mitochondrion	Metabolism	Transporter activity	8	30	33	9.22	YES
50345991	ATP5D	ATP synthase subunit delta, mitochondrial	Mitochondrial membrane	Ion transport	ATPase activity	2	4	17.5	5.49	YES
50428925	TBCB	tubulin-folding cofactor B isoform 1	Cytoplasm	Protein metabolism	Chaperone activity	2	6	27.3	5.15	YES
50428938	ASNA1	ATPase ASNA1	Cytoplasm	Metabolism	ATPase activity	7	21	38.8	4.91	YES
50592988	UQCRC2	cytochrome b-c1 complex subunit 2, mitochondrial	Mitochondrion	Metabolism	Catalytic activity	14	76	48.4	8.63	YES
50592994	TXN	thioredoxin isoform 1	Cytoplasm	Metabolism	Catalytic activity	2	6	11.7	4.92	YES
50592996	TUBB3	tubulin beta-3 chain isoform 1	Cytoplasm	Cell growth and/or maintenance	Structural molecule activity	14	1806	50.4	4.93	YES
50659080	SERPINA3	alpha-1-antichymotrypsin	Extracellular	Protein metabolism	Protease inhibitor activity	7	18	47.6	5.52	YES
51479156	ATP5L	ATP synthase subunit g, mitochondrial	Mitochondrion	Metabolism	ATPase activity	1	2	11.4	9.64	YES
51479192	RING1	E3 ubiquitin-protein ligase RING1	Nucleus	Regulation of nucleobase, nucleoside, nucleotide and nucleic acid metabolism	Transcription regulator activity	1	2	42.4	5.62	YES
51558759	ALAD	delta-aminolevulinic acid dehydratase isoform a	Cytoplasm	Metabolism	Hydro-lyase activity	2	4	39	7.65	YES
51702526	WASL	neural Wiskott-Aldrich syndrome protein	Cytoplasm	Cell growth and/or maintenance	Cytoskeletal protein binding	2	3	54.8	7.93	YES
52486265	PNMA1	paraneoplastic antigen Ma1	Cytoplasm	Immune response	Molecular function unknown	1	2	39.7	4.83	YES
52487191	ERP44	endoplasmic reticulum resident protein 44	Endoplasmic reticulum	Protein metabolism	Molecular function unknown	2	12	46.9	5.26	YES
52627149	TERF2IP	telomeric repeat-binding factor 2-interacting protein 1	Nucleus	Chromosome organization and biogenesis	DNA binding	1	1	44.2	4.73	YES
52632383	HNRNPL	heterogeneous nuclear ribonucleoprotein L isoform a	Nucleolus	Regulation of nucleobase, nucleoside, nucleotide and nucleic acid metabolism	RNA binding	10	26	64.1	8.22	YES
53729339	MTIF2	translation initiation factor IF-2, mitochondrial isoform a	Mitochondrion	Protein metabolism	Translation regulator activity	1	2	81.3	7.15	YES
53729361	LRSAM1	E3 ubiquitin-protein ligase LRSAM1 isoform 1	Cytoplasm	Cell communication	Ubiquitin-specific protease activity	2	4	83.5	5.94	YES
53759103	IPO8	importin-8 isoform 1	Nucleus	Transport	Transporter activity	1	4	119.9	5.16	YES
53829374	PKP4	plakophilin-4 isoform a	Plasma membrane	Cell growth and/or maintenance	Cell adhesion molecule activity	1	2	131.8	8.94	YES
53832003	AK4	adenylate kinase 4, mitochondrial	-	-	-	6	20	25.3	8.4	YES
54112121	SF3B3	splicing factor 3B subunit 3	Nucleus	Regulation of nucleobase, nucleoside, nucleotide and nucleic acid metabolism	Ribonucleoprotein	1	4	135.5	5.26	YES
54112390	CACNA2D1	voltage-dependent calcium channel subunit alpha-2/delta-1 preproprotein	Plasma membrane	Transport	Voltage-gated ion channel activity	10	29	123.1	5.25	YES
54607120	LTF	lactotransferrin isoform 1 preproprotein	Secretory granule	Transport	Transporter activity	14	60	78.1	8.12	YES
54633312	GLG1	Golgi apparatus protein 1 isoform 1	Golgi apparatus	Biological_process unknown	Receptor binding	2	4	137.1	6.9	YES
54873613	AGRN	agrin isoform 2	Extracellular	Cell growth and/or maintenance	Extracellular matrix structural constituent	18	63	214.7	6.4	YES
54873624	EIF2A	eukaryotic translation initiation factor 2A isoform 1	Cytoplasm	Protein metabolism	Translation regulator activity	2	4	64.9	8.87	YES
55743098	COL6A3	collagen alpha-3(VI) chain isoform 1	Extracellular	Cell growth and/or maintenance	Extracellular matrix structural constituent	1	575	343.5	6.68	YES
55743122	RBP4	retinol-binding protein 4 isoform a	Extracellular	Transport	Transporter activity	3	8	23	6.07	YES
55749577	SLC25A4	ADP/ATP translocase 1	Mitochondrion	Transport	Transporter activity	6	196	33	9.76	YES
55770836	SCCPDH	saccharopine dehydrogenase-like oxidoreductase	Mitochondrion	Biological_process unknown	Molecular function unknown	8	24	47.1	9.14	YES
55770840	CLCN3	H(+)/Cl(-) exchange transporter 3 isoform e	Plasma membrane	Transport	Voltage-gated ion channel activity	1	2	96.7	6.07	YES
55956788	NCL	nucleolin	Nucleolus	Regulation of nucleobase, nucleoside, nucleotide and nucleic acid metabolism	RNA binding	11	65	76.6	4.7	YES
55956899	KRT9	keratin, type I cytoskeletal 9	Cytoplasm	Cell growth and/or maintenance	Structural molecule activity	14	114	62	5.24	YES
55956919	HNRNPAB	heterogeneous nuclear ribonucleoprotein A/B isoform a	Nucleolus	Regulation of nucleobase, nucleoside, nucleotide and nucleic acid metabolism	MRNA binding	1	6	35.9	6.95	YES
56549107	OPTN	optineurin	Perinuclear region	Regulation of nucleobase, nucleoside, nucleotide and nucleic acid metabolism	Transcription regulator activity	5	18	65.9	5.17	YES
56549123	DNM2	dynamin-2 isoform 2	Cytoskeleton	Cell communication	GTPase activity	12	86	97.9	7.46	YES
56549129	MXRA7	matrix-remodeling-associated protein 7 isoform 3	-	Biological_process unknown	Molecular function unknown	2	6	17.5	4.15	YES
56549135	TAGLN3	transgelin-3	Cytoplasm	Biological_process unknown	Molecular function unknown	2	4	22.5	7.33	YES
56676375	TPPP3	tubulin polymerization-promoting protein family member 3	-	Biological_process unknown	Molecular function unknown	3	6	19	9.13	YES
56682959	FTH1	ferritin heavy chain	Cytoplasm	Transport	Storage protein	4	16	21.2	5.55	YES
56699409	RBMX	RNA-binding motif protein, X chromosome isoform 1	Nucleus	Regulation of nucleobase, nucleoside, nucleotide and nucleic acid metabolism	RNA binding	1	2	42.3	10.05	YES
56786155	C1QC	complement C1q subcomponent subunit C	Extracellular	Immune response	Complement activity	1	2	25.8	8.41	YES
57164942	CKAP5	cytoskeleton-associated protein 5 isoform a	Centrosome	Mitosis	Cytoskeletal protein binding	2	3	225.4	7.8	YES
57863257	TCP1	T-complex protein 1 subunit alpha isoform a	Cytoplasm	Protein metabolism	Chaperone activity	18	62	60.3	6.11	YES
58197556	IBA57	putative transferase CAF17, mitochondrial isoform 1	-	Biological_process unknown	Molecular function unknown	1	2	38.1	9.83	YES
58219014	SLC6A17	sodium-dependent neutral amino acid transporter SLC6A17	Integral to membrane	Transport	Auxiliary transport protein activity	1	2	80.9	5.99	YES
58761500	OLA1	obg-like ATPase 1 isoform 1	Nucleolus	Biological_process unknown	Molecular function unknown	3	10	44.7	7.81	YES
60499025	FECH	ferrochelatase, mitochondrial isoform a	Cytoplasm	Metabolism	Ligase activity	4	12	48.6	8.72	YES
61175239	TCEAL5	transcription elongation factor A protein-like 5	Nucleus	Regulation of nucleobase, nucleoside, nucleotide and nucleic acid metabolism	Transcription regulator activity	1	2	23.3	4.81	YES
61743952	AGPAT5	1-acyl-sn-glycerol-3-phosphate acyltransferase epsilon	Integral to membrane	Metabolism	Transferase activity	1	2	42	9.1	YES
61744477	SLC3A2	4F2 cell-surface antigen heavy chain isoform b	Plasma membrane	Transport	Auxiliary transport protein activity	5	16	68.1	5.05	YES
62198232	HMGCL	hydroxymethylglutaryl-CoA lyase, mitochondrial isoform 1	Mitochondrion	Metabolism	Lyase activity	2	10	34.3	8.54	YES
62198241	CUTA	protein CutA isoform 1	Plasma membrane	Biological_process unknown	Molecular function unknown	2	8	20.9	5.48	YES
62240992	CARS	cysteine--tRNA ligase, cytoplasmic isoform c	Cytoplasm	Metabolism	Ligase activity	3	12	94.6	6.83	YES
62241042	EPRS	bifunctional glutamate/proline--tRNA ligase	Cytoplasm	Protein metabolism	Ligase activity	4	8	170.5	7.33	YES
62414289	VIM	vimentin	Intermediate filament	Cell growth and/or maintenance	Structural constituent of cytoskeleton	57	2817	53.6	5.12	YES
62422571	CRMP1	dihydropyrimidinase-related protein 1 isoform 1	Cytoplasm	Cell growth and/or maintenance	Protein binding	19	124	74.2	6.86	YES
62530384	ECI1	enoyl-CoA delta isomerase 1, mitochondrial isoform 1	Mitochondrion	Metabolism	Isomerase activity	7	28	32.8	8.54	YES
62548856	BAG5	BAG family molecular chaperone regulator 5 isoform a	-	Biological_process unknown	Molecular function unknown	1	2	56	6	YES
62548860	MATN2	matrilin-2 isoform a	Extracellular matrix	Cell growth and/or maintenance	Extracellular matrix structural constituent	2	6	106.8	6.27	YES
62739186	CFH	complement factor H isoform a	Extracellular	Immune response	Complement binding	7	18	139	6.62	YES
63003905	PPM1L	protein phosphatase 1L isoform 1	-	Cell communication	Protein serine/threonine phosphatase activity	1	2	41	5.87	YES
63055043	TMEM205	transmembrane protein 205	Integral to membrane	Biological_process unknown	Molecular function unknown	1	2	21.2	8.62	YES
63055049	PGM2	phosphoglucomutase-2	-	Metabolism	Catalytic activity	9	22	68.2	6.73	YES
63055057	ACTBL2	beta-actin-like protein 2	-	Biological_process unknown	Molecular function unknown	5	188	42	5.59	YES
63162572	CCT3	T-complex protein 1 subunit gamma isoform a	Cytoplasm	Protein metabolism	Chaperone activity	27	112	60.5	6.49	YES
65301139	ATP9A	probable phospholipid-transporting ATPase IIA	-	Regulation of enzyme activity	ATPase activity	5	16	118.5	7.77	YES
65506442	PCCA	propionyl-CoA carboxylase alpha chain, mitochondrial isoform a	Mitochondrion	Metabolism	Ligase activity	5	16	80	7.52	YES
66277202	PODXL	podocalyxin isoform 1	Integral to membrane	Cell adhesion	Molecular function unknown	2	4	58.6	5.49	YES
66346679	SERBP1	plasminogen activator inhibitor 1 RNA-binding protein isoform 1	Cytoplasm	Regulation of nucleobase, nucleoside, nucleotide and nucleic acid metabolism	RNA binding	1	2	44.9	8.65	YES
66346706	NEGR1	neuronal growth regulator 1	-	Biological_process unknown	Molecular function unknown	2	4	38.7	6.21	YES
66347828	VPS13C	vacuolar protein sorting-associated protein 13C isoform 2A	-	Biological_process unknown	Molecular function unknown	5	10	422.1	6.83	YES
66348062	FAHD1	acylpyruvase FAHD1, mitochondrial isoform 1	-	Biological_process unknown	Molecular function unknown	3	14	27.1	7.69	YES
66528995	FSHB	follitropin subunit beta	Extracellular	Cell communication	Peptide hormone	1	2	14.7	7.06	YES
66529294	PON2	serum paraoxonase/arylesterase 2 isoform 1	Plasma membrane	Lipid metabolism	Antioxidant activity	2	6	39.4	5.6	YES
66932916	MAPK1	mitogen-activated protein kinase 1	Cytoplasm	Cell communication	Protein serine/threonine kinase activity	13	51	41.4	6.98	YES
67089149	PML	protein PML isoform 1	Nucleus	Regulation of gene expression, epigenetic	Transcription regulator activity	1	2	97.5	6.21	YES
67782307	SOD2	superoxide dismutase [Mn], mitochondrial isoform A	Mitochondrion	Cell proliferation	Superoxide dismutase activity	9	42	24.7	8.25	YES
67782311	SKIV2L	helicase SKI2W	Nucleolus	Regulation of nucleobase, nucleoside, nucleotide and nucleic acid metabolism	RNA binding	4	8	137.7	6.06	YES
67782358	CFB	complement factor B preproprotein	Extracellular	Immune response	Complement activity	3	10	85.5	7.06	YES
67782365	KRT7	keratin, type II cytoskeletal 7	Cytoplasm	Cell growth and/or maintenance	Structural constituent of cytoskeleton	5	85	51.4	5.48	YES
68160937	TRIM25	E3 ubiquitin/ISG15 ligase TRIM25	Nucleus	Regulation of nucleobase, nucleoside, nucleotide and nucleic acid metabolism	Transcription factor activity	1	2	70.9	8.09	YES
68160947	SCG2	secretogranin-2	Golgi apparatus	Protein metabolism	Molecular function unknown	9	36	70.9	4.75	YES
68509926	DHX15	pre-mRNA-splicing factor ATP-dependent RNA helicase DHX15	Nucleus	Regulation of nucleobase, nucleoside, nucleotide and nucleic acid metabolism	RNA binding	3	8	90.9	7.46	YES
68989263	EHHADH	peroxisomal bifunctional enzyme isoform 1	Peroxisome	Metabolism	Catalytic activity	1	2	79.4	9.14	YES
69354671	ABCF1	ATP-binding cassette sub-family F member 1 isoform a	Ribosome	Protein metabolism	Translation regulator activity	1	2	95.9	6.8	YES
70906435	FGB	fibrinogen beta chain isoform 1 preproprotein	Extracellular	Protein metabolism	Protein binding	12	42	55.9	8.27	YES
70906439	FGG	fibrinogen gamma chain isoform gamma-B	Extracellular	Protein metabolism	Protein binding	10	44	51.5	5.62	YES
70995211	ECH1	delta(3,5)-Delta(2,4)-dienoyl-CoA isomerase, mitochondrial	Peroxisome	Metabolism	Catalytic activity	4	12	35.8	8	YES
71037379	PYGL	glycogen phosphorylase, liver form isoform 1	-	Metabolism	Phosphorylase activity	2	14	97.1	7.17	YES
71051616	UROD	uroporphyrinogen decarboxylase	Cytoplasm	Metabolism	Carboxy-lyase activity	1	2	40.8	6.14	YES
71274107	MCAM	cell surface glycoprotein MUC18	Plasma membrane	Cell communication	Cell adhesion molecule activity	2	6	71.6	5.76	YES
71565154	ADH5	alcohol dehydrogenase class-3	Cytoplasm	Metabolism	Oxidoreductase activity	4	13	39.7	7.49	YES
71773010	AP1G1	AP-1 complex subunit gamma-1 isoform a	Cytosol	Vesicle-mediated transport	Transporter activity	3	8	91.7	6.8	YES
71773110	APOA4	apolipoprotein A-IV	Extracellular	Transport	Transporter activity	3	6	45.3	5.38	YES
71773329	ANXA6	annexin A6 isoform 1	Endoplasmic reticulum	Cell communication	Calcium ion binding	3	503	75.8	5.6	YES
72534660	SRSF7	serine/arginine-rich splicing factor 7 isoform 1	-	-	-	1	6	27.4	11.82	YES
72534670	PLAA	phospholipase A-2-activating protein isoform 1	Cytoplasm	Cell communication	Receptor signaling complex scaffold activity	2	6	87.1	6.37	YES
72534692	NT5DC3	5'-nucleotidase domain-containing protein 3	-	Biological_process unknown	Molecular function unknown	5	10	63.4	8.31	YES
73466520	ALDH3A2	fatty aldehyde dehydrogenase isoform 1	Endoplasmic reticulum	Metabolism	Catalytic activity	3	12	57.6	8.92	YES
73486658	GOT2	aspartate aminotransferase, mitochondrial isoform 1	Mitochondrion	Metabolism	Transaminase activity	22	134	47.5	9.01	YES
73747875	PSMB8	proteasome subunit beta type-8 isoform E2	Cytoplasm	Protein metabolism	Ubiquitin-specific protease activity	1	4	30.3	7.43	YES
73747877	WDR7	WD repeat-containing protein 7 isoform 1	Cytoplasmic vesicle	Biological_process unknown	Molecular function unknown	2	9	163.7	6.92	YES
73858568	SERPING1	plasma protease C1 inhibitor	Extracellular matrix	Protein metabolism	Protease inhibitor activity	2	8	55.1	6.55	YES
74099697	HNRNPH2	heterogeneous nuclear ribonucleoprotein H2	Nucleus	Regulation of nucleobase, nucleoside, nucleotide and nucleic acid metabolism	RNA binding	6	47	49.2	6.3	YES
74136559	ERI3	ERI1 exoribonuclease 3 isoform 1	-	Biological_process unknown	Molecular function unknown	1	2	37.2	8.07	YES
74136883	HNRNPU	heterogeneous nuclear ribonucleoprotein U isoform a	Nucleus	Regulation of nucleobase, nucleoside, nucleotide and nucleic acid metabolism	RNA binding	18	86	90.5	6	YES
74271837	GLUL	glutamine synthetase	Cytosol	Metabolism	Transaminase activity	4	14	42	6.89	YES
74272287	MMP9	matrix metalloproteinase-9 preproprotein	Extracellular	Protein metabolism	Metallopeptidase activity	2	4	78.4	6.06	YES
75750480	RHOT1	mitochondrial Rho GTPase 1 isoform 1	Mitochondrion	Apoptosis	GTPase activity	1	2	79.5	6.9	YES
77404397	SND1	staphylococcal nuclease domain-containing protein 1	Nucleus	Regulation of nucleobase, nucleoside, nucleotide and nucleic acid metabolism	Transcription regulator activity	20	103	101.9	7.17	YES
81295407	ACOT9	acyl-coenzyme A thioesterase 9, mitochondrial isoform a	Mitochondrion	Metabolism	Hydrolase activity	5	12	50.8	8.53	YES
82546830	EXOC4	exocyst complex component 4 isoform a	Plasma membrane	Transport	Transporter activity	1	2	110.4	6.49	YES
82546843	BCR	breakpoint cluster region protein isoform 1	Cytoplasm	Cell communication	Protein serine/threonine kinase activity	1	1	142.7	7.03	YES
83627705	UQCRH	cytochrome b-c1 complex subunit 6, mitochondrial isoform 1	Mitochondrion	Metabolism	Catalytic activity	2	14	10.7	4.44	YES
83700220	GGPS1	geranylgeranyl pyrophosphate synthase	Cytoplasm	Metabolism	Transferase activity	1	2	34.8	6.14	YES
83700235	EIF4A2	eukaryotic initiation factor 4A-II	Cytoplasm	Protein metabolism	Translation regulator activity	9	51	46.4	5.48	YES
84000432	FAM91A1	protein FAM91A1 isoform 1	-	Biological_process unknown	Molecular function unknown	2	4	93.9	6.39	YES
87196339	COL6A1	collagen alpha-1(VI) chain	Extracellular	Cell growth and/or maintenance	Extracellular matrix structural constituent	16	117	108.5	5.43	YES
87196351	DDX3X	ATP-dependent RNA helicase DDX3X isoform 1	Nucleus	Regulation of nucleobase, nucleoside, nucleotide and nucleic acid metabolism	RNA binding	5	11	73.2	7.18	YES
88702793	VASN	vasorin	Plasma membrane	Cell communication	Growth factor binding	2	6	71.7	7.39	YES
88703041	SNX6	sorting nexin-6 isoform b	Cytoplasm	Cell communication	Transporter activity	1	2	47.8	6.43	YES
88758603	PICK1	PRKCA-binding protein	Endoplasmic reticulum	Cell communication	Receptor signaling complex scaffold activity	1	2	46.6	5.3	YES
88758615	ITGA2B	integrin alpha-IIb preproprotein	Plasma membrane	Cell communication	Receptor activity	4	8	113.3	5.38	YES
88853069	VTN	vitronectin	Extracellular	Cell growth and/or maintenance	Extracellular matrix structural constituent	5	24	54.3	5.8	YES
88853865	IAH1	isoamyl acetate-hydrolyzing esterase 1 homolog isoform a	-	Energy pathways	Hydrolase activity	7	14	27.6	5.3	YES
89145417	METTL7A	methyltransferase-like protein 7A	-	Metabolism	Methyltransferase activity	3	10	28.3	8.38	YES
90577167	SGSM1	small G protein signaling modulator 1 isoform 1	-	Cell-cell signaling	Molecular function unknown	3	9	129.6	5.69	YES
90669511	CRYZL1	quinone oxidoreductase-like protein 1	-	Metabolism	Oxidoreductase activity	1	2	38.7	5.78	YES
90903240	GPX4	phospholipid hydroperoxide glutathione peroxidase, mitochondrial isoform C	Cytoplasm	Metabolism	Peroxidase activity	2	4	27.1	10.07	YES
91199540	DLD	dihydrolipoyl dehydrogenase, mitochondrial isoform 1	Mitochondrion	Metabolism	Catalytic activity	12	46	54.1	7.85	YES
91208426	PRPF8	pre-mRNA-processing-splicing factor 8	Cytoplasm	Regulation of nucleobase, nucleoside, nucleotide and nucleic acid metabolism	RNA binding	1	2	273.4	8.84	YES
91718899	MAPK3	mitogen-activated protein kinase 3 isoform 1	Cytoplasm	Signal transduction	Protein serine/threonine kinase activity	10	47	43.1	6.74	YES
92091586	MYH11	myosin-11 isoform SM1B	Extracellular	Cell growth and/or maintenance	Structural molecule activity	21	119	227.9	5.5	YES
92091600	ARAP1	arf-GAP with Rho-GAP domain, ANK repeat and PH domain-containing protein 1 isoform c	Golgi apparatus	Cell communication	GTPase activator activity	1	1	162.1	6.23	YES
92859638	SYT5	synaptotagmin-5 isoform 1	Plasma membrane	Transport	Calcium ion binding	4	12	42.9	9.17	YES
93102364	SWAP70	switch-associated protein 70 isoform 1	Cytoplasm	Cell communication	Guanyl-nucleotide exchange factor activity	1	2	69	5.87	YES
93141018	H2AFY	core histone macro-H2A.1 isoform 3	Centrosome	Regulation of nucleobase, nucleoside, nucleotide and nucleic acid metabolism	DNA binding	1	2	39.6	9.79	YES
94538320	HAGH	hydroxyacylglutathione hydrolase, mitochondrial isoform 2	Cytoplasm	Metabolism	Hydrolase activity	11	33	28.8	7.33	YES
94721241	IARS	isoleucine--tRNA ligase, cytoplasmic	Cytoplasm	Protein metabolism	Ligase activity	2	4	144.4	6.15	YES
94721261	CNP	2',3'-cyclic-nucleotide 3'-phosphodiesterase	Cytoplasm	Metabolism	Phosphoric diester hydrolase activity	11	34	47.5	9.07	YES
96974985	CC2D1A	coiled-coil and C2 domain-containing protein 1A	Cytoplasm	Cell communication	Transcription regulator activity	2	4	104	8.09	YES
96975097	RAB6B	ras-related protein Rab-6B	Golgi apparatus	Cell communication	GTPase activity	1	17	23.4	5.53	YES
98986464	TMED10	transmembrane emp24 domain-containing protein 10	Integral to membrane	Transport	Transporter activity	3	10	25	7.44	YES
100816392	FUBP3	far upstream element-binding protein 3	Nucleus	Regulation of nucleobase, nucleoside, nucleotide and nucleic acid metabolism	Transcription factor activity	2	8	61.6	8.38	YES
100913206	DHX9	ATP-dependent RNA helicase A	Cytoplasm	Regulation of nucleobase, nucleoside, nucleotide and nucleic acid metabolism	Transcription factor activity	6	26	140.9	6.84	YES
103471987	ISOC1	isochorismatase domain-containing protein 1	-	Biological_process unknown	Molecular function unknown	4	8	32.2	7.39	YES
104487006	PTPRS	receptor-type tyrosine-protein phosphatase S isoform 1	Plasma membrane	Cell communication	Receptor signaling protein tyrosine phosphatase activity	1	2	216.9	6.46	YES
105990532	APOB	apolipoprotein B-100	Endoplasmic reticulum	Transport	Transporter activity	1	4	515.2	7.05	YES
105990539	NEFL	neurofilament light polypeptide	Cytoplasm	Cell growth and/or maintenance	Structural molecule activity	34	534	61.5	4.65	YES
106507164	RAB12	ras-related protein Rab-12	-	Signal transduction	GTP binding	1	17	27.2	8.41	YES
108773793	G6PD	glucose-6-phosphate 1-dehydrogenase isoform b	Endoplasmic reticulum	Metabolism	Catalytic activity	11	23	59.2	6.84	YES
108773797	GDAP1	ganglioside-induced differentiation-associated protein 1 isoform a	Plasma membrane	Biological_process unknown	Molecular function unknown	4	12	41.3	8.34	YES
108773810	LARS	leucine--tRNA ligase, cytoplasmic isoform 1	Mitochondrion	Metabolism	Ligase activity	1	2	134.4	7.3	YES
109148508	OTUB1	ubiquitin thioesterase OTUB1	-	Protein metabolism	Ubiquitin-specific protease activity	5	16	31.3	4.94	YES
109148542	AARS	alanine--tRNA ligase, cytoplasmic	Cytoplasm	Protein metabolism	Ligase activity	18	63	106.7	5.53	YES
109240550	PSPC1	paraspeckle component 1	Nucleus	Regulation of nucleobase, nucleoside, nucleotide and nucleic acid metabolism	RNA binding	3	6	58.7	6.67	YES
109452587	FAM98B	protein FAM98B	-	Biological_process unknown	Molecular function unknown	1	2	45.5	8.69	YES
109452591	SUCLG1	succinyl-CoA ligase [ADP/GDP-forming] subunit alpha, mitochondrial	Mitochondrion	Metabolism	Ligase activity	2	4	36.2	8.79	YES
110224476	PSAP	prosaposin isoform b preproprotein	Lysosome	Cell communication	Lipid binding	7	20	58.4	5.14	YES
110347423	SPON1	spondin-1	Extracellular	Cell growth and/or maintenance	Extracellular matrix structural constituent	4	9	90.9	6.11	YES
110349772	COL1A1	collagen alpha-1(I) chain preproprotein	Extracellular	Cell growth and/or maintenance	Extracellular matrix structural constituent	2	23	138.8	5.8	YES
110611218	RRBP1	ribosome-binding protein 1	Endoplasmic reticulum	Transport	Transmembrane receptor activity	2	4	108.6	5.54	YES
110624774	MRC2	C-type mannose receptor 2	Plasma membrane	Biological_process unknown	Receptor activity	1	2	166.6	5.83	YES
110815802	C9orf64	UPF0553 protein C9orf64 isoform 1	-	Biological_process unknown	Molecular function unknown	2	4	39	5.88	YES
110815813	ANKFY1	rabankyrin-5 isoform 1	Cytoplasm	Transport	Transporter activity	8	18	128.4	6.1	YES
112380628	LAMP1	lysosome-associated membrane glycoprotein 1	Lysosome	Biological_process unknown	Molecular function unknown	1	10	44.9	8.75	YES
112382237	SYNM	synemin isoform A	Intermediate filament	Cell growth and/or maintenance	Structural constituent of cytoskeleton	43	325	172.8	5.15	YES
112382250	SPTBN1	spectrin beta chain, non-erythrocytic 1 isoform 1	Cytoplasm	Cell growth and/or maintenance	Structural constituent of cytoskeleton	91	737	274.4	5.57	YES
114155144	TPM3	tropomyosin alpha-3 chain isoform Tpm3.2cy	Cytoplasm	Cell growth and/or maintenance	Cytoskeletal protein binding	9	53	28.9	4.75	YES
114199475	VPS41	vacuolar protein sorting-associated protein 41 homolog isoform 1	Cytoplasm	Transport	Transporter activity	2	4	98.5	5.85	YES
115270970	CLCC1	chloride channel CLIC-like protein 1 isoform 1	Endoplasmic reticulum	Transport	Ion channel activity	1	1	62	5.55	YES
115298674	NID1	nidogen-1	Extracellular	Cell growth and/or maintenance	Extracellular matrix structural constituent	15	48	136.3	5.29	YES
115298678	C3	complement C3 preproprotein	Extracellular	Immune response	Complement activity	33	144	187	6.4	YES
115387094	SDHB	succinate dehydrogenase [ubiquinone] iron-sulfur subunit, mitochondrial	Mitochondrion	Metabolism	Catalytic activity	5	18	31.6	8.76	YES
115387104	ALDH9A1	4-trimethylaminobutyraldehyde dehydrogenase	Cytoplasm	Metabolism	Catalytic activity	15	75	56.3	6.57	YES
115430112	REEP5	receptor expression-enhancing protein 5	-	Biological_process unknown	Molecular function unknown	2	4	21.5	8.1	YES
115430219	CRYL1	lambda-crystallin homolog	-	Metabolism	Oxidoreductase activity	2	4	35.4	6.18	YES
115430252	STK39	STE20/SPS1-related proline-alanine-rich protein kinase	Cytoplasm	Cell communication	Protein serine/threonine kinase activity	2	4	59.4	6.29	YES
115511049	GNA11	guanine nucleotide-binding protein subunit alpha-11	Plasma membrane	Cell communication	GTPase activity	4	25	42.1	5.69	YES
116008152	COL15A1	collagen alpha-1(XV) chain	Extracellular	Cell growth and/or maintenance	Extracellular matrix structural constituent	4	14	141.6	5	YES
116008192	MYLK	myosin light chain kinase, smooth muscle isoform 1	Plasma membrane	Cell communication	Protein serine/threonine kinase activity	2	4	210.6	6.15	YES
116008447	CLIP2	CAP-Gly domain-containing linker protein 2 isoform 1	Cytoplasm	Cell communication	Structural constituent of cytoskeleton	4	20	115.7	6.67	YES
116256354	COL4A2	collagen alpha-2(IV) chain preproprotein	Extracellular	Cell growth and/or maintenance	Extracellular matrix structural constituent	5	28	167.4	8.66	YES
116534937	IFIT1	interferon-induced protein with tetratricopeptide repeats 1 isoform 1	Cytoplasm	Biological_process unknown	Nucleic acid binding	1	2	55.3	7.2	YES
116734847	AGL	glycogen debranching enzyme isoform 1	Cytoplasm	Carbohydrate metabolism	Glucosidase activity	3	8	174.7	6.76	YES
116805327	MCCC1	methylcrotonoyl-CoA carboxylase subunit alpha, mitochondrial isoform 1	Mitochondrion	Metabolism	Ligase activity	6	14	80.4	7.78	YES
116805340	GARS	glycine--tRNA ligase isoform 1	Cytoplasm	Protein metabolism	Ligase activity	13	42	83.1	7.03	YES
116875826	HDDC2	HD domain-containing protein 2	-	Biological_process unknown	Molecular function unknown	1	2	23.4	5.49	YES
117168245	ATP8A2	phospholipid-transporting ATPase IB isoform 1	-	Transport	ATPase activity	2	8	133.5	8.12	YES
117168248	HACD3	very-long-chain (3R)-3-hydroxyacyl-CoA dehydratase 3	Mitochondrion	Cell communication	Molecular function unknown	2	6	43.1	8.94	YES
118402586	GLO1	lactoylglutathione lyase	Cytoplasm	Metabolism	Lyase activity	3	10	20.8	5.31	YES
118600975	STXBP3	syntaxin-binding protein 3	Cytoplasmic vesicle	Transport	Transporter activity	1	2	67.7	7.8	YES
118601081	HNRNPUL2	heterogeneous nuclear ribonucleoprotein U-like protein 2	Nucleus	Regulation of nucleobase, nucleoside, nucleotide and nucleic acid metabolism	RNA binding	6	18	85.1	4.91	YES
119360348	FUCA1	tissue alpha-L-fucosidase	Lysosome	Metabolism	Hydrolase activity	1	2	53.7	6.84	YES
119393891	GAA	lysosomal alpha-glucosidase preproprotein	Lysosome	Metabolism	Glucosidase activity	1	2	105.3	6	YES
119395709	F13A1	coagulation factor XIII A chain	Extracellular	Metabolism	Transferase activity	2	4	83.2	6	YES
119395740	ITGA6	integrin alpha-6 isoform a preproprotein	Plasma membrane	Cell communication	Receptor activity	5	10	122	6.8	YES
119395750	KRT1	keratin, type II cytoskeletal 1	Plasma membrane	Cell growth and/or maintenance	Structural molecule activity	28	360	66	8.12	YES
119395754	KRT5	keratin, type II cytoskeletal 5	Cytoplasm	Cell growth and/or maintenance	Structural molecule activity	2	68	62.3	7.74	YES
119703746	ETFDH	electron transfer flavoprotein-ubiquinone oxidoreductase, mitochondrial isoform 1	Mitochondrion	Metabolism	Oxidoreductase activity	5	10	68.5	7.55	YES
119703755	LAMB2	laminin subunit beta-2	Extracellular	Cell growth and/or maintenance	Extracellular matrix structural constituent	22	133	195.9	6.52	YES
119964726	IGF2R	cation-independent mannose-6-phosphate receptor	Plasma membrane	Cell communication	Receptor activity	1	2	274.1	5.91	YES
122939155	NNT	NAD(P) transhydrogenase, mitochondrial	Mitochondrial membrane	Energy pathways	Oxidoreductase activity	3	6	113.8	8.09	YES
122939159	PADI2	protein-arginine deiminase type-2	Cytoplasm	Metabolism	Hydrolase activity	1	2	75.5	5.59	YES
124028525	FARSB	phenylalanine--tRNA ligase beta subunit	Cytoplasm	Protein metabolism	Ligase activity	6	14	66.1	6.84	YES
124248539	AIDA	axin interactor, dorsalization-associated protein	-	Biological_process unknown	Molecular function unknown	1	2	35	6.55	YES
124256489	CRNKL1	crooked neck-like protein 1 isoform a	Nucleus	Regulation of nucleobase, nucleoside, nucleotide and nucleic acid metabolism	RNA binding	1	2	100.4	8	YES
124494238	MYO1C	unconventional myosin-Ic isoform a	Plasma membrane	Cell growth and/or maintenance	Motor activity	1	6	121.6	9.41	YES
124494254	PA2G4	proliferation-associated protein 2G4	Nucleus	Regulation of nucleobase, nucleoside, nucleotide and nucleic acid metabolism	Transcription regulator activity	1	4	43.8	6.55	YES
127139033	POR	NADPH--cytochrome P450 reductase	Endoplasmic reticulum	Metabolism	Catalytic activity	8	20	77	5.58	YES
133922562	PGM5	phosphoglucomutase-like protein 5	Plasma membrane	Metabolism	Catalytic activity	2	4	62.2	7.21	YES
145309326	LAMC1	laminin subunit gamma-1	Extracellular	Cell growth and/or maintenance	Extracellular matrix structural constituent	13	70	177.5	5.12	YES
146231940	CTNND1	catenin delta-1 isoform 1ABC	Cytoplasm	Cell communication	Cell adhesion molecule activity	7	15	108.1	6.23	YES
148224884	PTPMT1	phosphatidylglycerophosphatase and protein-tyrosine phosphatase 1 isoform 1	-	Cell communication	Protein tyrosine/serine/threonine phosphatase activity	1	2	22.8	9.77	YES
148225659	ENDOD1	endonuclease domain-containing 1 protein	-	Regulation of nucleobase, nucleoside, nucleotide and nucleic acid metabolism	Molecular function unknown	4	7	55	5.71	YES
148277071	TXNRD1	thioredoxin reductase 1, cytoplasmic isoform 3	Cytoplasm	Metabolism	Oxidoreductase activity	2	6	70.9	7.39	YES
148470404	HNRNPF	heterogeneous nuclear ribonucleoprotein F	Nucleus	Regulation of nucleobase, nucleoside, nucleotide and nucleic acid metabolism	Ribonucleoprotein	2	26	45.6	5.58	YES
148528975	LONRF2	LON peptidase N-terminal domain and RING finger protein 2	-	Regulation of nucleobase, nucleoside, nucleotide and nucleic acid metabolism	DNA binding	1	2	83.6	5.9	YES
148529014	DDB1	DNA damage-binding protein 1	Nucleus	Regulation of nucleobase, nucleoside, nucleotide and nucleic acid metabolism	DNA repair protein	6	14	126.9	5.26	YES
148536855	COPA	coatomer subunit alpha isoform 1	Cytoplasm	Transport	Transporter activity	4	15	139.2	7.59	YES
148539872	ACAT2	acetyl-CoA acetyltransferase, cytosolic isoform 1	Cytoplasm	Metabolism	Acyltransferase activity	4	12	41.3	6.92	YES
148612849	KIF2A	kinesin-like protein KIF2A isoform 2	Nucleus	Cell growth and/or maintenance	Motor activity	2	4	84	6.37	YES
148612853	ABCF3	ATP-binding cassette sub-family F member 3	-	Transport	Transporter activity	1	2	79.7	6.34	YES
148613856	DDX17	probable ATP-dependent RNA helicase DDX17 isoform 3	Nucleus	Regulation of nucleobase, nucleoside, nucleotide and nucleic acid metabolism	ATPase activity	1	20	80.4	8.37	YES
148664211	CADM1	cell adhesion molecule 1 isoform E	Plasma membrane	Cell communication	Cell adhesion molecule activity	7	41	45.6	5.12	YES
148664230	ANKLE2	ankyrin repeat and LEM domain-containing protein 2	-	Biological_process unknown	Molecular function unknown	1	2	104.1	7.09	YES
148727331	USP5	ubiquitin carboxyl-terminal hydrolase 5 isoform 1	Extracellular	Protein metabolism	Ubiquitin-specific protease activity	25	130	95.7	5.03	YES
148727341	STRAP	serine-threonine kinase receptor-associated protein	Cytoplasm	Signal transduction	Receptor binding	2	4	38.4	5.12	YES
149363689	SEPT8	septin-8 isoform a	Cytoplasmic vesicle	Cell communication	GTPase activity	3	36	55.7	6.28	YES
149589008	PEPD	xaa-Pro dipeptidase isoform 1	Cytoplasm	Protein metabolism	Peptidase activity	4	12	54.5	6	YES
149999606	MOGS	mannosyl-oligosaccharide glucosidase isoform 1	Endoplasmic reticulum	Metabolism	Glucosidase activity	1	2	91.9	8.9	YES
150417981	ARHGAP35	rho GTPase-activating protein 35	Nucleus	Cell communication	Ligand-dependent nuclear receptor activity	2	4	170.4	6.64	YES
150417996	UBA6	ubiquitin-like modifier-activating enzyme 6	-	Protein metabolism	Ubiquitin-specific protease activity	5	10	117.9	6.14	YES
151101140	IFT74	intraflagellar transport protein 74 homolog isoform a	Intracellular vesicle	Cell growth and/or maintenance	Molecular function unknown	1	2	69.2	6	YES
151101292	TMX1	thioredoxin-related transmembrane protein 1	Endoplasmic reticulum	Metabolism	Oxidoreductase activity	1	2	31.8	4.98	YES
151108473	FIS1	mitochondrial fission 1 protein	Mitochondrion	Apoptosis	Molecular function unknown	2	6	16.9	8.79	YES
153218487	KDELC2	KDEL motif-containing protein 2	Extracellular	Biological_process unknown	Molecular function unknown	3	6	58.5	8.24	YES
153251270	CPPED1	serine/threonine-protein phosphatase CPPED1 isoform a	-	Biological_process unknown	Molecular function unknown	1	2	35.5	6.2	YES
153266841	APOH	beta-2-glycoprotein 1	Extracellular	Transport	Transporter activity	4	12	38.3	7.97	YES
153792590	HSP90AA1	heat shock protein HSP 90-alpha isoform 1	Cytoplasm	Protein metabolism	Chaperone activity	28	483	98.1	5.16	YES
153945728	MAP1B	microtubule-associated protein 1B isoform 1	Cytoplasm	Cell growth and/or maintenance	Cytoskeletal protein binding	40	289	270.5	4.81	YES
154090976	SARM1	sterile alpha and TIR motif-containing protein 1	Integral to membrane	Inflammatory response	Transmembrane receptor activity	3	6	79.3	6.55	YES
154350241	ARFGEF3	brefeldin A-inhibited guanine nucleotide-exchange protein 3	-	Biological_process unknown	Molecular function unknown	2	4	240.5	5.82	YES
154759421	PRMT1	protein arginine N-methyltransferase 1 isoform 1	Nucleus	Metabolism	Methyltransferase activity	2	4	42.4	5.35	YES
154937350	PHYHD1	phytanoyl-CoA dioxygenase domain-containing protein 1 isoform a	-	Metabolism	Catalytic activity	3	8	32.4	6.32	YES
155030192	RAP1GDS1	rap1 GTPase-GDP dissociation stimulator 1 isoform 1	-	Cell communication	Guanyl-nucleotide exchange factor activity	7	16	66.3	5.31	YES
155030211	HLA-DRB1	major histocompatibility complex, class II, DR beta 1	Plasma membrane	Immune response	MHC class I receptor activity	3	8	29.9	7.74	YES
155722983	TRAP1	heat shock protein 75 kDa, mitochondrial isoform 1	Mitochondrion	Protein metabolism	Heat shock protein activity	3	24	80.1	8.21	YES
156071459	SLC25A5	ADP/ATP translocase 2	Mitochondrion	Metabolism	ATP binding	6	162	32.8	9.69	YES
156071462	SLC25A6	ADP/ATP translocase 3	Mitochondrion	Transport	Transporter activity	4	199	32.8	9.74	YES
156104878	GLS	glutaminase kidney isoform, mitochondrial isoform 1	Mitochondrion	Metabolism	Deaminase activity	14	34	73.4	7.77	YES
156104880	GMPR	GMP reductase 1	Cytoplasm	Metabolism	Catalytic activity	1	2	37.4	7.06	YES
156416003	SDHA	succinate dehydrogenase [ubiquinone] flavoprotein subunit, mitochondrial isoform 1	Mitochondrion	Metabolism	Catalytic activity	15	84	72.6	7.39	YES
156416005	COMMD9	COMM domain-containing protein 9 isoform 1	-	Biological_process unknown	Molecular function unknown	2	3	21.8	5.88	YES
156523968	PARP1	poly [ADP-ribose] polymerase 1	Nucleus	Protein metabolism	Catalytic activity	14	31	113	8.88	YES
156523970	AHSG	alpha-2-HS-glycoprotein preproprotein	Extracellular	Cell communication	Defense/immunity protein activity	5	14	39.3	5.72	YES
156564357	NQO2	ribosyldihydronicotinamide dehydrogenase [quinone] isoform 1	Cytoplasm	Metabolism	Oxidoreductase activity	2	4	25.9	6.29	YES
156564401	NSF	vesicle-fusing ATPase	Cytoplasm	Metabolism	ATPase activity	42	174	82.5	6.95	YES
156564403	PDHB	pyruvate dehydrogenase E1 component subunit beta, mitochondrial isoform 1	Mitochondrion	Metabolism	Carboxy-lyase activity	4	9	39.2	6.65	YES
156627571	SORD	sorbitol dehydrogenase	Plasma membrane	Metabolism	Catalytic activity	4	11	38.3	7.97	YES
156631005	PSMD8	26S proteasome non-ATPase regulatory subunit 8	Cytoplasm	Protein metabolism	Ubiquitin-specific protease activity	9	30	39.6	9.7	YES
157151755	RPP30	ribonuclease P protein subunit p30 isoform a	Nucleus	Regulation of nucleobase, nucleoside, nucleotide and nucleic acid metabolism	Ribonuclease activity	1	1	35.5	9.61	YES
157168362	PNP	purine nucleoside phosphorylase	Cytoplasm	Metabolism	Phosphorylase activity	2	6	32.1	6.95	YES
157384956	NUBPL	iron-sulfur protein NUBPL isoform 1	-	Biological_process unknown	Molecular function unknown	2	8	34.1	9.04	YES
157389005	CAPN2	calpain-2 catalytic subunit isoform 1	Cytoplasm	Protein metabolism	Cysteine-type peptidase activity	7	18	80	4.98	YES
157412328	CORO1C	coronin-1C isoform a	Cytoplasm	Cell growth and/or maintenance	Cytoskeletal protein binding	3	8	58.9	7.75	YES
157502193	PSMD13	26S proteasome non-ATPase regulatory subunit 13 isoform 1	Cytoplasm	Protein metabolism	Ubiquitin-specific protease activity	11	36	42.9	5.81	YES
157649073	CAP1	adenylyl cyclase-associated protein 1	Cytoplasm	Cell growth and/or maintenance	Molecular function unknown	12	56	51.6	8.02	YES
157738609	HECTD3	E3 ubiquitin-protein ligase HECTD3	-	Protein metabolism	Ubiquitin-specific protease activity	2	4	97.1	5.64	YES
157738649	NEFM	neurofilament medium polypeptide isoform 1	Cytoplasm	Cell growth and/or maintenance	Structural molecule activity	30	579	102.4	4.91	YES
157779135	SUCLG2	succinyl-CoA ligase [GDP-forming] subunit beta, mitochondrial isoform 2	Mitochondrion	Metabolism	Ligase activity	1	2	46.5	6.39	YES
158937236	NPEPPS	puromycin-sensitive aminopeptidase	Cytoplasm	Protein metabolism	Aminopeptidase activity	23	66	103.2	5.72	YES
160420317	FLNA	filamin-A isoform 2	Cytoplasm	Cell growth and/or maintenance	Cytoskeletal anchoring activity	50	275	280.6	6.06	YES
161702986	EZR	ezrin	Cytoplasm	Cell growth and/or maintenance	Cytoskeletal anchoring activity	4	44	69.4	6.27	YES
162417971	SPCS2	signal peptidase complex subunit 2	Microsome	Protein metabolism	Peptidase activity	1	2	25	8.47	YES
163644321	UQCRFS1	cytochrome b-c1 complex subunit Rieske, mitochondrial	Mitochondrion	Metabolism	Catalytic activity	4	13	29.6	8.32	YES
164519076	TM9SF4	transmembrane 9 superfamily member 4	Integral to membrane	Biological_process unknown	Molecular function unknown	1	2	74.5	6.54	YES
164698498	SEPT9	septin-9 isoform b	Cytoskeleton	Cell proliferation	GTP binding	16	63	64.6	7.58	YES
166795297	DYNC1LI1	cytoplasmic dynein 1 light intermediate chain 1	Cytoplasm	Cell growth and/or maintenance	Motor activity	4	8	56.5	6.42	YES
166795299	SLC2A1	solute carrier family 2, facilitated glucose transporter member 1	Plasma membrane	Transport	Auxiliary transport protein activity	1	2	54	8.72	YES
166795301	PCYOX1	prenylcysteine oxidase 1	Lysosome	Metabolism	Catalytic activity	12	32	56.6	6.18	YES
167614485	ACAA2	3-ketoacyl-CoA thiolase, mitochondrial	Mitochondrion	Metabolism	Acyltransferase activity	4	10	41.9	8.09	YES
167614506	LCP1	plastin-2	Cytoplasm	Cell communication	Calcium ion binding	2	14	70.2	5.43	YES
167857790	ORM1	alpha-1-acid glycoprotein 1	Extracellular	Immune response	Defense/immunity protein activity	4	14	23.5	5.11	YES
169790833	LAMP2	lysosome-associated membrane glycoprotein 2 isoform C	Extracellular	Cell growth and/or maintenance	Cell adhesion molecule activity	2	10	45.1	5.91	YES
169790839	SLC1A3	excitatory amino acid transporter 1 isoform 1	Plasma membrane	Transport	Transporter activity	1	6	59.5	8.41	YES
170932494	STX7	syntaxin-7	Cytoplasm	Transport	Protein binding	1	2	29.8	5.55	YES
171906569	BSCL2	seipin isoform 1	Plasma membrane	Biological_process unknown	Molecular function unknown	1	8	51.1	5.27	YES
171906575	DBNL	drebrin-like protein isoform c	Actin cytoskeleton	Signal transduction	Kinase regulator activity	1	4	49	5.05	YES
171906589	BCKDK	[3-methyl-2-oxobutanoate dehydrogenase [lipoamide]] kinase, mitochondrial isoform a	Mitochondrion	Metabolism	Catalytic activity	1	2	46.3	8.82	YES
187829070	CD59	CD59 glycoprotein preproprotein	Extracellular	Immune response	Receptor activity	2	4	14.2	6.48	YES
188035924	ALDH7A1	alpha-aminoadipic semialdehyde dehydrogenase isoform 1	-	Metabolism	Oxidoreductase activity	12	29	58.5	7.99	YES
188528648	TNXB	tenascin-X isoform 1	Extracellular	Cell growth and/or maintenance	Extracellular matrix structural constituent	5	10	457.9	5.17	YES
189011546	ASAH1	acid ceramidase isoform b	Lysosome	Metabolism	Hydrolase activity	7	30	46.5	7.85	YES
189027129	PDE12	2',5'-phosphodiesterase 12 isoform 1	-	Metabolism	Phosphoric diester hydrolase activity	1	6	67.3	6.57	YES
189083692	FBP1	fructose-1,6-bisphosphatase 1	Cytoplasm	Metabolism	Hydrolase activity	1	4	36.8	6.99	YES
189163542	SERPINA1	alpha-1-antitrypsin	Extracellular	Protein metabolism	Protease inhibitor activity	21	144	46.7	5.59	YES
189217915	STXBP5	syntaxin-binding protein 5 isoform b	Cytoplasm	Cell communication	Transporter activity	3	8	127.5	7.28	YES
189458812	GBE1	1,4-alpha-glucan-branching enzyme	-	Metabolism	Transferase activity	10	38	80.4	6.32	YES
190194363	DPYSL4	dihydropyrimidinase-related protein 4	Cytoplasm	Metabolism	Hydrolase activity	6	12	61.8	7.09	YES
190341024	SPARCL1	SPARC-like protein 1 isoform 1	Extracellular	Cell communication	Calcium ion binding	1	2	75.2	4.81	YES
190341060	PHYHIPL	phytanoyl-CoA hydroxylase-interacting protein-like isoform 1	-	Biological_process unknown	Molecular function unknown	2	7	42.5	6.42	YES
190341095	TMEM63C	calcium permeable stress-gated cation channel 1	Integral to membrane	Biological_process unknown	Molecular function unknown	4	14	93.3	7.03	YES
190358517	RAB11B	ras-related protein Rab-11B	Nucleus	Cell communication	GTPase activator activity	3	6	24.5	5.94	YES
190885499	COX5A	cytochrome c oxidase subunit 5A, mitochondrial	Mitochondrion	Metabolism	Oxidoreductase activity	3	18	16.8	6.79	YES
190886457	PAK1	serine/threonine-protein kinase PAK 1 isoform 1	Plasma membrane	Cell communication	Protein serine/threonine kinase activity	2	4	61.6	5.44	YES
193083120	TOMM40	mitochondrial import receptor subunit TOM40 homolog	Mitochondrion	Transport	Transporter activity	1	2	37.9	7.25	YES
193083197	UBLCP1	ubiquitin-like domain-containing CTD phosphatase 1	Nucleus	RNA metabolism	Hydrolase activity	1	2	36.8	6.46	YES
193211616	NIPSNAP1	protein NipSnap homolog 1 isoform 1	Mitochondrion	Biological_process unknown	Molecular function unknown	15	70	33.3	9.31	YES
194018520	GSPT1	eukaryotic peptide chain release factor GTP-binding subunit ERF3A isoform 1	Cytoplasm	Cell communication	GTPase activity	1	4	68.6	5.33	YES
194018537	PRPSAP1	phosphoribosyl pyrophosphate synthase-associated protein 1	Cytoplasm	Metabolism	Enzyme regulator activity	1	4	42.4	8.47	YES
194097323	ECHS1	enoyl-CoA hydratase, mitochondrial	Mitochondrion	Metabolism	Catalytic activity	16	114	31.4	8.07	YES
194272210	KARS	lysine--tRNA ligase isoform 1	Mitochondrion	TRNA aminoacylation	Ligase activity	3	10	71.5	6.81	YES
194294543	COL4A3BP	collagen type IV alpha-3-binding protein isoform 3	Cytoplasm	Signal transduction	Protein serine/threonine kinase activity	1	2	83.7	6.27	YES
194306559	KLC1	kinesin light chain 1 isoform 3	Cytoplasm	Signal transduction	Motor activity	4	10	69.7	5.88	YES
194306562	ABHD17A	protein ABHD17A isoform 1	-	Biological_process unknown	Molecular function unknown	1	2	39.1	7.39	YES
194328758	DNAJA4	dnaJ homolog subfamily A member 4 isoform 1	Plasma membrane	Protein metabolism	Molecular function unknown	2	3	47.9	7.77	YES
194473724	AP1M1	AP-1 complex subunit mu-1 isoform 1	Cytoplasm	Cell communication	Receptor signaling complex scaffold activity	1	2	49.8	7.61	YES
194578909	EIF4E	eukaryotic translation initiation factor 4E isoform 2	Perinuclear region	Protein metabolism	Translation regulator activity	1	2	28.8	6.42	YES
195539395	PSMC6	26S protease regulatory subunit 10B	Cytoplasm	Protein metabolism	Ubiquitin-specific protease activity	9	34	45.8	7.78	YES
195927022	CAB39	calcium-binding protein 39	-	Biological_process unknown	Calcium ion binding	2	4	39.8	6.89	YES
195927044	RTCA	RNA 3'-terminal phosphate cyclase isoform a	-	-	-	3	8	40.7	8.34	YES
195963398	SUGT1	protein SGT1 homolog isoform B	Nucleus	Protein metabolism	Ubiquitin-specific protease activity	1	2	41	5.16	YES
195976807	RBP1	retinol-binding protein 1 isoform a	Cytoplasm	Transport	Transporter activity	4	14	22.3	6.13	YES
197333761	CPNE1	copine-1 isoform b	Cytoplasm	Vesicle-mediated transport	Transporter activity	6	17	59.7	6.04	YES
203098753	PDHX	pyruvate dehydrogenase protein X component, mitochondrial isoform 1	Mitochondrion	Metabolism	Catalytic activity	4	8	54.1	8.66	YES
203098995	SLC2A13	proton myo-inositol cotransporter	Plasma membrane	Transport	Auxiliary transport protein activity	1	2	70.3	5.96	YES
206597445	COL18A1	collagen alpha-1(XVIII) chain isoform 3 preproprotein	Extracellular	Cell growth and/or maintenance	Extracellular matrix structural constituent	12	67	177.8	6.01	YES
208431754	PPP1R21	protein phosphatase 1 regulatory subunit 21 isoform 1	-	Biological_process unknown	Molecular function unknown	2	4	88.3	6.84	YES
208431793	DCTN4	dynactin subunit 4 isoform a	Cytoplasm	Biological_process unknown	Molecular function unknown	1	2	53.1	7.39	YES
208879465	VDAC3	voltage-dependent anion-selective channel protein 3 isoform 2	Mitochondrion	Transport	Voltage-gated ion channel activity	12	94	30.8	8.66	YES
208973246	QDPR	dihydropteridine reductase isoform 1	Extracellular	Metabolism	Catalytic activity	11	44	25.8	7.37	YES
209180457	TOM1	target of Myb protein 1 isoform 2	Cytoplasm	Cell communication	Transporter activity	4	14	53.8	4.74	YES
209693439	SNCG	gamma-synuclein	Cytoplasm	Protein metabolism	Chaperone activity	4	12	13.3	4.86	YES
209862837	EPHX1	epoxide hydrolase 1	Endoplasmic reticulum	Metabolism	Hydrolase activity	12	50	52.9	7.25	YES
209862901	DHRS1	dehydrogenase/reductase SDR family member 1	Endoplasmic reticulum	Metabolism	Catalytic activity	1	2	33.9	7.83	YES
209862907	POSTN	periostin isoform 1	-	Cell communication	Cell adhesion molecule activity	1	2	93.3	7.53	YES
212549553	ILF3	interleukin enhancer-binding factor 3 isoform d	Nucleus	Regulation of gene expression, epigenetic	Transcription regulator activity	3	10	95.7	8.81	YES
213417737	ECHDC1	ethylmalonyl-CoA decarboxylase isoform 5	-	Biological_process unknown	Molecular function unknown	5	10	33.7	8.21	YES
213511508	BCAP31	B-cell receptor-associated protein 31 isoform a	Endoplasmic reticulum	Transport	Transporter activity	2	14	34.7	7.84	YES
215272352	PPP3CB	serine/threonine-protein phosphatase 2B catalytic subunit beta isoform isoform a	Cytoplasm	Cell communication	Protein serine/threonine phosphatase activity	2	6	59.1	5.91	YES
215422338	PDK3	pyruvate dehydrogenase kinase, isozyme 3 isoform 1	Mitochondrion	Metabolism	Catalytic activity	2	4	48	8.69	YES
215598688	USP13	ubiquitin carboxyl-terminal hydrolase 13	-	Protein metabolism	Ubiquitin-specific protease activity	1	4	97.3	5.53	YES
216548223	SV2A	synaptic vesicle glycoprotein 2A isoform 1	-	Biological_process unknown	Neurotransmitter transporter activity	5	18	82.6	5.57	YES
217035105	DNAJC11	dnaJ homolog subfamily C member 11	-	Biological_process unknown	Molecular function unknown	2	4	63.2	8.4	YES
217272849	P4HA1	prolyl 4-hydroxylase subunit alpha-1 isoform 2	Endoplasmic reticulum	Metabolism	Oxidoreductase activity	1	2	61	6.01	YES
217272892	EFTUD2	116 kDa U5 small nuclear ribonucleoprotein component isoform a	Nucleus	Protein metabolism	GTPase activity	5	14	109.4	5	YES
217330598	GLOD4	glyoxalase domain-containing protein 4	Mitochondrion	Biological_process unknown	Molecular function unknown	1	2	33.2	5.6	YES
219842262	COPS2	COP9 signalosome complex subunit 2 isoform 2	Nucleus	Regulation of nucleobase, nucleoside, nucleotide and nucleic acid metabolism	Transcription regulator activity	4	10	52.4	5.47	YES
221139785	SCG5	neuroendocrine protein 7B2 isoform 1	Extracellular	Protein metabolism	Chaperone activity	3	13	23.7	5.96	YES
221307584	PHB2	prohibitin-2 isoform 1	Mitochondrion	Regulation of nucleobase, nucleoside, nucleotide and nucleic acid metabolism	Transcription regulator activity	12	62	33.3	9.83	YES
221316588	BPHL	valacyclovir hydrolase isoform 1	-	Metabolism	Hydrolase activity	4	12	32.5	9.14	YES
221316599	CHGB	secretogranin-1	Extracellular	Cell communication	Hormone activity	30	164	78.2	5.07	YES
221316632	COPB1	coatomer subunit beta	Cytoplasm	Transport	Transporter activity	5	16	107.1	6.05	YES
221316695	MMRN2	multimerin-2	Extracellular	Cell growth and/or maintenance	Extracellular matrix structural constituent	4	8	104.3	5.86	YES
221625487	IMPA1	inositol monophosphatase 1 isoform 2	Cytoplasm	Metabolism	Phosphoprotein phosphatase activity	4	14	36.7	7.91	YES
222080062	NDUFV2	NADH dehydrogenase [ubiquinone] flavoprotein 2, mitochondrial	Mitochondrion	Metabolism	Oxidoreductase activity	4	14	27.4	8.06	YES
222136617	MX1	interferon-induced GTP-binding protein Mx1 isoform a	Cytoplasm	Cell communication	GTPase activity	10	32	75.5	5.83	YES
222136639	MTHFD1	C-1-tetrahydrofolate synthase, cytoplasmic	Cytoplasm	Metabolism	Catalytic activity	18	44	101.5	7.3	YES
222144319	RAB34	ras-related protein Rab-34 isoform 5	Plasma membrane	Cell communication	GTPase activity	1	2	35.2	8.63	YES
222352151	PCBP1	poly(rC)-binding protein 1	Nucleus	Regulation of nucleobase, nucleoside, nucleotide and nucleic acid metabolism	RNA binding	2	28	37.5	7.09	YES
222418611	ITGA7	integrin alpha-7 isoform 2	Plasma membrane	Cell communication	Cell adhesion molecule activity	3	6	124.2	5.92	YES
222537732	SCRN2	secernin-2 isoform 1	Cytoplasm	Protein metabolism	Aminopeptidase activity	1	2	46.6	5.67	YES
223029410	TLN1	talin-1	Extracellular	Cell growth and/or maintenance	Cytoskeletal protein binding	27	106	269.6	6.07	YES
223029449	NPDC1	neural proliferation differentiation and control protein 1	Nucleus	Cell growth and/or maintenance	Molecular function unknown	1	20	34.5	7.01	YES
223468676	RELA	transcription factor p65 isoform 1	Cytoplasm	Regulation of nucleobase, nucleoside, nucleotide and nucleic acid metabolism	Transcription factor activity	1	2	60.2	5.68	YES
223555975	TPM4	tropomyosin alpha-4 chain isoform Tpm4.1cy	Cytoskeleton	Cell growth and/or maintenance	Structural constituent of cytoskeleton	4	36	32.7	4.73	YES
223718046	EXOC7	exocyst complex component 7 isoform 4	Cytoplasm	Biological_process unknown	Molecular function unknown	2	4	83.3	6.79	YES
223942032	NECAP2	adaptin ear-binding coat-associated protein 2 isoform 2	-	Biological_process unknown	Molecular function unknown	1	2	29.4	8.38	YES
223972651	ALDH16A1	aldehyde dehydrogenase family 16 member A1 isoform 1	-	Biological_process unknown	Molecular function unknown	2	6	85.1	6.79	YES
224028244	NONO	non-POU domain-containing octamer-binding protein isoform 1	Nucleus	Regulation of nucleobase, nucleoside, nucleotide and nucleic acid metabolism	RNA binding	3	10	54.2	8.95	YES
224451073	EXOG	nuclease EXOG, mitochondrial isoform 1	-	Regulation of nucleobase, nucleoside, nucleotide and nucleic acid metabolism	Molecular function unknown	1	2	41.1	8.27	YES
224451142	STMN1	stathmin isoform b	Cytoplasm	Cell growth and/or maintenance	Signal transducer activity	1	4	19.8	7.02	YES
224465190	SCRN1	secernin-1 isoform b	Cytoplasm	Immune response	Peptidase activity	7	30	48.7	4.78	YES
224493905	ZSCAN18	zinc finger and SCAN domain-containing protein 18 isoform 1	Nucleus	Regulation of nucleobase, nucleoside, nucleotide and nucleic acid metabolism	Transcription factor activity	1	2	60.8	4.88	YES
224496106	REXO2	oligoribonuclease, mitochondrial	Mitochondrion	Regulation of nucleobase, nucleoside, nucleotide and nucleic acid metabolism	Ribonuclease activity	2	4	26.8	6.87	YES
224831239	ITGAM	integrin alpha-M isoform 1	Plasma membrane	Cell communication	Receptor activity	1	2	127.2	7.23	YES
224831253	OPA1	dynamin-like 120 kDa protein, mitochondrial isoform 8	Mitochondrion	Cell communication	GTPase activity	12	37	117.7	7.77	YES
225543097	PAFAH1B3	platelet-activating factor acetylhydrolase IB subunit gamma	Cytoplasm	Metabolism	Acyltransferase activity	1	1	25.7	6.84	YES
225543166	SAMM50	sorting and assembly machinery component 50 homolog	Mitochondrion	Biological_process unknown	Molecular function unknown	2	4	51.9	6.9	YES
225703079	MBOAT7	lysophospholipid acyltransferase 7 isoform 1	Plasma membrane	Biological_process unknown	Receptor activity	1	2	52.7	8.97	YES
226059159	PTGR1	prostaglandin reductase 1 isoform 1	Cytoplasm	Metabolism	Catalytic activity	2	4	35.8	8.29	YES
226246671	RPS20	40S ribosomal protein S20 isoform 1	Ribosome	Protein metabolism	Structural constituent of ribosome	1	2	16	9.32	YES
226442763	PCYOX1L	prenylcysteine oxidase-like isoform 1	-	Biological_process unknown	Molecular function unknown	1	2	54.6	7.31	YES
226443152	ABHD14B	protein ABHD14B isoform 1	-	Biological_process unknown	Molecular function unknown	3	6	22.3	6.4	YES
226529917	TPI1	triosephosphate isomerase isoform 2	Cytoplasm	Metabolism	Isomerase activity	27	237	30.8	5.92	YES
228008291	SYNCRIP	heterogeneous nuclear ribonucleoprotein Q isoform 1	Cytoplasm	Regulation of nucleobase, nucleoside, nucleotide and nucleic acid metabolism	RNA binding	3	18	69.6	8.59	YES
237757310	SYNJ1	synaptojanin-1 isoform a	Synaptic vesicle	Metabolism	Hydrolase activity	3	14	177.4	8.22	YES
238814371	ALDH3B1	aldehyde dehydrogenase family 3 member B1 isoform a	Mitochondrial matrix	Metabolism	Catalytic activity	1	2	51.8	7.62	YES
241982780	PDCD6IP	programmed cell death 6-interacting protein isoform 2	Cytoplasm	Apoptosis	Molecular function unknown	9	36	96.7	6.52	YES
253970456	HTATSF1	HIV Tat-specific factor 1	Nucleus	Regulation of nucleobase, nucleoside, nucleotide and nucleic acid metabolism	Transcription factor activity	4	8	85.8	4.4	YES
255958282	PLIN3	perilipin-3 isoform 1	Extracellular	Transport	Transporter activity	1	1	47	5.44	YES
256222019	RAB10	ras-related protein Rab-10	Nucleus	Cell communication	GTPase activity	2	43	22.5	8.38	YES
256222411	FLNB	filamin-B isoform 1	Cytoplasm	Cell growth and/or maintenance	Cytoskeletal protein binding	31	110	281.5	5.71	YES
258613875	KANK2	KN motif and ankyrin repeat domain-containing protein 2 isoform 1	-	Biological_process unknown	Structural molecule activity	1	2	91.9	5.63	YES
260274832	ECI2	enoyl-CoA delta isomerase 2, mitochondrial isoform 2	Peroxisome	Fatty acid metabolism	Isomerase activity	2	4	43.6	9	YES
260436862	AP1B1	AP-1 complex subunit beta-1 isoform a	Golgi apparatus	Transport	Transporter activity	6	81	104.5	5.06	YES
260763922	TMOD1	tropomodulin-1	Cytoplasm	Cell growth and/or maintenance	Cytoskeletal protein binding	1	2	40.5	5.1	YES
262118227	COX7A2	cytochrome c oxidase subunit 7A2, mitochondrial	Mitochondrion	Metabolism	Oxidoreductase activity	1	4	12.8	9.13	YES
283436220	ATAD3A	ATPase family AAA domain-containing protein 3A isoform 1	-	Metabolism	ATPase activity	4	10	71.3	8.98	YES
284172420	PREPL	prolyl endopeptidase-like isoform 1	-	Protein metabolism	Serine-type peptidase activity	1	3	83.9	6.38	YES
284448551	CYB5R3	NADH-cytochrome b5 reductase 3 isoform 3	Endoplasmic reticulum	Metabolism	Catalytic activity	5	16	38.2	6.9	YES
284795266	SRPRB	signal recognition particle receptor subunit beta	Cytoplasm	Protein metabolism	GTPase activity	1	1	29.7	9.04	YES
285002233	GPD2	glycerol-3-phosphate dehydrogenase, mitochondrial	Mitochondrion	Metabolism	Catalytic activity	16	42	80.8	7.69	YES
288541299	FAM114A1	protein NOXP20	Cytoplasm	Biological_process unknown	Molecular function unknown	1	2	60.7	4.68	YES
289177074	RRM2B	ribonucleoside-diphosphate reductase subunit M2 B isoform 2	Nucleus	Regulation of nucleobase, nucleoside, nucleotide and nucleic acid metabolism	Catalytic activity	1	2	48.8	7.99	YES
289577080	EIF4G2	eukaryotic translation initiation factor 4 gamma 2 isoform 1	Ribosome	Protein metabolism	Translation regulator activity	3	6	102.3	7.14	YES
290491128	PALM2	paralemmin-2 isoform a	Plasma membrane	Cell growth and/or maintenance	Molecular function unknown	1	2	45.4	5.08	YES
291084742	PDHA1	pyruvate dehydrogenase E1 component subunit alpha, somatic form, mitochondrial isoform 2	Mitochondrion	Metabolism	Catalytic activity	18	67	47.5	8.54	YES
291575128	LDHB	L-lactate dehydrogenase B chain isoform LDHB	Cytoplasm	Metabolism	Catalytic activity	18	196	36.6	6.05	YES
291621647	PGRMC2	membrane-associated progesterone receptor component 2	Plasma membrane	Cell communication	Steroid hormone receptor activity	4	10	26.2	5.31	YES
293336691	HDAC2	histone deacetylase 2	Nucleus	Regulation of nucleobase, nucleoside, nucleotide and nucleic acid metabolism	Transcription regulator activity	1	2	55.3	5.91	YES
294832006	PPP2R2A	serine/threonine-protein phosphatase 2A 55 kDa regulatory subunit B alpha isoform isoform 2	Cytoplasm	Cell communication	Protein serine/threonine phosphatase activity	5	26	53	6.49	YES
294997294	DAG1	dystroglycan preproprotein	Plasma membrane	Cell communication	Cell adhesion molecule activity	1	2	97.5	8.56	YES
295821216	PCCB	propionyl-CoA carboxylase beta chain, mitochondrial isoform 2	Mitochondrion	Metabolism	Ligase activity	5	10	60.5	7.24	YES
295844834	NAGK	N-acetyl-D-glucosamine kinase	-	Metabolism	Catalytic activity	6	14	42	6.68	YES
295849266	DBI	acyl-CoA-binding protein isoform 4	Extracellular	Metabolism	Receptor binding	1	2	16.5	9.38	YES
296010904	BCAT1	branched-chain-amino-acid aminotransferase, cytosolic isoform 4	Cytoplasm	Metabolism	Transaminase activity	3	10	44.1	5.39	YES
296080746	CTTN	src substrate cortactin isoform c	Cytoplasm	Cell growth and/or maintenance	Cytoskeletal protein binding	1	2	70.9	6.64	YES
296179427	HADH	hydroxyacyl-coenzyme A dehydrogenase, mitochondrial isoform 1	Mitochondrion	Biological_process unknown	Molecular function unknown	5	22	36	8.53	YES
296317244	ESYT1	extended synaptotagmin-1 isoform 1	Plasma membrane	Cell communication	Calcium ion binding	13	38	123.9	5.78	YES
296317337	VDAC2	voltage-dependent anion-selective channel protein 2 isoform 1	Mitochondrion	Transport	Voltage-gated ion channel activity	10	87	33.4	7.59	YES
296841136	PCYT2	ethanolamine-phosphate cytidylyltransferase isoform 1	Cytoplasm	Metabolism	Nucleotidyltransferase activity	1	2	45.6	6.73	YES
297206823	NDUFS5	NADH dehydrogenase [ubiquinone] iron-sulfur protein 5	Mitochondrion	Metabolism	Oxidoreductase activity	1	2	12.5	9.14	YES
297307158	ADD2	beta-adducin isoform a	Nucleus	Cell growth and/or maintenance	Cytoskeletal anchoring activity	3	6	80.8	5.92	YES
297374782	ARHGDIA	rho GDP-dissociation inhibitor 1 isoform a	Cytoplasm	Cell growth and/or maintenance	Molecular function unknown	7	25	23.2	5.11	YES
297747286	PFDN6	prefoldin subunit 6	-	Protein metabolism	Chaperone activity	1	1	14.6	8.88	YES
300192933	AFG3L2	AFG3-like protein 2	Mitochondrion	Transport	ATPase activity	5	24	88.5	8.66	YES
300795584	EML2	echinoderm microtubule-associated protein-like 2 isoform 1	Nucleus	Cell growth and/or maintenance	Cytoskeletal protein binding	2	8	92	7.06	YES
301069322	ASPN	asporin isoform 1 preproprotein	Extracellular	Cell growth and/or maintenance	Extracellular matrix structural constituent	1	2	43.3	7.28	YES
304766523	C16orf62	UPF0505 protein C16orf62 isoform 1	Nucleus	Biological_process unknown	Molecular function unknown	1	2	118.5	7.84	YES
308818195	DPYSL2	dihydropyrimidinase-related protein 2 isoform 1	Cytoplasm	Cell communication	Cytoskeletal protein binding	30	544	73.5	6.35	YES
308818200	DPYSL3	dihydropyrimidinase-related protein 3 isoform 1	Cytoplasm	Metabolism	Hydrolase activity	27	212	73.9	6.35	YES
309384265	OXR1	oxidation resistance protein 1 isoform 3	Mitochondrion	Biological_process unknown	Molecular function unknown	4	10	97.9	5.47	YES
311078508	RBBP7	histone-binding protein RBBP7 isoform 1	Nucleus	Regulation of nucleobase, nucleoside, nucleotide and nucleic acid metabolism	Transcription regulator activity	1	2	52.3	5.27	YES
312032453	ATP6V1F	V-type proton ATPase subunit F isoform 2	Plasma membrane	Metabolism	ATPase activity	1	2	16.4	5.08	YES
312283701	MDH1	malate dehydrogenase, cytoplasmic isoform 2	Cytoplasm	Metabolism	Catalytic activity	13	94	38.6	7.71	YES
313760624	PECAM1	platelet endothelial cell adhesion molecule	Plasma membrane	Cell communication	Cell adhesion molecule activity	4	12	82.5	6.99	YES
313760653	PACSIN1	protein kinase C and casein kinase substrate in neurons protein 1	Cytoplasm	Cell communication	Receptor signaling complex scaffold activity	11	28	50.9	5.24	YES
315467838	GLRX3	glutaredoxin-3 isoform 1	Cytoplasm	Biological_process unknown	Molecular function unknown	1	4	37.4	5.39	YES
315583337	PARVA	alpha-parvin	Plasma membrane	Cell growth and/or maintenance	Cytoskeletal protein binding	1	4	46.6	8.4	YES
315707006	PGM3	phosphoacetylglucosamine mutase isoform 1	Cytoplasm	Metabolism	Catalytic activity	2	6	62.9	6	YES
316983160	NDUFS1	NADH-ubiquinone oxidoreductase 75 kDa subunit, mitochondrial isoform 5	Mitochondrion	Metabolism	Oxidoreductase activity	19	50	80.9	6.64	YES
324021745	GC	vitamin D-binding protein isoform 3	Extracellular	Transport	Transporter activity	7	25	55	5.63	YES
325301072	SSR4	translocon-associated protein subunit delta isoform 1	Endoplasmic reticulum	Transport	Auxiliary transport protein activity	2	7	20.2	5.81	YES
325651836	SMARCA5	SWI/SNF-related matrix-associated actin-dependent regulator of chromatin subfamily A member 5	Nucleus	Regulation of nucleobase, nucleoside, nucleotide and nucleic acid metabolism	DNA binding	3	6	121.8	8.09	YES
330340389	USMG5	up-regulated during skeletal muscle growth protein 5	Integral to membrane	Biological_process unknown	Molecular function unknown	1	1	6.5	9.76	YES
333944015	CDH13	cadherin-13 isoform 2	Plasma membrane	Cell growth and/or maintenance	Cell adhesion molecule activity	1	2	83.3	5.12	YES
334848198	TWF1	twinfilin-1 isoform 1	Actin cytoskeleton	Cell communication	Protein-tyrosine kinase activity	1	1	41	6.73	YES
336285440	NCAM1	neural cell adhesion molecule 1 isoform 5	Plasma membrane	Cell communication	Cell adhesion molecule activity	20	237	97.3	4.93	YES
338827685	AP2A2	AP-2 complex subunit alpha-2 isoform 1	Plasma membrane	Transport	Transporter activity	10	103	104	6.86	YES
338827746	ARFIP2	arfaptin-2 isoform 1	Nucleus	Cell growth and/or maintenance	Structural molecule activity	1	2	41.6	6.38	YES
338968930	CSDE1	cold shock domain-containing protein E1 isoform 4	Cytoplasm	Regulation of gene expression, epigenetic	RNA binding	6	16	93.7	6.52	YES
339409190	SNX1	sorting nexin-1 isoform d	Endosome	Cell communication	Transporter activity	1	2	63	5.48	YES
345110632	EPDR1	mammalian ependymin-related protein 1 isoform 1	Extracellular	Cell communication	Cell adhesion molecule activity	2	4	25.4	6.6	YES
354721184	RAB5C	ras-related protein Rab-5C isoform b	Endosome	Cell communication	GTPase activity	2	6	27	8.66	YES
354983493	PCMT1	protein-L-isoaspartate(D-aspartate) O-methyltransferase isoform 2	Cytoplasm	Protein metabolism	Methyltransferase activity	13	86	30.3	6.73	YES
359465572	BLVRA	biliverdin reductase A	Cytoplasm	Metabolism	Oxidoreductase activity	3	10	33.4	6.44	YES
371940940	ATP1A3	sodium/potassium-transporting ATPase subunit alpha-3 isoform 3	Plasma membrane	Transport	Transporter activity	15	282	113	5.38	YES
372466572	KRT8	keratin, type II cytoskeletal 8 isoform 1	Cytoplasm	Cell growth and/or maintenance	Structural molecule activity	15	142	56.6	5.43	YES
374717343	SLC25A1	tricarboxylate transport protein, mitochondrial isoform b	Mitochondrion	Transport	Transporter activity	5	20	35	9.99	YES
376319237	GDAP1L1	ganglioside-induced differentiation-associated protein 1-like 1 isoform 1	Integral to membrane	Biological_process unknown	Molecular function unknown	3	6	43.8	6.84	YES
378548190	RPS3	40S ribosomal protein S3 isoform 1	Cytoplasm	Protein metabolism	Structural constituent of ribosome	11	46	26.7	9.66	YES
379030615	DNAJC6	putative tyrosine-protein phosphatase auxilin isoform 1	Nucleus	Protein metabolism	Chaperone activity	2	7	105.6	7.47	YES
380692342	DDX6	probable ATP-dependent RNA helicase DDX6	Cytoplasm	Regulation of nucleobase, nucleoside, nucleotide and nucleic acid metabolism	RNA binding	2	4	54.4	8.66	YES
380714665	CUL3	cullin-3 isoform 3	Nucleus	Protein metabolism	Ubiquitin-specific protease activity	3	6	89.7	7.97	YES
380837121	SEC22B	vesicle-trafficking protein SEC22b	Endoplasmic reticulum	Cell communication	Transporter activity	5	12	24.7	8.51	YES
384229051	TYMP	thymidine phosphorylase isoform 2	Cytoplasm	Cell communication	Growth factor activity	1	2	50.4	5.53	YES
385137130	SELENBP1	selenium-binding protein 1 isoform 3	Cytoplasm	Protein metabolism	Molecular function unknown	11	29	56.8	6.48	YES
386642862	TARS	threonine--tRNA ligase, cytoplasmic isoform 2	Cytoplasm	Metabolism	Ligase activity	6	14	86.8	6.77	YES
386781550	RDX	radixin isoform 1	Plasma membrane	Cell growth and/or maintenance	Cytoskeletal protein binding	3	44	71	6.71	YES
387527972	DCTN2	dynactin subunit 2 isoform 2	Cytoplasm	Cell growth and/or maintenance	Motor activity	13	58	44.4	5.17	YES
388240801	LMNB2	lamin-B2	Nucleus	Cell growth and/or maintenance	Structural molecule activity	26	127	69.9	5.59	YES
392494079	DBT	lipoamide acyltransferase component of branched-chain alpha-keto acid dehydrogenase complex, mitochondrial	Mitochondrion	Metabolism	Acyltransferase activity	3	8	53.5	8.51	YES
394025704	ARPC5	actin-related protein 2/3 complex subunit 5 isoform 2	Cytoskeleton	Cell growth and/or maintenance	Cytoskeletal protein binding	1	2	16.6	6.02	YES
394025723	ACADVL	very long-chain specific acyl-CoA dehydrogenase, mitochondrial isoform 3	Mitochondrion	Energy pathways	Catalytic activity	20	64	72.9	8.75	YES
399498490	CRIP2	cysteine-rich protein 2 isoform 2	Cytoplasm	Regulation of nucleobase, nucleoside, nucleotide and nucleic acid metabolism	Receptor signaling complex scaffold activity	1	8	30.2	8.22	YES
409971401	PPME1	protein phosphatase methylesterase 1 isoform b	-	Metabolism	Methyltransferase activity	1	2	43.8	5.85	YES
422398832	PSMD6	26S proteasome non-ATPase regulatory subunit 6 isoform 1	Peroxisome	Protein metabolism	Ubiquitin-specific protease activity	3	5	51.9	6.74	YES
422398885	DYNC1I2	cytoplasmic dynein 1 intermediate chain 2 isoform 1	Cytoplasm	Cell growth and/or maintenance	Motor activity	8	34	71.4	5.2	YES
426214088	RCN2	reticulocalbin-2 isoform b	Endoplasmic reticulum	Cell communication	Calcium ion binding	2	10	39.1	4.45	YES
469608410	TAGLN2	transgelin-2 isoform a	-	Biological_process unknown	Molecular function unknown	5	18	24.4	8.25	YES
503774379	CDK5RAP3	CDK5 regulatory subunit-associated protein 3 isoform c	-	Regulation of cell cycle	Molecular function unknown	1	2	59.6	4.92	YES
510937025	DNM1L	dynamin-1-like protein isoform 5	Endoplasmic reticulum	Mitochondrion organization and biogenesis	GTPase activity	11	49	83.3	7.08	YES
511772996	AP3B2	AP-3 complex subunit beta-2 isoform 1	Cytoplasm	Transport	Transporter activity	1	2	121.1	5.43	YES
520975477	RANBP1	ran-specific GTPase-activating protein isoform 1	Centrosome	Cell communication	Transporter activity	4	16	31.9	8.75	YES
523425718	RAB23	ras-related protein Rab-23	Plasma membrane	Cell communication	Transporter activity	1	2	26.6	6.6	YES
527498279	PHB	prohibitin isoform 1	Mitochondrion	Cell communication	Receptor signaling complex scaffold activity	21	136	29.8	5.76	YES
530360517	MTOR	PREDICTED: serine/threonine-protein kinase mTOR isoform X1	Plasma membrane	Cell communication	Kinase activity	3	9	288.7	7.17	YES
530360735	MFN2	PREDICTED: mitofusin-2 isoform X1	Mitochondrion	Metabolism	Molecular function unknown	2	4	86.3	6.98	YES
530360807	LYPLA2	PREDICTED: acyl-protein thioesterase 2 isoform X1	-	Metabolism	Phospholipase activity	1	8	26.1	7.75	YES
530360927	EMC1	PREDICTED: ER membrane protein complex subunit 1 isoform X1	-	-	-	1	2	112	7.66	YES
530360990	ALPL	PREDICTED: alkaline phosphatase, tissue-nonspecific isozyme isoform X1	Plasma membrane	Metabolism	Catalytic activity	1	4	57.3	6.67	YES
530361785	OSCP1	PREDICTED: protein OSCP1 isoform X1	-	Biological_process unknown	Molecular function unknown	1	4	44.6	5.83	YES
530362058	CC2D1B	PREDICTED: coiled-coil and C2 domain-containing protein 1B isoform X2	-	Cell communication	Molecular function unknown	1	2	93.5	5.24	YES
530362268	MACF1	PREDICTED: microtubule-actin cross-linking factor 1 isoform X1	Cytoplasm	Cell communication	Cytoskeletal protein binding	3	8	873	5.33	YES
530362302	KPNA6	PREDICTED: importin subunit alpha-7 isoform X1	Nucleus	Transport	Receptor signaling complex scaffold activity	1	6	63	4.93	YES
530363405	HYI	PREDICTED: putative hydroxypyruvate isomerase isoform X1	Nucleus	Regulation of nucleobase, nucleoside, nucleotide and nucleic acid metabolism	DNA binding	1	2	33	6.09	YES
530364323	KIFAP3	PREDICTED: kinesin-associated protein 3 isoform X1	Nucleus	Transport	Transporter activity	1	2	91.7	5.22	YES
530364640	IFI16	PREDICTED: gamma-interferon-inducible protein 16 isoform X1	Nucleus	Regulation of cell growth	Transcription regulator activity	1	2	88.6	9.29	YES
530364807	NDUFS2	PREDICTED: NADH dehydrogenase [ubiquinone] iron-sulfur protein 2, mitochondrial isoform X1	Mitochondrion	Metabolism	Oxidoreductase activity	4	12	52.5	7.55	YES
530364819	NIT1	PREDICTED: nitrilase homolog 1 isoform X2	-	Metabolism	Molecular function unknown	1	4	37.9	8.02	YES
530365425	SNX27	PREDICTED: sorting nexin-27 isoform X1	Cytosol	Vesicle-mediated transport	Transporter activity	5	9	61.2	6.49	YES
530366143	GUK1	PREDICTED: guanylate kinase isoform X1	Mitochondrion	Cell communication	Catalytic activity	1	2	31.5	7.9	YES
530366454	C4BPA	PREDICTED: C4b-binding protein alpha chain isoform X1	Extracellular	Immune response	Complement activity	2	8	67	7.3	YES
530367362	EFEMP1	PREDICTED: EGF-containing fibulin-like extracellular matrix protein 1 isoform X1	Extracellular	Cell growth and/or maintenance	Extracellular matrix structural constituent	1	2	59.3	7.74	YES
530368092	CAD	PREDICTED: CAD protein isoform X1	Cytoplasm	Metabolism	Ligase activity	5	11	244.6	6.52	YES
530368154	DYSF	PREDICTED: dysferlin isoform X1	Plasma membrane	Cell communication	Molecular function unknown	2	9	242.6	5.82	YES
530369146	BIN1	PREDICTED: myc box-dependent-interacting protein 1 isoform X1	Cytoplasm	Cell communication	Receptor signaling complex scaffold activity	4	10	66.6	5.45	YES
530369695	LANCL1	PREDICTED: lanC-like protein 1 isoform X1	Plasma membrane	Immune response	G-protein coupled receptor activity	6	20	46.5	7.87	YES
530370025	FN1	PREDICTED: fibronectin isoform X1	Extracellular	Cell growth and/or maintenance	Extracellular matrix structural constituent	12	42	272.7	5.58	YES
530370305	INPP1	PREDICTED: inositol polyphosphate 1-phosphatase isoform X1	Cytoplasm	Cell communication	Catalytic activity	1	2	44	5.26	YES
530370547	PPIL3	PREDICTED: peptidyl-prolyl cis-trans isomerase-like 3 isoform X1	Cytoplasm	Metabolism	Isomerase activity	1	2	18.6	7.01	YES
530371928	CTNNB1	PREDICTED: catenin beta-1 isoform X1	Cytoplasm	Cell communication	Cell adhesion molecule activity	7	48	85.4	5.86	YES
530372179	LARS2	PREDICTED: probable leucine--tRNA ligase, mitochondrial isoform X1	Mitochondrion	Metabolism	Transferase activity	1	2	101.9	8.22	YES
530372904	WDR48	PREDICTED: WD repeat-containing protein 48 isoform X1	Endosome	Cell communication	Molecular function unknown	1	4	79.2	7.06	YES
530373860	PDCD10	PREDICTED: programmed cell death protein 10 isoform X1	-	Apoptosis	Molecular function unknown	2	6	24.7	8.19	YES
530374184	DNAJC13	PREDICTED: dnaJ homolog subfamily C member 13 isoform X1	Endosome	Biological_process unknown	Molecular function unknown	1	2	254.9	6.74	YES
530374534	HRG	PREDICTED: histidine-rich glycoprotein isoform X1	Extracellular	Apoptosis	Binding	4	20	60.5	7.44	YES
530374672	CD200	PREDICTED: OX-2 membrane glycoprotein isoform X1	Plasma membrane	Immune response	Immunoglobulin receptor activity	4	12	33.9	8.66	YES
530376799	EXOC1	PREDICTED: exocyst complex component 1 isoform X1	Cytoplasm	Transport	Transporter activity	1	2	104.1	6.67	YES
530376993	PF4	PREDICTED: platelet factor 4 isoform X1	Extracellular	Immune response	Chemokine activity	1	4	11.7	7.17	YES
530378682	NADK2	PREDICTED: NAD kinase 2, mitochondrial isoform X1	-	-	-	2	4	51.9	8.43	YES
530379631	BRD8	PREDICTED: bromodomain-containing protein 8 isoform X1	Nucleus	Signal transduction	Transcription regulator activity	1	1	142.7	4.63	YES
530380011	ERAP1	PREDICTED: endoplasmic reticulum aminopeptidase 1 isoform X1	Endoplasmic reticulum	Protein metabolism	Aminopeptidase activity	1	2	108.3	6.57	YES
530380347	GNPDA1	PREDICTED: glucosamine-6-phosphate isomerase 1 isoform X1	-	Metabolism	Deaminase activity	1	2	36.1	7.61	YES
530380520	ANXA6	PREDICTED: annexin A6 isoform X1	Endoplasmic reticulum	Cell communication	Calcium ion binding	1	477	75.2	5.67	YES
530380562	PCDH1	PREDICTED: protocadherin-1 isoform X1	Plasma membrane	Cell adhesion	Cell adhesion molecule activity	1	2	138.7	5.17	YES
530381015	HNRNPH1	PREDICTED: heterogeneous nuclear ribonucleoprotein H isoform X1	Nucleus	Regulation of nucleobase, nucleoside, nucleotide and nucleic acid metabolism	Ribonucleoprotein	3	50	51.2	6.8	YES
530381322	FLOT1	PREDICTED: flotillin-1 isoform X1	Plasma membrane	Cell growth and/or maintenance	Molecular function unknown	1	2	47.3	7.49	YES
530381804	GNL1	PREDICTED: guanine nucleotide-binding protein-like 1 isoform X1	Nucleus	Cell communication	Molecular function unknown	2	6	68.6	5.8	YES
530382073	MUT	PREDICTED: methylmalonyl-CoA mutase, mitochondrial isoform X1	Mitochondrion	Metabolism	Catalytic activity	5	14	83.1	6.93	YES
530382523	VARS	PREDICTED: valine--tRNA ligase isoform X1	-	Metabolism	Ligase activity	3	5	140.5	7.59	YES
530384720	HNRNPA2B1	PREDICTED: heterogeneous nuclear ribonucleoproteins A2/B1 isoform X1	Nucleus	Regulation of nucleobase, nucleoside, nucleotide and nucleic acid metabolism	Transcription factor binding	15	106	37.4	8.95	YES
530384793	OGDH	PREDICTED: 2-oxoglutarate dehydrogenase, mitochondrial isoform X1	Mitochondrion	Metabolism	Catalytic activity	19	68	117.6	6.92	YES
530386029	SRRT	PREDICTED: serrate RNA effector molecule homolog isoform X1	Nucleus	Biological_process unknown	Molecular function unknown	1	2	101.3	5.96	YES
530386233	ZC3HAV1	PREDICTED: zinc finger CCCH-type antiviral protein 1 isoform X1	Cytoplasm	Immune response	Defense/immunity protein activity	1	4	114	8.56	YES
530389143	PLEC	PREDICTED: plectin isoform X3	-	-	-	63	292	532.1	5.97	YES
530390646	DNM1	PREDICTED: dynamin-1 isoform X1	Endocytic vesicle	Cell communication	GTPase activity	3	168	97.6	7.34	YES
530391028	GSN	PREDICTED: gelsolin isoform X5	Cytoplasm	Cell growth and/or maintenance	Structural constituent of cytoskeleton	25	218	80.6	5.85	YES
530392189	PFKP	PREDICTED: ATP-dependent 6-phosphofructokinase, platelet type isoform X1	Cytoplasm	Metabolism	Catalytic activity	19	84	90.8	7.11	YES
530392455	THNSL1	PREDICTED: threonine synthase-like 1 isoform X1	-	Biological_process unknown	Molecular function unknown	2	4	83	7.12	YES
530392883	ERLIN1	PREDICTED: erlin-1 isoform X1	Plasma membrane	Biological_process unknown	Molecular function unknown	1	18	39.1	7.87	YES
530393366	HSPA12A	PREDICTED: heat shock 70 kDa protein 12A isoform X1	-	Protein folding	Heat shock protein activity	17	66	77	7.17	YES
530393410	MYOF	PREDICTED: myoferlin isoform X1	Plasma membrane	Cell growth and/or maintenance	Molecular function unknown	2	9	236.5	6.24	YES
530393508	ANXA11	PREDICTED: annexin A11 isoform X1	Cytoplasm	Signal transduction	Calcium ion binding	5	10	65.6	8.27	YES
530395167	SIRT3	PREDICTED: NAD-dependent protein deacetylase sirtuin-3, mitochondrial isoform X1	Mitochondrion	Gene silencing	Deacetylase activity	1	2	45.5	8.4	YES
530395258	OLFML1	PREDICTED: olfactomedin-like protein 1 isoform X1	-	Biological_process unknown	Molecular function unknown	2	13	45.9	8.09	YES
530396004	CD44	PREDICTED: CD44 antigen isoform X1	Plasma membrane	Cell communication	Receptor activity	1	2	81.6	5.33	YES
530396298	CPT1A	PREDICTED: carnitine O-palmitoyltransferase 1, liver isoform isoform X1	Mitochondrial membrane	Mitochondrial transport	Palmitoyltransferase activity	4	8	91.8	8.5	YES
530396634	KCTD21	PREDICTED: BTB/POZ domain-containing protein KCTD21 isoform X1	-	Biological_process unknown	Molecular function unknown	1	4	37	8.43	YES
530396663	MACROD1	PREDICTED: O-acetyl-ADP-ribose deacetylase MACROD1 isoform X1	Mitochondrion	Regulation of nucleobase, nucleoside, nucleotide and nucleic acid metabolism	Molecular function unknown	1	2	36.4	9.51	YES
530396820	NDUFS8	PREDICTED: NADH dehydrogenase [ubiquinone] iron-sulfur protein 8, mitochondrial isoform X1	Mitochondrion	Metabolism	Oxidoreductase activity	1	2	23.7	6.34	YES
530397279	AHNAK	PREDICTED: neuroblast differentiation-associated protein AHNAK isoform X1	Plasma membrane	Muscle contraction	Protein binding	17	53	628.7	6.15	YES
530398460	UBASH3B	PREDICTED: ubiquitin-associated and SH3 domain-containing protein B isoform X1	-	Cell communication	Molecular function unknown	2	4	75.5	6.57	YES
530398666	COPS7A	PREDICTED: COP9 signalosome complex subunit 7a isoform X1	Nucleus	Regulation of nucleobase, nucleoside, nucleotide and nucleic acid metabolism	Transcription regulator activity	2	6	30.3	8.22	YES
530399626	OS9	PREDICTED: protein OS-9 isoform X1	Nucleus	Biological_process unknown	Molecular function unknown	1	2	75.6	4.87	YES
530399862	DCN	PREDICTED: decorin isoform X1	Extracellular	Cell growth and/or maintenance	Extracellular matrix structural constituent	14	109	39.7	8.54	YES
530400118	TBK1	PREDICTED: serine/threonine-protein kinase TBK1 isoform X1	Cytoplasm	Cell communication	Protein serine/threonine kinase activity	1	2	83.6	6.79	YES
530400464	PFKM	PREDICTED: ATP-dependent 6-phosphofructokinase, muscle type isoform X1	-	Metabolism	Catalytic activity	17	77	96.8	8.12	YES
530400534	KIF21A	PREDICTED: kinesin-like protein KIF21A isoform X1	Cytoplasm	Cell growth and/or maintenance	Motor activity	6	17	187.2	6.42	YES
530402140	ESD	PREDICTED: S-formylglutathione hydrolase isoform X1	Cytoplasm	Metabolism	Hydrolase activity	6	36	31.4	7.02	YES
530402210	SPG20	PREDICTED: spartin isoform X1	Cytoplasm	Transport	Molecular function unknown	1	2	72.8	5.91	YES
530402792	DCLK1	PREDICTED: serine/threonine-protein kinase DCLK1 isoform X1	Plasma membrane	Cell communication	Protein serine/threonine kinase activity	4	22	82.2	8.66	YES
530402948	SEC23A	PREDICTED: protein transport protein Sec23A isoform X1	Cytoplasm	Transport	Transporter activity	4	8	88.9	7.31	YES
530403248	NID2	PREDICTED: nidogen-2 isoform X1	Extracellular	Cell growth and/or maintenance	Extracellular matrix structural constituent	21	78	154.2	5.26	YES
530403303	DAAM1	PREDICTED: disheveled-associated activator of morphogenesis 1 isoform X1	Cytoplasm	Cell communication	Molecular function unknown	1	2	123.4	7.23	YES
530404106	PPP2R5C	PREDICTED: serine/threonine-protein phosphatase 2A 56 kDa regulatory subunit gamma isoform isoform X1	Chromosome	Cell communication	Phosphatase regulator activity	1	2	67.6	7.97	YES
530404534	SPTB	PREDICTED: spectrin beta chain, erythrocytic isoform X1	Plasma membrane	Cell growth and/or maintenance	Structural molecule activity	4	16	267.7	5.39	YES
530404919	NEK9	PREDICTED: serine/threonine-protein kinase Nek9 isoform X1	Cytoplasm	Cell growth and/or maintenance	Kinase activity	1	2	108.4	5.85	YES
530404957	CDC42BPB	PREDICTED: serine/threonine-protein kinase MRCK beta isoform X1	Cytoplasm	Cell communication	Protein serine/threonine kinase activity	1	2	196	6.27	YES
530405580	DMXL2	PREDICTED: dmX-like protein 2 isoform X1	Cytoplasmic vesicle	Cell growth and/or maintenance	Structural molecule activity	8	24	341.9	6.34	YES
530406197	B2M	PREDICTED: beta-2-microglobulin isoform X1	Extracellular	Immune response	MHC class I receptor activity	2	12	14	7.44	YES
530406538	TLN2	PREDICTED: talin-2 isoform X1	Plasma membrane	Cell growth and/or maintenance	Cytoskeletal protein binding	10	40	273	5.58	YES
530409932	TOM1L2	PREDICTED: TOM1-like protein 2 isoform X1	-	Transport	Transporter activity	1	8	58.7	4.79	YES
530410596	VAMP2	PREDICTED: vesicle-associated membrane protein 2 isoform X1	Plasma membrane	Transport	Auxiliary transport protein activity	2	14	12.9	8.13	YES
530410969	ALDOC	PREDICTED: fructose-bisphosphate aldolase C isoform X1	Mitochondrion	Metabolism	Lyase activity	15	70	39.4	6.87	YES
530410971	FLOT2	PREDICTED: flotillin-2 isoform X1	Plasma membrane	Cell communication	Cell adhesion molecule activity	2	6	47.1	5.31	YES
530411336	ABCA8	PREDICTED: ATP-binding cassette sub-family A member 8 isoform X1	-	Transport	Auxiliary transport protein activity	4	8	183.6	7.25	YES
530411491	CLTC	PREDICTED: clathrin heavy chain 1 isoform X1	Cytoplasm	Cell growth and/or maintenance	Structural molecule activity	71	706	192.3	5.69	YES
530412176	KRT10	PREDICTED: keratin, type I cytoskeletal 10 isoform X1	Cytoplasm	Cell growth and/or maintenance	Structural molecule activity	20	262	63.3	5.26	YES
530412235	MAPT	PREDICTED: microtubule-associated protein tau isoform X8	Cytoplasm	Cell growth and/or maintenance	Structural molecule activity	3	14	49.8	9.26	YES
530412417	ATP6V0A1	PREDICTED: V-type proton ATPase 116 kDa subunit a isoform X1	Brush border	Transport	Ion channel activity	15	107	97.2	6.43	YES
530413484	GPS1	PREDICTED: COP9 signalosome complex subunit 1 isoform X2	Nucleus	Cell communication	Signal transducer activity	6	12	65	6.28	YES
530414456	ILVBL	PREDICTED: acetolactate synthase-like protein isoform X1	-	Metabolism	Coenzyme binding	1	2	67.8	8.15	YES
530415036	SLC44A2	PREDICTED: choline transporter-like protein 2 isoform X1	Integral to membrane	Cell communication	Signal transducer activity	4	14	80.7	8.21	YES
530415584	HNRNPUL1	PREDICTED: heterogeneous nuclear ribonucleoprotein U-like protein 1 isoform X1	Cytoplasm	RNA metabolism	RNA binding	1	2	96.8	6.92	YES
530415704	IRGQ	PREDICTED: immunity-related GTPase family Q protein isoform X1	-	Biological_process unknown	Molecular function unknown	2	3	62.7	4.88	YES
530416104	PLD3	PREDICTED: phospholipase D3 isoform X1	Golgi apparatus	Metabolism	Phospholipase activity	1	2	54.7	6.47	YES
530416193	CHMP2A	PREDICTED: charged multivesicular body protein 2a isoform X1	Cytoplasm	Transport	Transporter activity	1	2	29.6	6	YES
530416229	GPI	PREDICTED: glucose-6-phosphate isomerase isoform X2	Cytoplasm	Metabolism	Isomerase activity	24	165	63.1	8.32	YES
530417335	CAPNS1	PREDICTED: calpain small subunit 1 isoform X1	Cytoplasm	Protein folding	Peptide binding	4	14	33.8	6.23	YES
530417532	PDCD5	PREDICTED: programmed cell death protein 5 isoform X1	Nucleus	Apoptosis	Molecular function unknown	1	1	15	6.93	YES
530420276	RANGAP1	PREDICTED: ran GTPase-activating protein 1 isoform X1	Cytoplasm	Cell communication	GTPase activator activity	1	2	69.5	4.81	YES
530423013	ASMTL	PREDICTED: N-acetylserotonin O-methyltransferase-like protein isoform X1	Cytoplasm	Metabolism	Acyltransferase activity	3	10	68.8	6.07	YES
530424091	VAC14	PREDICTED: protein VAC14 homolog isoform X1	Microsome	Biological_process unknown	Molecular function unknown	4	7	88.6	6.28	YES
530424405	HSDL1	PREDICTED: inactive hydroxysteroid dehydrogenase-like protein 1 isoform X1	-	Metabolism	Catalytic activity	1	2	37	8.72	YES
530424559	NUP93	PREDICTED: nuclear pore complex protein Nup93 isoform X1	Nucleus	Transport	Auxiliary transport protein activity	2	6	93.4	5.72	YES
530425257	PALM	PREDICTED: paralemmin-1 isoform X1	Plasma membrane	Biological_process unknown	Molecular function unknown	4	8	42.3	5.06	YES
530425325	PTBP1	PREDICTED: polypyrimidine tract-binding protein 1 isoform X1	Nucleus	Regulation of nucleobase, nucleoside, nucleotide and nucleic acid metabolism	Ribonucleoprotein	9	36	59.8	9.31	YES
530425477	KHSRP	PREDICTED: far upstream element-binding protein 2 isoform X1	Nucleus	Regulation of nucleobase, nucleoside, nucleotide and nucleic acid metabolism	Transcription regulator activity	3	12	76.6	7.33	YES
530425723	IDH3B	PREDICTED: isocitrate dehydrogenase [NAD] subunit beta, mitochondrial isoform X1	Mitochondrion	Metabolism	Catalytic activity	8	24	42.4	8.46	YES
530426726	DPP7	PREDICTED: dipeptidyl peptidase 2 isoform X1	Cytoplasm	Protein metabolism	Serine-type peptidase activity	4	10	61.8	7.87	YES
530427319	CTBP1	PREDICTED: C-terminal-binding protein 1 isoform X1	Nucleus	Regulation of nucleobase, nucleoside, nucleotide and nucleic acid metabolism	Transcription regulator activity	5	10	47.6	6.77	YES
530429121	HLA-A	PREDICTED: HLA class I histocompatibility antigen, A-1 alpha chain isoform X2	Plasma membrane	Immune response	MHC class I receptor activity	6	30	44	6.64	YES
538917681	IDH1	isocitrate dehydrogenase [NADP] cytoplasmic	Cytoplasm	Metabolism	Catalytic activity	5	18	46.6	7.01	YES
540344518	EHD1	EH domain-containing protein 1 isoform 2	Plasma membrane	Cell communication	Calcium ion binding	7	16	61.9	6.71	YES
543583768	H6PD	GDH/6PGL endoplasmic bifunctional protein isoform 1	Endoplasmic reticulum	Metabolism	Catalytic activity	4	8	90.1	7.23	YES
544186032	PDIA6	protein disulfide-isomerase A6 isoform a	Endoplasmic reticulum	Protein metabolism	Isomerase activity	11	72	53.9	5.33	YES
545688329	NAPB	beta-soluble NSF attachment protein isoform a	Integral to membrane	Transport	Molecular function unknown	3	12	33.9	5.47	YES
547235570	FKBP9	peptidyl-prolyl cis-trans isomerase FKBP9 isoform 2	Endoplasmic reticulum	Protein metabolism	Chaperone activity	3	8	69.1	5.31	YES
554506556	ACADM	medium-chain specific acyl-CoA dehydrogenase, mitochondrial isoform d	Mitochondrion	Metabolism	Catalytic activity	7	26	50.2	7.8	YES
555943903	TPT1	translationally-controlled tumor protein isoform 1	Nucleus	Cell growth and/or maintenance	Calcium ion binding	2	4	22.6	5.24	YES
555943918	HMOX2	heme oxygenase 2 isoform a	Endoplasmic reticulum	Metabolism	Catalytic activity	2	3	41.6	5.44	YES
557357733	HSPH1	heat shock protein 105 kDa isoform 3	Cytoplasm	Protein metabolism	Heat shock protein activity	13	61	97.4	5.72	YES
557357751	NAE1	NEDD8-activating enzyme E1 regulatory subunit isoform d	Cytoplasm	Cell communication	Receptor signaling complex scaffold activity	2	4	60.5	5.4	YES
557878647	UFM1	ubiquitin-fold modifier 1 isoform 3	-	Biological_process unknown	Molecular function unknown	1	2	11	8.59	YES
557948093	MRPS27	28S ribosomal protein S27, mitochondrial isoform 1	Mitochondrion	Protein metabolism	Structural constituent of ribosome	1	2	49.1	6.33	YES
558472848	FARP1	FERM, RhoGEF and pleckstrin domain-containing protein 1 isoform 3	-	Cell growth and/or maintenance	Guanyl-nucleotide exchange factor activity	2	4	122	8.48	YES
559098444	SH3GLB2	endophilin-B2 isoform a	Cytoplasm	Biological_process unknown	Molecular function unknown	4	14	44.7	5.57	YES
560575997	TPD52	tumor protein D52 isoform 4	-	Cell proliferation	Molecular function unknown	2	4	26.9	5.11	YES
565324201	PHPT1	14 kDa phosphohistidine phosphatase isoform 4	Cytoplasm	Biological_process unknown	Phosphoprotein phosphatase activity	3	6	14	5.77	YES
567757609	CLIC1	chloride intracellular channel protein 1	Cytoplasm	Transport	Intracellular ligand-gated ion channel activity	6	13	26.9	5.17	YES
574280236	PRKCSH	glucosidase 2 subunit beta isoform 3	Endoplasmic reticulum	Energy pathways	Glucosidase activity	5	12	60.2	4.41	YES
574584816	TUBB4A	tubulin beta-4A chain isoform 3	-	-	-	6	2144	49.6	4.88	YES
576583524	GAPDH	glyceraldehyde-3-phosphate dehydrogenase isoform 1	Cytoplasm	Metabolism	Catalytic activity	26	627	36	8.46	YES
578799084	KCND3	PREDICTED: potassium voltage-gated channel subfamily D member 3 isoform X1	Plasma membrane	Ion transport	Voltage-gated ion channel activity	1	1	73.4	8.25	YES
578799206	SH3GLB1	PREDICTED: endophilin-B1 isoform X1	Cytoplasm	Metabolism	Acyltransferase activity	2	6	45.2	6.21	YES
578799525	PTPRF	PREDICTED: receptor-type tyrosine-protein phosphatase F isoform X3	Plasma membrane	Cell communication	Receptor signaling protein tyrosine phosphatase activity	2	3	213.1	6.38	YES
578799563	SARS	PREDICTED: serine--tRNA ligase, cytoplasmic isoform X1	Mitochondrion	Metabolism	Ligase activity	5	11	61.3	7.06	YES
578801211	GOLPH3L	PREDICTED: Golgi phosphoprotein 3-like isoform X1	-	Biological_process unknown	Molecular function unknown	1	2	34.4	6.98	YES
578801390	TROVE2	PREDICTED: 60 kDa SS-A/Ro ribonucleoprotein isoform X1	Cytoplasm	Regulation of nucleobase, nucleoside, nucleotide and nucleic acid metabolism	RNA binding	1	2	63.1	8.38	YES
578804201	HDLBP	PREDICTED: vigilin isoform X1	Nucleus	Transport	Transporter activity	3	7	141.4	6.87	YES
578804211	AGFG1	PREDICTED: arf-GAP domain and FG repeat-containing protein 1 isoform X1	Nucleus	Regulation of nucleobase, nucleoside, nucleotide and nucleic acid metabolism	RNA binding	1	2	62.6	8.56	YES
578804263	INPP4A	PREDICTED: type I inositol 3,4-bisphosphate 4-phosphatase isoform X1	Cytoplasm	Metabolism	Hydrolase activity	2	4	111.6	6.87	YES
578806039	IMPDH2	PREDICTED: inosine-5'-monophosphate dehydrogenase 2 isoform X1	Cytosol	Metabolism	Catalytic activity	6	16	66.1	8.5	YES
578806081	MAP4	PREDICTED: microtubule-associated protein 4 isoform X5	Cytoplasm	Cell growth and/or maintenance	Cytoskeletal protein binding	1	2	248.2	6.23	YES
578806985	TFG	PREDICTED: protein TFG isoform X1	Cytoplasm	Signal transduction	Receptor regulator activity	4	8	43.4	5.1	YES
578808728	PDLIM5	PREDICTED: PDZ and LIM domain protein 5 isoform X6	Cytoplasm	Cell communication	Receptor signaling complex scaffold activity	9	32	65.1	8.4	YES
578808960	TRIM2	PREDICTED: tripartite motif-containing protein 2 isoform X1	Cytoplasm	Biological_process unknown	Molecular function unknown	7	22	84.9	7.37	YES
578809567	CBR4	PREDICTED: carbonyl reductase family member 4 isoform X1	-	Biological_process unknown	Molecular function unknown	1	2	26.6	9.64	YES
578812747	LAMA4	PREDICTED: laminin subunit alpha-4 isoform X1	Extracellular	Cell growth and/or maintenance	Cell adhesion molecule activity	6	23	202.4	6.25	YES
578813708	ELMO1	PREDICTED: engulfment and cell motility protein 1 isoform X1	Cytoplasm	Cytoskeleton organization and biogenesis	Protein domain specific binding	3	6	83.8	6.28	YES
578813710	SEPT7	PREDICTED: septin-7 isoform X2	Cytoskeleton	Cell communication	Protein binding	14	80	52	8.73	YES
578813864	SLC25A13	PREDICTED: calcium-binding mitochondrial carrier protein Aralar2 isoform X1	Mitochondrion	Transport	Carrier activity	9	56	75.4	8.5	YES
578815184	CLU	PREDICTED: clusterin isoform X1	Extracellular	Immune response	Complement activity	12	111	57.8	6.68	YES
578816162	COL14A1	PREDICTED: collagen alpha-1(XIV) chain isoform X1	Extracellular	Cell growth and/or maintenance	Extracellular matrix structural constituent	17	78	193.4	5.3	YES
578817145	DNM1	PREDICTED: dynamin-1 isoform X2	Endocytic vesicle	Cell communication	GTPase activity	2	164	97.5	7.01	YES
578817242	SLC44A1	PREDICTED: choline transporter-like protein 1 isoform X1	Integral to membrane	Transport	Molecular function unknown	3	8	82.9	8.21	YES
578817327	OSTF1	PREDICTED: osteoclast-stimulating factor 1 isoform X1	Nucleus	Cell communication	Receptor signaling complex scaffold activity	1	2	24	5.5	YES
578817803	SPTAN1	PREDICTED: spectrin alpha chain, non-erythrocytic 1 isoform X5	Cytoplasm	Cell growth and/or maintenance	Structural constituent of cytoskeleton	135	984	286.4	5.4	YES
578819694	LHPP	PREDICTED: phospholysine phosphohistidine inorganic pyrophosphate phosphatase isoform X3	-	Biological_process unknown	Molecular function unknown	2	4	31.5	5.41	YES
578821294	GNG3	PREDICTED: guanine nucleotide-binding protein G(I)/G(S)/G(O) subunit gamma-3 isoform X1	-	Cell communication	GTPase activity	1	2	8.3	7.78	YES
578821687	SPTBN2	PREDICTED: spectrin beta chain, non-erythrocytic 2 isoform X1	Plasma membrane	Cell growth and/or maintenance	Cytoskeletal protein binding	3	51	271.5	6.23	YES
578821804	PPFIA1	PREDICTED: liprin-alpha-1 isoform X1	Cytoplasm	Cell growth and/or maintenance	Cytoskeletal anchoring activity	1	2	147	6.28	YES
578822814	A2M	PREDICTED: alpha-2-macroglobulin isoform X1	Extracellular	Protein metabolism	Protease inhibitor activity	14	51	167.4	6.76	YES
578823762	NACA	PREDICTED: nascent polypeptide-associated complex subunit alpha isoform X1	Nucleus	Protein metabolism	Chaperone activity	1	2	205.6	9.6	YES
578824045	PTPN11	PREDICTED: tyrosine-protein phosphatase non-receptor type 11 isoform X1	Cytoplasm	Cell communication	Protein tyrosine phosphatase activity	4	10	68.4	7.3	YES
578824140	TBC1D15	PREDICTED: TBC1 domain family member 15 isoform X1	-	Cell communication	GTPase activator activity	1	2	80.6	5.6	YES
578824836	NBEA	PREDICTED: neurobeachin isoform X1	Golgi apparatus	Cell growth and/or maintenance	Cytoskeletal anchoring activity	1	2	330.2	6.19	YES
578825277	ARHGEF7	PREDICTED: rho guanine nucleotide exchange factor 7 isoform X1	Cytoplasm	Regulation of signal transduction	Molecular function unknown	1	6	91.8	7.24	YES
578825426	FERMT2	PREDICTED: fermitin family homolog 2 isoform X1	Plasma membrane	Cell growth and/or maintenance	Structural constituent of cytoskeleton	2	4	80.7	6.95	YES
578826688	SCAMP5	PREDICTED: secretory carrier-associated membrane protein 5 isoform X1	Cytoplasmic vesicle	Transport	Transporter activity	2	4	28	8.81	YES
578828264	ROGDI	PREDICTED: protein rogdi homolog isoform X1	-	Biological_process unknown	Molecular function unknown	5	10	32.9	7.88	YES
578829153	NDRG4	PREDICTED: protein NDRG4 isoform X7	Cytoplasm	Cell differentiation	Hydrolase activity	2	12	47.2	6.2	YES
578831479	COASY	PREDICTED: bifunctional coenzyme A synthase isoform X4	Cytoplasm	Metabolism	Transferase activity	4	8	65.3	7.64	YES
578832785	TXNL1	PREDICTED: thioredoxin-like protein 1 isoform X1	Cytoplasm	Metabolism	Oxidoreductase activity	2	4	32.7	5.07	YES
578832955	PGLYRP2	PREDICTED: N-acetylmuramoyl-L-alanine amidase isoform X1	Extracellular	Immune response	Receptor activity	1	2	68	7.68	YES
578833819	SAE1	PREDICTED: SUMO-activating enzyme subunit 1 isoform X1	Nucleus	Metabolism	Ligase activity	1	4	41.1	6.07	YES
578834952	ACTN4	PREDICTED: alpha-actinin-4 isoform X1	Cytoplasm	Cell growth and/or maintenance	Structural constituent of cytoskeleton	2	196	104.8	5.44	YES
578835999	LAMA5	PREDICTED: laminin subunit alpha-5 isoform X1	Extracellular	Cell growth and/or maintenance	Cell adhesion molecule activity	14	56	399.9	7.02	YES
578836508	GART	PREDICTED: trifunctional purine biosynthetic protein adenosine-3 isoform X1	Cytosol	Regulation of nucleobase, nucleoside, nucleotide and nucleic acid metabolism	Ligase activity	6	15	107.7	6.7	YES
578837207	ARVCF	PREDICTED: armadillo repeat protein deleted in velo-cardio-facial syndrome isoform X1	Plasma membrane	Cell growth and/or maintenance	Molecular function unknown	1	2	109.8	8.03	YES
578837252	EIF3L	PREDICTED: eukaryotic translation initiation factor 3 subunit L isoform X1	Cytoplasm	Protein metabolism	Translation regulator activity	2	6	67.5	6.55	YES
578837829	DMD	PREDICTED: dystrophin isoform X1	Cytoplasm	Cell growth and/or maintenance	Structural molecule activity	1	2	428.3	5.83	YES
578838653	FHL1	PREDICTED: four and a half LIM domains protein 1 isoform X3	Cytoplasm	Cell growth and/or maintenance	Molecular function unknown	12	42	31.9	8.32	YES
586798211	USO1	general vesicular transport factor p115 isoform 1	Golgi apparatus	Transport	Transporter activity	4	12	109.1	4.89	YES
589269122	MYADM	myeloid-associated differentiation marker	-	Biological_process unknown	Molecular function unknown	1	5	35.3	8.15	YES
604723356	NDUFA5	NADH dehydrogenase [ubiquinone] 1 alpha subcomplex subunit 5 isoform 6	Mitochondrion	Metabolism	Oxidoreductase activity	1	4	21.2	9.01	YES
614458221	PCK2	phosphoenolpyruvate carboxykinase [GTP], mitochondrial isoform 1	Mitochondrion	Metabolism	Catalytic activity	2	6	70.7	7.62	YES
618857509	MANF	mesencephalic astrocyte-derived neurotrophic factor	Cytoplasm	Biological_process unknown	Molecular function unknown	1	2	21.1	8.92	YES
634743231	PTPRK	receptor-type tyrosine-protein phosphatase kappa isoform c	Plasma membrane	Cell communication	Receptor signaling protein tyrosine kinase activity	1	2	164.5	5.83	YES
662033833	RPA2	replication protein A 32 kDa subunit isoform 3	Nucleus	Regulation of nucleobase, nucleoside, nucleotide and nucleic acid metabolism	DNA binding	1	2	30.1	6.96	YES
662033925	PEA15	astrocytic phosphoprotein PEA-15 isoform b	Cytoplasm	Cell communication	Transporter activity	3	7	15	5.02	YES
663071149	TBCA	tubulin-specific chaperone A isoform 1	Cytoskeleton	Protein metabolism	Chaperone activity	2	4	15.8	9.35	YES
663429515	LYPLAL1	lysophospholipase-like protein 1 isoform a	-	Biological_process unknown	Molecular function unknown	4	9	26.3	7.84	YES
663853723	KIF3A	kinesin-like protein KIF3A isoform 1	Cytoplasm	Cell growth and/or maintenance	Motor activity	1	2	82.7	6.44	YES
664805999	EIF4B	eukaryotic translation initiation factor 4B isoform 1	Cytoplasm	Protein metabolism	Translation regulator activity	1	2	69.7	5.67	YES
664806037	CIRBP	cold-inducible RNA-binding protein isoform 3	Nucleus	Cell communication	RNA binding	1	1	31.9	9.61	YES
669174630	N6AMT1	hemK methyltransferase family member 2 isoform 1	-	Biological_process unknown	Molecular function unknown	1	2	22.9	5.11	YES
705044002	APOE	apolipoprotein E isoform a	Cytoplasm	Transport	Transporter activity	3	6	39	6.24	YES
729042247	AIP	AH receptor-interacting protein isoform 1	Cytoplasm	Regulation of nucleobase, nucleoside, nucleotide and nucleic acid metabolism	Transcription regulator activity	1	2	37.6	6.42	YES
731441427	DDAH2	N(G),N(G)-dimethylarginine dimethylaminohydrolase 2	Cytoplasm	Metabolism	Hydrolase activity	15	66	29.6	6.01	YES
733215420	MPP6	MAGUK p55 subfamily member 6	Plasma membrane	Cell communication	Molecular function unknown	1	2	61.1	6.18	YES
733216030	PANK4	pantothenate kinase 4	-	Metabolism	Catalytic activity	6	12	86.9	6.34	YES
734520330	COL4A1	collagen alpha-1(IV) chain isoform 1 preproprotein	Extracellular	Cell growth and/or maintenance	Extracellular matrix structural constituent	4	24	160.5	8.28	YES
735367775	ITGB2	integrin beta-2 isoform 1	Plasma membrane	Cell communication	Cell adhesion molecule activity	1	2	84.7	6.98	YES
735997384	WDR61	WD repeat-containing protein 61 isoform a	-	Biological_process unknown	Molecular function unknown	2	6	33.6	5.47	YES
740086846	ACLY	ATP-citrate synthase isoform 3	Cytoplasm	Metabolism	ATPase activity	39	230	126.1	8.18	YES
746816135	VBP1	prefoldin subunit 3 isoform 2	Cytoplasm	Protein metabolism	Chaperone activity	1	2	26.5	9.01	YES
746817426	RPL10	60S ribosomal protein L10 isoform b	Cytoplasm	Protein metabolism	Structural constituent of ribosome	1	2	24.1	9.72	YES
747165389	RPSA	40S ribosomal protein SA isoform 2	Cytoplasm	Cell communication	Cell adhesion molecule activity	8	39	33.3	4.87	YES
748585205	PRKACA	cAMP-dependent protein kinase catalytic subunit alpha isoform 3	Golgi apparatus	Signal transduction	Protein serine/threonine kinase activity	2	12	49.1	8.46	YES
751247014	TIMM9	mitochondrial import inner membrane translocase subunit Tim9 isoform a	Mitochondrial membrane	Cell growth and/or maintenance	Transporter activity	1	2	10.4	7.21	YES
751368084	HDHD3	haloacid dehalogenase-like hydrolase domain-containing protein 3	-	Metabolism	Hydrolase activity	3	8	28	6.71	YES
767902514	CRYZ	PREDICTED: quinone oxidoreductase isoform X1	Cytoplasm	Metabolism	Oxidoreductase activity	4	18	35.2	8.44	YES
767903202	WDR47	PREDICTED: WD repeat-containing protein 47 isoform X1	-	Cell communication	Molecular function unknown	1	2	103.1	6.04	YES
767903406	UBR4	PREDICTED: E3 ubiquitin-protein ligase UBR4 isoform X1	Cytoplasm	Biological_process unknown	Molecular function unknown	1	2	578.9	6	YES
767903710	PHGDH	PREDICTED: D-3-phosphoglycerate dehydrogenase isoform X1	Extracellular	Metabolism	Catalytic activity	6	11	64.7	6.87	YES
767903957	HSPG2	PREDICTED: basement membrane-specific heparan sulfate proteoglycan core protein isoform X1	Extracellular	Cell growth and/or maintenance	Extracellular matrix structural constituent	61	292	488.2	6.55	YES
767905372	ABCD3	PREDICTED: ATP-binding cassette sub-family D member 3 isoform X1	Peroxisome	Transport	ATP binding	1	2	78.4	9.16	YES
767905752	SLC16A1	PREDICTED: monocarboxylate transporter 1 isoform X1	Plasma membrane	Transport	Auxiliary transport protein activity	1	4	53.9	8.66	YES
767906235	CAPZB	PREDICTED: F-actin-capping protein subunit beta isoform X1	Cytoskeleton	Cell growth and/or maintenance	Structural constituent of cytoskeleton	8	22	34.5	5.96	YES
767906494	DOCK7	PREDICTED: dedicator of cytokinesis protein 7 isoform X1	-	Cell communication	Guanyl-nucleotide exchange factor activity	1	1	242.4	6.8	YES
767906645	FUBP1	PREDICTED: far upstream element-binding protein 1 isoform X1	Nucleus	Regulation of nucleobase, nucleoside, nucleotide and nucleic acid metabolism	Transcription regulator activity	3	10	72.1	7.59	YES
767906852	CROCC	PREDICTED: rootletin isoform X1	Cytoplasm	Cell growth and/or maintenance	Structural molecule activity	3	9	228.7	5.53	YES
767908737	NFASC	PREDICTED: neurofascin isoform X10	Plasma membrane	Cell communication	Cell adhesion molecule activity	6	14	162.1	7.15	YES
767908955	TOR1AIP1	PREDICTED: torsin-1A-interacting protein 1 isoform X2	Nucleus	Biological_process unknown	Molecular function unknown	6	12	67.7	7.9	YES
767909532	PIGR	PREDICTED: polymeric immunoglobulin receptor isoform X1	Plasma membrane	Immune response	Receptor activity	7	30	83.2	5.74	YES
767909618	PPOX	PREDICTED: protoporphyrinogen oxidase isoform X1	Mitochondrion	Metabolism	Catalytic activity	3	11	60.6	9.36	YES
767910136	S100A13	PREDICTED: protein S100-A13 isoform X1	Nucleus	Cell communication	Calcium ion binding	1	2	11.5	6.16	YES
767910264	SPTA1	PREDICTED: spectrin alpha chain, erythrocytic 1 isoform X1	Plasma membrane	Cell growth and/or maintenance	Structural constituent of cytoskeleton	17	42	279.8	5.05	YES
767912068	LYST	PREDICTED: lysosomal-trafficking regulator isoform X1	Lysosome	Cell communication	Receptor signaling complex scaffold activity	1	1	434.5	6.64	YES
767912765	CDC42BPA	PREDICTED: serine/threonine-protein kinase MRCK alpha isoform X1	Cytoplasm	Cytoskeleton organization and biogenesis	Protein serine/threonine kinase activity	1	2	209.7	6.49	YES
767913321	TSSC1	PREDICTED: protein TSSC1 isoform X1	-	Biological_process unknown	Molecular function unknown	2	4	47.6	5.39	YES
767913845	CTNNA2	PREDICTED: catenin alpha-2 isoform X1	Cytoplasm	Cell growth and/or maintenance	Structural constituent of cytoskeleton	3	12	105.2	5.71	YES
767914416	HADHB	PREDICTED: trifunctional enzyme subunit beta, mitochondrial isoform X2	Mitochondrion	Metabolism	Catalytic activity	10	34	51.3	9.41	YES
767914900	EIF2AK2	PREDICTED: interferon-induced, double-stranded RNA-activated protein kinase isoform X1	Ribosome	Cell communication	Protein serine/threonine kinase activity	6	12	62.1	8.4	YES
767915282	CAPG	PREDICTED: macrophage-capping protein isoform X1	Cytoplasm	Cell growth and/or maintenance	Cytoskeletal protein binding	2	8	38.5	6.19	YES
767916582	COL6A3	PREDICTED: collagen alpha-3(VI) chain isoform X1	Extracellular	Cell growth and/or maintenance	Extracellular matrix structural constituent	1	567	343.4	6.68	YES
767917547	HIBCH	PREDICTED: 3-hydroxyisobutyryl-CoA hydrolase, mitochondrial isoform X1	Mitochondrion	Metabolism	Hydrolase activity	3	10	43.5	8.19	YES
767923834	PRKAR2A	PREDICTED: cAMP-dependent protein kinase type II-alpha regulatory subunit isoform X1	Cytoplasm	Cell communication	Protein serine/threonine kinase activity	12	60	45.5	5.07	YES
767924143	TKT	PREDICTED: transketolase isoform X1	Cytoplasm	Metabolism	Transferase activity, transferring aldehyde or ketonic groups	28	200	68.8	7.52	YES
767924544	LRRFIP2	PREDICTED: leucine-rich repeat flightless-interacting protein 2 isoform X1	Nucleus	Biological_process unknown	Molecular function unknown	1	2	82.1	6.95	YES
767924607	CACNA2D2	PREDICTED: voltage-dependent calcium channel subunit alpha-2/delta-2 isoform X1	Plasma membrane	Transport	Voltage-gated ion channel activity	1	2	129.9	5.8	YES
767924768	IQSEC1	PREDICTED: IQ motif and SEC7 domain-containing protein 1 isoform X1	-	Cell communication	Guanyl-nucleotide exchange factor activity	2	7	136	8.47	YES
767925606	MGLL	PREDICTED: monoglyceride lipase isoform X1	-	Lipid metabolism	Lipase activity	1	2	37.6	7.2	YES
767925751	CP	PREDICTED: ceruloplasmin isoform X1	Endoplasmic reticulum	Metabolism	Oxidoreductase activity	21	100	125.6	5.76	YES
767927354	BDH1	PREDICTED: D-beta-hydroxybutyrate dehydrogenase, mitochondrial isoform X1	Mitochondrial membrane	Fatty acid metabolism	Catalytic activity	2	9	38.8	8.19	YES
767927731	FXR1	PREDICTED: fragile X mental retardation syndrome-related protein 1 isoform X1	Cytoplasm	Regulation of translation	RNA binding	1	4	76.2	6.83	YES
767927897	GMPS	PREDICTED: GMP synthase [glutamine-hydrolyzing] isoform X1	-	Metabolism	Amidinotransferase activity	3	10	77.4	6.98	YES
767930167	ATP8A1	PREDICTED: phospholipid-transporting ATPase IA isoform X1	Integral to membrane	Transport	ATPase activity	9	32	132.2	6.74	YES
767931258	MMAA	PREDICTED: methylmalonic aciduria type A protein, mitochondrial isoform X1	Mitochondrion	Metabolism	ATPase activity	1	2	46.5	9.29	YES
767931419	RUFY3	PREDICTED: protein RUFY3 isoform X1	-	Biological_process unknown	Molecular function unknown	12	36	76	6.15	YES
767931464	PALLD	PREDICTED: palladin isoform X1	Cytoplasm	Cell growth and/or maintenance	Molecular function unknown	3	6	159.6	7.34	YES
767932074	COPS4	PREDICTED: COP9 signalosome complex subunit 4 isoform X1	-	Protein metabolism	Molecular function unknown	7	24	47.7	6.43	YES
767932239	BBS7	PREDICTED: Bardet-Biedl syndrome 7 protein isoform X1	-	Biological_process unknown	Molecular function unknown	2	4	82.2	6.11	YES
767935960	PAM	PREDICTED: peptidyl-glycine alpha-amidating monooxygenase isoform X1	Cytoplasm	Protein metabolism	Catalytic activity	7	27	110.5	6.47	YES
767936329	SIL1	PREDICTED: nucleotide exchange factor SIL1 isoform X1	Endoplasmic reticulum	Protein metabolism	Chaperone activity	1	2	53.2	5.25	YES
767937785	PDGFRB	PREDICTED: platelet-derived growth factor receptor beta isoform X1	Plasma membrane	Cell communication	Transmembrane receptor protein tyrosine kinase activity	1	4	123.9	4.98	YES
767938112	DBN1	PREDICTED: drebrin isoform X1	Cytoplasm	Cell growth and/or maintenance	Cytoskeletal protein binding	1	2	76.4	4.58	YES
767938662	CANX	PREDICTED: calnexin isoform X2	Endoplasmic reticulum	Protein folding	Chaperone activity	13	98	73.4	4.65	YES
767940188	SERPINB6	PREDICTED: serpin B6 isoform X1	Cytoplasm	Protein metabolism	Protease inhibitor activity	10	41	51.2	6.34	YES
767940377	PRL	PREDICTED: prolactin isoform X1	Extracellular	Cell communication	Hormone activity	6	112	25.9	6.98	YES
767941884	COL12A1	PREDICTED: collagen alpha-1(XII) chain isoform X1	Extracellular	Cell growth and/or maintenance	Extracellular matrix structural constituent	10	22	339.4	5.45	YES
767943517	UTRN	PREDICTED: utrophin isoform X1	Cytoplasm	Cell growth and/or maintenance	Cytoskeletal anchoring activity	1	2	398	5.34	YES
767943934	SNAP91	PREDICTED: clathrin coat assembly protein AP180 isoform X1	Cytoplasm	Cell communication	Receptor signaling complex scaffold activity	5	10	92.4	4.86	YES
767945335	DBNL	PREDICTED: drebrin-like protein isoform X1	Actin cytoskeleton	Signal transduction	Kinase regulator activity	1	4	48.9	5.05	YES
767945863	CAMK2B	PREDICTED: calcium/calmodulin-dependent protein kinase type II subunit beta isoform X1	Cytoplasm	Cell communication	Protein serine/threonine kinase activity	2	19	77.2	7.2	YES
767945997	EIF3B	PREDICTED: eukaryotic translation initiation factor 3 subunit B isoform X1	Ribosome	Protein metabolism	Translation regulator activity	5	16	92.4	5	YES
767946620	DNAJB6	PREDICTED: dnaJ homolog subfamily B member 6 isoform X1	Cytoplasm	Protein folding	Chaperone activity	1	2	36.6	7.18	YES
767947843	ACHE	PREDICTED: acetylcholinesterase isoform X1	Plasma membrane	Metabolism	Hydrolase activity	2	3	84.9	7.09	YES
767947911	NRCAM	PREDICTED: neuronal cell adhesion molecule isoform X1	Plasma membrane	Signal transduction	Cell adhesion molecule activity	3	6	144.6	5.71	YES
767948600	BPGM	PREDICTED: bisphosphoglycerate mutase isoform X1	-	Metabolism	Catalytic activity	4	10	30	6.54	YES
767948685	EIF4H	PREDICTED: eukaryotic translation initiation factor 4H isoform X1	Cytoplasm	Protein metabolism	Translation regulator activity	2	4	27.6	9.07	YES
767950710	KIF13B	PREDICTED: kinesin-like protein KIF13B isoform X1	Cytoplasm	Cell growth and/or maintenance	Motor activity	1	2	205.1	5.86	YES
767950781	ANK1	PREDICTED: ankyrin-1 isoform X1	Sarcoplasmic reticulum	Cell communication	Receptor signaling complex scaffold activity	1	2	216.1	6.38	YES
767951904	TCEB1	PREDICTED: transcription elongation factor B polypeptide 1 isoform X1	Nucleus	Regulation of nucleobase, nucleoside, nucleotide and nucleic acid metabolism	Transcription regulator activity	1	2	12.5	4.78	YES
767952381	NDRG1	PREDICTED: protein NDRG1 isoform X1	Cytoplasm	Cell communication	Molecular function unknown	4	12	44.7	5.82	YES
767953118	RMDN1	PREDICTED: regulator of microtubule dynamics protein 1 isoform X1	-	-	-	1	2	44	8.56	YES
767953542	MROH1	PREDICTED: maestro heat-like repeat-containing protein family member 1 isoform X1	-	-	-	1	2	193.1	7.09	YES
767953793	MTDH	PREDICTED: protein LYRIC isoform X1	Endoplasmic reticulum	Biological_process unknown	Molecular function unknown	1	2	66.9	9.28	YES
767955207	SH3GL2	PREDICTED: endophilin-A1 isoform X1	Cytoplasm	Cell communication	Molecular function unknown	2	6	44.3	5.48	YES
767956804	RABGAP1	PREDICTED: rab GTPase-activating protein 1 isoform X1	Cytoplasm	Cell communication	GTPase activator activity	2	8	121.7	5.25	YES
767956956	GPSM1	PREDICTED: G-protein-signaling modulator 1 isoform X2	Cytoplasm	Cell communication	GTPase activator activity	1	2	78.2	6.95	YES
767957496	ASS1	PREDICTED: argininosuccinate synthase isoform X1	Cytosol	Energy pathways	Catalytic activity	4	14	50.8	8.4	YES
767957824	PPP2R4	PREDICTED: serine/threonine-protein phosphatase 2A activator isoform X1	Nucleus	Regulation of cell cycle	Phosphatase regulator activity	3	8	50.9	7.66	YES
767958073	FAM129B	PREDICTED: niban-like protein 1 isoform X2	Nucleus	Biological_process unknown	Molecular function unknown	2	4	87.5	6.05	YES
767958426	FSD1L	PREDICTED: FSD1-like protein isoform X1	-	Biological_process unknown	Molecular function unknown	2	4	61.6	7.23	YES
767961932	DOCK1	PREDICTED: dedicator of cytokinesis protein 1 isoform X1	Cytoplasm	Cell communication	Guanyl-nucleotide exchange factor activity	1	2	219.8	7.62	YES
767962380	HERC4	PREDICTED: probable E3 ubiquitin-protein ligase HERC4 isoform X1	Cytoplasm	Protein metabolism	Ubiquitin-specific protease activity	1	2	121.1	6.29	YES
767963256	OGDHL	PREDICTED: 2-oxoglutarate dehydrogenase-like, mitochondrial isoform X1	-	Biological_process unknown	Molecular function unknown	10	41	114.4	6.65	YES
767963925	TSPAN14	PREDICTED: tetraspanin-14 isoform X1	Integral to membrane	Biological_process unknown	Molecular function unknown	1	2	32.4	7.74	YES
767964333	SEC24C	PREDICTED: protein transport protein Sec24C isoform X1	Endoplasmic reticulum	Transport	Transporter activity	3	8	120.9	7.09	YES
767965806	ILK	PREDICTED: integrin-linked protein kinase isoform X1	Cytoplasm	Cell communication	Protein serine/threonine kinase activity	2	4	51.4	8.07	YES
767965879	ARHGAP1	PREDICTED: rho GTPase-activating protein 1 isoform X2	Cytoplasm	Cell communication	GTPase activator activity	6	32	50.4	6.29	YES
767966276	RNH1	PREDICTED: ribonuclease inhibitor isoform X1	Cytoplasm	Regulation of nucleobase, nucleoside, nucleotide and nucleic acid metabolism	Translation regulator activity	8	22	49.9	4.82	YES
767966354	CHID1	PREDICTED: chitinase domain-containing protein 1 isoform X1	Lysosome	Transport	Transporter activity	3	6	53.4	8.32	YES
767966553	SLC25A22	PREDICTED: mitochondrial glutamate carrier 1 isoform X1	Mitochondrion	Transport	Auxiliary transport protein activity	2	5	34.4	9.29	YES
767967976	PGM2L1	PREDICTED: glucose 1,6-bisphosphate synthase isoform X1	Cytoplasm	Metabolism	Catalytic activity	17	45	72.8	7.33	YES
767968057	ANKRD13D	PREDICTED: ankyrin repeat domain-containing protein 13D isoform X1	-	Biological_process unknown	Ubiquitin binding	2	4	73.3	6.01	YES
767968258	NUMA1	PREDICTED: nuclear mitotic apparatus protein 1 isoform X1	Nucleus	Cell growth and/or maintenance	Structural molecule activity	3	6	240.1	5.82	YES
767968321	PC	PREDICTED: pyruvate carboxylase, mitochondrial isoform X2	Mitochondrion	Metabolism	Ligase activity	1	36	81.6	6.28	YES
767968674	CAPN5	PREDICTED: calpain-5 isoform X1	Cytoplasm	Protein metabolism	Cysteine-type peptidase activity	5	14	77.2	7.39	YES
767968844	CAPN1	PREDICTED: calpain-1 catalytic subunit isoform X1	Cytoplasm	Protein metabolism	Cysteine-type peptidase activity	15	46	81.8	5.67	YES
767968974	SYT7	PREDICTED: synaptotagmin-7 isoform X1	Endosome	Regulation of exocytosis	Calcium ion binding	1	4	76.4	9.52	YES
767969603	CRYAB	PREDICTED: alpha-crystallin B chain isoform X1	Nucleus	Protein metabolism	Heat shock protein activity	1	4	20.1	7.33	YES
767970045	C11orf54	PREDICTED: ester hydrolase C11orf54 isoform X1	-	Biological_process unknown	Molecular function unknown	1	1	35.1	6.7	YES
767970091	HSPA8	PREDICTED: heat shock cognate 71 kDa protein isoform X1	Cytoplasm	Protein metabolism	Heat shock protein activity	23	384	70.9	5.52	YES
767970165	VWA5A	PREDICTED: von Willebrand factor A domain-containing protein 5A isoform X1	Cytoplasm	Biological_process unknown	Molecular function unknown	2	6	88.2	6.58	YES
767973235	CNTN1	PREDICTED: contactin-1 isoform X1	Plasma membrane	Cell growth and/or maintenance	Cell adhesion molecule activity	16	64	113.2	5.9	YES
767973520	RPH3A	PREDICTED: rabphilin-3A isoform X1	Cytoplasmic vesicle	Transport	Auxiliary transport protein activity	3	6	76.8	8.34	YES
767974412	ATP2B1	PREDICTED: plasma membrane calcium-transporting ATPase 1 isoform X1	Plasma membrane	Transport	ATPase activity	1	22	137.7	6	YES
767974682	PPP1CC	PREDICTED: serine/threonine-protein phosphatase PP1-gamma catalytic subunit isoform X1	Nucleus	Cell communication	Protein serine/threonine phosphatase activity	1	15	41.4	6.07	YES
767974941	CALCOCO1	PREDICTED: calcium-binding and coiled-coil domain-containing protein 1 isoform X1	Cytoplasm	Regulation of nucleobase, nucleoside, nucleotide and nucleic acid metabolism	Transcription regulator activity	1	1	79.7	4.84	YES
767975192	STAT2	PREDICTED: signal transducer and activator of transcription 2 isoform X1	Cytoplasm	Regulation of nucleobase, nucleoside, nucleotide and nucleic acid metabolism	Transcription factor activity	1	2	98.7	5.49	YES
767975501	EEA1	PREDICTED: early endosome antigen 1 isoform X1	Endosome	Transport	Auxiliary transport protein activity	1	2	167.2	5.66	YES
767978014	UCHL3	PREDICTED: ubiquitin carboxyl-terminal hydrolase isozyme L3 isoform X1	Cytoplasm	Protein metabolism	Ubiquitin-specific protease activity	2	6	33.2	6.47	YES
767978915	DNAJC3	PREDICTED: dnaJ homolog subfamily C member 3 isoform X1	Cytoplasm	Protein metabolism	Translation regulator activity	4	12	61	6.28	YES
767979539	FBLN5	PREDICTED: fibulin-5 isoform X1	Extracellular	Cell growth and/or maintenance	Extracellular matrix structural constituent	1	2	53.5	4.87	YES
767979880	CTSG	PREDICTED: cathepsin G isoform X1	Plasma membrane	Protein metabolism	Serine-type peptidase activity	2	6	30.2	10.98	YES
767980426	HNRNPC	PREDICTED: heterogeneous nuclear ribonucleoproteins C1/C2 isoform X1	Nucleus	Regulation of nucleobase, nucleoside, nucleotide and nucleic acid metabolism	RNA binding	8	27	33.7	5.08	YES
767980753	GNG2	PREDICTED: guanine nucleotide-binding protein G(I)/G(S)/G(O) subunit gamma-2 isoform X1	-	Cell communication	GTPase activity	1	4	7.8	7.99	YES
767981059	SDR39U1	PREDICTED: epimerase family protein SDR39U1 isoform X1	-	Biological_process unknown	Molecular function unknown	7	38	33.5	9.07	YES
767984585	COMMD4	PREDICTED: COMM domain-containing protein 4 isoform X1	-	Biological_process unknown	Molecular function unknown	2	4	24.6	7.9	YES
767984693	UNC45A	PREDICTED: protein unc-45 homolog A isoform X1	Nucleus	Biological_process unknown	Molecular function unknown	2	6	103	6.07	YES
767984880	RAB27A	PREDICTED: ras-related protein Rab-27A isoform X1	Plasma membrane	Immune response	GTPase activity	6	22	24.9	5.22	YES
767986982	ABAT	PREDICTED: 4-aminobutyrate aminotransferase, mitochondrial isoform X1	Mitochondrion	Metabolism	Transaminase activity	17	80	56.4	7.96	YES
767987757	C16orf13	PREDICTED: UPF0585 protein C16orf13 isoform X1	-	Biological_process unknown	Molecular function unknown	2	6	29.5	7.99	YES
767988216	CORO1A	PREDICTED: coronin-1A isoform X2	Cytoplasm	Cell growth and/or maintenance	Cytoskeletal protein binding	9	28	51	6.68	YES
767988593	LCMT1	PREDICTED: leucine carboxyl methyltransferase 1 isoform X1	-	Protein modification	Methyltransferase activity	1	4	41.1	7.01	YES
767989318	DDX19B	PREDICTED: ATP-dependent RNA helicase DDX19B isoform X1	Nucleus	Metabolism	ATPase activity	1	2	59.9	6.67	YES
767991900	MPRIP	PREDICTED: myosin phosphatase Rho-interacting protein isoform X1	Cytoplasm	Regulation of cell shape	Cytoskeletal protein binding	1	2	277.4	5.67	YES
767992184	MYH10	PREDICTED: myosin-10 isoform X7	Cytoplasm	Cell growth and/or maintenance	Structural molecule activity	24	132	235.7	5.6	YES
767992245	PAFAH1B1	PREDICTED: platelet-activating factor acetylhydrolase IB subunit alpha isoform X2	Cytoplasm	Metabolism	Hydrolase activity	9	39	48.7	7.06	YES
767992663	RABEP1	PREDICTED: rab GTPase-binding effector protein 1 isoform X1	Cytoplasm	Cell communication	GTPase activator activity	4	8	101.8	5.05	YES
767993857	AP2B1	PREDICTED: AP-2 complex subunit beta isoform X1	Plasma membrane	Biological_process unknown	Molecular function unknown	20	185	109.3	5.48	YES
767994460	GIT1	PREDICTED: ARF GTPase-activating protein GIT1 isoform X1	Cytoplasm	Cell communication	GTPase activator activity	1	2	86.2	7.03	YES
767995224	NPLOC4	PREDICTED: nuclear protein localization protein 4 homolog isoform X1	Nucleus	Transport	Transporter activity	4	9	69.4	6.68	YES
767995517	FKBP10	PREDICTED: peptidyl-prolyl cis-trans isomerase FKBP10 isoform X1	Endoplasmic reticulum	Protein folding	Isomerase activity	3	5	66.3	5.76	YES
767995662	STAT3	PREDICTED: signal transducer and activator of transcription 3 isoform X1	Cytoplasm	Regulation of nucleobase, nucleoside, nucleotide and nucleic acid metabolism	Transcription factor activity	10	22	88	6.3	YES
767996099	PIP4K2B	PREDICTED: phosphatidylinositol 5-phosphate 4-kinase type-2 beta isoform X1	Plasma membrane	Cell communication	Lipid kinase activity	1	2	50.2	7.81	YES
767996324	AOC3	PREDICTED: membrane primary amine oxidase isoform X1	Plasma membrane	Immune response	Cell adhesion molecule activity	1	6	88	6.61	YES
767997602	EPB41L3	PREDICTED: band 4.1-like protein 3 isoform X4	Plasma membrane	Cell growth and/or maintenance	Structural molecule activity	20	190	105	5.25	YES
767997807	PTPRM	PREDICTED: receptor-type tyrosine-protein phosphatase mu isoform X7	Plasma membrane	Cell communication	Receptor signaling protein tyrosine phosphatase activity	1	2	169.1	6.58	YES
767997919	NAPG	PREDICTED: gamma-soluble NSF attachment protein isoform X1	Cytoplasm	Transport	Auxiliary transport protein activity	3	8	41.3	6.1	YES
767998954	CNDP2	PREDICTED: cytosolic non-specific dipeptidase isoform X1	Cytoplasm	Protein metabolism	Metallopeptidase activity	19	81	52.8	5.97	YES
767999390	HDHD2	PREDICTED: haloacid dehalogenase-like hydrolase domain-containing protein 2 isoform X1	-	Metabolism	Hydrolase activity	3	9	28.5	6.24	YES
768000699	CDC37	PREDICTED: hsp90 co-chaperone Cdc37 isoform X1	Cytoplasm	Protein metabolism	Chaperone activity	4	11	50	5.76	YES
768000711	COPE	PREDICTED: coatomer subunit epsilon isoform X1	Cytoplasm	Transport	Transporter activity	3	6	36.9	5.16	YES
768001228	ELANE	PREDICTED: neutrophil elastase isoform X1	Cytoplasm	Protein metabolism	Serine-type peptidase activity	1	2	28.5	9.35	YES
768002378	SLC27A1	PREDICTED: long-chain fatty acid transport protein 1 isoform X1	Plasma membrane	Transport	Auxiliary transport protein activity	1	2	72.4	8.6	YES
768002466	RAB8A	PREDICTED: ras-related protein Rab-8A isoform X1	Nucleus	Cell communication	GTPase activity	1	29	24.5	8.78	YES
768003436	SGTA	PREDICTED: small glutamine-rich tetratricopeptide repeat-containing protein alpha isoform X1	Cytoplasm	Protein metabolism	Chaperone activity	1	4	34	4.87	YES
768005786	UBA2	PREDICTED: SUMO-activating enzyme subunit 2 isoform X1	-	Protein metabolism	Ubiquitin-specific protease activity	2	4	83.2	6.34	YES
768011134	MYH14	PREDICTED: myosin-14 isoform X1	-	Cell growth and/or maintenance	Structural molecule activity	5	44	232.9	5.68	YES
768013275	DSTN	PREDICTED: destrin isoform X1	Nucleus	Cell growth and/or maintenance	Cytoskeletal protein binding	3	8	18.5	7.85	YES
768014078	NSFL1C	PREDICTED: NSFL1 cofactor p47 isoform X1	Cytoplasm	Cell growth and/or maintenance	Molecular function unknown	2	4	41.2	5.21	YES
768016461	EPB41L1	PREDICTED: band 4.1-like protein 1 isoform X1	Plasma membrane	Cell growth and/or maintenance	Cytoskeletal protein binding	11	48	174	5.53	YES
768018231	TGM2	PREDICTED: protein-glutamine gamma-glutamyltransferase 2 isoform X1	Extracellular	Metabolism	Transaminase activity	24	138	77.3	5.22	YES
768018320	DNAJC5	PREDICTED: dnaJ homolog subfamily C member 5 isoform X1	Cytoplasmic vesicle	Protein metabolism	Chaperone activity	3	18	22.1	5.07	YES
768020214	COL6A2	PREDICTED: collagen alpha-2(VI) chain isoform X1	Extracellular	Cell growth and/or maintenance	Extracellular matrix structural constituent	9	84	108.5	6.21	YES
768020750	LSS	PREDICTED: lanosterol synthase isoform X1	Endoplasmic reticulum	Metabolism	Catalytic activity	2	4	84.3	6.68	YES
768023240	PACSIN2	PREDICTED: protein kinase C and casein kinase substrate in neurons protein 2 isoform X1	Cytoplasm	Cell communication	Receptor signaling complex scaffold activity	2	4	55.9	5.14	YES
768023409	COMT	PREDICTED: catechol O-methyltransferase isoform X1	Cytoplasm	Metabolism	Acyltransferase activity	5	14	34.2	5.64	YES
768023815	ADSL	PREDICTED: adenylosuccinate lyase isoform X1	Cytoplasm	Metabolism	Lyase activity	1	2	59.3	7.09	YES
768024611	GGT5	PREDICTED: gamma-glutamyltransferase 5 isoform X1	Plasma membrane	Metabolism	Transferase activity	5	18	66.2	7.71	YES
768031366	PLXNB2	PREDICTED: plexin-B2 isoform X1	Plasma membrane	Cell communication	Receptor activity	4	8	211.7	6.19	YES
768032583	CTPS2	PREDICTED: CTP synthase 2 isoform X1	-	Regulation of nucleobase, nucleoside, nucleotide and nucleic acid metabolism	Ligase activity	1	2	70.5	7.06	YES
768032772	APOO	PREDICTED: MICOS complex subunit MIC26 isoform X1	Mitochondrion	Biological_process unknown	Molecular function unknown	1	2	22.8	9.26	YES
768033269	GRIPAP1	PREDICTED: GRIP1-associated protein 1 isoform X1	-	Signal transduction	Guanyl-nucleotide exchange factor activity	3	6	97.1	5.12	YES
768035908	CASK	PREDICTED: peripheral plasma membrane protein CASK isoform X1	Plasma membrane	Cell communication	Protein serine/threonine kinase activity	2	4	105.1	6.55	YES
768037765	MSN	PREDICTED: moesin isoform X1	Plasma membrane	Cell growth and/or maintenance	Structural constituent of cytoskeleton	15	114	71.3	6.06	YES
768039038	SEPT6	PREDICTED: septin-6 isoform X1	Cytoplasmic vesicle	Biological_process unknown	Molecular function unknown	5	57	59.9	7.37	YES
768039106	IGSF1	PREDICTED: immunoglobulin superfamily member 1 isoform X1	Plasma membrane	Immune response	Antigen binding	2	6	149.3	5.9	YES
768039461	CUL4B	PREDICTED: cullin-4B isoform X5	Nucleus	Protein metabolism	Ubiquitin-specific protease activity	2	6	82.2	8.29	YES
806638628	STK11IP	serine/threonine-protein kinase 11-interacting protein	Cytoplasm	Cell communication	Molecular function unknown	1	2	120.2	5.36	YES
815891246	PTPRN2	receptor-type tyrosine-protein phosphatase N2 isoform 5	Plasma membrane	Signal transduction	Receptor signaling protein tyrosine phosphatase activity	7	39	114.3	5.64	YES
909618061	AP2M1	AP-2 complex subunit mu isoform c	Plasma membrane	Transport	Receptor signaling complex scaffold activity	5	20	52.3	9.5	YES
926459555	HMGB1	high mobility group protein B1	Nucleus	Regulation of nucleobase, nucleoside, nucleotide and nucleic acid metabolism	DNA binding	4	10	24.9	5.74	YES
927669104	RHOA	transforming protein RhoA isoform 1	Actin cytoskeleton	Cell communication	GTPase activity	2	10	21.8	6.1	YES
936697130	PROS1	vitamin K-dependent protein S isoform 1	Extracellular	Protein metabolism	Protease inhibitor activity	1	2	78.8	5.74	YES
950426340	DPM1	dolichol-phosphate mannosyltransferase subunit 1 isoform 1	Plasma membrane	Metabolism	Mannosyltransferase activity	2	4	33.3	9.14	YES
951233290	WDR77	methylosome protein 50 isoform 1	Nucleus	Biological_process unknown	Molecular function unknown	2	6	38	5.12	YES
952977816	DNAJB4	dnaJ homolog subfamily B member 4 isoform a	-	Protein metabolism	Heat shock protein activity	2	8	37.8	8.5	YES
953514538	C5	complement C5 isoform 2	Extracellular	Immune response	Complement activity	1	2	188.5	6.65	YES
953768340	CHCHD3	MICOS complex subunit MIC19 isoform 1	-	Biological_process unknown	Molecular function unknown	7	26	26.7	7.75	YES
954170033	MTCH2	mitochondrial carrier homolog 2 isoform 1x	Mitochondrion	Cell communication	Molecular function unknown	2	3	34.4	8.09	YES
959092920	HSPA4L	heat shock 70 kDa protein 4L isoform 2	Cytoplasm	Protein metabolism	Heat shock protein activity	13	51	97.6	5.95	YES
960513905	TSTA3	GDP-L-fucose synthase isoform 1	Cytoplasm	Metabolism	Oxidoreductase activity	1	2	36.6	6.6	YES
962606960	ARL10	ADP-ribosylation factor-like protein 10 isoform 1	-	Cell communication	GTPase activity	1	1	31.1	5.54	YES
966209822	SLC27A6	long-chain fatty acid transport protein 6	Plasma membrane	Lipid transport	Lipid transporter activity	5	12	70.1	8.51	YES
966751411	APOA1	apolipoprotein A-I isoform 1 preproprotein	Extracellular	Transport	Transporter activity	26	148	30.8	5.76	YES
970259874	SEC31A	protein transport protein Sec31A isoform 1	Cytoplasm	Transport	Transporter activity	2	6	132.9	6.89	YES
970259878	AK1	adenylate kinase isoenzyme 1 isoform 2	Plasma membrane	Metabolism	Catalytic activity	6	14	23.4	8.6	YES
974005362	OCRL	inositol polyphosphate 5-phosphatase OCRL-1 isoform c	Golgi apparatus	Vesicle-mediated transport	Acid phosphatase activity	1	2	104.3	6.58	YES
974005364	HEXA	beta-hexosaminidase subunit alpha isoform 1	Lysosome	Metabolism	Hydrolase activity	1	2	62	5.21	YES
974576775	LSAMP	limbic system-associated membrane protein isoform 2	Plasma membrane	Cell communication	Cell adhesion molecule activity	5	23	39.9	7.64	YES
981220796	OGN	mimecan isoform 1	Extracellular	Organogenesis	Growth factor activity	13	196	40.5	7.99	YES
981220813	DNPEP	aspartyl aminopeptidase isoform a	Cytoplasm	Protein metabolism	Aminopeptidase activity	1	2	54.5	7.74	YES
984290516	HDGF	hepatoma-derived growth factor isoform d	Nucleus	Cell communication	Growth factor activity	1	2	29	4.79	YES
984290552	POMC	pro-opiomelanocortin preproprotein	Nucleus	Signal transduction	Hormone activity	10	181	29.4	7.65	YES
1001541327	TUBG2	tubulin gamma-2 chain isoform 1	Nucleus	Cell growth and/or maintenance	Cytoskeletal protein binding	1	2	52.1	6.02	YES
1002095800	DDX5	probable ATP-dependent RNA helicase DDX5 isoform b	Nucleus	Regulation of nucleobase, nucleoside, nucleotide and nucleic acid metabolism	RNA binding	9	38	69	8.85	YES
1002095820	CHCHD6	MICOS complex subunit MIC25 isoform 1	-	Biological_process unknown	Molecular function unknown	7	20	26.6	8.85	YES
1002341757	ADD3	gamma-adducin isoform a	Plasma membrane	Cell growth and/or maintenance	Cytoskeletal protein binding	2	6	79.1	6.32	YES
1002623478	ANXA4	annexin A4 isoform a	Nucleus	Cell communication	Calcium ion binding	3	10	36.1	6.13	YES
1008909360	NRBP1	nuclear receptor-binding protein isoform 2	Nucleus	Cell communication	Receptor signaling complex scaffold activity	3	6	60.8	5.16	YES
1009287475	TMED2	transmembrane emp24 domain-containing protein 2 isoform 2	Golgi apparatus	Transport	Transporter activity	1	2	23.4	5.01	YES
1009287518	ARHGDIB	rho GDP-dissociation inhibitor 2	Cytoplasm	Cell communication	Receptor signaling complex scaffold activity	3	5	23	5.21	YES
1010228567	CAMK2D	calcium/calmodulin-dependent protein kinase type II subunit delta isoform 9	Cytoplasm	Regulation of cell growth	Protein serine/threonine kinase activity	2	20	60	7.27	YES
1012282653	EXOC6B	exocyst complex component 6B isoform 1	-	Cell-cell signaling	Molecular function unknown	1	2	94.6	6.46	YES
1012443553	CPSF3	cleavage and polyadenylation specificity factor subunit 3 isoform d	Nucleus	Regulation of nucleobase, nucleoside, nucleotide and nucleic acid metabolism	RNA binding	1	2	78	5.9	YES
1013386825	CKMT1A	creatine kinase U-type, mitochondrial isoform 1	Mitochondrion	Energy pathways	Transferase activity	16	118	47	8.34	YES
1015190665	ACTN4	alpha-actinin-4 isoform 2	Cytoplasm	Cell growth and/or maintenance	Structural constituent of cytoskeleton	1	188	104.3	5.5	YES
1016841120	HK1	hexokinase-1 isoform a	Cytoplasm	Metabolism	Catalytic activity	37	316	106.2	7.06	YES
1016841132	HNRNPH3	heterogeneous nuclear ribonucleoprotein H3 isoform a	Nucleus	Regulation of nucleobase, nucleoside, nucleotide and nucleic acid metabolism	Ribonucleoprotein	5	24	36.9	6.87	YES
1017029493	GSS	glutathione synthetase	-	Metabolism	Ligase activity	11	43	52.4	5.92	YES
1018443211	SNAP25	synaptosomal-associated protein 25 isoform SNAP25B	Plasma membrane	Transport	Auxiliary transport protein activity	6	14	23.3	4.77	YES
1018443242	SFXN1	sideroflexin-1 isoform 1	Mitochondrion	Transport	Transporter activity	3	9	35.6	9.07	YES
1018443291	PCBD1	pterin-4-alpha-carbinolamine dehydratase isoform 2	Cytoplasm	Metabolism	Hydro-lyase activity	1	4	12	8.22	YES
1020738530	ALDH18A1	delta-1-pyrroline-5-carboxylate synthase isoform 1	Mitochondrion	Metabolism	Ligase activity	2	8	87.2	7.12	YES
1022434686	CTNNA1	catenin alpha-1 isoform 1	Cytoplasm	Cell growth and/or maintenance	Structural constituent of cytoskeleton	11	27	100	6.29	YES
1022943224	XPNPEP1	xaa-Pro aminopeptidase 1 isoform 6	Cytoplasm	Protein metabolism	Aminopeptidase activity	4	8	77.5	5.74	YES
1024249260	RPN2	dolichyl-diphosphooligosaccharide--protein glycosyltransferase subunit 2 isoform 7	Endoplasmic reticulum	Protein metabolism	Transferase activity	5	14	71.1	5.97	YES
1034554830	NUDC	PREDICTED: nuclear migration protein nudC isoform X1	Cytoplasm	Cell communication	Protein binding	4	10	45.2	5.96	YES
1034554931	TDRKH	PREDICTED: tudor and KH domain-containing protein isoform X1	-	Regulation of nucleobase, nucleoside, nucleotide and nucleic acid metabolism	RNA binding	1	2	62	5.02	YES
1034554955	RER1	PREDICTED: protein RER1 isoform X3	Golgi apparatus	Biological_process unknown	Molecular function unknown	1	1	22.9	9.54	YES
1034556984	ADGRL2	PREDICTED: adhesion G protein-coupled receptor L2 isoform X1	-	-	-	4	10	163.8	6.48	YES
1034557226	TARDBP	PREDICTED: TAR DNA-binding protein 43 isoform X1	Nucleus	Regulation of nucleobase, nucleoside, nucleotide and nucleic acid metabolism	DNA binding	5	28	44.7	6.19	YES
1034557577	DNM3	PREDICTED: dynamin-3 isoform X1	-	Cell communication	GTPase activity	5	70	103.7	8.18	YES
1034557812	GCLM	PREDICTED: glutamate--cysteine ligase regulatory subunit isoform X1	-	Metabolism	Ligase activity	2	6	30.4	5.74	YES
1034557822	GNB1	PREDICTED: guanine nucleotide-binding protein G(I)/G(S)/G(T) subunit beta-1 isoform X1	Plasma membrane	Cell communication	GTPase activity	10	169	37.4	6	YES
1034560222	GNG12	PREDICTED: guanine nucleotide-binding protein G(I)/G(S)/G(O) subunit gamma-12 isoform X1	Cytoplasm	Cell communication	GTPase activity	1	2	8	8.97	YES
1034560683	RAB3B	PREDICTED: ras-related protein Rab-3B isoform X1	Plasma membrane	Cell communication	GTPase activity	1	35	24.7	5.02	YES
1034560691	RAP1A	PREDICTED: ras-related protein Rap-1A isoform X2	Nucleus	Cell communication	GTPase activity	3	18	21	6.67	YES
1034560904	S100A6	PREDICTED: protein S100-A6 isoform X1	Cytoplasm	Cell communication	Calcium ion binding	1	4	10.2	5.48	YES
1034560973	SFPQ	PREDICTED: splicing factor, proline- and glutamine-rich isoform X1	Nucleus	Regulation of nucleobase, nucleoside, nucleotide and nucleic acid metabolism	RNA binding	9	37	76.1	9.44	YES
1034561572	C8B	PREDICTED: complement component C8 beta chain isoform X1	Extracellular	Immune response	Complement activity	1	2	66.9	8.07	YES
1034562188	CAPZA1	PREDICTED: F-actin-capping protein subunit alpha-1 isoform X1	Cytoplasm	Cell growth and/or maintenance	Structural molecule activity	4	9	36.5	5.85	YES
1034563421	VAMP3	PREDICTED: vesicle-associated membrane protein 3 isoform X1	Plasma membrane	Transport	Protein binding	1	8	13.8	8.44	YES
1034567868	ANK3	PREDICTED: ankyrin-3 isoform X1	Plasma membrane	Cell communication	Receptor signaling complex scaffold activity	1	42	494.1	6.35	YES
1034568756	PPP2R2D	PREDICTED: serine/threonine-protein phosphatase 2A 55 kDa regulatory subunit B delta isoform isoform X1	-	Biological_process unknown	Molecular function unknown	1	12	52.2	8.06	YES
1034569926	FAM213A	PREDICTED: redox-regulatory protein FAM213A isoform X1	-	-	-	2	6	26.3	8.62	YES
1034571481	NAALAD2	PREDICTED: N-acetylated-alpha-linked acidic dipeptidase 2 isoform X1	Plasma membrane	Metabolism	Hydrolase activity	2	4	87.7	8.7	YES
1034571662	HYOU1	PREDICTED: hypoxia up-regulated protein 1 isoform X1	Endoplasmic reticulum	Protein metabolism	Chaperone activity	10	36	111.3	5.22	YES
1034571759	ME3	PREDICTED: NADP-dependent malic enzyme, mitochondrial isoform X1	Mitochondrion	Metabolism	Oxidoreductase activity	3	8	80.4	8.78	YES
1034572188	DLG2	PREDICTED: disks large homolog 2 isoform X1	Plasma membrane	Cell communication	Cell adhesion molecule activity	4	11	116.6	6.27	YES
1034573051	DKK3	PREDICTED: dickkopf-related protein 3 isoform X1	Extracellular	Cell communication	Lipid binding	4	30	39.9	4.7	YES
1034573714	CAPRIN1	PREDICTED: caprin-1 isoform X1	Plasma membrane	Transport	Molecular function unknown	2	4	78.3	5.25	YES
1034573717	ARRB1	PREDICTED: beta-arrestin-1 isoform X1	Cytoplasm	Cell communication	Receptor signaling complex scaffold activity	1	4	53	7.33	YES
1034573882	NUCB2	PREDICTED: nucleobindin-2 isoform X1	Golgi apparatus	Cell communication	Calcium ion binding	5	14	50.3	5.12	YES
1034574070	PC	PREDICTED: pyruvate carboxylase, mitochondrial isoform X1	Mitochondrion	Metabolism	Ligase activity	7	56	129.6	6.84	YES
1034574453	TCP11L1	PREDICTED: T-complex protein 11-like protein 1 isoform X1	-	Biological_process unknown	Molecular function unknown	1	2	57.6	5.52	YES
1034574611	PSMC3	PREDICTED: 26S protease regulatory subunit 6A isoform X1	Nucleus	Protein metabolism	Ubiquitin-specific protease activity	5	18	51.2	5.25	YES
1034574620	SCYL1	PREDICTED: N-terminal kinase-like protein isoform X1	Centrosome	Regulation of nucleobase, nucleoside, nucleotide and nucleic acid metabolism	Transcription regulator activity	1	2	94.1	8.68	YES
1034577647	PTGES3	PREDICTED: prostaglandin E synthase 3 isoform X1	Cytoplasm	Protein metabolism	Chaperone activity	3	6	19.4	4.97	YES
1034577799	SDSL	PREDICTED: serine dehydratase-like isoform X1	-	Biological_process unknown	Molecular function unknown	3	8	36.2	7.24	YES
1034578030	COL2A1	PREDICTED: collagen alpha-1(II) chain isoform X1	Extracellular	Cell growth and/or maintenance	Extracellular matrix structural constituent	2	4	147.2	7.94	YES
1034578694	ERC1	PREDICTED: ELKS/Rab6-interacting/CAST family member 1 isoform X1	Cytoplasm	Energy pathways	Protein binding	1	4	131	6.05	YES
1034579492	KRAS	PREDICTED: GTPase KRas isoform X4	Mitochondrion	Signal transduction	GTPase activity	1	2	26.1	8.91	YES
1034579538	LRP1	PREDICTED: prolow-density lipoprotein receptor-related protein 1 isoform X1	Plasma membrane	Cell communication	Receptor activity	4	12	506	5.36	YES
1034579672	NAP1L1	PREDICTED: nucleosome assembly protein 1-like 1 isoform X1	Nucleus	Regulation of nucleobase, nucleoside, nucleotide and nucleic acid metabolism	DNA binding	3	13	45.3	4.46	YES
1034580048	VPS29	PREDICTED: vacuolar protein sorting-associated protein 29 isoform X1	Endosome	Protein targeting	Protein binding	1	2	24	8.18	YES
1034580873	PXN	PREDICTED: paxillin isoform X1	Focal adhesion	Signal transduction	Cell adhesion molecule activity	1	2	121.8	5.9	YES
1034580992	RAN	PREDICTED: GTP-binding nuclear protein Ran isoform X1	Nucleus	Cell communication	GTPase activity	6	19	25.3	8.41	YES
1034581040	RPL6	PREDICTED: 60S ribosomal protein L6 isoform X1	Nucleolus	Protein metabolism	Structural constituent of ribosome	2	6	32.7	10.58	YES
1034581403	SUOX	PREDICTED: sulfite oxidase, mitochondrial isoform X1	Mitochondrial intermembrane space	Metabolism	Catalytic activity	1	2	61	6.11	YES
1034581409	SYT1	PREDICTED: synaptotagmin-1 isoform X1	Cytoplasmic vesicle	Cell communication	Calcium ion binding	5	20	47.5	8.12	YES
1034581430	C1R	PREDICTED: complement C1r subcomponent isoform X1	Extracellular	Immune response	Complement activity	2	5	81.8	6.37	YES
1034584020	PDS5B	PREDICTED: sister chromatid cohesion protein PDS5 homolog B isoform X1	Nucleus	Regulation of nucleobase, nucleoside, nucleotide and nucleic acid metabolism	Transcription factor activity	1	2	164.7	8.47	YES
1034586339	TTC7B	PREDICTED: tetratricopeptide repeat protein 7B isoform X1	-	Biological_process unknown	Molecular function unknown	1	2	101.8	6.84	YES
1034586477	FKBP3	PREDICTED: peptidyl-prolyl cis-trans isomerase FKBP3 isoform X1	Nucleus	Metabolism	Isomerase activity	1	2	26	9.69	YES
1034587017	KTN1	PREDICTED: kinectin isoform X1	Endoplasmic reticulum	Cell growth and/or maintenance	Cytoskeletal anchoring activity	7	18	156.2	5.64	YES
1034587046	LGALS3	PREDICTED: galectin-3 isoform X1	Cytoplasm	Regulation of nucleobase, nucleoside, nucleotide and nucleic acid metabolism	Transcription regulator activity	7	57	27.8	8.94	YES
1034587293	DHRS7	PREDICTED: dehydrogenase/reductase SDR family member 7 isoform X1	-	Metabolism	Catalytic activity	2	3	45.4	8.94	YES
1034587342	PPM1A	PREDICTED: protein phosphatase 1A isoform X1	Cytoplasm	Signal transduction	Protein serine/threonine phosphatase activity	3	6	51.1	6.38	YES
1034587667	NDRG2	PREDICTED: protein NDRG2 isoform X3	Cytoplasm	Cell proliferation	Hydrolase activity	8	18	42.7	5.22	YES
1034588086	WARS	PREDICTED: tryptophan--tRNA ligase, cytoplasmic isoform X1	Cytoplasm	Protein metabolism	Ligase activity	10	32	53.1	6.23	YES
1034588484	PAPLN	PREDICTED: papilin isoform X6	Extracellular	Protein metabolism	Metallopeptidase activity	1	2	138.4	6.89	YES
1034590085	CYFIP1	PREDICTED: cytoplasmic FMR1-interacting protein 1 isoform X1	Cytoplasm	Biological_process unknown	Molecular function unknown	2	4	163.1	7.08	YES
1034590336	TMOD3	PREDICTED: tropomodulin-3 isoform X1	Cytoplasm	Cell growth and/or maintenance	Cytoskeletal protein binding	2	4	39.6	5.19	YES
1034590342	ANXA2	PREDICTED: annexin A2 isoform X1	Cytoplasm	Signal transduction	Calcium ion binding	20	149	38.6	7.75	YES
1034590503	IVD	PREDICTED: isovaleryl-CoA dehydrogenase, mitochondrial isoform X5	Mitochondrion	Metabolism	Catalytic activity	12	51	49.6	8.15	YES
1034590602	MAN2C1	PREDICTED: alpha-mannosidase 2C1 isoform X1	Cytoplasm	Metabolism	Hydrolase activity	1	2	117.2	6.65	YES
1034590616	MAP1A	PREDICTED: microtubule-associated protein 1A isoform X1	Cytoplasm	Cell growth and/or maintenance	Cytoskeletal protein binding	7	27	331.1	4.93	YES
1034590719	MYO5A	PREDICTED: unconventional myosin-Va isoform X1	Cytoplasm	Cell growth and/or maintenance	Structural molecule activity	1	2	221.2	8.48	YES
1034591669	TJP1	PREDICTED: tight junction protein ZO-1 isoform X1	Cell surface	Cell growth and/or maintenance	Cell adhesion molecule activity	4	11	210.3	7.37	YES
1034591719	TPM1	PREDICTED: tropomyosin alpha-1 chain isoform X1	Perinuclear region	Cell growth and/or maintenance	Cytoskeletal protein binding	2	27	44.8	5.49	YES
1034593885	ACSF3	PREDICTED: acyl-CoA synthetase family member 3, mitochondrial isoform X1	-	Biological_process unknown	Molecular function unknown	3	6	68	9.07	YES
1034595102	PDPR	PREDICTED: pyruvate dehydrogenase phosphatase regulatory subunit, mitochondrial isoform X1	-	-	-	1	2	99.3	6.35	YES
1034595786	SULT1A1	PREDICTED: sulfotransferase 1A1 isoform X3	Cytoplasm	Metabolism	Sulfotransferase activity	7	22	44.1	8.54	YES
1034595817	TSC2	PREDICTED: tuberin isoform X4	Plasma membrane	Cell communication	GTPase activator activity	1	2	208.1	8.13	YES
1034595923	USP7	PREDICTED: ubiquitin carboxyl-terminal hydrolase 7 isoform X1	Nucleus	Protein metabolism	Ubiquitin-specific protease activity	6	12	129	5.35	YES
1034596769	IFT140	PREDICTED: intraflagellar transport protein 140 homolog isoform X1	-	Biological_process unknown	Molecular function unknown	1	2	165.1	6.04	YES
1034597977	DDX42	PREDICTED: ATP-dependent RNA helicase DDX42 isoform X1	Nucleus	Regulation of nucleobase, nucleoside, nucleotide and nucleic acid metabolism	RNA binding	1	2	102.9	7.02	YES
1034598889	ZZEF1	PREDICTED: zinc finger ZZ-type and EF-hand domain-containing protein 1 isoform X1	-	Biological_process unknown	Molecular function unknown	1	2	331.3	5.99	YES
1034599131	GFAP	PREDICTED: glial fibrillary acidic protein isoform X1	Cytoplasm	Cell growth and/or maintenance	Structural molecule activity	21	146	54.2	6.19	YES
1034599385	ABR	PREDICTED: active breakpoint cluster region-related protein isoform X1	Cytoplasm	Cell communication	GTPase activator activity	1	4	128.4	6.32	YES
1034599785	MPP2	PREDICTED: MAGUK p55 subfamily member 2 isoform X1	Plasma membrane	Cell communication	Molecular function unknown	1	2	70.6	7.03	YES
1034600502	PRPSAP2	PREDICTED: phosphoribosyl pyrophosphate synthase-associated protein 2 isoform X2	Nucleus	Regulation of nucleobase, nucleoside, nucleotide and nucleic acid metabolism	Molecular function unknown	2	8	46.9	8.25	YES
1034608396	PPP5C	PREDICTED: serine/threonine-protein phosphatase 5 isoform X1	Nucleus	Cell communication	Protein serine/threonine phosphatase activity	3	5	62.3	6.93	YES
1034608528	MAP2K2	PREDICTED: dual specificity mitogen-activated protein kinase kinase 2 isoform X1	Cytoplasm	Cell communication	Protein threonine/tyrosine kinase activity	5	10	56.3	8.91	YES
1034608806	EPS15L1	PREDICTED: epidermal growth factor receptor substrate 15-like 1 isoform X1	Nucleus	Cell communication	Calcium ion binding	3	8	101.3	5.07	YES
1034608858	UPF1	PREDICTED: regulator of nonsense transcripts 1 isoform X1	Cytoplasm	Regulation of translation	Helicase activity	5	10	125.1	6.58	YES
1034609583	UBXN6	PREDICTED: UBX domain-containing protein 6 isoform X1	Cytoplasm	Biological_process unknown	Molecular function unknown	5	12	53.1	7.18	YES
1034611141	IMMT	PREDICTED: MICOS complex subunit MIC60 isoform X1	Mitochondrion	Cell growth and/or maintenance	Motor activity	18	75	83.6	6.48	YES
1034612408	ACSL3	PREDICTED: long-chain-fatty-acid--CoA ligase 3 isoform X1	Mitochondrion	Fatty acid metabolism	CoA-ligase activity	4	10	80.4	8.38	YES
1034613074	GFPT1	PREDICTED: glutamine--fructose-6-phosphate aminotransferase [isomerizing] 1 isoform X1	Cytoplasm	Metabolism	Transaminase activity	1	2	81.5	7.66	YES
1034613393	GMPPA	PREDICTED: mannose-1-phosphate guanyltransferase alpha isoform X1	-	Carbohydrate mediated signaling	Phosphorylase activity	2	6	52.5	7.21	YES
1034614133	POTEE	PREDICTED: POTE ankyrin domain family member E isoform X4	Plasma membrane	Biological_process unknown	Molecular function unknown	2	469	121.3	6.2	YES
1034614226	SEPT2	PREDICTED: septin-2 isoform X1	Cytoplasm	Cell cycle	GTPase activity	14	72	50.8	7.46	YES
1034614794	KIF1A	PREDICTED: kinesin-like protein KIF1A isoform X1	Cytoplasm	Transport	Motor activity	3	8	205.7	5.47	YES
1034615583	PTPRN	PREDICTED: receptor-type tyrosine-protein phosphatase-like N isoform X1	Plasma membrane	Cell communication	Receptor signaling protein tyrosine phosphatase activity	16	97	105.9	7.11	YES
1034615659	BCS1L	PREDICTED: mitochondrial chaperone BCS1 isoform X1	Mitochondrion	Metabolism	Molecular function unknown	1	2	47.5	8.5	YES
1034620042	ADRM1	PREDICTED: proteasomal ubiquitin receptor ADRM1 isoform X1	Nucleus	Signal transduction	Molecular function unknown	2	4	42.8	5.15	YES
1034625016	GNAS	PREDICTED: protein GNAS isoform X1	Plasma membrane	Cell communication	GTPase activity	9	88	111	5.03	YES
1034625436	ARFGAP1	PREDICTED: ADP-ribosylation factor GTPase-activating protein 1 isoform X1	Golgi apparatus	Lipid metabolism	GTPase activator activity	1	2	45.9	5.78	YES
1034625721	SRC	PREDICTED: proto-oncogene tyrosine-protein kinase Src isoform X1	Nucleus	Signal transduction	Protein-tyrosine kinase activity	1	4	60.6	7.84	YES
1034625756	YWHAB	PREDICTED: 14-3-3 protein beta/alpha isoform X1	Cytoplasm	Signal transduction	Receptor signaling complex scaffold activity	11	111	28.1	4.83	YES
1034629002	MYH9	PREDICTED: myosin-9 isoform X1	Cytoplasm	Cell growth and/or maintenance	Structural molecule activity	66	515	226.4	5.6	YES
1034629194	SEPT3	PREDICTED: neuronal-specific septin-3 isoform X1	Cytoplasm	Cell communication	GTPase activity	8	37	92.3	9.22	YES
1034630704	ATG7	PREDICTED: ubiquitin-like modifier-activating enzyme ATG7 isoform X1	Cytoplasm	Cell growth and/or maintenance	Molecular function unknown	2	4	81.7	6.65	YES
1034632754	RABL3	PREDICTED: rab-like protein 3 isoform X1	-	Cell communication	GTPase activity	3	6	28.1	6.79	YES
1034633826	NCKIPSD	PREDICTED: NCK-interacting protein with SH3 domain isoform X1	Nucleus	Cell communication	Receptor signaling complex scaffold activity	2	4	82.9	6.68	YES
1034634605	LXN	PREDICTED: latexin isoform X1	-	Metabolism	Enzyme regulator activity	1	2	25.7	5.17	YES
1034635240	TF	PREDICTED: serotransferrin isoform X1	Endosome	Transport	Transporter activity	1	241	77	7.12	YES
1034636081	CADPS	PREDICTED: calcium-dependent secretion activator 1 isoform X1	Cytoplasm	Transport	Auxiliary transport protein activity	3	10	161.6	5.94	YES
1034636229	SNX4	PREDICTED: sorting nexin-4 isoform X1	Integral to membrane	Transport	Transporter activity	4	8	55.9	6.49	YES
1034638314	ADD1	PREDICTED: alpha-adducin isoform X3	Nucleus	Cell growth and/or maintenance	Structural molecule activity	9	54	84.3	5.96	YES
1034639511	ANK2	PREDICTED: ankyrin-2 isoform X1	Plasma membrane	Cell growth and/or maintenance	Cytoskeletal protein binding	25	188	458.6	5.11	YES
1034639896	MGST2	PREDICTED: microsomal glutathione S-transferase 2 isoform X1	Endoplasmic reticulum	Metabolism	Glutathione transferase activity	1	2	16.6	9.55	YES
1034640533	SEPT11	PREDICTED: septin-11 isoform X4	Perinuclear region	Cell cycle	GTPase activity	11	88	49.5	6.81	YES
1034640691	BDH2	PREDICTED: 3-hydroxybutyrate dehydrogenase type 2 isoform X1	-	Metabolism	Oxidoreductase activity	6	24	28.4	7.65	YES
1034641966	WDR1	PREDICTED: WD repeat-containing protein 1 isoform X1	Cytoplasm	Biological_process unknown	Molecular function unknown	14	56	72	6.9	YES
1034643172	CDH6	PREDICTED: cadherin-6 isoform X1	Plasma membrane	Cell communication	Cell adhesion molecule activity	1	2	88.3	4.93	YES
1034643208	G3BP1	PREDICTED: ras GTPase-activating protein-binding protein 1 isoform X1	Cytosol	Signal transduction	RNA binding	2	4	52.1	5.52	YES
1034643422	TPPP	PREDICTED: tubulin polymerization-promoting protein isoform X1	Cytoskeleton	Cell growth and/or maintenance	Structural constituent of cytoskeleton	5	16	30.4	9.11	YES
1034645402	TRIM36	PREDICTED: E3 ubiquitin-protein ligase TRIM36 isoform X1	Cytoplasm	Biological_process unknown	Molecular function unknown	2	4	84.9	6.49	YES
1034646048	VDAC1	PREDICTED: voltage-dependent anion-selective channel protein 1 isoform X1	Mitochondrion	Transport	Voltage-gated ion channel activity	16	166	30.8	8.54	YES
1034648562	MAPK14	PREDICTED: mitogen-activated protein kinase 14 isoform X1	Nucleus	Cell communication	Protein serine/threonine kinase activity	1	2	45.4	7.05	YES
1034648755	EPB41L2	PREDICTED: band 4.1-like protein 2 isoform X1	Plasma membrane	Cell communication	Structural constituent of cytoskeleton	7	28	118.4	5.49	YES
1034649438	SYNE1	PREDICTED: nesprin-1 isoform X1	Golgi apparatus	Cell growth and/or maintenance	Molecular function unknown	1	2	1015.9	5.53	YES
1034650222	LAMA2	PREDICTED: laminin subunit alpha-2 isoform X4	Extracellular	Cell growth and/or maintenance	Extracellular matrix structural constituent	11	36	354.1	6.52	YES
1034650780	EXOC2	PREDICTED: exocyst complex component 2 isoform X1	Plasma membrane	Transport	Auxiliary transport protein activity	3	6	104	6.9	YES
1034651369	DST	PREDICTED: dystonin isoform X1	Nucleus	Cell growth and/or maintenance	Cytoskeletal protein binding	2	4	888.9	5.35	YES
1034652357	AKAP12	PREDICTED: A-kinase anchor protein 12 isoform X1	Plasma membrane	Cell growth and/or maintenance	Cytoskeletal anchoring activity	7	28	191.4	4.41	YES
1034654343	DYNC1I1	PREDICTED: cytoplasmic dynein 1 intermediate chain 1 isoform X1	Cytoplasm	Cell growth and/or maintenance	Motor activity	12	39	72.9	5.12	YES
1034654804	SUMF2	PREDICTED: sulfatase-modifying factor 2 isoform X1	Endoplasmic reticulum	Protein metabolism	Molecular function unknown	2	4	41.8	9.99	YES
1034654993	AMPH	PREDICTED: amphiphysin isoform X1	Cytoplasm	Cell communication	Receptor signaling complex scaffold activity	7	33	139.1	4.53	YES
1034655603	LAMB1	PREDICTED: laminin subunit beta-1 isoform X1	Extracellular	Cell growth and/or maintenance	Extracellular matrix structural constituent	4	8	200.3	4.96	YES
1034656768	VGF	PREDICTED: neurosecretory protein VGF isoform X1	Extracellular	Cell communication	Growth factor activity	5	26	67.2	4.78	YES
1034658855	CPQ	PREDICTED: carboxypeptidase Q isoform X1	-	-	-	1	2	56	6.29	YES
1034659293	CYC1	PREDICTED: cytochrome c1, heme protein, mitochondrial isoform X1	Mitochondrion	Metabolism	Molecular function unknown	4	18	38	6.14	YES
1034659499	EEF1D	PREDICTED: elongation factor 1-delta isoform X1	Endoplasmic reticulum	Cell communication	Guanyl-nucleotide exchange factor activity	3	12	75.6	6.43	YES
1034659717	XPO7	PREDICTED: exportin-7 isoform X1	Nucleus	Transport	Transporter activity	2	4	124.9	6.42	YES
1034659931	AGO2	PREDICTED: protein argonaute-2 isoform X1	-	-	-	1	1	104	9.35	YES
1034660265	LY6H	PREDICTED: lymphocyte antigen 6H isoform X1	Plasma membrane	Immune response	Molecular function unknown	2	16	17.5	8.44	YES
1034660280	ASPH	PREDICTED: aspartyl/asparaginyl beta-hydroxylase isoform X1	Endoplasmic reticulum	Protein metabolism	Catalytic activity	7	26	90.4	5.05	YES
1034660621	FAM49B	PREDICTED: protein FAM49B isoform X1	-	Biological_process unknown	Molecular function unknown	1	2	36.7	6.06	YES
1034661454	YWHAZ	PREDICTED: 14-3-3 protein zeta/delta isoform X1	Cytoplasm	Regulation of cell cycle	Receptor signaling complex scaffold activity	20	214	27.7	4.79	YES
1034661896	CPNE3	PREDICTED: copine-3 isoform X1	Cytoplasm	Transport	Transporter activity	5	12	60.1	5.85	YES
1034661992	NAPRT	PREDICTED: nicotinate phosphoribosyltransferase isoform X1	-	-	-	1	2	73.1	7.66	YES
1034663785	CRAT	PREDICTED: carnitine O-acetyltransferase isoform X1	Mitochondrion	Metabolism	Acyltransferase activity	8	16	71.2	8.63	YES
1034665107	TNC	PREDICTED: tenascin isoform X1	Extracellular	Cell communication	Cell adhesion molecule activity	8	30	260.2	4.94	YES
1034670964	SET	PREDICTED: protein SET isoform X1	Cytoplasm	Regulation of nucleobase, nucleoside, nucleotide and nucleic acid metabolism	MHC class I receptor activity	6	20	35.8	4.45	YES
1034671940	GRHPR	PREDICTED: glyoxylate reductase/hydroxypyruvate reductase isoform X1	Cytoplasm	Metabolism	Catalytic activity	3	8	37	6.44	YES
1034673276	HUWE1	PREDICTED: E3 ubiquitin-protein ligase HUWE1 isoform X1	Nucleus	Regulation of nucleobase, nucleoside, nucleotide and nucleic acid metabolism	DNA binding	2	6	494	5.24	YES
1034674449	NSDHL	PREDICTED: sterol-4-alpha-carboxylate 3-dehydrogenase, decarboxylating isoform X1	Endoplasmic reticulum	Metabolism	Catalytic activity	2	4	43.8	8.21	YES
1034675091	UBA1	PREDICTED: ubiquitin-like modifier-activating enzyme 1 isoform X1	Nucleus	Proteolysis and peptidolysis	Ubiquitin-specific protease activity	29	176	123.1	5.85	YES
1034675684	SYTL4	PREDICTED: synaptotagmin-like protein 4 isoform X1	Secretory granule	Transport	Transporter activity	1	4	76.7	8.81	YES
1034677734	C4A	PREDICTED: complement C4-A isoform X1	Extracellular	Immune response	Complement activity	20	64	192.7	7.08	YES
4501883	ACTA2	actin, aortic smooth muscle	Cytoplasm	Cell growth and/or maintenance	Structural constituent of cytoskeleton	1	515	42	5.39	NO
4502201	ARF1	ADP-ribosylation factor 1	Cytoplasm	Signal transduction	GTPase activity	6	36	20.7	6.8	NO
4503095	CSNK2A1	casein kinase II subunit alpha isoform a	Nucleus	Signal transduction	Protein serine/threonine kinase activity	3	16	45.1	7.74	NO
4503471	EEF1A1	elongation factor 1-alpha 1	Cytoplasm	Regulation of cell cycle	Transcription regulator activity	14	518	50.1	9.01	NO
4503525	EIF3C	eukaryotic translation initiation factor 3 subunit C isoform a	Cytoplasm	Protein metabolism	Translation regulator activity	3	6	105.3	5.68	NO
4504285	HIST1H3C	histone H3.1	Nucleus	Regulation of nucleobase, nucleoside, nucleotide and nucleic acid metabolism	DNA binding	1	28	15.4	11.12	NO
4504317	HIST1H4L	histone H4	Nucleus	Regulation of nucleobase, nucleoside, nucleotide and nucleic acid metabolism	DNA binding	8	69	11.4	11.36	NO
4505185	MIF	macrophage migration inhibitory factor	Extracellular	Cell communication	Cytokine activity	3	16	12.5	7.88	NO
4505585	PAFAH1B2	platelet-activating factor acetylhydrolase IB subunit beta isoform a	Cytoplasm	Cell communication	Hydrolase activity	5	23	25.6	5.92	NO
4506153	PRSS8	prostasin preproprotein	Plasma membrane	Protein metabolism	Serine-type peptidase activity	1	1	36.4	5.85	NO
4506693	RPS17	40S ribosomal protein S17	Ribosome	Protein metabolism	Structural constituent of ribosome	1	2	15.5	9.85	NO
4507131	SNRPF	small nuclear ribonucleoprotein F	Nucleus	Regulation of nucleobase, nucleoside, nucleotide and nucleic acid metabolism	RNA binding	1	8	9.7	4.67	NO
4507133	SNRPG	small nuclear ribonucleoprotein G isoform a	Nucleus	Regulation of nucleobase, nucleoside, nucleotide and nucleic acid metabolism	RNA binding	1	4	8.5	8.88	NO
4507265	STC1	stanniocalcin-1	Extracellular	Cell communication	Calcium ion binding	1	4	27.6	7.99	NO
4557367	BLMH	bleomycin hydrolase	Cytoplasm	Metabolism	Hydrolase activity	2	4	52.5	6.27	NO
4757818	ATP6V1G1	V-type proton ATPase subunit G 1	Lysosome	Metabolism	Transporter activity	1	3	13.7	8.79	NO
4758154	DFNA5	non-syndromic hearing impairment protein 5 isoform a	-	Biological_process unknown	Molecular function unknown	1	2	54.5	5.17	NO
4759000	RAB3D	ras-related protein Rab-3D	Secretory granule	Transport	GTPase activity	1	49	24.3	4.93	NO
4885299	GPR15	G-protein coupled receptor 15	Plasma membrane	Cell communication	G-protein coupled receptor activity	1	1	40.8	8.72	NO
4885375	HIST1H1C	histone H1.2	Nucleus	Regulation of nucleobase, nucleoside, nucleotide and nucleic acid metabolism	DNA binding	2	4	21.4	10.93	NO
5031711	EIF1B	eukaryotic translation initiation factor 1b	Nucleus	Protein metabolism	Translation regulator activity	1	3	12.8	7.37	NO
5032117	SIGMAR1	sigma non-opioid intracellular receptor 1 isoform 1	Endoplasmic reticulum	Cell communication	Transmembrane receptor activity	1	4	25.1	5.96	NO
5032223	PLXNC1	plexin-C1	Plasma membrane	Cell communication	Receptor activity	3	8	175.6	7.61	NO
5174447	RACK1	receptor of activated protein C kinase 1	Cytoplasm	Cell communication	Receptor signaling complex scaffold activity	8	20	35.1	7.69	NO
5454088	ANP32B	acidic leucine-rich nuclear phosphoprotein 32 family member B	Nucleus	Biological_process unknown	Molecular function unknown	1	2	28.8	4.06	NO
5730087	DYNLT3	dynein light chain Tctex-type 3	-	Biological_process unknown	Molecular function unknown	1	2	13.1	5.66	NO
5803003	DIAPH2	protein diaphanous homolog 2 isoform 156	Cytoplasm	Cell communication	Receptor binding	1	2	125.5	6.58	NO
5803185	SYPL1	synaptophysin-like protein 1 isoform a	Microsome	Transport	Transporter activity	1	6	28.5	8.43	NO
7657058	EIF2B2	translation initiation factor eIF-2B subunit beta	Cytoplasm	Protein metabolism	Translation regulator activity	1	2	39	6.16	NO
7657069	ERO1A	ERO1-like protein alpha	Endoplasmic reticulum	Metabolism	Oxidoreductase activity	2	4	54.4	5.68	NO
7657116	GAPDHS	glyceraldehyde-3-phosphate dehydrogenase, testis-specific	Cell projection	Metabolism	Catalytic activity	1	11	44.5	8.19	NO
7657508	RBX1	E3 ubiquitin-protein ligase RBX1	Nucleus	Protein metabolism	Ubiquitin-specific protease activity	1	1	12.3	6.96	NO
7661580	WIPI2	WD repeat domain phosphoinositide-interacting protein 2 isoform a	-	Cell death	Molecular function unknown	1	2	49.4	6.46	NO
7705753	C1QA	complement C1q subcomponent subunit A	Extracellular	Immune response	Complement activity	1	2	26	9.11	NO
8923557	GID8	glucose-induced degradation protein 8 homolog	-	Biological_process unknown	Molecular function unknown	2	6	26.7	4.97	NO
8923812	ACOT13	acyl-coenzyme A thioesterase 13 isoform 1	-	Metabolism	Hydrolase activity	2	4	15	9.14	NO
8923870	SLC22A11	solute carrier family 22 member 11 isoform 1	Plasma membrane	Transport	Auxiliary transport protein activity	1	1	59.9	8.62	NO
10800130	HIST1H2AD	histone H2A type 1-D	Nucleus	Regulation of nucleobase, nucleoside, nucleotide and nucleic acid metabolism	DNA binding	2	50	14.1	10.9	NO
10800140	HIST1H2BB	histone H2B type 1-B	Nucleus	Regulation of nucleobase, nucleoside, nucleotide and nucleic acid metabolism	DNA binding	2	34	13.9	10.32	NO
10835256	PYCARD	apoptosis-associated speck-like protein containing a CARD isoform a	Cytoplasm	Apoptosis	Caspase activator activity	1	2	21.6	6.34	NO
10863895	TMSB10	thymosin beta-10	Nucleus	Cell growth and/or maintenance	Cytoskeletal protein binding	2	4	5	5.36	NO
10863929	RNASEL	2-5A-dependent ribonuclease	Cytoplasm	Regulation of nucleobase, nucleoside, nucleotide and nucleic acid metabolism	Ribonuclease activity	1	2	83.5	6.65	NO
11342666	MMP2	72 kDa type IV collagenase isoform 1 preproprotein	Extracellular	Protein metabolism	Metallopeptidase activity	1	2	73.8	5.47	NO
12232423	IPPK	inositol-pentakisphosphate 2-kinase	-	Biological_process unknown	Molecular function unknown	1	2	56	8.37	NO
13236585	FSD1	fibronectin type III and SPRY domain-containing protein 1	Centrosome	Biological_process unknown	Molecular function unknown	2	4	55.8	6.99	NO
13259533	AVP	vasopressin-neurophysin 2-copeptin preproprotein	Extracellular	Regulation of biological process	Peptide hormone	5	544	17.3	5.29	NO
13786127	CDC42EP4	cdc42 effector protein 4	Cytoplasm	Cell growth and/or maintenance	Structural constituent of cytoskeleton	3	10	38	5.19	NO
14150201	TMEM101	transmembrane protein 101 isoform a	-	Biological_process unknown	Molecular function unknown	1	1	28.8	9.57	NO
14389309	TUBA1C	tubulin alpha-1C chain isoform c	Cytoplasm	Cell growth and/or maintenance	Structural constituent of cytoskeleton	8	1972	49.9	5.1	NO
14702171	POLR2C	DNA-directed RNA polymerase II subunit RPB3	Nucleus	Regulation of nucleobase, nucleoside, nucleotide and nucleic acid metabolism	Transcription regulator activity	1	4	31.4	4.92	NO
15431316	KRT84	keratin, type II cuticular Hb4	-	Cell growth and/or maintenance	Structural molecule activity	1	45	64.8	7.56	NO
15431318	KRT38	keratin, type I cuticular Ha8	Cytoplasm	Cell growth and/or maintenance	Structural constituent of cytoskeleton	1	12	50.4	4.84	NO
16306479	CEP41	centrosomal protein of 41 kDa isoform 1	Centrosome	Biological_process unknown	Molecular function unknown	1	2	41.3	8.32	NO
16306502	FBXO21	F-box only protein 21 isoform 1	-	Protein metabolism	Ubiquitin-specific protease activity	1	2	72.2	6.09	NO
17921993	TUBA3C	tubulin alpha-3C/D chain	Cytoplasm	Cell growth and/or maintenance	Structural molecule activity	2	1690	49.9	5.1	NO
18079321	VSTM2L	V-set and transmembrane domain-containing protein 2-like protein	-	Biological_process unknown	Molecular function unknown	1	2	22.3	8.57	NO
18702325	CREB3L4	cyclic AMP-responsive element-binding protein 3-like protein 4 isoform 1	Cytoplasm	Regulation of nucleobase, nucleoside, nucleotide and nucleic acid metabolism	Transcription factor activity	1	11	43.4	5.43	NO
18765705	BPIFA1	BPI fold-containing family A member 1	Extracellular	Inflammatory response	Molecular function unknown	1	2	26.7	5.76	NO
19913446	HPCA	neuron-specific calcium-binding protein hippocalcin	Cytoplasm	Cell communication	Calcium ion binding	1	2	22.4	4.97	NO
19923359	PRKAB1	5'-AMP-activated protein kinase subunit beta-1	Cytoplasm	Cell communication	Protein binding	1	2	30.4	6.4	NO
19923717	DTX3L	E3 ubiquitin-protein ligase DTX3L	Nucleus	Protein metabolism	Ubiquitin-specific protease activity	1	1	83.5	8.06	NO
19923881	GNPDA2	glucosamine-6-phosphate isomerase 2 isoform 1	-	Metabolism	Deaminase activity	1	6	31.1	6.95	NO
20127457	GYG1	glycogenin-1 isoform 1	-	Metabolism	Molecular function unknown	2	4	39.4	5.53	NO
20127551	TRPV2	transient receptor potential cation channel subfamily V member 2	Plasma membrane	Cell communication	Auxiliary transport protein activity	3	6	85.9	5.83	NO
21361116	VCAN	versican core protein isoform 1	Extracellular	Cell growth and/or maintenance	Extracellular matrix structural constituent	1	2	372.6	4.51	NO
[truncated: 177 more rows]
